# Supplementary material for: Enantioselective copper-catalyzed hydrophosphination of alkenyl isoquinolines
Source: Royal Society of Chemistry journal article supplement (doi:10.1039/d2sc06950d), 2023-01-01
Supplement: d2sc06950d1.pdf [file d2sc06950d1.pdf]

## Supporting Information

### Enantioselective Copper-Catalyzed Hydrophosphination of Alkenyl Isoquinolines

Qingjing Yang,<sup>a</sup> Jian Zhou,<sup>a,b</sup> Jun (Joelle) Wang<sup>b\*</sup>

<sup>a</sup>Department of Chemistry, Southern University of Science and Technology, Shenzhen, Guangdong, 518055, China.

<sup>b</sup>Department of Chemistry, Hong Kong Baptist University, Kowloon, Hong Kong, China.

\*email: [junwang@hkbu.edu.hk](mailto:junwang@hkbu.edu.hk)

#### Table of Contents

|                                                                                                                                                     |     |
|-----------------------------------------------------------------------------------------------------------------------------------------------------|-----|
| 1. General information .....                                                                                                                        | s2  |
| 2. Preparation of alkenyl isoquinolines .....                                                                                                       | s2  |
| 3. A typical procedure for Cu(I)-catalyzed 1,4-conjugate hydrophosphination of alkenyl isoquinolines.....                                           | s9  |
| 4. Preparation of 4a, 7 and 8.....                                                                                                                  | s9  |
| 5. Characterization data ( <sup>1</sup> H NMR, <sup>13</sup> C NMR, <sup>31</sup> P NMR, <sup>19</sup> F NMR, HRMS, and HPLC) of the products ..... | s12 |
| 6. References .....                                                                                                                                 | s26 |
| 7. Crystal data and structure refinement of 3e .....                                                                                                | s26 |
| 8. Copies of <sup>1</sup> H NMR, <sup>13</sup> C NMR, <sup>19</sup> F NMR and HPLC spectra of the products.....                                     | s33 |

## 1. General information

All the air or moisture sensitive reactions and manipulations were performed under an atmosphere of argon by using standard Schlenk techniques and Drybox (Mikrouna, Supper 1220/750).  $^1\text{H}$  NMR and  $^{13}\text{C}$  NMR spectra were recorded on Bruker-Avance 400 or 500 MHz spectrometer.  $\text{CDCl}_3$  was used as solvent. Chemical shifts ( $\delta$ ) were reported in ppm with tetramethylsilane as internal standard, and  $J$  values were given in Hz. The following abbreviations were used to explain the multiplicities: s = singlet, d = doublet, dd = double of doublets, t = triplet, q = quartet, m = multiplet. Flash column chromatograph was carried out using 200-300 mesh silica gel at medium pressure. High resolution mass spectra (HRMS) were recorded on a LC-TOF spectrometer. ESI-HRMS data were acquired using a Thermo LTQ Orbitrap XL Instrument equipped with an ESI source. Optical rotation was obtained on a Rudolph Research Analytical (Atopol I). HPLC analysis was performed on Agilent 1260 series, UV detection monitored at 230 or 220 nm. Toluene, tetrahydrofuran, 1,4-dioxane and ethylene glycol dimethyl ether were dried and distilled before use according to the standard methods. Anisole was obtained from J&K Scientific. Melting points were measured on MP-450 (Hanon) melting point apparatus and uncorrected.

## 2. Preparation of alkenyl isoquinolines

*A general procedure for the synthesis of alkenyl isoquinolines 1a-e<sup>II</sup>, 1z and 1aa*

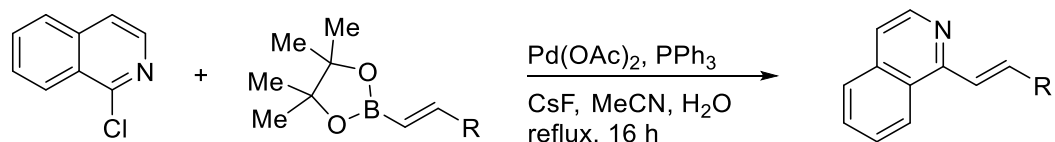

A solution of 1-chloroisoquinoline (818 mg, 5.00 mmol), alkenylboronic esters (5.50 mmol),  $\text{Pd}(\text{OAc})_2$  (56 mg, 0.25 mmol),  $\text{PPh}_3$  (262 mg, 1.00 mmol), and  $\text{CsF}$  (1.52 g, 10.0 mmol) in  $\text{MeCN}$  (80 mL) and  $\text{H}_2\text{O}$  (20 mL) was heated to reflux for 16 h. The mixture was cooled to room temperature, and partitioned between  $\text{CH}_2\text{Cl}_2$  (100 mL) and  $\text{H}_2\text{O}$  (50 mL). The aqueous layer was extracted with  $\text{CH}_2\text{Cl}_2$ , and the organic layer was washed with brine, dried over anhydrous  $\text{Na}_2\text{SO}_4$ , and evaporated. The residue was purified by column chromatography on silica gel to give desired products **1a-e**, **1z** and **1aa** in 46-87% yields.

### (*E*)-1-(hex-1-en-1-yl)isoquinoline 1a

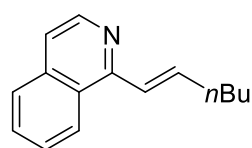

Light yellow oil, 46% yield;  $^1\text{H}$  NMR (500 MHz,  $\text{CDCl}_3$ ):  $\delta$  8.47 (d,  $J$  = 5.6 Hz, 1H), 8.25 (d,  $J$  = 8.4 Hz, 1H), 7.77 (d,  $J$  = 8.2 Hz, 1H), 7.65-7.62 (m, 1H), 7.58-7.55 (m, 1H), 7.50 (d,  $J$  = 5.6 Hz, 1H), 7.29-7.26 (m, 1H), 7.09-7.03 (m, 1H), 2.42-2.37 (m, 2H), 1.60-1.54 (m, 2H), 1.47-1.40 (m, 2H), 0.95 (t,  $J$  = 7.3 Hz, 3H).  $^{13}\text{C}$  NMR (125 MHz,  $\text{CDCl}_3$ ):  $\delta$  155.3, 142.3, 139.7, 136.6, 129.8, 127.1, 126.9, 126.2, 125.0, 124.8, 119.5, 33.1, 31.1, 22.4, 14.0. HRMS (ESI)  $m/z$ :

calcd for C<sub>15</sub>H<sub>18</sub>N [M+H]<sup>+</sup> 212.1434, found 212.1431.

**(E)-1-(pent-1-en-1-yl)isoquinoline 1b**

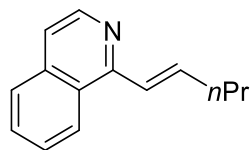

Light yellow oil, 87% yield; <sup>1</sup>H NMR (500 MHz, CDCl<sub>3</sub>): δ 8.47 (d, *J* = 5.6 Hz, 1H), 8.26-8.23 (m, 1H), 7.78-7.75 (m, 1H), 7.65-7.61 (m, 1H), 7.58-7.54 (m, 1H), 7.50-7.48 (m, 1H), 7.29-7.26 (m, 1H), 7.08-7.03 (m, 1H), 2.39-2.35 (m, 2H), 1.65-1.56 (m, 2H), 1.03-1.00 (m, 3H). <sup>13</sup>C NMR (125 MHz, CDCl<sub>3</sub>): δ 155.2, 142.3, 139.5, 136.6, 129.8, 127.1, 126.9, 126.2, 125.2, 124.8, 119.5, 35.5, 22.2, 13.9. HRMS (ESI) *m/z*: calcd for C<sub>14</sub>H<sub>16</sub>N [M+H]<sup>+</sup> 198.1277, found 198.1275.

**(E)-1-(hept-1-en-1-yl)isoquinoline 1c**

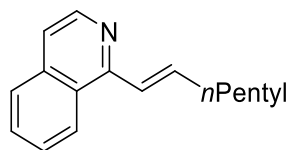

Yellow oil, 67% yield; <sup>1</sup>H NMR (500 MHz, CDCl<sub>3</sub>): δ 8.47 (d, *J* = 5.6 Hz, 1H), 8.25 (d, *J* = 8.5 Hz, 1H), 7.78 (d, *J* = 8.1 Hz, 1H), 7.66-7.64 (m, 1H), 7.59-7.55 (m, 1H), 7.50 (d, *J* = 5.6 Hz, 1H), 7.29-7.26 (m, 1H), 7.09-7.03 (m, 1H), 2.41-2.37 (m, 2H), 1.62-1.52 (m, 2H), 1.41-1.36 (m, 4H), 0.92 (t, *J* = 7.1 Hz, 3H). <sup>13</sup>C NMR (125 MHz, CDCl<sub>3</sub>): δ 155.3, 142.3, 139.8, 136.6, 129.8, 127.1, 126.9, 126.2, 125.0, 124.8, 119.4, 33.4, 31.6, 28.7, 22.6, 14.1. HRMS (ESI) *m/z*: calcd for C<sub>16</sub>H<sub>20</sub>N [M+H]<sup>+</sup> 226.1590, found 226.1587.

**(E)-1-(3-phenylprop-1-en-1-yl)isoquinoline 1d**

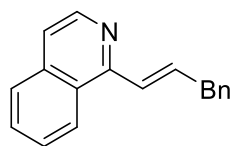

Yellow solid, 73% yield; m.p. 55-56 °C; <sup>1</sup>H NMR (500 MHz, CDCl<sub>3</sub>): δ 8.45 (d, *J* = 5.6 Hz, 1H), 8.17 (d, *J* = 8.4 Hz, 1H), 7.75 (d, *J* = 8.1 Hz, 1H), 7.62 (t, *J* = 7.0 Hz, 1H), 7.55-7.52 (m, 1H), 7.48 (d, *J* = 5.6 Hz, 1H), 7.33-7.29 (m, 4H), 7.26-7.17 (m, 3H), 3.71 (d, *J* = 6.5 Hz, 2H). <sup>13</sup>C NMR (125 MHz, CDCl<sub>3</sub>): δ 154.9, 142.4, 139.4, 137.7, 136.6, 129.8, 128.9, 128.6, 127.2, 127.1, 126.4, 126.3, 126.2, 124.7, 119.7, 39.6. HRMS (ESI) *m/z*: calcd for C<sub>18</sub>H<sub>16</sub>N [M+H]<sup>+</sup> 246.1277, found 246.1275.

**(E)-1-(2-cyclopropylvinyl)isoquinoline 1e**

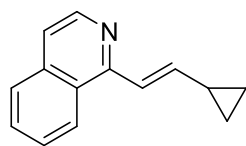

Light yellow solid, 73% yield; m.p. 63-64 °C; <sup>1</sup>H NMR (500 MHz, CDCl<sub>3</sub>): δ 8.43 (d, *J* = 5.6 Hz, 1H), 8.25 (d, *J* = 8.4 Hz, 1H), 7.75 (d, *J* = 8.1 Hz, 1H), 7.62 (t, *J* = 7.2 Hz, 1H), 7.55 (t, *J* = 8.1 Hz, 1H), 7.46 (d, *J* = 5.6 Hz, 1H), 7.39 (d, *J* = 15.0 Hz, 1H), 6.58 (dd, *J* = 15.0, 9.8 Hz, 1H), 1.80-1.1.73 (m, 1H), 0.95-0.91 (m, 2H), 0.72-0.69 (m, 2H). <sup>13</sup>C NMR (125 MHz, CDCl<sub>3</sub>): δ 154.8, 143.7, 142.3, 136.7, 129.7, 127.1, 126.9, 125.9, 124.7, 122.3, 119.2, 15.4, 8.1. HRMS (ESI) *m/z*: calcd for C<sub>14</sub>H<sub>14</sub>N [M+H]<sup>+</sup> 196.1121, found 196.1118.

**A general procedure for the synthesis of alkenyl quinolines 1f-u<sup>[2]</sup>**

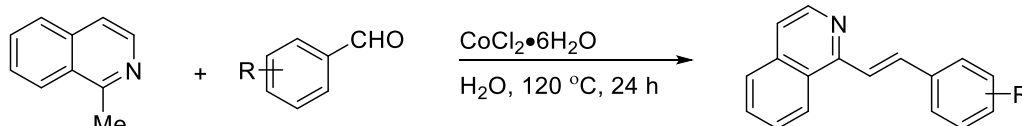

To a 50 mL screw-capped reaction vial equipped with a magnetic stir bar,  $\text{CoCl}_2 \cdot 6\text{H}_2\text{O}$  (1.0 mol%, 0.05 mmol, 13.7 mg), 1-methylisoquinoline (5 mmol, 0.76g), aldehyde (10 mmol) and  $\text{H}_2\text{O}$  (3 mL) were added. The resulting mixture was placed into a preheated oil bath at 120 °C with vigorous stirring. After 24 h, the reaction mixture was taken out of the oil bath, allowed to cool to room temperature and poured into  $\text{H}_2\text{O}$  (10 mL). The aqueous layer was then extracted with ethyl acetate (20 mL x 2). The organic layer was washed with brine (40 mL), dried over  $\text{Na}_2\text{SO}_4$  and solvent removed under reduced pressure. The residue was purified by column chromatography on silica gel to give the alkenylation products **1f-u**.

Alkenyl isoquinoline **1g**, **1h**, **1i**, **1j**, **1k** were known compounds.<sup>[3]</sup>

#### 1-((1*E*,3*E*)-4-phenylbuta-1,3-dien-1-yl)isoquinoline **1f**

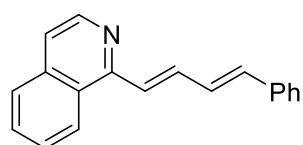

Light yellow solid, 73% yield; m.p. 120-121 °C;  $^1\text{H}$  NMR (500 MHz,  $\text{CDCl}_3$ ):  $\delta$  8.55 (d,  $J = 5.6$  Hz, 1H), 8.29 (d,  $J = 8.5$  Hz, 1H), 7.85-7.79 (m, 2H), 7.66 (t,  $J = 7.0$  Hz, 1H), 7.60 (t,  $J = 8.0$  Hz, 1H), 7.56 (d,  $J = 14.9$  Hz, 1H), 7.53-7.50 (m, 3H), 7.37 (t,  $J = 7.5$  Hz, 1H), 7.29-7.26 (m, 2H), 7.16 (dd,  $J = 15.5, 11.1$  Hz, 1H), 6.90 (d,  $J = 15.5$  Hz, 1H).  $^{13}\text{C}$  NMR (125 MHz,  $\text{CDCl}_3$ ):  $\delta$  154.5, 142.6, 137.1, 136.7, 136.5, 136.2, 129.9, 128.8, 128.1, 127.3, 127.2, 126.8, 126.6, 124.4, 119.8. HRMS (ESI)  $m/z$ : calcd for  $\text{C}_{19}\text{H}_{16}\text{N}$  [ $\text{M}+\text{H}$ ] $^+$  258.1277, found 258.1275.

#### (*E*)-1-(4-bromostyryl)isoquinoline **1l**

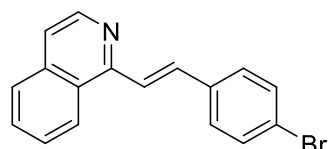

Light yellow solid, 40% yield; m.p. 135-136 °C;  $^1\text{H}$  NMR (500 MHz,  $\text{CDCl}_3$ ):  $\delta$  8.56 (d,  $J = 5.6$  Hz, 1H), 8.34 (d,  $J = 8.4$  Hz, 1H), 7.98 (d,  $J = 15.6$  Hz, 1H), 7.91 (d,  $J = 15.6$  Hz, 1H), 7.83 (d,  $J = 8.1$  Hz, 1H), 7.69 (t,  $J = 7.5$  Hz, 1H), 7.65-7.62 (m, 1H), 7.68-7.52 (m, 5H).  $^{13}\text{C}$  NMR (125 MHz,  $\text{CDCl}_3$ ):  $\delta$  154.2, 142.5, 136.8, 135.9, 134.5, 131.9, 130.0, 128.9, 127.4, 127.3, 126.8, 124.3, 123.5, 122.5, 120.2. HRMS (ESI)  $m/z$ : calcd for  $\text{C}_{17}\text{H}_{13}\text{BrN}$  [ $\text{M}+\text{H}$ ] $^+$  310.0226, found 310.0222.

#### (*E*)-1-(4-(trifluoromethoxy)styryl)isoquinoline **1m**

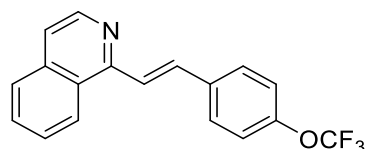

Light yellow solid, 64% yield; m.p. 100-101 °C;  $^1\text{H}$  NMR (500 MHz,  $\text{CDCl}_3$ ):  $\delta$  8.56 (d,  $J = 5.6$  Hz, 1H), 8.34 (d,  $J = 8.5$  Hz, 1H), 7.96 (s, 2H), 7.83 (d,  $J = 8.2$  Hz, 1H), 7.71-7.68 (m, 3H), 7.65-7.62 (m, 1H), 7.58 (d,  $J = 5.6$  Hz, 1H), 7.26 (d,  $J = 8.1$  Hz, 2H).  $^{13}\text{C}$  NMR (125 MHz,  $\text{CDCl}_3$ ):  $\delta$  154.1, 149.2 (d,  $J = 1.6$  Hz), 142.5, 136.8, 135.6, 134.2, 130.0, 128.7, 127.4 (d,  $J = 6.8$  Hz), 126.8, 124.3, 123.7, 123.6 (q,  $J = 256.1$  Hz), 121.2, 120.3, 119.5. HRMS (ESI)  $m/z$ : calcd for  $\text{C}_{18}\text{H}_{13}\text{F}_3\text{ON}$  [ $\text{M}+\text{H}$ ] $^+$  316.0944, found 316.0940.



**(E)-1-(4-(trifluoromethyl)styryl)isoquinoline 1n**

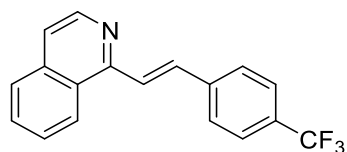

Light yellow solid, 74% yield; m.p. 118-119 °C; <sup>1</sup>H NMR (500 MHz, CDCl<sub>3</sub>): δ 8.56 (d, *J* = 5.6 Hz, 1H), 8.33 (d, *J* = 8.5 Hz, 1H), 8.01 (dd, *J* = 33.8, 15.6 Hz, 2H), 7.82 (d, *J* = 8.2 Hz, 1H), 7.75 (d, *J* = 8.0 Hz, 2H), 7.70-7.61 (m, 4H), 7.57 (d, *J* = 5.5 Hz, 1H). <sup>13</sup>C NMR (125 MHz, CDCl<sub>3</sub>): δ 153.8, 142.5, 140.3, 136.7, 134.1, 130.0, 129.9 (q, *J* = 270.3 Hz), 127.5, 127.44, 127.42, 126.8, 125.7 (q, *J* = 3.6 Hz), 125.2, 124.2, 120.6. HRMS (ESI) *m/z*: calcd for C<sub>18</sub>H<sub>13</sub>F<sub>3</sub>N [M+H]<sup>+</sup> 300.0995, found 300.0991.

**(E)-1-(2-([1,1'-biphenyl]-4-yl)vinyl)isoquinoline 1o**

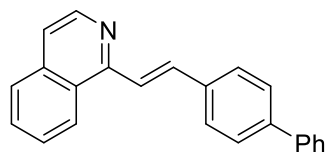

Light yellow solid, 65% yield; m.p. 143-144 °C; <sup>1</sup>H NMR (500 MHz, CDCl<sub>3</sub>): δ 8.58 (d, *J* = 5.6 Hz, 1H), 8.40 (d, *J* = 8.3 Hz, 1H), 8.05 (s, 2H), 7.84 (d, *J* = 7.9 Hz, 1H), 7.79 (d, *J* = 8.3 Hz, 2H), 7.71-7.63 (m, 6H), 7.57 (d, *J* = 5.6 Hz, 1H), 7.47 (t, *J* = 7.4 Hz, 2H), 7.38 (t, *J* = 7.4 Hz, 1H). <sup>13</sup>C NMR (125 MHz, CDCl<sub>3</sub>): δ 154.5, 142.5, 141.3, 140.6, 136.8, 136.0, 135.4, 130.0, 128.9, 127.9, 127.53, 127.48, 127.37, 127.2, 127.0, 126.8, 124.5, 122.8, 120.0. HRMS (ESI) *m/z*: calcd for C<sub>23</sub>H<sub>18</sub>N [M+H]<sup>+</sup> 308.1434, found 308.1429.

**(E)-1-(3-methylstyryl)isoquinoline 1p**

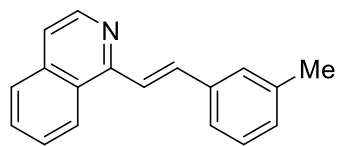

Light yellow solid, 54% yield; m.p. 101-102 °C; <sup>1</sup>H NMR (500 MHz, CDCl<sub>3</sub>): δ 8.57 (d, *J* = 5.6 Hz, 1H), 8.38 (d, *J* = 8.4 Hz, 1H), 8.02-7.95 (m, 2H), 7.82 (d, *J* = 8.1 Hz, 1H), 7.68 (t, *J* = 5.7 Hz, 1H), 7.62 (t, *J* = 8.2 Hz, 1H), 7.56 (d, *J* = 5.6 Hz, 1H), 7.53-7.50 (m, 2H), 7.32 (t, *J* = 7.6 Hz, 1H), 7.16 (d, *J* = 7.5 Hz, 1H), 2.42 (s, 3H). <sup>13</sup>C NMR (125 MHz, CDCl<sub>3</sub>): δ 154.6, 142.5, 138.3, 136.9, 136.8, 136.0, 129.9, 129.5, 128.7, 128.0, 127.3, 127.2, 126.8, 124.8, 124.5, 122.6, 119.9, 21.5. HRMS (ESI) *m/z*: calcd for C<sub>18</sub>H<sub>16</sub>N [M+H]<sup>+</sup> 246.1277, found 246.1274.

**(E)-1-(2-(naphthalen-2-yl)vinyl)isoquinoline 1q**

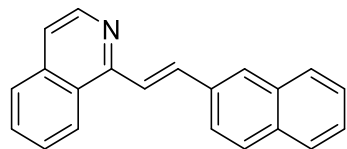

Light yellow solid, 61% yield; m.p. 209-210 °C; <sup>1</sup>H NMR (500 MHz, CDCl<sub>3</sub>): δ 8.59 (d, *J* = 5.5 Hz, 1H), 8.44 (d, *J* = 8.5 Hz, 1H), 8.15 (d, *J* = 3.9 Hz, 2H), 8.06 (s, 1H), 7.93-7.92 (m, 1H), 7.89-7.88 (m, 2H), 7.85 (d, *J* = 21.9 Hz, 2H), 7.72-7.51 (m, 1H), 7.68-7.64 (m, 1H), 7.58 (d, *J* = 5.6 Hz, 1H), 7.53-7.47 (m, 2H). <sup>13</sup>C NMR (125 MHz, CDCl<sub>3</sub>): δ 154.6, 142.5, 136.8, 135.9, 134.4, 133.7, 133.6, 130.0, 128.44, 128.36, 128.32, 127.8, 127.4, 127.3, 126.8, 126.5, 126.4, 124.5, 123.9, 123.1, 120.0. HRMS (ESI) *m/z*: calcd for C<sub>21</sub>H<sub>16</sub>N [M+H]<sup>+</sup> 282.1277, found 282.1273.

**(E)-1-(2-(furan-2-yl)vinyl)isoquinoline 1r**

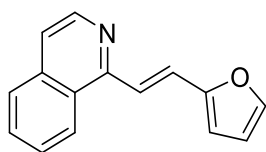

Yellow solid, 57% yield; m.p. 116-117 °C; <sup>1</sup>H NMR (500 MHz, CDCl<sub>3</sub>): δ 8.52 (d, *J* = 5.6 Hz, 1H), 8.40 (d, *J* = 8.4 Hz, 1H), 7.92 (d, *J* = 15.4 Hz, 1H), 7.82-7.78 (m, 2H), 7.66-7.63 (m, 1H), 7.51-7.58 (m, 1H), 7.52-7.49 (m, 2H), 6.54 (d, *J* = 3.3 Hz, 1H), 6.48-6.47 (m, 1H). <sup>13</sup>C NMR (125 MHz, CDCl<sub>3</sub>): δ 154.2, 153.2, 143.1, 142.5, 136.7, 129.9, 127.24, 127.17, 126.7, 124.4, 122.7, 120.7, 119.8, 112.1, 111.9. HRMS (ESI) *m/z*: calcd for C<sub>15</sub>H<sub>12</sub>NO [M+H]<sup>+</sup> 222.0913, found 222.0911.

**(E)-1-(2-(furan-3-yl)vinyl)isoquinoline 1s**

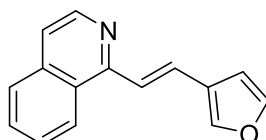

Gray solid, 45% yield; m.p. 85-86 °C; <sup>1</sup>H NMR (500 MHz, CDCl<sub>3</sub>): δ 8.52 (d, *J* = 5.6 Hz, 1H), 8.30 (d, *J* = 8.5 Hz, 1H), 7.87 (d, *J* = 15.5 Hz, 1H), 7.80 (d, *J* = 15.5 Hz, 1H), 7.70-7.64 (m, 3H), 7.59 (t, *J* = 8.1 Hz, 1H), 7.52 (d, *J* = 5.6 Hz, 1H), 7.47 (s, 1H), 6.81 (s, 1H). <sup>13</sup>C NMR (125 MHz, CDCl<sub>3</sub>): δ 154.6, 144.0, 143.0, 142.4, 136.7, 129.9, 127.3, 127.1, 126.5, 125.7, 124.5, 124.4, 122.5, 119.7, 107.5. HRMS (ESI) *m/z*: calcd for C<sub>15</sub>H<sub>12</sub>NO [M+H]<sup>+</sup> 222.0913, found 222.0911.

**(E)-1-(2-(thiophen-3-yl)vinyl)isoquinoline 1t**

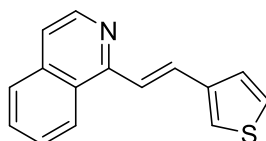

Light yellow solid, 62% yield; m.p. 115-116 °C; <sup>1</sup>H NMR (500 MHz, CDCl<sub>3</sub>): δ 8.54 (d, *J* = 5.6 Hz, 1H), 8.32 (d, *J* = 8.4 Hz, 1H), 7.99 (d, *J* = 15.5 Hz, 1H), 7.83-7.80 (m, 2H), 7.67 (t, *J* = 7.0 Hz, 1H), 7.61 (t, *J* = 7.1 Hz, 1H), 7.54 (d, *J* = 5.6 Hz, 1H), 7.51 (d, *J* = 5.1 Hz, 1H), 7.48 (d, *J* = 2.5 Hz, 1H), 7.37-7.36 (m, 1H). <sup>13</sup>C NMR (125 MHz, CDCl<sub>3</sub>): δ 154.6, 142.5, 139.9, 136.7, 129.9, 129.8, 127.3, 127.1, 126.6, 126.4, 125.2, 125.1, 124.4, 122.6, 119.8. HRMS (ESI) *m/z*: calcd for C<sub>15</sub>H<sub>12</sub>NS [M+H]<sup>+</sup> 238.0685, found 238.0682.

**(E)-1-(2-(pyridin-3-yl)vinyl)isoquinoline 1u**

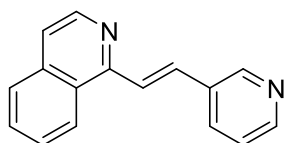

White solid, 75% yield; m.p. 123-124 °C; <sup>1</sup>H NMR (500 MHz, CDCl<sub>3</sub>): δ 8.90 (s, 1H), 8.56-8.54 (m, 2H), 8.32 (d, *J* = 8.2 Hz, 1H), 8.05-8.02 (m, 1H), 7.98-7.93 (m, 2H), 7.82 (d, *J* = 7.8 Hz, 1H), 7.68 (t, *J* = 6.9 Hz, 1H), 7.63-7.61 (m, 1H), 7.58-7.57 (m, 1H), 7.33-7.31 (m, 1H). <sup>13</sup>C NMR (125 MHz, CDCl<sub>3</sub>): δ 153.7, 149.4, 149.2, 142.5, 136.7, 133.7, 132.6, 132.1, 130.1, 127.5, 127.4, 126.7, 124.7, 124.2, 123.7, 120.5. HRMS (ESI) *m/z*: calcd for C<sub>16</sub>H<sub>13</sub>N<sub>2</sub> [M+H]<sup>+</sup> 233.1073, found 233.1071.

### Synthesis of alkenyl isoquinolines **1v-w**

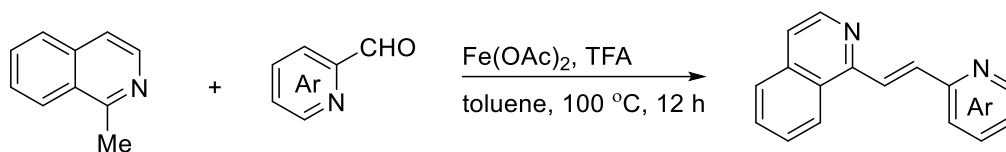

A 50 mL Schlenk tube was charged with  $\text{Fe}(\text{OAc})_2$  (0.5 mmol, 58 mg) in toluene (10 mL), followed by the addition of 1-methylisoquinoline (5 mmol, 0.76 g), aldehyde (7.5 mmol) and  $\text{CF}_3\text{COOH}$  (0.5 mmol, 57 mg). The reaction was carried out at 100 °C for 12 h. The mixture was cooled to room temperature and diluted with EtOAc (30 mL) and  $\text{H}_2\text{O}$  (30 mL). The aqueous layer was extracted with EtOAc (30 mL x 2). The organic layer was washed with brine, dried over anhydrous  $\text{Na}_2\text{SO}_4$ , filtered, and concentrated under vacuum. The residue was purified by column chromatography on silica gel to get alkenyl isoquinolines **1v-w**.

Alkenyl isoquinoline **1v** was known compound.<sup>[3]</sup>

#### (*E*)-1-(2-(pyridin-4-yl)vinyl)isoquinoline **1w**

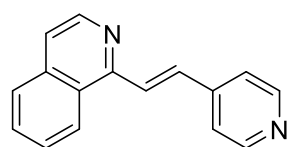

Yellow solid, 76% yield; m.p. 125-126 °C;  $^1\text{H}$  NMR (500 MHz,  $\text{CDCl}_3$ ):  $\delta$  8.62-8.61 (m, 2H), 8.55 (d,  $J = 8.5$  Hz, 1H), 8.31 (d,  $J = 8.4$  Hz, 1H), 8.13 (d,  $J = 15.6$  Hz, 1H), 7.86 (d,  $J = 15.6$  Hz, 1H), 7.81 (d,  $J = 8.2$  Hz, 1H), 7.69-7.66 (m, 1H), 7.63-7.58 (m, 2H), 7.49-7.48 (m, 2H).  $^{13}\text{C}$  NMR (125 MHz,  $\text{CDCl}_3$ ):  $\delta$  153.3, 150.3, 144.1, 142.5, 136.7, 133.0, 130.1, 127.6, 127.5, 127.1, 126.9, 124.1, 121.5, 120.9. HRMS (ESI)  $m/z$ : calcd for  $\text{C}_{16}\text{H}_{13}\text{N}_2$  [ $\text{M}+\text{H}$ ] $^+$  233.1073, found 233.1071.

### Synthesis of alkenyl isoquinolines **1ab-ah**<sup>[4]</sup>

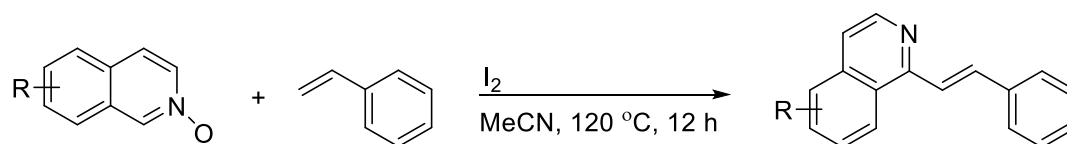

The quinoline N-oxide (5 mmol), styrene (1.04g, 10 mmol,) and  $\text{I}_2$  (126.9 mg, 1 mmol) in 3 mL MeCN were stirred in a dry reaction tube at 120 °C under air atmosphere. The reaction mixture was stirred for 12 h. When the reaction was completed, the crude mixture was cooled to room temperature and concentrated under vacuum. The residue was purified by column chromatography on silica gel to get alkenyl isoquinolines **1ab-ah**.

Alkenyl isoquinoline **1ae** and **1ag** were known compounds.<sup>[3]</sup>

#### (*E*)-4-methyl-1-styrylisoquinoline **1ab**

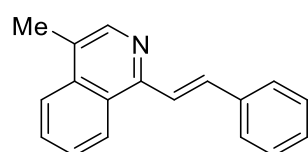

Light yellow solid, 45% yield; m.p. 107-108 °C;  $^1\text{H}$  NMR (500 MHz,  $\text{CDCl}_3$ ):  $\delta$  8.42 (s, 1H), 8.38 (d,  $J = 8.5$  Hz, 1H), 8.02-7.90 (m, 3H), 7.74-7.69 (m, 3H), 7.62 (t,  $J = 8.1$  Hz, 1H), 7.42 (t,  $J = 7.4$  Hz, 2H), 7.33 (t,  $J = 7.4$  Hz, 1H), 2.63 (s, 3H).  $^{13}\text{C}$  NMR (125

MHz, CDCl<sub>3</sub>):  $\delta$  153.1, 142.5, 137.1, 136.0, 135.0, 129.7, 128.8, 128.4, 127.4, 126.8, 126.6, 126.2, 124.9, 123.8, 123.1, 16.3. HRMS (ESI)  $m/z$ : calcd for C<sub>18</sub>H<sub>16</sub>N [M+H]<sup>+</sup> 246.1277, found 246.1274.

**(E)-4-bromo-1-styrylisoquinoline 1ac**

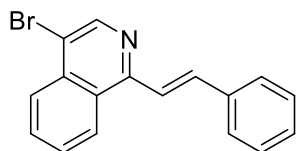

Light yellow solid, 35% yield; m.p. 94-95 °C; <sup>1</sup>H NMR (500 MHz, CDCl<sub>3</sub>):  $\delta$  8.73-8.72 (m, 1H), 8.35-8.3 (m, 1H), 8.19-8.17 (m, 1H), 8.00-7.90 (m, 2H), 7.80-7.77 (m, 1H), 7.70-7.65 (m, 3H), 7.424 (t,  $J$  = 7.4 Hz, 1H), 7.36 (t,  $J$  = 7.3 Hz, 2H). <sup>13</sup>C NMR (125 MHz, CDCl<sub>3</sub>):  $\delta$  154.0, 144.2, 136.7, 136.6, 135.2, 131.1, 128.9, 128.8, 128.1, 127.8, 127.5, 126.6, 124.8, 122.1, 118.3. HRMS (ESI)  $m/z$ : calcd for C<sub>17</sub>H<sub>13</sub>BrN [M+H]<sup>+</sup> 310.0226, found 310.0222.

**(E)-5-methyl-1-styrylisoquinoline 1ad**

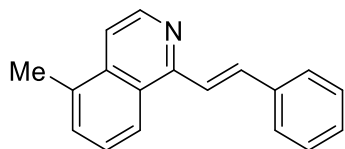

Light yellow solid, 52% yield; m.p. 103-104 °C; <sup>1</sup>H NMR (500 MHz, CDCl<sub>3</sub>):  $\delta$  8.51 (d,  $J$  = 5.6 Hz, 1H), 8.24 (d,  $J$  = 8.7 Hz, 1H), 7.98 (s, 2H), 7.71-7.70 (m, 2H), 7.58 (s, 1H), 7.48-7.40 (m, 4H), 7.36-7.32 (m, 1H), 2.54 (s, 3H). <sup>13</sup>C NMR (125 MHz, CDCl<sub>3</sub>):  $\delta$  154.2, 142.6, 140.2, 137.1, 137.0, 135.6, 129.5, 128.8, 128.6, 127.4, 126.2, 125.2, 124.3, 123.0, 119.6, 21.9. HRMS (ESI)  $m/z$ : calcd for C<sub>18</sub>H<sub>16</sub>N [M+H]<sup>+</sup> 246.1277, found 246.1274.

**(E)-6-methoxy-1-styrylisoquinoline 1af**

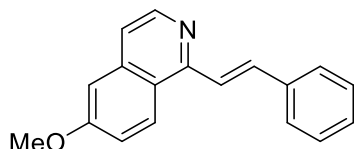

Yellow solid, 50% yield; m.p. 101-102 °C; <sup>1</sup>H NMR (500 MHz, CDCl<sub>3</sub>):  $\delta$  8.49 (d,  $J$  = 5.6 Hz, 1H), 8.26 (d,  $J$  = 9.3 Hz, 1H), 7.93 (d,  $J$  = 4.5 Hz, 2H), 7.68 (d,  $J$  = 7.5 Hz, 2H), 7.46 (d,  $J$  = 7.5 Hz, 1H), 7.41 (t,  $J$  = 7.4 Hz, 2H), 7.33 (t,  $J$  = 7.3 Hz, 1H), 7.25-7.23 (m, 1H), 7.06-7.05 (m, 1H), 3.94 (s, 3H). <sup>13</sup>C NMR (125 MHz, CDCl<sub>3</sub>):  $\delta$  160.5, 153.9, 143.0, 138.9, 136.9, 135.7, 128.8, 128.6, 127.4, 126.4, 122.9, 122.5, 120.1, 119.4, 104.7, 55.5. HRMS (ESI)  $m/z$ : calcd for C<sub>18</sub>H<sub>16</sub>NO [M+H]<sup>+</sup> 262.1226, found 262.1224.

**(E)-6-bromo-1-styrylisoquinoline 1ah**

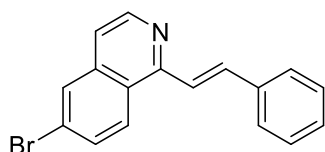

Light yellow solid, 42% yield; m.p. 96-97 °C; <sup>1</sup>H NMR (500 MHz, CDCl<sub>3</sub>):  $\delta$  8.57 (d,  $J$  = 5.6 Hz, 1H), 8.21 (d,  $J$  = 9.0 Hz, 1H), 8.00-7.97 (m, 2H), 7.90 (d,  $J$  = 15.6 Hz, 1H), 7.70-7.67 (m, 3H), 7.45 (d,  $J$  = 5.6 Hz, 1H), 7.43-7.40 (m, 2H), 7.37-7.34 (m, 1H). <sup>13</sup>C NMR (125 MHz, CDCl<sub>3</sub>):  $\delta$  154.8, 143.6, 137.9, 136.7, 136.6, 130.7, 129.4, 128.9, 128.8, 127.5, 126.3, 125.1, 124.7, 122.2, 118.8. HRMS (ESI)  $m/z$ : calcd for C<sub>17</sub>H<sub>13</sub>BrN [M+H]<sup>+</sup> 310.0226, found 310.0222.

### 3. A typical procedure for Cu(I)-catalyzed 1,4-conjugate hydrophosphination of alkenyl isoquinolines

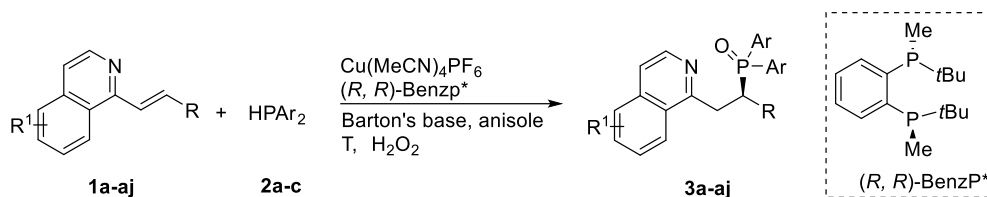

In an argon-filled glovebox, a flame-dried screw-cap reaction tube equipped with a magnetic stir bar was charged with  $\text{Cu(MeCN)}_4\text{PF}_6$  (0.02 mmol, 7.4 mg) and  $(R,R)\text{-BenzP}^*$  (0.022 mmol, 6.2 mg). Anisole (1 mL) was added, then the mixture was stirred at room temperature for 15 min. Alkenyl isoquinolines **1** (0.20 mmol), Barton's base (0.3 mmol) and diarylphosphines **2** (0.3 mmol) were added. The Schleck reaction vial was sealed with a rubber plug and taken out glovebox. The resulting solution was allowed to stir at 0°C or room temperature. When the reaction completed (monitored by TLC), the reaction mixture was quenched by 30%  $\text{H}_2\text{O}_2$  aqueous solution (100  $\mu\text{L}$ ) and was stirred for additional 20 minutes at room temperature. The organic solvent was removed and the residue was purified by column chromatography to give hydrophosphination products. The ee values of **3** were determined by HPLC.

Other diarylphosphines tried:

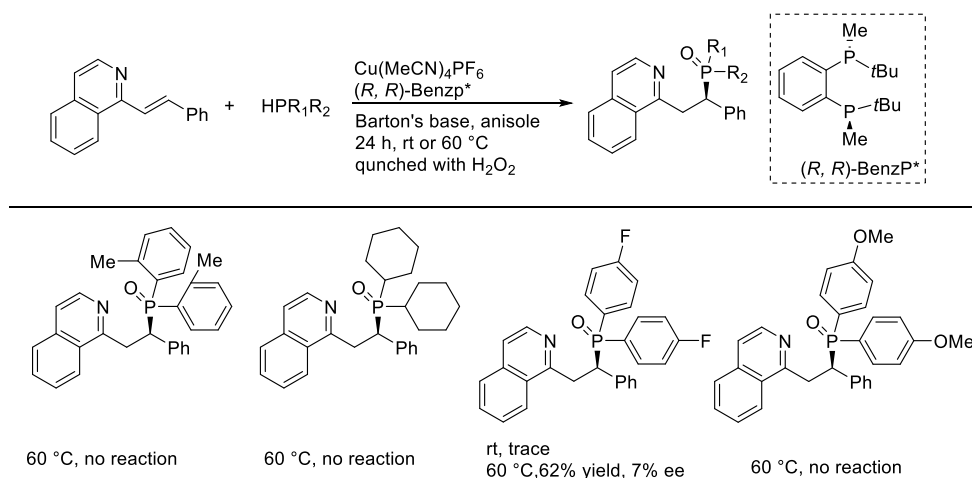

### 4. Preparation of 4a, 7 and 8

**Preparation of 4a:** performed by the procedure of Masahiro Terada and coworkers.<sup>[5]</sup>

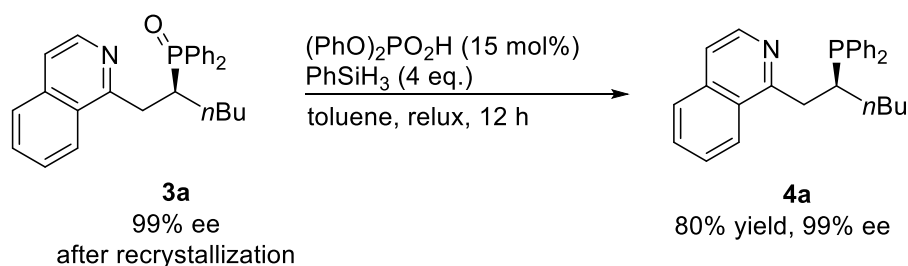

To a solution of **3a** (82.6 mg, 0.2 mmol) and diphenyl phosphate (7.6 mg, 0.03 mmol) in toluene (2.0 mL) were added phenylsilane (86.6 mg, 0.8 mmol). The reaction mixture was degassed under an argon atmosphere and refluxed using a heating mantle for 12 h. After the resulting mixture was cooled to room temperature, the resulting mixture was directly passed through flash column chromatography to give **4a** as a colorless oil. The enantiomeric excess was determined by HPLC analysis (the corresponding oxidized compound **3a**).

**(S)-1-(2-(diphenylphosphaneyl)hexyl)isoquinoline 4a**

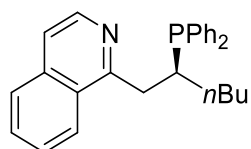

Colorless oil, 80% yield;  $[\alpha]_D^{20} = 18.0$  ( $c = 0.4$ ,  $\text{CHCl}_3$ );  $^1\text{H NMR}$  (500 MHz,  $\text{CDCl}_3$ ):  $\delta$  8.48 (d,  $J = 5.6$  Hz, 1H), 7.83 (d,  $J = 8.5$  Hz, 1H), 7.79 (d,  $J = 8.1$  Hz, 1H), 7.69-7.62 (m, 5H), 7.51-7.47 (m, 2H), 7.40-7.34 (m, 3H), 7.32-7.29 (m, 3H), 3.45-3.32 (m, 2H), 3.30-3.25 (m, 1H), 1.62-31.44 (m, 2H), 1.42-1.33 (m, 1H), 1.29-1.20 (m, 1H), 1.15-1.07 (m, 2H), 0.71 (t,  $J = 7.3$  Hz, 3H).  $^{13}\text{C NMR}$  (125 MHz,  $\text{CDCl}_3$ ):  $\delta$  160.8 (d,  $J = 10.7$  Hz), 141.8, 137.2 (d,  $J = 14.0$  Hz), 137.1 (d,  $J = 15.3$  Hz), 136.1, 134.1, 134.0, 133.8 (d,  $J = 19.0$  Hz), 129.6, 128.8 (d,  $J = 10.0$  Hz), 128.4 (d,  $J = 6.6$  Hz), 128.3 (d,  $J = 7.2$  Hz), 127.4, 127.3, 126.8, 125.1, 119.3, 36.2 (d,  $J = 16.5$  Hz), 35.5 (d,  $J = 12.7$  Hz), 30.7 (d,  $J = 13.5$  Hz), 29.5 (d,  $J = 10.8$  Hz), 22.9, 13.8.  $^{31}\text{P NMR}$  (200 MHz,  $\text{CDCl}_3$ ):  $\delta$  -3.8; HRMS (ESI)  $m/z$ : calcd for  $\text{C}_{27}\text{H}_{29}\text{NP}$   $[\text{M}+\text{H}]^+$  398.2032, found 398.2026.

**The use of ligand 4a in Pd-catalyzed asymmetric allylic etherification**

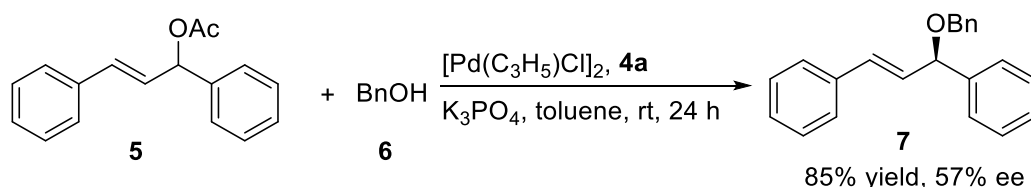

A dried 10 mL Schlenk tube equipped with a magnetic stirring bar was charged with  $[\text{Pd}(\text{C}_3\text{H}_5)\text{Cl}]_2$  (1.8 mg, 0.005 mmol) and ligand **4a** (6.0 mg, 0.015 mmol) in a glove box under Ar atmosphere. Anhydrous toluene (1 mL) was added, then the mixture was stirred at room temperature for 20 min. (*E*)-1,3-diphenylallyl acetate **5** (50.4 mg, 0.20 mmol),  $\text{K}_3\text{PO}_4$  (63.7 mg, 0.3 mmol) and benzyl alcohol **6** (32.4 mg, 0.3 mmol) were added. The Schleck reaction vial was sealed with a rubber plug and taken out glovebox. The resulting solution was allowed to stir at room temperature for 24 h. The reaction mixture was diluted with ethyl acetate (10 mL) and water (10 mL). The aqueous layer was extracted with EtOAc (10 mL x 2). The organic layer was washed with brine, dried over anhydrous  $\text{Na}_2\text{SO}_4$ , filtered, and concentrated under vacuum. After removal of the solvent, the crude mixture was purified by column chromatography affording the product **7**. The ee value of **7** was determined by HPLC.

**(R, E)-3-(benzyloxy)prop-1-ene-1,3-diyl dibenzene 7<sup>[5]</sup>**

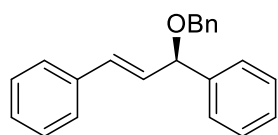

85% yield; *ee* was determined to be 57% by HPLC analysis with a Chiralcel OJ-H column (hexane/2-propanol 96:4, 1.0 mL/min, 254 nm);  $t_r$  (minor) = 15.45 min,  $t_r$  (major) = 17.93 min.

**Preparation of 8:**

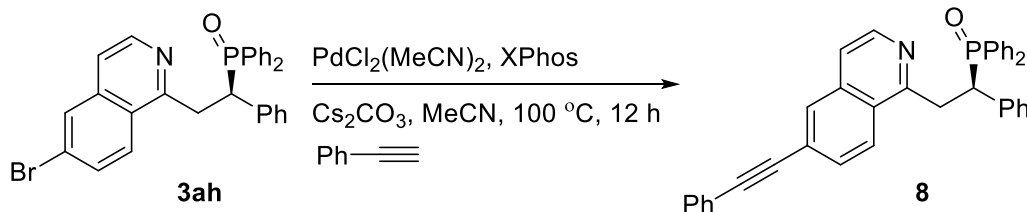

An oven-dried 10 mL screw-cap reaction tube with magnetic stir bar was charged with Pd(MeCN)<sub>2</sub>Cl<sub>2</sub> (1.3 mg, 5 mol %), XPhos (7.2 mg, 15 mol %), Cs<sub>2</sub>CO<sub>3</sub> (81.5 mg, 2.5 equiv), **3ah** (36.3 mg, 0.10 mmol), phenylacetylene (14  $\mu$ L, 1.3 equiv) and MeCN (1 mL, 0.1 M) under argon. The mixture was then stirred vigorously at 100 °C for 12 h. After completion (monitored by TLC), the reaction mixture was diluted with ethyl acetate (5 mL), then passing through a short pad of silica gel layer and eluted with ethyl acetate (20 mL). After removal of the solvent, the crude mixture was purified by column chromatography affording the product **8**.

**(R)-diphenyl(1-phenyl-2-(6-(phenylethynyl)isoquinolin-1-yl)ethyl)phosphine oxide 8**

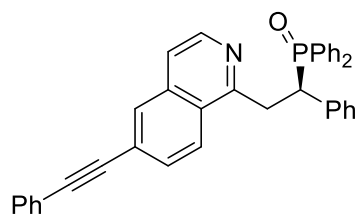

Yellow solid, 89% yield;  $[\alpha]^{20}_D = 44.4$  ( $c = 0.6$ , CHCl<sub>3</sub>); *ee* was determined to be 82% by HPLC analysis with a Chiralcel IC column (hexane/2-propanol 75:25, 1.0 mL/min, 220 nm);  $t_r$  (major) = 14.71 min,  $t_r$  (minor) = 17.32 min; <sup>1</sup>H NMR (500 MHz, CDCl<sub>3</sub>):  $\delta$  8.38 (d,  $J = 5.7$  Hz, 1H), 8.05-7.99 (m, 3H), 7.83 (s, 1H), 7.57-7.54 (m, 3H), 7.53-7.49 (m, 2H), 7.45-7.42 (m, 3H), 7.38-7.36 (m, 5H), 7.32-7.29 (m, 2H), 7.24-7.21 (m, 2H), 7.04 (t,  $J = 7.2$  Hz, 2H), 7.01-6.98 (m, 1H), 4.81-4.77 (m, 1H), 4.19-4.12 (m, 1H), 3.87-3.81 (m, 1H). <sup>13</sup>C NMR (125 MHz, CDCl<sub>3</sub>):  $\delta$  158.2 (d,  $J = 11.8$  Hz), 142.2, 136.2 (d,  $J = 5.3$  Hz), 135.7, 132.6 (d,  $J = 161.2$  Hz), 131.8 (d,  $J = 55.8$  Hz), 131.7, 131.6 (d,  $J = 2.4$  Hz), 131.3 (d,  $J = 8.9$  Hz), 131.22 (d,  $J = 2.6$  Hz), 131.0 (d,  $J = 8.9$  Hz), 130.1, 130.0 (d,  $J = 2.6$  Hz), 129.6, 128.8, 128.7 (d,  $J = 11.6$  Hz), 128.5, 128.1 (d,  $J = 11.7$  Hz), 128.0 (d,  $J = 1.5$  Hz), 126.8 (d,  $J = 1.6$  Hz), 126.4, 125.2, 124.8, 125.2, 124.8, 122.7, 119.0, 91.8, 88.7, 45.0 (d,  $J = 68.1$  Hz), 33.8. <sup>31</sup>P NMR (200 MHz, CDCl<sub>3</sub>):  $\delta$  34.2; HRMS (ESI)  $m/z$ : calcd for C<sub>27</sub>H<sub>29</sub>NP [M+H]<sup>+</sup> 534.1981, found 534.1979.

## 5. Characterization data (<sup>1</sup>H NMR, <sup>13</sup>C NMR, <sup>31</sup>P NMR, <sup>19</sup>F NMR, HRMS, and HPLC) of the products

### (S)-(1-(isoquinolin-1-yl)hexan-2-yl)diphenylphosphine oxide 3a

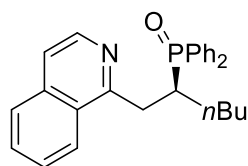

White solid, 94% yield; m.p. 95-96 °C;  $[\alpha]^{20}_{\text{D}} = 5.2$  ( $c = 0.6$ ,  $\text{CHCl}_3$ );  $ee$  was determined to be 90% by HPLC analysis with a Chiralcel IC column (hexane/2-propanol 70:30, 1.0 mL/min, 220 nm);  $t_{\text{r}}$  (major) = 11.43 min,  $t_{\text{r}}$  (minor) = 20.05 min; <sup>1</sup>H NMR (500 MHz,  $\text{CDCl}_3$ ):  $\delta$  8.41 (d,  $J = 5.7$  Hz, 1H), 8.11 (d,  $J = 8.5$  Hz, 1H), 7.92-7.88 (m, 2H), 7.79-7.75 (m, 2H), 7.71 (d,  $J = 8.2$  Hz, 1H), 7.60 (t,  $J = 7.0$  Hz, 1H), 7.52 (t,  $J = 8.1$  Hz, 1H), 7.47-7.44 (m, 3H), 7.42 (d,  $J = 5.7$  Hz, 1H), 7.24-7.18 (m, 3H), 3.69-3.63 (m, 2H), 3.57-3.50 (m, 1H), 1.80-1.71 (m, 1H), 1.65-1.59 (m, 1H), 1.17-1.12 (m, 1H), 1.10-0.98 (m, 3H), 0.58 (t,  $J = 7.1$  Hz, 3H). <sup>13</sup>C NMR (125 MHz,  $\text{CDCl}_3$ ):  $\delta$  159.1 (d,  $J = 10.8$  Hz), 141.4, 136.0, 133.5 (d,  $J = 56.7$  Hz), 132.7 (d,  $J = 56.1$  Hz), 131.4, 131.3, 131.1, 131.0, 130.9 (d,  $J = 8.5$  Hz), 130.8 (d,  $J = 8.8$  Hz), 129.8, 128.6 (d,  $J = 11.4$  Hz), 128.2 (d,  $J = 11.2$  Hz), 127.3, 127.1 (d,  $J = 8.3$  Hz), 125.0, 119.5, 35.5 (d,  $J = 71.2$  Hz), 32.0, 30.8, 21.0 (d,  $J = 9.2$  Hz), 14.2. <sup>31</sup>P NMR (200 MHz,  $\text{CDCl}_3$ ):  $\delta$  37.0; HRMS (ESI)  $m/z$ : calcd for  $\text{C}_{27}\text{H}_{29}\text{NOP}$   $[\text{M}+\text{H}]^+$  414.1981, found 414.1975.

### (S)-(1-(isoquinolin-1-yl)pentan-2-yl)diphenylphosphine oxide 3b

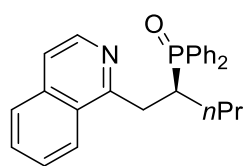

Colorless oil, 96% yield;  $[\alpha]^{20}_{\text{D}} = 4.7$  ( $c = 0.6$ ,  $\text{CHCl}_3$ );  $ee$  was determined to be 86% by HPLC analysis with a Chiralcel IC column (hexane/2-propanol 70:30, 0.5 mL/min, 220 nm);  $t_{\text{r}}$  (major) = 11.84 min,  $t_{\text{r}}$  (minor) = 22.47 min; <sup>1</sup>H NMR (500 MHz,  $\text{CDCl}_3$ ):  $\delta$  8.39 (d,  $J = 5.7$  Hz, 1H), 8.07 (d,  $J = 8.5$  Hz, 1H), 7.91-7.87 (m, 2H), 7.79-7.75 (m, 2H), 7.67 (d,  $J = 8.1$  Hz, 1H), 7.57-7.54 (m, 1H), 7.49-7.40 (m, 4H), 7.39 (d,  $J = 5.7$  Hz, 1H), 7.22-7.16 (m, 3H), 3.74-3.68 (m, 1H), 3.67-3.60 (m, 1H), 3.56-3.49 (m, 1H), 1.77-1.68 (m, 1H), 1.67-1.57 (m, 1H), 1.23-1.14 (m, 1H), 1.11-1.03 (m, 1H), 0.61 (t,  $J = 7.3$  Hz, 3H). <sup>13</sup>C NMR (125 MHz,  $\text{CDCl}_3$ ):  $\delta$  159.0 (d,  $J = 10.6$  Hz), 141.4, 136.0, 133.4 (d,  $J = 55.9$  Hz), 132.7 (d,  $J = 55.2$  Hz), 131.4, 131.3, 131.1 (d,  $J = 2.6$  Hz), 130.8 (d,  $J = 8.5$  Hz), 129.8, 128.6 (d,  $J = 13.4$  Hz), 128.2 (d,  $J = 11.4$  Hz), 127.3, 127.1 (d,  $J = 8.1$  Hz), 125.1, 119.4, 35.8 (d,  $J = 71.0$  Hz), 31.9, 29.8 (d,  $J = 8.9$  Hz), 28.2, 22.6, 13.6. <sup>31</sup>P NMR (200 MHz,  $\text{CDCl}_3$ ):  $\delta$  37.2; HRMS (ESI)  $m/z$ : calcd for  $\text{C}_{26}\text{H}_{27}\text{NOP}$   $[\text{M}+\text{H}]^+$  400.1825, found 400.1819.

### (S)-(1-(isoquinolin-1-yl)heptan-2-yl)diphenylphosphine oxide 3c

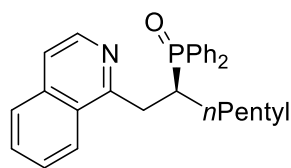

Light yellow oil, 95% yield; m.p. 95-96 °C;  $[\alpha]^{20}_{\text{D}} = 6.2$  ( $c = 0.4$ ,  $\text{CHCl}_3$ );  $ee$  was determined to be 84% by HPLC analysis with a Chiralcel IC column (hexane/2-propanol 70:30, 1.0 mL/min, 220 nm);  $t_{\text{r}}$  (major) = 11.52 min,  $t_{\text{r}}$  (minor) = 21.08 min; <sup>1</sup>H NMR (500 MHz,  $\text{CDCl}_3$ ):  $\delta$  8.40 (d,  $J = 5.7$  Hz, 1H), 8.11 (d,  $J = 8.4$  Hz, 1H), 7.91-7.787 (m, 2H), 7.78-



7.45 (m, 2H), 7.70 (d,  $J = 8.0$  Hz, 1H), 7.59 (t,  $J = 7.1$  Hz, 1H), 7.51 (t,  $J = 7.8$  Hz, 1H), 7.46-7.43 (m, 3H), 7.41 (d,  $J = 5.7$  Hz, 1H), 7.24-7.18 (m, 3H), 3.67-3.61 (m, 2H), 3.57-3.50 (m, 1H), 1.79-1.69 (m, 1H), 1.66-1.57 (m, 1H), 1.17-1.10 (m, 1H), 1.05-0.94 (m, 5H), 0.62 (t,  $J = 6.5$  Hz, 3H).  $^{13}\text{C}$  NMR (125 MHz,  $\text{CDCl}_3$ ):  $\delta$  159.1 (d,  $J = 10.8$  Hz), 141.4, 136.0, 133.2 (d,  $J = 56.2$  Hz), 132.5 (d,  $J = 52.8$  Hz), 131.5 (d,  $J = 2.5$  Hz), 131.1 (d,  $J = 2.5$  Hz), 131.0 (d,  $J = 8.0$  Hz), 130.8 (d,  $J = 8.7$  Hz), 129.8, 128.6 (d,  $J = 11.1$  Hz), 128.2 (d,  $J = 11.1$  Hz), 127.3, 127.2 (d,  $J = 2.5$  Hz), 125.1, 119.5, 35.9 (d,  $J = 71.9$  Hz), 31.9, 31.6, 28.5, 27.4 (d,  $J = 9.1$  Hz), 22.1, 13.8.  $^{31}\text{P}$  NMR (200 MHz,  $\text{CDCl}_3$ ):  $\delta$  37.5; HRMS (ESI)  $m/z$ : calcd for  $\text{C}_{28}\text{H}_{31}\text{NOP}$   $[\text{M}+\text{H}]^+$  428.2138, found 428.2131.

**(S)- (1-(isoquinolin-1-yl)-3-phenylpropan-2-yl)diphenylphosphine oxide 3d**

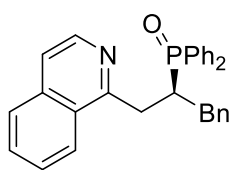

Yellow oil, 80% yield;  $[\alpha]_D^{20} = 4.5$  ( $c = 0.4$ ,  $\text{CHCl}_3$ );  $ee$  was determined to be 80% by HPLC analysis with a Chiralcel OD-H column (hexane/2-propanol 95:5, 1.0 mL/min, 230 nm);  $t_r$  (minor) = 8.39 min,  $t_r$  (major) = 12.42 min;  $^1\text{H}$  NMR (500 MHz,  $\text{CDCl}_3$ ):  $\delta$  8.27 (d,  $J = 5.8$  Hz, 1H), 7.97 (d,  $J = 8.6$  Hz, 1H), 7.89-7.85 (m, 2H), 7.77-7.74 (m, 2H), 7.61 (d,  $J = 8.1$  Hz, 1H), 7.53 (t,  $J = 7.3$  Hz, 1H), 7.45 (t,  $J = 8.1$  Hz, 1H), 7.41-7.35 (m, 3H), 7.27 (d,  $J = 5.7$  Hz, 1H), 7.18-7.12 (m, 3H), 6.99-6.88 (m, 5H), 4.16-4.10 (m, 1H), 3.68-2.3.61 (m, 1H), 3.58-3.51 (m, 1H), 3.18-3.12 (m, 1H), 2.99-2.92 (m, 1H).  $^{13}\text{C}$  NMR (125 MHz,  $\text{CDCl}_3$ ):  $\delta$  158.6 (d,  $J = 8.9$  Hz), 141.2, 139.1 (d,  $J = 10.2$  Hz), 135.8, 133.0 (d,  $J = 47.4$  Hz), 132.3 (d,  $J = 47.1$  Hz), 131.4 (d,  $J = 2.5$  Hz), 131.0 (d,  $J = 2.5$  Hz), 130.9, 130.8, 130.7, 130.6, 129.7, 129.0, 128.6 (d,  $J = 11.7$  Hz), 128.1 (d,  $J = 11.7$  Hz), 127.9, 127.0 (d,  $J = 14.2$  Hz), 125.8, 125.0, 119.3, 37.8 (d,  $J = 71.7$  Hz), 34.2, 31.5.  $^{31}\text{P}$  NMR (200 MHz,  $\text{CDCl}_3$ ):  $\delta$  36.2; HRMS (ESI)  $m/z$ : calcd for  $\text{C}_{30}\text{H}_{27}\text{NOP}$   $[\text{M}+\text{H}]^+$  448.1825, found 448.1830.

**(R)- (1-cyclopropyl-2-(isoquinolin-1-yl)ethyl)diphenylphosphine oxide 3e**

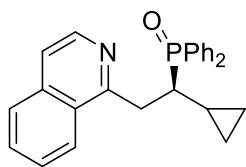

White solid, 92% yield; m.p. 148-149 °C;  $[\alpha]_D^{20} = 4.7$  ( $c = 1.21$ ,  $\text{CHCl}_3$ );  $ee$  was determined to be 82% by HPLC analysis with a Chiralcel IC column (hexane/2-propanol 70:30, 0.5 mL/min, 220 nm);  $t_r$  (major) = 34.97 min,  $t_r$  (minor) = 38.23 min;  $^1\text{H}$  NMR (500 MHz,  $\text{CDCl}_3$ ):  $\delta$  8.38 (d,  $J = 5.7$  Hz, 1H), 8.21 (d,  $J = 8.5$  Hz, 1H), 7.89-7.82 (m, 4H), 7.70 (d,  $J = 8.1$  Hz, 1H), 7.59 (t,  $J = 7.1$  Hz, 1H), 7.51 (t,  $J = 7.4$  Hz, 1H), 7.47-7.40 (m, 4H), 7.32-7.26 (m, 3H), 3.75-3.62 (m, 2H), 2.82-2.76 (m, 1H), 1.17-1.13 (m, 1H), 0.05-0.02 (m, 1H), -0.05-(-0.11) (m, 1H), -0.42-(-0.52) (m, 2H).  $^{13}\text{C}$  NMR (125 MHz,  $\text{CDCl}_3$ ):  $\delta$  159.8 (d,  $J = 11.6$  Hz), 141.4, 136.0, 133.5 (d,  $J = 95.2$  Hz), 132.6 (d,  $J = 92.8$  Hz), 130.9 (d,  $J = 8.8$  Hz), 131.41, 131.39, 131.35 (d,  $J = 9.1$  Hz), 131.31, 129.8, 128.4 (d,  $J = 11.5$  Hz), 128.3 (d,  $J = 11.6$  Hz), 127.8, 127.1, 125.4, 119.5, 42.8 (d,  $J = 70.6$  Hz), 33.3, 10.5, 5.72, 4.1 (d,  $J = 12.8$  Hz).  $^{31}\text{P}$  NMR (200 MHz,  $\text{CDCl}_3$ ):  $\delta$  35.9; HRMS (ESI)  $m/z$ : calcd for  $\text{C}_{26}\text{H}_{25}\text{NOP}$   $[\text{M}+\text{H}]^+$  398.1668, found 398.1662.

**(R, E)-(1-(isoquinolin-1-yl)-4-phenylbut-3-en-2-yl)diphenylphosphine oxide 3f**

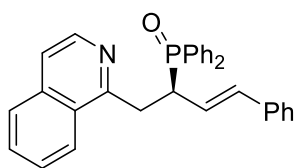

White solid, 70% yield; m.p. 154-155 °C;  $[\alpha]_D^{20} = 47.2$  (0.6, CHCl<sub>3</sub>); *ee* was determined to be 86% by HPLC analysis with a Chiralcel IC column (hexane/2-propanol 80:20, 1.0 mL/min, 220 nm);  $t_r$  (minor) = 24.15 min,  $t_r$  (major) = 29.28 min; <sup>1</sup>H NMR (500 MHz, CDCl<sub>3</sub>):  $\delta$  8.40 (d,  $J = 5.7$  Hz, 1H), 8.19 (d,  $J = 8.5$  Hz, 1H), 7.98-7.94 (m, 2H), 7.88-7.84 (m, 2H), 7.71 (d,  $J = 8.0$  Hz, 1H), 7.60-7.53 (m, 2H), 7.46-7.41 (m, 7H), 7.14-7.06 (m, 3H), 7.00 (d,  $J = 8.6$  Hz, 2H), 6.24-6.12 (m, 2H), 4.39-4.33 (m, 1H), 3.89-3.75 (m, 2H). <sup>13</sup>C NMR (125 MHz, CDCl<sub>3</sub>):  $\delta$  158.4 (d,  $J = 12.9$  Hz), 141.6, 136.8 (d,  $J = 2.7$  Hz), 136.82, 136.1, 135.1 (d,  $J = 17.3$  Hz), 132.2 (d,  $J = 5.2$  Hz), 131.76 (d,  $J = 2.5$  Hz), 131.71 (d,  $J = 2.5$  Hz), 131.5 (d,  $J = 8.8$  Hz), 131.3 (d,  $J = 8.6$  Hz), 129.9, 128.7 (d,  $J = 11.0$  Hz), 128.5 (d,  $J = 11.5$  Hz), 128.3, 127.5, 127.3 (d,  $J = 5.7$  Hz), 127.28, 126.15, 126.14, 125.1, 124.0 (d,  $J = 7.3$  Hz), 119.6, 43.4 (d,  $J = 68.5$  Hz), 32.4. <sup>31</sup>P NMR (200 MHz, CDCl<sub>3</sub>):  $\delta$  34.2; HRMS (ESI) *m/z*: calcd for C<sub>31</sub>H<sub>27</sub>NOP [M+H]<sup>+</sup> 460.1825, found 460.1818.

**(R)-(2-(isoquinolin-1-yl)-1-phenylethyl)diphenylphosphine oxide 3g**

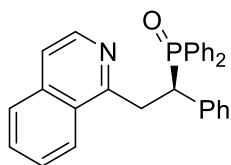

White solid, 87% yield; m.p. 159-160 °C;  $[\alpha]_D^{20} = 153.7$  (c = 0.6, CHCl<sub>3</sub>); *ee* was determined to be 92% by HPLC analysis with a Chiralcel IC column (hexane/2-propanol 70:30, 1.0 mL/min, 220 nm);  $t_r$  (major) = 13.93 min,  $t_r$  (minor) = 11.64 min; <sup>1</sup>H NMR (500 MHz, CDCl<sub>3</sub>):  $\delta$  8.35 (d,  $J = 1.4$  Hz, 1H), 8.06-7.99 (m, 3H), 7.62-7.60 (m, 1H), 7.53-7.49 (m, 3H), 7.44-7.37 (m, 6H), 7.33-7.32 (m, 1H), 7.28-7.26 (m, 1H), 7.22-7.19 (m, 2H), 7.02 (t,  $J = 1.8$  Hz, 2H), 6.98-6.95 (m, 1H), 4.86-4.84 (m, 1H), 4.23-4.16 (m, 1H), 3.87-3.81 (m, 1H). <sup>13</sup>C NMR (125 MHz, CDCl<sub>3</sub>):  $\delta$  158.0 (d,  $J = 12.4$  Hz), 141.4, 136.3 (d,  $J = 5.4$  Hz), 135.9, 132.7 (d,  $J = 60.1$  Hz), 131.9 (d,  $J = 54.5$  Hz), 131.6 (d,  $J = 2.3$  Hz), 131.3 (d,  $J = 8.5$  Hz), 131.2 (d,  $J = 2.5$  Hz), 131.0 (d,  $J = 8.7$  Hz), 130.1 (d,  $J = 5.6$  Hz), 129.8, 128.7 (d,  $J = 11.1$  Hz), 128.1, 128.0, 127.4, 127.0, 126.73, 126.72, 125.0, 119.4, 44.8 (d,  $J = 67.8$  Hz), 33.9. <sup>31</sup>P NMR (200 MHz, CDCl<sub>3</sub>):  $\delta$  34.4; HRMS (ESI) *m/z*: calcd for C<sub>29</sub>H<sub>25</sub>NOP [M+H]<sup>+</sup> 434.1668, found 434.1661.

**(R)-(2-(isoquinolin-1-yl)-1-(*p*-tolyl)ethyl)diphenylphosphine oxide 3h**

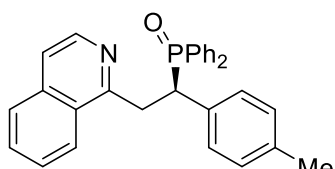

White solid, 75% yield; m.p. 178-179 °C;  $[\alpha]_D^{20} = 148.3$  (c = 0.6, CHCl<sub>3</sub>); *ee* was determined to be 91% by HPLC analysis with a Chiralcel IC column (hexane/2-propanol 70:30, 1.0 mL/min, 220 nm);  $t_r$  (minor) = 11.44 min,  $t_r$  (major) = 13.25 min; <sup>1</sup>H NMR (500 MHz, CDCl<sub>3</sub>):  $\delta$  8.35 (d,  $J = 1.4$  Hz, 1H), 8.04 (d,  $J = 2.1$  Hz, 1H), 7.98 (t,  $J = 2.2$  Hz, 2H), 7.63-7.62 (m, 1H), 7.56-7.51 (m, 3H), 7.46-7.43 (m, 1H), 7.38-7.33 (m, 4H), 7.31-7.26 (m, 3H), 7.23-7.20 (m, 2H), 6.82 (d,  $J = 1.9$  Hz, 2H), 4.88-4.84 (m, 1H), 4.18-4.11 (m, 1H), 3.87-3.81 (m, 1H), 2.09 (s, 3H). <sup>13</sup>C NMR (125 MHz, CDCl<sub>3</sub>):  $\delta$  158.1 (d,  $J = 12.0$  Hz),

141.4, 136.2 (d,  $J = 2.4$  Hz), 133.1 (d,  $J = 5.3$  Hz), 132.8 (d,  $J = 50.8$  Hz), 132.0 (d,  $J = 45.0$  Hz), 131.53, 131.51, 131.3 (d,  $J = 8.6$  Hz), 131.18, 131.16, 131.1 (d,  $J = 8.9$  Hz), 129.9, 129.8 (d,  $J = 14.6$  Hz), 128.7, 128.6 (d,  $J = 11.3$  Hz), 128.1 (d,  $J = 11.6$  Hz), 127.4, 127.0, 125.0, 119.4, 44.2 (d,  $J = 68.3$  Hz), 34.0, 30.0.  $^{31}\text{P}$  NMR (200 MHz,  $\text{CDCl}_3$ ):  $\delta$  34.3; HRMS (ESI)  $m/z$ : calcd for  $\text{C}_{30}\text{H}_{27}\text{NOP}$   $[\text{M}+\text{H}]^+$  448.1825, found 448.1818.

**(*R*)-(2-(isoquinolin-1-yl)-1-(4-methoxyphenyl)ethyl)diphenylphosphine oxide 3i**

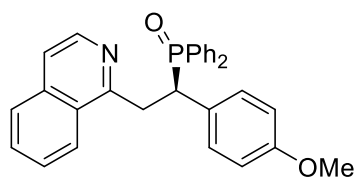

White solid, 80% yield; m.p. 181-182 °C;  $[\alpha]_D^{20} = 143.3$  ( $c = 0.7$ ,  $\text{CHCl}_3$ );  $ee$  was determined to be 83% by HPLC analysis with a Chiralcel OD-H column (hexane/2-propanol 90:10, 1.0 mL/min, 220 nm);  $t_r$  (minor) = 12.81 min,  $t_r$  (major) = 14.30 min;  $^1\text{H}$  NMR (500 MHz,  $\text{CDCl}_3$ ):  $\delta$  8.36 (d,  $J = 5.6$  Hz, 1H), 8.06-8.01 (m, 3H), 7.63 (d,  $J = 8.1$  Hz, 1H), 7.58-7.50 (m, 3H), 7.46-7.41 (m, 4H), 7.35-7.30 (m, 4H), 7.25-7.22 (m, 2H), 6.57 (d,  $J = 8.6$  Hz, 2H), 4.85-4.81 (m, 1H), 4.20-4.13 (m, 1H), 3.83-3.78 (m, 1H), 3.58 (s, 3H).  $^{13}\text{C}$  NMR (125 MHz,  $\text{CDCl}_3$ ):  $\delta$  158.3 (d,  $J = 2.2$  Hz), 158.2 (d,  $J = 12.6$  Hz), 141.5, 135.9, 132.9 (d,  $J = 55.3$  Hz), 132.1 (d,  $J = 49.1$  Hz), 131.6 (d,  $J = 2.3$  Hz), 131.3 (d,  $J = 8.6$  Hz), 131.18 (d,  $J = 2.5$  Hz), 131.06, 131.05, 131.02 (d,  $J = 5.4$  Hz), 129.7, 128.7 (d,  $J = 11.2$  Hz), 128.1, 128.08 (d,  $J = 11.7$  Hz), 127.4, 127.0 (d,  $J = 4.3$  Hz), 124.9, 119.4, 113.4, 55.0, 43.8 (d,  $J = 68.7$  Hz), 33.9.  $^{31}\text{P}$  NMR (200 MHz,  $\text{CDCl}_3$ ):  $\delta$  34.4; HRMS (ESI)  $m/z$ : calcd for  $\text{C}_{30}\text{H}_{27}\text{NO}_2\text{P}$   $[\text{M}+\text{H}]^+$  464.1774, found 464.1767.

**(*R*)-(1-(4-fluorophenyl)-2-(isoquinolin-1-yl)ethyl)diphenylphosphine oxide 3j**

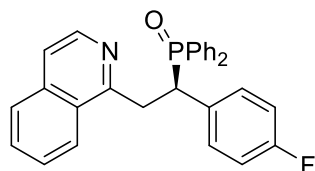

White solid, 64% yield; m.p. 171-172 °C;  $[\alpha]_D^{20} = 138.7$  ( $c = 0.6$ ,  $\text{CHCl}_3$ );  $ee$  was determined to be 83% by HPLC analysis with a Chiralcel OD-H column (hexane/2-propanol 99:1, 0.5 mL/min, 230 nm);  $t_r$  (minor) = 28.45 min,  $t_r$  (major) = 30.33 min;  $^1\text{H}$  NMR (500 MHz,  $\text{CDCl}_3$ ):  $\delta$  8.35 (d,  $J = 5.7$  Hz, 1H), 8.04-8.00 (m, 3H), 7.65 (d,  $J = 8.1$  Hz, 1H), 7.56-7.50 (m, 3H), 7.48-7.43 (m, 4H), 7.37-7.30 (m, 4H), 7.26-7.23 (m, 2H), 6.72 (t,  $J = 8.7$  Hz, 2H), 4.86-4.82 (m, 1H), 4.18-4.11 (m, 1H), 3.81-3.75 (m, 1H).  $^{13}\text{C}$  NMR (125 MHz,  $\text{CDCl}_3$ ):  $\delta$  162.6 (d,  $J = 2.5$  Hz), 160.7 (d,  $J = 2.5$  Hz), 157.8 (d,  $J = 12.6$  Hz), 141.5, 135.9, 132.7, 132.1 (t,  $J = 5.4$  Hz), 131.9 (d,  $J = 63.8$  Hz), 131.7 (d,  $J = 2.5$  Hz), 131.5 (dd,  $J = 7.5, 5.9$  Hz), 131.3, 131.2, 130.9 (d,  $J = 8.8$  Hz), 129.8, 128.8 (d,  $J = 11.0$  Hz), 128.2 (d,  $J = 11.6$  Hz), 127.4, 127.1 (d,  $J = 2.8$  Hz), 124.8, 119.5, 114.9 (d,  $J = 21.8$  Hz), 43.8 (d,  $J = 68.1$  Hz), 33.9.  $^{31}\text{P}$  NMR (200 MHz,  $\text{CDCl}_3$ ):  $\delta$  34.1;  $^{19}\text{F}$  NMR (376 MHz,  $\text{CDCl}_3$ ):  $\delta$  -115.8; HRMS (ESI)  $m/z$ : calcd for  $\text{C}_{29}\text{H}_{24}\text{FNOP}$   $[\text{M}+\text{H}]^+$  452.1574, found 452.1567.

**(*R*)-(1-(4-chlorophenyl)-2-(isoquinolin-1-yl)ethyl)diphenylphosphine oxide 3k**

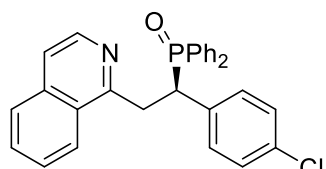

White solid, 80% yield; m.p. 215-216 °C;  $[\alpha]_D^{20} = 148.0$  ( $c = 0.6$ ,  $\text{CHCl}_3$ ); *ee* was determined to be 74% by HPLC analysis with a Chiralcel OD-H column (hexane/2-propanol 95:5, 0.5 mL/min, 220 nm);  $t_r$  (minor) = 15.97 min,  $t_r$  (major) = 17.22 min;  $^1\text{H NMR}$  (500 MHz,  $\text{CDCl}_3$ ):  $\delta$  8.35 (d,  $J = 5.7$  Hz, 1H), 8.03-8.00 (m, 3H), 7.65 (d,  $J = 8.1$  Hz, 1H), 7.56-7.52 (m, 3H), 7.46-7.43 (m, 4H), 7.36-7.30 (m, 4H), 7.26-7.23 (m, 2H), 7.00 (d,  $J = 8.4$  Hz, 2H), 4.89-4.85 (m, 1H), 4.18-4.11 (m, 1H), 3.81-3.75 (m, 1H).  $^{13}\text{C NMR}$  (125 MHz,  $\text{CDCl}_3$ ):  $\delta$  157.6 (d,  $J = 12.3$  Hz), 135.9, 135.1 (d,  $J = 5.3$  Hz), 132.54 (d,  $J = 2.8$  Hz), 132.51, 132.1 (d,  $J = 42.3$  Hz), 131.8 (d,  $J = 2.3$  Hz), 131.41, 131.39, 131.31, 131.30, 131.27 (d,  $J = 8.7$  Hz), 130.9 (d,  $J = 8.9$  Hz), 129.8, 128.8 (d,  $J = 11.1$  Hz), 128.2, 128.1, 127.4, 127.1, 124.7, 119.5, 43.9 (d,  $J = 65.3$  Hz), 33.7.  $^{31}\text{P NMR}$  (200 MHz,  $\text{CDCl}_3$ ):  $\delta$  33.9; HRMS (ESI)  $m/z$ : calcd for  $\text{C}_{29}\text{H}_{24}\text{ClNOP}$   $[\text{M}+\text{H}]^+$  468.1279, found 468.1273.

**(R)-1-(4-bromophenyl)-2-(isoquinolin-1-yl)ethyl diphenylphosphine oxide 3l**

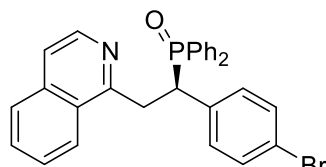

White solid, 70% yield; m.p. 230-231 °C;  $[\alpha]_D^{20} = 165.4$  ( $c = 0.6$ ,  $\text{CHCl}_3$ ); *ee* was determined to be 84% by HPLC analysis with a Chiralcel OD-H column (hexane/2-propanol 95:5, 1.0 mL/min, 220 nm);  $t_r$  (minor) = 7.80 min,  $t_r$  (major) = 8.42 min;  $^1\text{H NMR}$  (500 MHz,  $\text{CDCl}_3$ ):  $\delta$  8.35 (d,  $J = 5.7$  Hz, 1H), 8.04-7.99 (m, 3H), 7.67 (d,  $J = 8.1$  Hz, 1H), 7.57-7.52 (m, 3H), 7.49-7.44 (m, 4H), 7.38-7.32 (m, 2H), 7.28-7.26 (m, 4H), 7.16 (d,  $J = 8.3$  Hz, 2H), 4.88-4.84 (m, 1H), 4.17-4.10 (m, 1H), 3.81-3.75 (m, 1H).  $^{13}\text{C NMR}$  (125 MHz,  $\text{CDCl}_3$ ):  $\delta$  157.5 (d,  $J = 12.5$  Hz), 141.4, 135.9, 135.6 (d,  $J = 5.3$  Hz), 132.5 (d,  $J = 56.7$  Hz), 131.8, 131.7, 131.4 (d,  $J = 2.5$  Hz), 131.3, 131.2 (d,  $J = 4.7$  Hz), 131.06, 131.05, 130.9 (d,  $J = 8.9$  Hz), 129.8, 128.8 (d,  $J = 11.1$  Hz), 128.2 (d,  $J = 11.7$  Hz), 127.4, 127.2, 124.7, 120.8 (d,  $J = 2.8$  Hz), 119.5, 43.9 (d,  $J = 67.7$  Hz), 33.7.  $^{31}\text{P NMR}$  (200 MHz,  $\text{CDCl}_3$ ):  $\delta$  33.7; HRMS (ESI)  $m/z$ : calcd for  $\text{C}_{29}\text{H}_{24}\text{BrNOP}$   $[\text{M}+\text{H}]^+$  512.0773, found 512.0768.

**(R)-2-(isoquinolin-1-yl)-1-(4-(trifluoromethoxy)phenyl)ethyl diphenylphosphine oxide 3m**

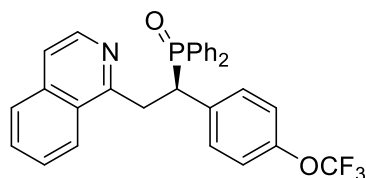

White solid, 94% yield; m.p. 182-183 °C;  $[\alpha]_D^{20} = 139.4$  ( $c = 0.6$ ,  $\text{CHCl}_3$ ); *ee* was determined to be 81% by HPLC analysis with a Chiralcel OD-H column (hexane/2-propanol 95:5, 0.5 mL/min, 220 nm);  $t_r$  (minor) = 13.32 min,  $t_r$  (major) = 14.20 min;  $^1\text{H NMR}$  (500 MHz,  $\text{CDCl}_3$ ):  $\delta$  8.36 (d,  $J = 5.7$  Hz, 1H), 8.04-8.01 (m, 3H), 7.65 (d,  $J = 8.1$  Hz, 1H), 7.55-7.49 (m, 3H), 7.47-7.40 (m, 6H), 7.37 (d,  $J = 5.7$  Hz, 1H), 7.32-7.29 (m, 1H), 7.24-7.20 (m, 2H), 6.89 (d,  $J = 8.3$  Hz, 2H), 4.91-4.87 (m, 1H), 4.19-4.13 (m, 1H), 3.84-3.78 (m, 1H).  $^{13}\text{C NMR}$  (125 MHz,  $\text{CDCl}_3$ ):  $\delta$  157.5 (d,  $J = 12.2$  Hz), 147.9, 141.5, 135.9, 135.4 (d,  $J = 5.3$  Hz), 132.5 (d,  $J = 99.2$  Hz), 131.84, 131.82 (d,  $J = 2.5$  Hz), 131.4, 131.3, 131.2, 131.1,

130.9 (d,  $J = 8.9$  Hz), 129.8, 128.8 (d,  $J = 11.3$  Hz), 128.1 (d,  $J = 11.6$  Hz), 127.4, 127.1, 124.7, 123.4 (q,  $J = 255.3$  Hz), 120.4, 119.6, 44.0 (d,  $J = 67.7$  Hz), 33.8.  $^{31}\text{P}$  NMR (200 MHz,  $\text{CDCl}_3$ ):  $\delta$  34.2;  $^{19}\text{F}$  NMR (376 MHz,  $\text{CDCl}_3$ ):  $\delta$  -57.9; HRMS (ESI)  $m/z$ : calcd for  $\text{C}_{30}\text{H}_{24}\text{F}_3\text{NO}_2\text{P}$   $[\text{M}+\text{H}]^+$  518.1491, found 518.1487.

**(*R*)-(2-(isoquinolin-1-yl)-1-(4-(trifluoromethyl)phenyl)ethyl)diphenylphosphine oxide 3n**

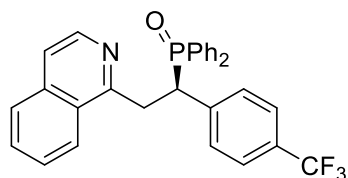

White solid, 90% yield; m.p. 235-236 °C;  $[\alpha]^{20}_{\text{D}} = 129.8$  ( $c = 0.8$ ,  $\text{CHCl}_3$ );  $ee$  was determined to be 74% by HPLC analysis with a Chiralcel OD-H column (hexane/2-propanol 90:10, 0.5 mL/min, 220 nm);  $t_{\text{r}}$  (minor) = 10.29 min,  $t_{\text{r}}$  (major) = 11.01 min;  $^1\text{H}$  NMR (500 MHz,  $\text{CDCl}_3$ ):  $\delta$  8.37 (d,  $J = 5.4$  Hz, 1H), 8.07-8.05 (m, 3H), 7.69 (d,  $J = 8.0$  Hz, 1H), 7.59-7.54 (m, 5H), 7.51-7.47 (m, 4H), 7.40 (d,  $J = 5.3$  Hz, 1H), 7.34-7.27 (m, 5H), 5.00 (s, 1H), 4.26-4.19 (m, 1H), 3.88-3.83 (m, 1H).  $^{13}\text{C}$  NMR (125 MHz,  $\text{CDCl}_3$ ):  $\delta$  157.3 (d,  $J = 12.2$  Hz), 141.4, 140.9 (d,  $J = 5.2$  Hz), 135.9, 132.3 (d,  $J = 63.0$  Hz), 131.9 (d,  $J = 2.3$  Hz), 131.5 (d,  $J = 2.4$  Hz), 131.3 (d,  $J = 2.4$  Hz), 131.0, 130.9 (d,  $J = 8.7$  Hz), 130.4 (d,  $J = 5.5$  Hz), 129.9, 128.8 (d,  $J = 11.4$  Hz), 128.2 (d,  $J = 11.7$  Hz), 127.3, 127.2 (d,  $J = 4.3$  Hz), 125.2 (q,  $J = 270.4$  Hz), 124.8, 124.6, 119.6, 119.6, 44.4 (d,  $J = 67.0$  Hz), 33.7.  $^{31}\text{P}$  NMR (200 MHz,  $\text{CDCl}_3$ ):  $\delta$  33.9;  $^{19}\text{F}$  NMR (376 MHz,  $\text{CDCl}_3$ ):  $\delta$  -57.9; HRMS (ESI)  $m/z$ : calcd for  $\text{C}_{30}\text{H}_{24}\text{F}_3\text{NOP}$   $[\text{M}+\text{H}]^+$  502.1542, found 502.1534.

**(*R*)-(1-([1,1'-biphenyl]-4-yl)-2-(isoquinolin-1-yl)ethyl)diphenylphosphine oxide 3o**

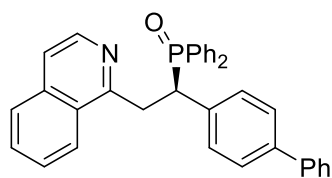

White solid, 66% yield; m.p. 196-197 °C;  $[\alpha]^{20}_{\text{D}} = 162.7$  ( $c = 0.7$ ,  $\text{CHCl}_3$ );  $ee$  was determined to be 80% by HPLC analysis with a Chiralcel OD-H column (hexane/2-propanol 95:5, 1.0 mL/min, 220 nm);  $t_{\text{r}}$  (minor) = 10.45 min,  $t_{\text{r}}$  (major) = 11.50 min;  $^1\text{H}$  NMR (500 MHz,  $\text{CDCl}_3$ ):  $\delta$  8.39 (d,  $J = 5.6$  Hz, 1H), 8.11 (d,  $J = 8.5$  Hz, 1H), 8.05-8.01 (m, 2H), 7.67 (d,  $J = 8.5$  Hz, 1H), 7.58-7.54 (m, 3H), 7.49-7.42 (m, 8H), 7.38 (d,  $J = 5.6$  Hz, 1H), 7.35-7.28 (m, 5H), 7.26-7.22 (m, 3H), 4.94-4.90 (m, 1H), 4.26-2.0 (m, 1H), 3.90-3.84 (m, 1H).  $^{13}\text{C}$  NMR (125 MHz,  $\text{CDCl}_3$ ):  $\delta$  158.0 (d,  $J = 12.4$  Hz), 141.5, 140.7, 139.2 (d,  $J = 2.5$  Hz), 132.8 (d,  $J = 61.4$  Hz), 132.0 (d,  $J = 55.7$  Hz), 131.6 (d,  $J = 2.5$  Hz), 131.4, 131.3, 131.27, 131.25, 131.1 (d,  $J = 8.9$  Hz), 130.5 (d,  $J = 5.7$  Hz), 129.8, 128.7, 128.62, 128.6, 128.1 (d,  $J = 11.6$  Hz), 127.5, 127.1, 127.08, 126.8, 126.6, 125.0, 119.5, 44.4 (d,  $J = 69.5$  Hz), 33.8.  $^{31}\text{P}$  NMR (200 MHz,  $\text{CDCl}_3$ ):  $\delta$  34.3; HRMS (ESI)  $m/z$ : calcd for  $\text{C}_{35}\text{H}_{29}\text{NOP}$   $[\text{M}+\text{H}]^+$  510.1981, found 510.1975.

**(R)-(2-(isoquinolin-1-yl)-1-(*m*-tolyl)ethyl)diphenylphosphine oxide 3p**

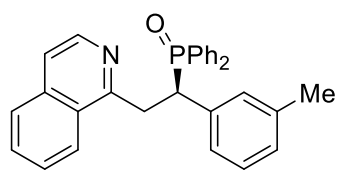

White solid, 89% yield; m.p. 103-104 °C;  $[\alpha]_D^{20} = 134.2$  ( $c = 0.6$ ,  $\text{CHCl}_3$ ); *ee* was determined to be 81% by HPLC analysis with a Chiralcel IC column (hexane/2-propanol 70:30, 1.0 mL/min, 220 nm);  $t_r$  (minor) = 11.67 min,  $t_r$  (major) = 15.95 min;  $^1\text{H NMR}$  (500 MHz,  $\text{CDCl}_3$ ):  $\delta$  8.35 (d,  $J = 1.4$  Hz, 1H), 8.04 (d,  $J = 2.1$  Hz, 1H), 7.98 (t,  $J = 2.2$  Hz, 2H), 7.63-7.62 (m, 1H), 7.56-7.51 (m, 3H), 7.46-7.43 (m, 1H), 7.38-7.33 (m, 4H), 7.31-7.26 (m, 3H), 7.23-7.20 (m, 2H), 6.82 (d,  $J = 1.9$  Hz, 2H), 4.88-4.84 (m, 1H), 4.18-4.11 (m, 1H), 3.87-3.81 (m, 1H), 2.09 (s, 3H).  $^{13}\text{C NMR}$  (125 MHz,  $\text{CDCl}_3$ ):  $\delta$  158.1 (d,  $J = 12.0$  Hz), 141.4, 136.2 (d,  $J = 2.4$  Hz), 133.1 (d,  $J = 5.3$  Hz), 132.8 (d,  $J = 50.8$  Hz), 132.0 (d,  $J = 45.0$  Hz), 131.53, 131.51, 131.3 (d,  $J = 8.6$  Hz), 131.18, 131.16, 131.1 (d,  $J = 8.9$  Hz), 129.9, 129.8 (d,  $J = 14.6$  Hz), 128.7, 128.6 (d,  $J = 11.3$  Hz), 128.1 (d,  $J = 11.6$  Hz), 127.4, 127.0, 125.0, 119.4, 44.2 (d,  $J = 68.3$  Hz), 34.0, 30.0.  $^{31}\text{P NMR}$  (200 MHz,  $\text{CDCl}_3$ ):  $\delta$  34.3; HRMS (ESI)  $m/z$ : calcd for  $\text{C}_{30}\text{H}_{27}\text{NOP}$   $[\text{M}+\text{H}]^+$  448.1825, found 448.1818.

**(R)-(2-(isoquinolin-1-yl)-1-(naphthalen-2-yl)ethyl)diphenylphosphine oxide 3q**

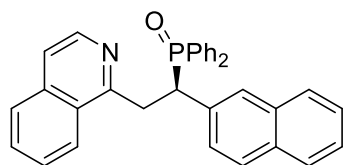

White solid, 70% yield; m.p. 192-193 °C;  $[\alpha]_D^{20} = 148.2$  ( $c = 0.5$ ,  $\text{CHCl}_3$ ); *ee* was determined to be 77% by HPLC analysis with a Chiralcel OD-H column (hexane/2-propanol 98:2, 1.0 mL/min, 220 nm);  $t_r$  (minor) = 19.87 min,  $t_r$  (major) = 21.98 min;  $^1\text{H NMR}$  (500 MHz,  $\text{CDCl}_3$ ):  $\delta$  8.35 (d,  $J = 5.7$  Hz, 1H), 8.12 (d,  $J = 8.5$  Hz, 1H), 8.06-8.01 (m, 2H), 7.85 (s, 1H), 7.65-7.61 (m, 3H), 7.55-7.50 (m, 5H), 7.47-7.41 (m, 4H), 7.33-7.29 (m, 3H), 7.26-7.23 (m, 1H), 7.18-7.15 (m, 2H), 5.06-5.02 (m, 1H), 4.33-26 (m, 1H), 3.95-3.89 (m, 1H).  $^{13}\text{C NMR}$  (125 MHz,  $\text{CDCl}_3$ ):  $\delta$  157.9 (d,  $J = 12.1$  Hz), 141.4, 135.9, 134.1 (d,  $J = 5.5$  Hz), 133.1 (d,  $J = 1.5$  Hz), 132.6 (d,  $J = 34.6$  Hz), 132.2, 131.8 (d,  $J = 29.0$  Hz), 131.6 (d,  $J = 2.5$  Hz), 131.34, 131.26, 131.24, 131.0 (d,  $J = 8.9$  Hz), 129.7, 129.0 (d,  $J = 6.7$  Hz), 128.7 (d,  $J = 11.1$  Hz), 128.3 (d,  $J = 5.1$  Hz), 128.1 (d,  $J = 32.0$  Hz), 127.8, 127.5, 127.4, 127.36, 127.0, 125.6 (q,  $J = 18.6$  Hz), 124.9, 124.6, 119.5, 44.7 (d,  $J = 67.7$  Hz), 34.0.  $^{31}\text{P NMR}$  (200 MHz,  $\text{CDCl}_3$ ):  $\delta$  34.2; HRMS (ESI)  $m/z$ : calcd for  $\text{C}_{33}\text{H}_{27}\text{NOP}$   $[\text{M}+\text{H}]^+$  484.1825, found 484.1819.

**(R)-(1-(furan-2-yl)-2-(isoquinolin-1-yl)ethyl)diphenylphosphine oxide 3r**

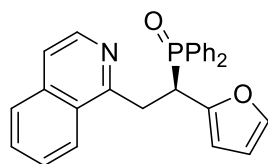

White solid, 83% yield; m.p. 135-136 °C;  $[\alpha]_D^{20} = 92.5$  ( $c = 0.6$ ,  $\text{CHCl}_3$ ); *ee* was determined to be 88% by HPLC analysis with a Chiralcel IC column (hexane/2-propanol 70:30, 1.0 mL/min, 220 nm);  $t_r$  (minor) = 19.44 min,  $t_r$  (major) = 24.21 min;  $^1\text{H NMR}$  (500 MHz,  $\text{CDCl}_3$ ):  $\delta$  8.35 (d,  $J = 5.7$  Hz, 1H), 8.12 (d,  $J = 8.5$  Hz, 1H), 7.95-7.91 (m, 2H), 7.68-7.62 (m, 3H), 7.58-7.55 (m, 1H), 7.50-7.47 (m, 1H), 7.45-7.38 (m, 5H), 7.35-7.32 (m, 2H), 7.06 (s, 1H), 6.07-6.03 (m, 2H), 5.05-5.00 (m, 1H), 4.17-4.11 (m, 1H), 3.84-3.78 (m, 1H).  $^{13}\text{C NMR}$  (125

MHz, CDCl<sub>3</sub>):  $\delta$  157.8 (d,  $J$  = 12.1 Hz), 141.62, 141.60, 141.58, 136.0, 132.1 (d,  $J$  = 26.1 Hz), 131.8 (d,  $J$  = 2.7 Hz), 131.6 (d,  $J$  = 2.7 Hz), 131.4, 131.3, 131.27 (d,  $J$  = 9.2 Hz), 131.1, 129.8, 128.7 (d,  $J$  = 11.4 Hz), 128.2 (d,  $J$  = 11.8 Hz), 127.3, 127.1, 114.9, 119.6, 110.5 (d,  $J$  = 2.5 Hz), 109.1 (d,  $J$  = 6.2 Hz), 39.7 (d,  $J$  = 70.1 Hz), 32.0. <sup>31</sup>P NMR (200 MHz, CDCl<sub>3</sub>):  $\delta$  32.6; HRMS (ESI)  $m/z$ : calcd for C<sub>27</sub>H<sub>23</sub>NO<sub>2</sub>P [M+H]<sup>+</sup> 424.1461, found 424.1454.

**(R)-(1-(furan-3-yl)-2-(isoquinolin-1-yl)ethyl)diphenylphosphine oxide 3s**

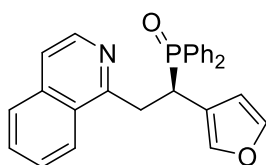

White solid, 93% yield; m.p. 175-176 °C;  $[\alpha]_D^{20}$  = 74.2 (c = 0.6, CHCl<sub>3</sub>); *ee* was determined to be 87% by HPLC analysis with a Chiralcel OD-H column (hexane/2-propanol 98:2, 0.5 mL/min, 220 nm);  $t_r$  (minor) = 20.21 min,  $t_r$  (major) = 21.21 min; <sup>1</sup>H NMR (500 MHz, CDCl<sub>3</sub>):  $\delta$  8.39 (d,  $J$  = 5.6 Hz, 1H), 8.08 (d,  $J$  = 8.5 Hz, 1H), 7.99-7.95 (m, 2H), 7.71-7.67 (m, 3H), 7.57 (t,  $J$  = 7.6 Hz, 1H), 7.50-7.47 (m, 1H), 7.42-7.38 (m, 5H), 7.35-7.32 (m, 2H), 7.17 (s, 1H), 7.06 (s, 1H), 6.37 (s, 1H), 4.81-4.77 (m, 1H), 4.03-3.96 (m, 1H), 3.70-3.64 (m, 1H). <sup>13</sup>C NMR (125 MHz, CDCl<sub>3</sub>):  $\delta$  158.1 (d,  $J$  = 12.6 Hz), 142.3, 141.4 (d,  $J$  = 8.6 Hz), 136.0, 132.1 (d,  $J$  = 52.71 Hz), 131.8 (d,  $J$  = 51.6 Hz), 131.7 (d,  $J$  = 2.5 Hz), 131.24, 131.17, 131.1, 131.0, 129.8, 128.7 (d,  $J$  = 11.4 Hz), 128.3 (d,  $J$  = 11.6 Hz), 127.5, 127.1, 124.9, 119.7 (d,  $J$  = 5.9 Hz), 119.5, 110.5 (d,  $J$  = 4.0 Hz), 35.6 (d,  $J$  = 71.0 Hz), 33.2. <sup>31</sup>P NMR (200 MHz, CDCl<sub>3</sub>):  $\delta$  34.0; HRMS (ESI)  $m/z$ : calcd for C<sub>27</sub>H<sub>23</sub>NO<sub>2</sub>P [M+H]<sup>+</sup> 424.1461, found 424.1454.

**(R)-(2-(isoquinolin-1-yl)-1-(thiophen-3-yl)ethyl)diphenylphosphine oxide 3t**

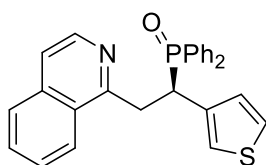

White solid, 72% yield; m.p. 174-175 °C;  $[\alpha]_D^{20}$  = 99.1 (c = 0.6, CHCl<sub>3</sub>); *ee* was determined to be 84% by HPLC analysis with a Chiralcel OD-H column (hexane/2-propanol 95:5, 1.0 mL/min, 220 nm);  $t_r$  (minor) = 8.72 min,  $t_r$  (major) = 9.38 min; <sup>1</sup>H NMR (500 MHz, CDCl<sub>3</sub>):  $\delta$  8.37 (d,  $J$  = 5.8 Hz, 1H), 8.04 (d,  $J$  = 8.6 Hz, 1H), 8.00-7.96 (m, 2H), 7.65 (t,  $J$  = 8.3 Hz, 1H), 7.57-7.52 (m, 3H), 7.46-7.42 (m, 4H), 7.37 (d,  $J$  = 5.7 Hz, 1H), 7.35-7.32 (m, 1H), 7.28-7.24 (m, 2H), 7.09 (s, 1H), 7.06 (d,  $J$  = 5.0 Hz, 1H), 6.96-6.94 (m, 1H), 5.01-5.00 (m, 1H), 4.13-4.07 (m, 1H), 3.79-3.73 (m, 1H). <sup>13</sup>C NMR (125 MHz, CDCl<sub>3</sub>):  $\delta$  158.1 (d,  $J$  = 12.6 Hz), 141.5, 136.1 (d,  $J$  = 5.4 Hz), 135.9, 132.8, 132.1 (d,  $J$  = 12.0 Hz), 131.7 (d,  $J$  = 2.5 Hz), 131.34, 131.32, 131.30, 131.27, 131.0 (d,  $J$  = 8.8 Hz), 129.8, 128.9 (d,  $J$  = 3.9 Hz), 128.7 (d,  $J$  = 11.3 Hz, 1H), 128.1 (d,  $J$  = 11.8 Hz, 1H), 127.4, 127.1, 124.9, 124.7, 123.8 (d,  $J$  = 7.3 Hz), 119.5, 40.5 (d,  $J$  = 67.8 Hz), 34.0. <sup>31</sup>P NMR (200 MHz, CDCl<sub>3</sub>):  $\delta$  34.0; HRMS (ESI)  $m/z$ : calcd for C<sub>27</sub>H<sub>23</sub>NOPS [M+H]<sup>+</sup> 440.1232, found 440.1227.

**(R)-(2-(isoquinolin-1-yl)-1-(pyridin-3-yl)ethyl)diphenylphosphine oxide 3u**

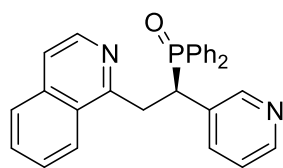

White solid, 86% yield; m.p. 184-185 °C;  $[\alpha]^{20}_{\text{D}} = 166.7$  ( $c = 0.7$ ,  $\text{CHCl}_3$ ); *ee* was determined to be 91% by HPLC analysis with a Chiralcel OD-H column (hexane/2-propanol 95:5, 1.0 mL/min, 230 nm);  $t_{\text{r}}$  (minor) = 22.33 min,  $t_{\text{r}}$  (major) = 24.72 min;  $^1\text{H}$  NMR (500 MHz,  $\text{CDCl}_3$ ):  $\delta$  8.36 (s, 1H), 8.33 (dd,  $J = 5.6, 3.5$  Hz, 1H), 8.18 (s, 1H), 8.05-7.97 (m, 4H), 7.63 (t,  $J = 7.1$  Hz, 1H), 7.56-7.52 (m, 3H), 7.47-7.44 (m, 4H), 7.34 (t,  $J = 5.5$  Hz, 1H), 7.31-7.28 (m, 1H), 7.24-7.23 (m, 2H), 7.02-6.99 (m, 1H), 4.93-4.89 (m, 1H), 4.20-4.13 (m, 1H), 3.81-3.76 (m, 1H).  $^{13}\text{C}$  NMR (125 MHz,  $\text{CDCl}_3$ ):  $\delta$  157.0 (d,  $J = 12.9$  Hz), 151.6 (d,  $J = 6.9$  Hz), 147.9 (d,  $J = 2.3$  Hz), 141.5, 136.8 (d,  $J = 4.7$  Hz), 135.9, 132.5 (d,  $J = 5.2$  Hz), 132.2 (d,  $J = 54.4$  Hz), 131.9 (d,  $J = 2.6$  Hz), 131.6 (d,  $J = 2.4$  Hz), 131.4 (d,  $J = 50.1$  Hz), 131.2 (d,  $J = 8.6$  Hz), 130.8 (d,  $J = 8.7$  Hz), 129.9, 128.9 (d,  $J = 11.3$  Hz), 128.4 (d,  $J = 11.8$  Hz), 127.3, 127.2, 124.5, 123.1 (d,  $J = 1.3$  Hz), 119.6, 41.8 (d,  $J = 67.9$  Hz), 33.4.  $^{31}\text{P}$  NMR (200 MHz,  $\text{CDCl}_3$ ):  $\delta$  34.0; HRMS (ESI)  $m/z$ : calcd for  $\text{C}_{28}\text{H}_{24}\text{N}_2\text{OP}$   $[\text{M}+\text{H}]^+$  435.1621, found 435.1616.

**(R)-(2-(isoquinolin-1-yl)-1-(pyridin-2-yl)ethyl)diphenylphosphine oxide 3v**

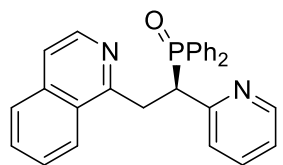

White solid, 92% yield; m.p. 125-126 °C;  $[\alpha]^{20}_{\text{D}} = 74.7$  ( $c = 0.6$ ,  $\text{CHCl}_3$ ); *ee* was determined to be 71% by HPLC analysis with a Chiralcel OD-H column (hexane/2-propanol 80:20, 1.0 mL/min, 210 nm);  $t_{\text{r}}$  (minor) = 8.41 min,  $t_{\text{r}}$  (major) = 10.32 min;  $^1\text{H}$  NMR (500 MHz,  $\text{CDCl}_3$ ):  $\delta$  8.30 (d,  $J = 5.6$ , 1H), 8.24 (d,  $J = 4.4$  Hz, 1H), 8.06 (d,  $J = 8.5$  Hz, 1H), 7.99-7.95 (m, 2H), 7.68-7.64 (m, 3H), 7.55 (t,  $J = 7.1$  Hz, 1H), 7.47-7.39 (m, 5H), 7.38-7.31 (m, 3H), 7.27-7.24 (m, 2H), 6.87-6.85 (m, 1H), 5.11-5.07 (m, 1H), 4.41-4.34 (m, 1H), 3.93-3.87 (m, 1H).  $^{13}\text{C}$  NMR (125 MHz,  $\text{CDCl}_3$ ):  $\delta$  158.0 (d,  $J = 12.5$  Hz), 156.6 (d,  $J = 4.6$  Hz), 148.8, 148.6, 136.0, 135.9, 132.3 (d,  $J = 5.0$  Hz), 131.7 (d,  $J = 2.5$  Hz), 131.5 (d,  $J = 8.7$  Hz), 131.4, 131.3, 131.2 (d,  $J = 4.7$  Hz), 129.7, 128.6 (d,  $J = 11.6$  Hz), 128.1 (d,  $J = 11.8$  Hz), 127.2, 127.1, 127.0, 125.0, 124.6 (d,  $J = 3.8$  Hz), 121.6 (d,  $J = 1.6$  Hz), 119.4, 47.9 (d,  $J = 65.4$  Hz), 33.0.  $^{31}\text{P}$  NMR (200 MHz,  $\text{CDCl}_3$ ):  $\delta$  33.7; HRMS (ESI)  $m/z$ : calcd for  $\text{C}_{28}\text{H}_{24}\text{N}_2\text{OP}$   $[\text{M}+\text{H}]^+$  435.1621, found 435.1616.

**(R)-(2-(isoquinolin-1-yl)-1-(pyridin-4-yl)ethyl)diphenylphosphine oxide 3w**

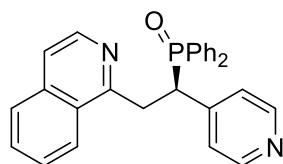

White solid, 97% yield; m.p. 184-185 °C;  $[\alpha]^{20}_{\text{D}} = 107.3$  ( $c = 0.7$ ,  $\text{CHCl}_3$ ); *ee* was determined to be 81% by HPLC analysis with a Chiralcel OD-H column (hexane/2-propanol 93:7, 0.5 mL/min, 220 nm);  $t_{\text{r}}$  (minor) = 30.21 min,  $t_{\text{r}}$  (major) = 33.01 min;  $^1\text{H}$  NMR (500 MHz,  $\text{CDCl}_3$ ):  $\delta$  8.33-8.27 (d,  $J = 5.6$  Hz, 1H), 8.27 (s, 2H), 8.06-8.00 (m, 3H), 7.68 (d,  $J = 8.0$  Hz, 1H), 7.58-7.53 (m, 3H), 7.51-7.46 (m, 4H), 7.39-7.31 (m, 4H), 7.28-7.25 (m, 2H), 4.92-4.88 (m, 1H), 4.23-4.17 (m, 1H), 3.82-3.76 (m, 1H).  $^{13}\text{C}$  NMR (125 MHz,  $\text{CDCl}_3$ ):  $\delta$  156.9 (d,



$J = 12.1$  Hz), 149.2, 146.0 (d,  $J = 4.8$  Hz), 141.4, 135.9, 132.99, 131.97, 131.6 (d,  $J = 2.6$  Hz), 131.57 (d,  $J = 46.0$  Hz), 131.2 (d,  $J = 8.8$  Hz), 130.9 (d,  $J = 9.1$  Hz), 129.9, 128.9, 128.8, 128.4 (d,  $J = 11.9$  Hz), 127.3, 127.2, 125.4, 124.5, 119.7, 44.1 (d,  $J = 66.4$  Hz), 33.1.  $^{31}\text{P}$  NMR (200 MHz,  $\text{CDCl}_3$ ):  $\delta$  33.3; HRMS (ESI)  $m/z$ : calcd for  $\text{C}_{28}\text{H}_{24}\text{N}_2\text{OP}$   $[\text{M}+\text{H}]^+$  435.1621, found 435.1616.

**(2-(isoquinolin-1-yl)-2-phenylethyl)diphenylphosphine oxide 3x**

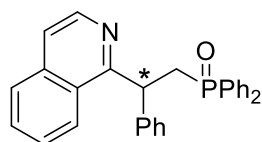

White solid, 93% yield; m.p. 136-137 °C;  $[\alpha]^{20}_{\text{D}} = -115$  ( $c = 0.5$ ,  $\text{CHCl}_3$ );  $ee$  was determined to be 53% by HPLC analysis with a Chiralcel OD-H column (hexane/2-propanol 95:5, 1.0 mL/min, 220 nm);  $t_{\text{r}}$  (major) = 9.79 min,  $t_{\text{r}}$  (minor) = 12.04 min;  $^1\text{H}$  NMR (500 MHz,  $\text{CDCl}_3$ ):  $\delta$  8.31 (d,  $J = 5.7$  Hz, 1H), 8.28 (d,  $J = 8.5$  Hz, 1H), 7.67-7.64 (m, 3H), 7.54-7.46 (m, 4H), 7.39-7.29 (m, 6H), 7.18-7.15 (m, 1H), 7.11-7.06 (m, 4H), 7.01-6.98 (m, 1H), 5.75-5.70 (m, 1H), 3.95-3.88 (m, 1H), 3.18-3.12 (m, 1H).  $^{13}\text{C}$  NMR (125 MHz,  $\text{CDCl}_3$ ):  $\delta$  160.5 (d,  $J = 5.5$  Hz), 143.2 (d,  $J = 8.8$  Hz), 141.1, 136.6, 133.7 (d,  $J = 24.3$  Hz), 132.9 (d,  $J = 23.8$  Hz), 131.3 (d,  $J = 2.4$  Hz), 130.9 (d,  $J = 2.7$  Hz), 130.7, 130.6, 130.5, 129.7, 128.5, 128.4 (d,  $J = 11.7$  Hz), 128.2, 127.9 (d,  $J = 11.7$  Hz), 127.2 (d,  $J = 12.9$  Hz), 126.7, 126.6, 125.1, 119.9, 41.3 (d,  $J = 1.3$  Hz), 36.5 (d,  $J = 68.6$  Hz).  $^{31}\text{P}$  NMR (200 MHz,  $\text{CDCl}_3$ ):  $\delta$  31.0; HRMS (ESI)  $m/z$ : calcd for  $\text{C}_{29}\text{H}_{25}\text{NOP}$   $[\text{M}+\text{H}]^+$  434.1668, found 434.1661.

**(R)-diphenyl(1-phenyl-2-(quinolin-2-yl)ethyl)phosphine oxide 3y**

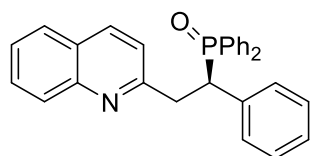

White solid, 73% yield; m.p. 192-193 °C;  $[\alpha]^{20}_{\text{D}} = -111$  ( $c = 0.6$ ,  $\text{CHCl}_3$ );  $ee$  was determined to be 54% by HPLC analysis with a Chiralcel AD-H column (hexane/2-propanol 70:30, 1.0 mL/min, 220 nm);  $t_{\text{r}}$  (minor) = 9.69 min,  $t_{\text{r}}$  (major) = 12.11 min;  $^1\text{H}$  NMR (500 MHz,  $\text{CDCl}_3$ ):  $\delta$  8.04-8.01 (m, 4H), 7.77 (d,  $J = 8.5$  Hz, 1H), 7.66-7.64 (m, 2H), 7.51-7.42 (m, 6H), 7.32-7.28 (m, 3H), 7.24-7.21 (m, 2H), 7.07-7.02 (m, 3H), 6.93 (d,  $J = 8.4$  Hz, 1H), 4.55 (dd,  $J = 14.8, 7.0$  Hz, 1H), 3.70-3.67 (m, 2H).  $^{13}\text{C}$  NMR (125 MHz,  $\text{CDCl}_3$ ):  $\delta$  159.3 (d,  $J = 12.8$  Hz), 147.8, 135.8, 132.6 (d,  $J = 61.5$  Hz), 131.8 (d,  $J = 56.2$  Hz), 131.6 (d,  $J = 2.2$  Hz), 131.5 (d,  $J = 8.5$  Hz), 131.4, 131.2 (d,  $J = 2.4$  Hz), 131.1 (d,  $J = 8.8$  Hz), 131.1 (d,  $J = 5.7$  Hz), 129.2, 128.8 (d,  $J = 13.2$  Hz), 128.6, 128.1, 128.06 (d,  $J = 12.2$  Hz), 127.5, 126.8 (d,  $J = 2.0$  Hz), 126.8, 125.8, 122.4, 46.1 (d,  $J = 67.6$  Hz), 33.6.  $^{31}\text{P}$  NMR (200 MHz,  $\text{CDCl}_3$ ):  $\delta$  33.7; HRMS (ESI)  $m/z$ : calcd for  $\text{C}_{29}\text{H}_{25}\text{NOP}$   $[\text{M}+\text{H}]^+$  434.1668, found 434.1661.

**(S)-diphenyl(1-(pyridin-2-yl)hexan-2-yl)phosphine oxide 3z**

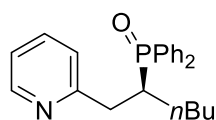

White solid, 76% yield; m.p. 87-88 °C;  $[\alpha]^{20}_{\text{D}} = 31.8$  ( $c = 0.9$ ,  $\text{CHCl}_3$ );  $ee$  was determined to be 87% by HPLC analysis with a Chiralcel OD-H column (hexane/2-propanol 90:10, 0.5 mL/min, 210 nm);  $t_{\text{r}}$  (minor) =

15.31 min,  $t_r$  (major) = 17.52 min;  $^1\text{H}$  NMR (600 MHz,  $\text{CDCl}_3$ ):  $\delta$  8.45 (d,  $J$  = 3.9 Hz, 1H), 7.85-7.77 (m, 4H), 7.42-7.28 (m, 7H), 6.99-7.34 (m, 2H), 3.21-3.12 (m, 2H), 3.00-2.91 (m, 1H), 1.69-1.58 (m, 1H), 1.51-1.46 (m, 1H), 1.18-1.10 (m, 1H), 1.08-0.96 (m, 3H), 0.59 (t,  $J$  = 7.0 Hz, 3H).  $^{13}\text{C}$  NMR (150 MHz,  $\text{CDCl}_3$ ):  $\delta$  158.5 (d,  $J$  = 11.6 Hz), 148.1, 135.1, 132.3 (d,  $J$  = 38.8 Hz), 131.7 (d,  $J$  = 37.5 Hz), 130.4, 130.2, 130.0, 129.9, 129.8, 127.5, 127.4 (d,  $J$  = 5.4 Hz), 127.3, 123.1, 120.2, 35.6, 35.1 (d,  $J$  = 4.9 Hz), 28.7 (d,  $J$  = 8.3 Hz), 26.7, 21.5, 12.5.  $^{31}\text{P}$  NMR (300 MHz,  $\text{CDCl}_3$ ):  $\delta$  31.4; HRMS (ESI)  $m/z$ : calcd for  $\text{C}_{23}\text{H}_{26}\text{NOP}$   $[\text{M}+\text{H}]^+$  364.1825, found 364.1829.

### (*R*)-diphenyl(1-phenyl-2-(pyridin-2-yl)ethyl)phosphine oxide 3aa

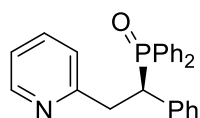

White solid, 65% yield; m.p. 148-149 °C;  $[\alpha]_D^{20}$  = 55.0 ( $c$  = 1.0,  $\text{CHCl}_3$ );  $ee$  was determined to be 84% by HPLC analysis with a Chiralcel AD-H column (hexane/2-propanol 80:20, 1.0 mL/min, 210 nm);  $t_r$  (major) = 19.31 min,  $t_r$  (minor) = 21.10 min;  $^1\text{H}$  NMR (600 MHz,  $\text{CDCl}_3$ ):  $\delta$  8.36 (d,  $J$  = 2.8 Hz, 1H), 7.97-7.95 (m, 2H), 7.43-7.38 (m, 5H), 7.22-7.18 (m, 2H), 7.15-7.11 (m, 4H), 6.85 (t,  $J$  = 5.3 Hz, 1H), 6.69 (d,  $J$  = 7.5 Hz, 1H), 4.27 (dd,  $J$  = 14.9, 8.0 Hz, 1H), 3.39 (t,  $J$  = 7.5 Hz, 2H).  $^{13}\text{C}$  NMR (150 MHz,  $\text{CDCl}_3$ ):  $\delta$  157.6 (d,  $J$  = 13.4 Hz), 148.1, 134.9, 134.6 (d,  $J$  = 5.2 Hz), 131.6 (d,  $J$  = 67.2 Hz), 131.0 (d,  $J$  = 61.9 Hz), 130.7 (d,  $J$  = 2.1 Hz), 130.4 (d,  $J$  = 8.5 Hz), 130.1 (d,  $J$  = 2.0 Hz), 129.9 (d,  $J$  = 8.8 Hz), 128.9 (d,  $J$  = 5.6 Hz), 127.7 (d,  $J$  = 11.1 Hz), 127.0, 126.9, 125.7 (d,  $J$  = 1.6 Hz), 123.1, 120.2, 45.2 (d,  $J$  = 68.3 Hz), 36.9.  $^{31}\text{P}$  NMR (300 MHz,  $\text{CDCl}_3$ ):  $\delta$  33.2; HRMS (ESI)  $m/z$ : calcd for  $\text{C}_{25}\text{H}_{23}\text{NOP}$   $[\text{M}+\text{H}]^+$  384.1512, found 384.1517.

### (*R*)-(2-(4-methylisoquinolin-1-yl)-1-phenylethyl)diphenylphosphine oxide 3ab

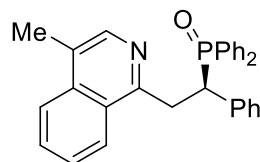

White solid, 75% yield; m.p. 220-221 °C;  $[\alpha]_D^{20}$  = 125.7 ( $c$  = 0.6,  $\text{CHCl}_3$ );  $ee$  was determined to be 78% by HPLC analysis with a Chiralcel OD-H column (hexane/2-propanol 95:5, 1.0 mL/min, 220 nm);  $t_r$  (minor) = 9.16 min,  $t_r$  (major) = 10.38 min;  $^1\text{H}$  NMR (500 MHz,  $\text{CDCl}_3$ ):  $\delta$  8.12 (s, 1H), 8.10 (d,  $J$  = 8.4 Hz, 1H), 8.00-7.96 (m, 2H), 7.79 (d,  $J$  = 8.4 Hz, 1H), 7.59 (t,  $J$  = 7.4 Hz, 1H), 7.51-7.46 (m, 3H), 7.44-7.37 (m, 5H), 7.32-7.29 (m, 1H), 7.24-7.20 (m, 2H), 7.04 (t,  $J$  = 7.1 Hz, 2H), 7.00-6.97 (m, 1H), 4.85-4.81 (m, 1H), 4.18-4.11 (m, 1H), 3.86-3.80 (m, 1H), 2.47 (s, 3H).  $^{13}\text{C}$  NMR (125 MHz,  $\text{CDCl}_3$ ):  $\delta$  156.2 (d,  $J$  = 12.0 Hz), 141.4, 136.5 (d,  $J$  = 5.3 Hz), 135.4, 132.9 (d,  $J$  = 60.1 Hz), 132.6 (d,  $J$  = 63.6 Hz), 131.4 (d,  $J$  = 2.5 Hz), 131.2 (d,  $J$  = 8.5 Hz), 131.1 (d,  $J$  = 2.5 Hz), 131.0 (d,  $J$  = 8.8 Hz), 130.1 (d,  $J$  = 5.6 Hz), 129.5, 128.6 (d,  $J$  = 11.3 Hz), 128.0 (d,  $J$  = 11.7 Hz), 127.9, 126.8, 126.6 (d,  $J$  = 1.8 Hz), 126.5, 125.6, 125.4, 123.5, 44.7 (d,  $J$  = 68.3 Hz), 33.7, 15.9.  $^{31}\text{P}$  NMR (200 MHz,  $\text{CDCl}_3$ ):  $\delta$  34.3; HRMS (ESI)  $m/z$ : calcd for  $\text{C}_{30}\text{H}_{27}\text{NOP}$   $[\text{M}+\text{H}]^+$  448.1825, found 448.1818.

**(R)-(2-(4-bromoisoquinolin-1-yl)-1-phenylethyl)diphenylphosphine oxide 3ac**

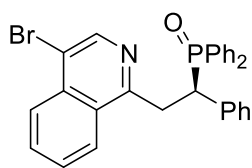

White solid, 78% yield; m.p. 187-188 °C;  $[\alpha]^{20}_{\text{D}} = 111.7$  ( $c = 0.7$ ,  $\text{CHCl}_3$ ); *ee* was determined to be 79% by HPLC analysis with a Chiralcel OD-H column (hexane/2-propanol 95:5, 1.0 mL/min, 210 nm);  $t_{\text{r}}$  (minor) = 7.59 min,  $t_{\text{r}}$  (major) = 8.26 min;  $^1\text{H NMR}$  (500 MHz,  $\text{CDCl}_3$ ):  $\delta$  8.53 (s, 1H), 8.09 (d,  $J = 8.5$  Hz, 1H), 8.01 (d,  $J = 8.4$  Hz, 1H), 7.97-7.93 (m, 2H), 7.65 (t,  $J = 7.8$  Hz, 1H), 7.54-7.47 (m, 3H), 7.43-7.36 (m, 5H), 7.32-7.29 (m, 1H), 7.24-7.20 (m, 2H), 7.06 (t,  $J = 7.1$  Hz, 2H), 7.02-6.99 (m, 1H), 4.79-4.75 (m, 1H), 4.15-4.08 (m, 1H), 3.86-3.80 (m, 1H).  $^{13}\text{C NMR}$  (125 MHz,  $\text{CDCl}_3$ ):  $\delta$  157.7 (d,  $J = 12.3$  Hz), 143.2, 136.2 (d,  $J = 4.9$  Hz), 134.5, 132.6 (d,  $J = 64.2$  Hz), 131.8 (d,  $J = 58.6$  Hz), 131.6 (d,  $J = 2.6$  Hz), 131.2, 131.1, 131.0, 130.9, 130.0 (d,  $J = 5.6$  Hz), 128.6 (d,  $J = 11.5$  Hz), 128.08, 128.06, 127.97, 127.95, 126.8 (d,  $J = 2.2$  Hz), 126.4, 125.4, 118.2, 44.7 (d,  $J = 68.4$  Hz), 33.9.  $^{31}\text{P NMR}$  (200 MHz,  $\text{CDCl}_3$ ):  $\delta$  34.0; HRMS (ESI)  $m/z$ : calcd for  $\text{C}_{29}\text{H}_{24}\text{BrNOP}$   $[\text{M}+\text{H}]^+$  512.0773, found 512.0768.

**(R)-(2-(5-methylisoquinolin-1-yl)-1-phenylethyl)diphenylphosphine oxide 3ad**

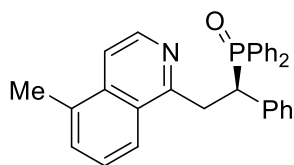

White solid, 77% yield; m.p. 169-170 °C;  $[\alpha]^{20}_{\text{D}} = 153.4$  ( $c = 0.6$ ,  $\text{CHCl}_3$ ); *ee* was determined to be 86% by HPLC analysis with a Chiralcel OD-H column (hexane/2-propanol 95:5, 1.0 mL/min, 220 nm);  $t_{\text{r}}$  (minor) = 9.29 min,  $t_{\text{r}}$  (major) = 10.18 min;  $^1\text{H NMR}$  (500 MHz,  $\text{CDCl}_3$ ):  $\delta$  8.39 (d,  $J = 6.0$  Hz, 1H), 8.04-8.00 (m, 2H), 7.94 (d,  $J = 8.0$  Hz, 1H), 7.53-7.49 (m, 2H), 7.47 (d,  $J = 5.9$  Hz, 1H), 7.43-7.42 (m, 3H), 7.38-7.35 (m, 4H), 7.31-7.28 (m, 1H), 7.23-7.20 (m, 2H), 7.04 (t,  $J = 7.2$  Hz, 2H), 7.00-6.95 (m, 1H), 4.87-4.83 (m, 1H), 4.24-4.17 (m, 1H), 3.86-3.81 (m, 1H), 2.53 (s, 3H).  $^{13}\text{C NMR}$  (125 MHz,  $\text{CDCl}_3$ ):  $\delta$  158.4 (d,  $J = 13.1$  Hz), 141.4, 136.4 (d,  $J = 5.4$  Hz), 135.3, 133.8, 132.8 (d,  $J = 60.9$  Hz), 132.0 (d,  $J = 55.6$  Hz), 131.6 (d,  $J = 2.5$  Hz), 131.4 (d,  $J = 8.4$  Hz), 131.2 (d,  $J = 2.5$  Hz), 131.0 (d,  $J = 8.9$  Hz), 130.1, 130.09 (d,  $J = 1.5$  Hz), 128.7 (d,  $J = 11.5$  Hz), 128.0, 127.9, 127.4, 126.7 (d,  $J = 1.8$  Hz), 126.5, 123.0, 115.8, 44.8 (d,  $J = 68.3$  Hz), 34.0, 19.0.  $^{31}\text{P NMR}$  (200 MHz,  $\text{CDCl}_3$ ):  $\delta$  34.3; HRMS (ESI)  $m/z$ : calcd for  $\text{C}_{30}\text{H}_{27}\text{NOP}$   $[\text{M}+\text{H}]^+$  448.1825, found 448.1818.

**(R)-(2-(6-methylisoquinolin-1-yl)-1-phenylethyl)diphenylphosphine oxide 3ae**

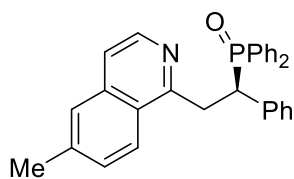

White solid, 73% yield; m.p. 172-173 °C;  $[\alpha]^{20}_{\text{D}} = 167.8$  ( $c = 0.4$ ,  $\text{CHCl}_3$ ); *ee* was determined to be 87% by HPLC analysis with a Chiralcel OD-H column (hexane/2-propanol 96:4, 0.5 mL/min, 220 nm);  $t_{\text{r}}$  (minor) = 19.21 min,  $t_{\text{r}}$  (major) = 20.61 min;  $^1\text{H NMR}$  (500 MHz,  $\text{CDCl}_3$ ):  $\delta$  8.30 (d,  $J = 5.7$  Hz, 1H), 8.05-8.01 (m, 2H), 7.94 (d,  $J = 8.6$  Hz, 1H), 7.53-7.49 (m, 2H), 7.43-7.41 (m, 3H), 7.38-7.36 (m, 3H), 7.30-7.24 (m, 3H), 7.23-7.19 (m, 2H), 7.02 (t,  $J = 7.3$  Hz, 2H), 6.97-6.94 (m, 1H), 4.85-4.81 (m, 1H), 4.20-4.14 (m, 1H), 3.81-3.76 (m,

1H), 2.42 (s, 3H). <sup>13</sup>C NMR (125 MHz, CDCl<sub>3</sub>): δ 157.7 (d, *J* = 12.6 Hz), 141.6, 140.0, 136.3 (d, *J* = 5.4 Hz), 136.2, 132.8 (d, *J* = 59.5 Hz), 132.0 (d, *J* = 54.2 Hz), 131.6 (d, *J* = 2.3 Hz), 131.4 (d, *J* = 8.5 Hz), 131.2 (d, *J* = 2.6 Hz), 131.0 (d, *J* = 8.6 Hz), 130.1 (d, *J* = 5.7 Hz), 129.2, 128.7 (d, *J* = 11.1 Hz), 128.0, 127.9, 126.7 (d, *J* = 2.4 Hz), 125.9, 125.8, 124.8, 118.9, 44.8 (d, *J* = 70.5 Hz), 33.7, 27.1. <sup>31</sup>P NMR (200 MHz, CDCl<sub>3</sub>): δ 34.4; HRMS (ESI) *m/z*: calcd for C<sub>30</sub>H<sub>27</sub>NOP [M+H]<sup>+</sup> 448.1825, found 448.1818.

**(*R*)-(2-(6-methoxyisoquinolin-1-yl)-1-phenylethyl)diphenylphosphine oxide 3af**

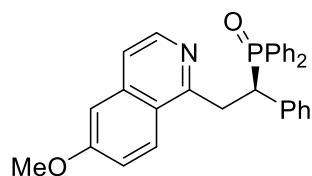

White solid, 82% yield; m.p. 149-150 °C; [ $\alpha$ ]<sub>D</sub><sup>20</sup> = 142.1 (c = 0.6, CHCl<sub>3</sub>); *ee* was determined to be 89% by HPLC analysis with a Chiralcel AD-H column (hexane/2-propanol 80:20, 1.0 mL/min, 230 nm); *t<sub>r</sub>* (major) = 20.40 min, *t<sub>r</sub>* (minor) = 24.18 min; <sup>1</sup>H NMR (500 MHz, CDCl<sub>3</sub>): δ 8.28 (d, *J* = 5.7 Hz, 1H), 8.04-8.00 (m, 2H), 7.96 (d, *J* = 9.3 Hz, 1H), 7.52-7.50 (m, 2H), 7.44-7.42 (m, 3H), 7.36-7.32 (m, 2H), 7.31-7.27 (m, 1H), 7.25-7.19 (m, 3H), 7.08 (dd, *J* = 9.3, 2.5 Hz, 1H), 7.02 (t, *J* = 7.1 Hz, 2H), 6.98-6.95 (m, 1H), 6.88 (d, *J* = 2.5 Hz, 1H), 4.86-4.76 (m, 1H), 4.14-4.08 (m, 1H), 3.84 (s, 3H), 3.79-3.73 (m, 1H). <sup>13</sup>C NMR (125 MHz, CDCl<sub>3</sub>): δ 160.2, 157.6 (d, *J* = 12.6 Hz), 142.2, 138.0, 136.3 (d, *J* = 5.1 Hz), 132.9 (d, *J* = 63.0 Hz), 132.1 (d, *J* = 58.2 Hz), 131.6 (d, *J* = 2.6 Hz), 131.4 (d, *J* = 8.5 Hz), 131.1 (d, *J* = 2.6 Hz), 131.0 (d, *J* = 8.6 Hz), 130.1 (d, *J* = 5.7 Hz), 128.6 (d, *J* = 11.0 Hz), 128.0, 127.9, 126.9, 126.7 (d, *J* = 2.3 Hz), 123.2, 119.6, 118.7, 104.6, 55.4, 45.0 (d, *J* = 68.2 Hz), 33.8. <sup>31</sup>P NMR (200 MHz, CDCl<sub>3</sub>): δ 34.1; HRMS (ESI) *m/z*: calcd for C<sub>30</sub>H<sub>27</sub>NO<sub>2</sub>P [M+H]<sup>+</sup> 464.1774, found 464.1767.

**(*R*)-(2-(6-fluoroisoquinolin-1-yl)-1-phenylethyl)diphenylphosphine oxide 3ag**

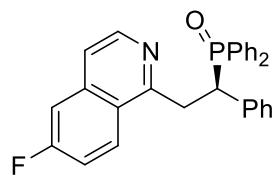

White solid, 88% yield; m.p. 167-168 °C; [ $\alpha$ ]<sub>D</sub><sup>20</sup> = 105.0 (c = 0.5, CHCl<sub>3</sub>); *ee* was determined to be 82% by HPLC analysis with a Chiralcel OD-H column (hexane/2-propanol 97:3, 1.0 mL/min, 220 nm); *t<sub>r</sub>* (minor) = 10.29 min, *t<sub>r</sub>* (major) = 10.94 min; <sup>1</sup>H NMR (500 MHz, CDCl<sub>3</sub>): δ 8.34 (d, *J* = 5.7 Hz, 1H), 8.08 (dd, *J* = 9.1, 5.4 Hz, 1H), 8.01-7.98 (m, 2H), 7.54-7.50 (m, 3H), 7.39-7.38 (m, 5H), 7.27-7.24 (m, 1H), 7.19-7.14 (m, 4H), 7.02 (t, *J* = 7.3 Hz, 2H), 6.97-6.94 (m, 1H), 4.82-4.78 (m, 1H), 4.17-4.11 (m, 1H), 3.86-3.80 (m, 1H). <sup>13</sup>C NMR (125 MHz, CDCl<sub>3</sub>): δ 163.7 (d, *J* = 253.1 Hz), 161.7, 158.2 (d, *J* = 11.9 Hz), 142.5, 137.6 (d, *J* = 10.4 Hz), 136.6 (d, *J* = 5.3 Hz), 132.6 (d, *J* = 54.3 Hz), 131.8 (d, *J* = 49.0 Hz), 131.6 (d, *J* = 2.4 Hz), 131.3, 131.2 (d, *J* = 3.9 Hz), 131.0 (d, *J* = 8.8 Hz), 130.0 (d, *J* = 5.9 Hz), 128.7 (d, *J* = 11.4 Hz), 128.4 (d, *J* = 9.4 Hz), 128.1, 128.0, 126.8 (d, *J* = 1.6 Hz), 125.7, 119.1 (d, *J* = 4.9 Hz), 117.4 (d, *J* = 25.0 Hz), 110.2 (d, *J* = 20.3 Hz), 44.9 (d, *J* = 67.4 Hz), 34.1. <sup>31</sup>P NMR (200 MHz, CDCl<sub>3</sub>): δ 34.2; <sup>19</sup>F NMR (376 MHz, CDCl<sub>3</sub>): δ -108.5; HRMS (ESI) *m/z*: calcd for C<sub>29</sub>H<sub>24</sub>FNOP [M+H]<sup>+</sup> 452.1574, found 452.1567.

**(R)-(2-(6-bromoisoquinolin-1-yl)-1-phenylethyl)diphenylphosphine oxide 3ah**

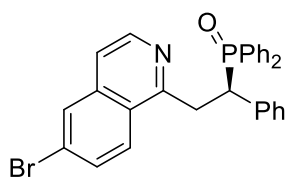

White solid, 93% yield; m.p. 196-197 °C;  $[\alpha]_D^{20} = 130.3$  ( $c = 0.7$ ,  $\text{CHCl}_3$ ); *ee* was determined to be 82% by HPLC analysis with a Chiralcel OD-H column (hexane/2-propanol 95:5, 1.0 mL/min, 220 nm);  $t_r$  (minor) = 9.52 min,  $t_r$  (major) = 10.21 min;  $^1\text{H NMR}$  (500 MHz,  $\text{CDCl}_3$ ):  $\delta$  8.57 (d,  $J = 5.7$  Hz, 1H), 8.01-7.98 (m, 2H), 7.90 (d,  $J = 9.0$  Hz, 1H), 7.74 (s, 1H), 7.51-7.47 (m, 3H), 7.41 (s, 3H), 7.36 (d,  $J = 7.4$  Hz, 2H), 7.29-7.267 (m, 1H), 7.21-7.18 (m, 3H), 7.02 (t,  $J = 7.3$  Hz, 2H), 6.98-6.95 (m, 1H), 4.78-4.74 (m, 1H), 4.14-4.08 (m, 1H), 3.82-3.77 (m, 1H).  $^{13}\text{C NMR}$  (125 MHz,  $\text{CDCl}_3$ ):  $\delta$  158.5 (d,  $J = 12.4$  Hz), 142.6, 137.0, 136.2 (d,  $J = 5.3$  Hz), 132.6 (d,  $J = 52.5$  Hz), 131.8 (d,  $J = 46.6$  Hz), 131.7 (d,  $J = 2.2$  Hz), 131.3, 131.25, 131.22, 131.0 (d,  $J = 8.7$  Hz), 130.4, 130.0 (d,  $J = 5.7$  Hz), 129.1, 128.1, 128.0, 126.8, 126.7, 125.8, 124.5, 118.3, 45.0 (d,  $J = 68.0$  Hz), 44.5.  $^{31}\text{P NMR}$  (200 MHz,  $\text{CDCl}_3$ ):  $\delta$  34.0; HRMS (ESI)  $m/z$ : calcd for  $\text{C}_{29}\text{H}_{24}\text{BrNOP}$   $[\text{M}+\text{H}]^+$  512.0773, found 512.0768.

**(R)-(2-(isoquinolin-1-yl)-1-phenylethyl)di-p-tolylphosphine oxide 3ai**

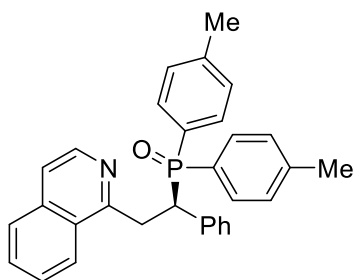

White solid, 97% yield; m.p. 190-191 °C;  $[\alpha]_D^{20} = 144.0$  ( $c = 0.6$ ,  $\text{CHCl}_3$ ); *ee* was determined to be 88% by HPLC analysis with a Chiralcel OD-H column (hexane/2-propanol 95:5, 1.0 mL/min, 220 nm);  $t_r$  (minor) = 8.59 min,  $t_r$  (major) = 9.60 min;  $^1\text{H NMR}$  (500 MHz,  $\text{CDCl}_3$ ):  $\delta$  8.35 (d,  $J = 5.7$  Hz, 1H), 7.90-7.86 (m, 2H), 7.61 (d,  $J = 8.0$  Hz, 1H), 7.51-7.48 (m, 1H), 7.41 (s, 3H), 7.43-7.38 (m, 5H), 7.32 (d,  $J = 5.6$  Hz, 1H), 7.21-7.19 (m, 2H), 7.04-7.00 (m, 4H), 6.98-6.95 (m, 1H), 4.81-4.77 (m, 1H), 4.20-4.13 (m, 1H), 3.85-3.79 (m, 1H), 2.29 (s, 3H), 2.21 (s, 3H).  $^{13}\text{C NMR}$  (125 MHz,  $\text{CDCl}_3$ ):  $\delta$  158.3 (d,  $J = 12.5$  Hz), 141.9 (d,  $J = 2.7$  Hz), 141.5, 141.4 (d,  $J = 2.7$  Hz), 136.7 (d,  $J = 5.3$  Hz), 135.9, 131.1 (d,  $J = 8.6$  Hz), 131.0 (d,  $J = 9.0$  Hz), 130.14, 130.09, 129.7 (d,  $J = 64.7$  Hz), 129.4 (d,  $J = 11.4$  Hz), 128.9 (d,  $J = 59.9$  Hz), 128.8, 128.7, 127.9, 127.4, 127.0 (d,  $J = 6.4$  Hz), 126.6 (d,  $J = 2.1$  Hz), 125.0, 119.3, 45.0 (d,  $J = 68.1$  Hz), 34.0, 21.52, 21.47.  $^{31}\text{P NMR}$  (200 MHz,  $\text{CDCl}_3$ ):  $\delta$  34.6; HRMS (ESI)  $m/z$ : calcd for  $\text{C}_{31}\text{H}_{29}\text{NOP}$   $[\text{M}+\text{H}]^+$  462.1981, found 462.1976.

**(R)-bis(3,5-dimethylphenyl)(2-(isoquinolin-1-yl)-1-phenylethyl)phosphine oxide 3aj**

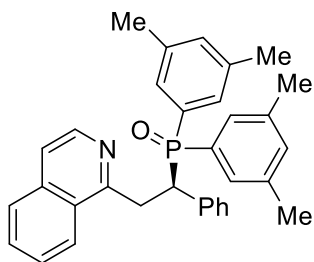

White solid, 91% yield; m.p. 74-75 °C;  $[\alpha]_D^{20} = 119.5$  ( $c = 0.8$ ,  $\text{CHCl}_3$ ); *ee* was determined to be 86% by HPLC analysis with a Chiralcel IC column (hexane/2-propanol 90:10, 1.0 mL/min, 220 nm);  $t_r$  (major) = 26.24 min,  $t_r$  (minor) = 29.48 min;  $^1\text{H NMR}$  (500 MHz,  $\text{CDCl}_3$ ):  $\delta$  8.33 (d,  $J = 5.6$  Hz, 1H), 8.06 (d,  $J = 8.3$  Hz, 1H), 7.60-7.55 (m, 3H), 7.49 (t,  $J = 7.5$  Hz, 1H), 7.44-7.39 (m, 3H), 7.29 (d,  $J = 5.5$  Hz, 1H), 7.10 (d,  $J = 11.5$  Hz, 2H), 7.05 (t,  $J = 7.4$  Hz, 1H), 7.00-6.97 (m, 2H),

6.88 (s, 1H), 4.76-4.72 (m, 1H), 4.14-4.07 (m, 1H), 3.92-3.86 (m, 1H), 2.26 (s, 6H), 2.14 (s, 6H). <sup>13</sup>C NMR (125 MHz, CDCl<sub>3</sub>): δ 158.4 (d, *J* = 11.6 Hz), 141.4, 138.2 (d, *J* = 11.7 Hz), 137.5 (d, *J* = 12.0 Hz), 136.9 (d, *J* = 5.3 Hz), 135.9, 133.3 (d, *J* = 2.53 Hz), 132.9 (d, *J* = 2.6 Hz), 132.4 (d, *J* = 55.1 Hz), 131.7 (d, *J* = 49.3 Hz), 130.1 (d, *J* = 5.7 Hz), 129.6, 129.0 (d, *J* = 8.9 Hz), 128.7 (d, *J* = 8.54 Hz), 127.9, 127.3, 127.0, 126.9, 126.6 (d, *J* = 1.7 Hz), 125.1, 119.4, 45.0 (d, *J* = 67.4 Hz), 34.0, 21.3, 21.2. <sup>31</sup>P NMR (200 MHz, CDCl<sub>3</sub>): δ 34.6; HRMS (ESI) *m/z*: calcd for C<sub>33</sub>H<sub>3</sub>NOP [M+H]<sup>+</sup> 490.2294, found 490.2287.

## 6. References

- [1] J. Pattison, G. Piraux, H. W. Lam, *J. Am. Chem. Soc.* **2010**, *132*, 14373-14375.  
 [2] Z. Jamal, Y.-C. Teo, *Synlett* **2014**, *25*, 2409-2053.  
 [3] T. Guo, Y. Liu, Y.-H. Zhao, P.-K. Zhang, S.-L. Han, H.-L. Zhao, *Tetrahedron Lett.* **2016**, *57*, 3920-3923.  
 [4] Z. Zhang, C. Pi, T. Tong, X. Cui, Y. Wu, *Org. Lett.* **2017**, *19*, 440-443.  
 [5] B. Feng, H.-G. Cheng, J.-R. Chen, Q.-H. Deng, L.-Q. Lu, W.-J. Xiao, *Chem. Commun.* **2014**, *50*, 9550-9553.

## 7. Crystal data and structure refinement of 3e

### Crystal data and structure refinement of 3e

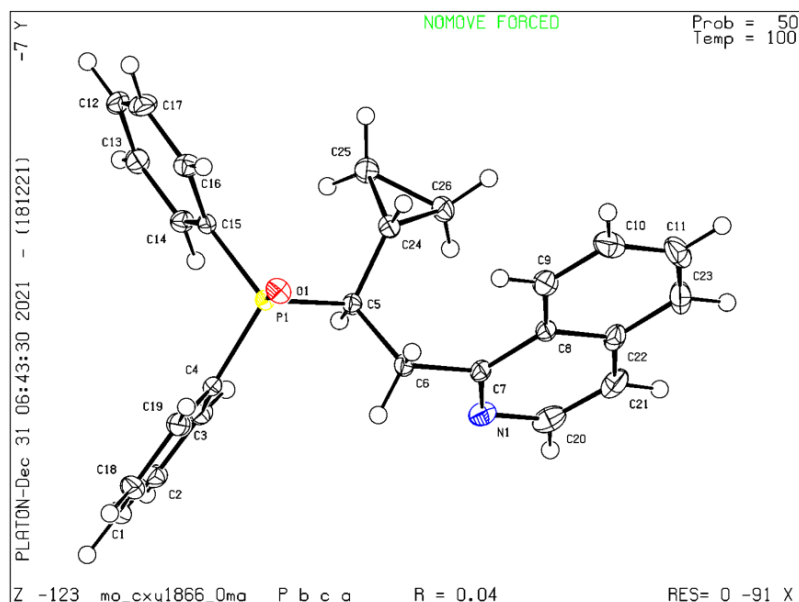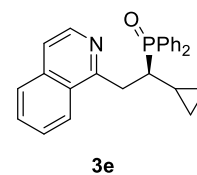

**Table S1.** Crystal data and structure refinement for cxy1866 (18 Dec. 2021).

|                     |                                     |
|---------------------|-------------------------------------|
| Identification code | mo_cxy1866_0ma                      |
| Empirical formula   | C <sub>26</sub> H <sub>24</sub> NOP |

|                                                        |                                                               |
|--------------------------------------------------------|---------------------------------------------------------------|
| Formula weight                                         | 397.43                                                        |
| Temperature/K                                          | 100.0                                                         |
| Crystal system                                         | orthorhombic                                                  |
| Space group                                            | Pbca                                                          |
| a/Å                                                    | 18.1535(9)                                                    |
| b/Å                                                    | 11.2621(5)                                                    |
| c/Å                                                    | 20.3773(10)                                                   |
| $\alpha$ /°                                            | 90                                                            |
| $\beta$ /°                                             | 90                                                            |
| $\gamma$ /°                                            | 90                                                            |
| Volume/Å <sup>3</sup>                                  | 4166.1(3)                                                     |
| Z                                                      | 8                                                             |
| $\rho_{\text{calc}}/\text{cm}^3$                       | 1.267                                                         |
| $\mu/\text{mm}^{-1}$                                   | 0.149                                                         |
| F(000)                                                 | 1680.0                                                        |
| Crystal size/mm <sup>3</sup>                           | 0.42 × 0.39 × 0.38                                            |
| Radiation                                              | MoK $\alpha$ ( $\lambda = 0.71073$ )                          |
| 2 $\theta$ range for data collection/° 3.998 to 61.222 |                                                               |
| Index ranges                                           | -25 ≤ h ≤ 25, -16 ≤ k ≤ 16, -29 ≤ l ≤ 29                      |
| Reflections collected                                  | 112968                                                        |
| Independent reflections                                | 6399 [R <sub>int</sub> = 0.0782, R <sub>sigma</sub> = 0.0305] |
| Data/restraints/parameters                             | 6399/0/262                                                    |
| Goodness-of-fit on F <sup>2</sup>                      | 1.025                                                         |
| Final R indexes [I ≥ 2 $\sigma$ (I)]                   | R <sub>1</sub> = 0.0414, wR <sub>2</sub> = 0.0988             |
| Final R indexes [all data]                             | R <sub>1</sub> = 0.0640, wR <sub>2</sub> = 0.1101             |
| Largest diff. peak/hole / e Å <sup>-3</sup>            | 0.40/-0.40                                                    |

**Table 2** Fractional Atomic Coordinates ( $\times 10^4$ ) and Equivalent Isotropic Displacement Parameters ( $\text{\AA}^2 \times 10^3$ ) for mo\_cxy1866\_0ma.  $U_{\text{eq}}$  is defined as 1/3 of the trace of the orthogonalised  $U_{ij}$  tensor.

| Atom | x         | y         | z         | U(eq)    |
|------|-----------|-----------|-----------|----------|
| P1   | 2531.3(2) | 5010.3(3) | 3016.1(2) | 11.37(8) |

| Atom | x         | y          | z         | U(eq)     |
|------|-----------|------------|-----------|-----------|
| O1   | 2431.6(5) | 6301.9(8)  | 3151.7(4) | 17.20(19) |
| N1   | 621.4(6)  | 2764.6(10) | 4063.9(6) | 21.1(2)   |
| C1   | 1636.9(8) | 4062.9(14) | 974.0(7)  | 24.4(3)   |
| C2   | 1821.5(7) | 3154.9(12) | 1403.0(7) | 21.4(3)   |
| C3   | 2064.1(7) | 3414.4(11) | 2035.0(6) | 16.7(2)   |
| C4   | 2135.6(6) | 4596.4(11) | 2235.1(6) | 13.3(2)   |
| C5   | 2110.2(7) | 4058.8(11) | 3636.1(6) | 14.0(2)   |
| C6   | 1301.0(7) | 4476.8(12) | 3719.7(6) | 16.7(2)   |
| C7   | 899.4(7)  | 3792.9(11) | 4247.7(6) | 15.4(2)   |
| C8   | 848.3(7)  | 4226.2(11) | 4906.8(6) | 15.7(2)   |
| C9   | 1153.4(7) | 5322.0(12) | 5119.3(7) | 21.0(3)   |
| C10  | 1101.6(9) | 5663.7(14) | 5761.6(8) | 28.9(3)   |
| C11  | 733.0(9)  | 4949.3(16) | 6223.2(7) | 32.3(4)   |
| C12  | 4998.6(7) | 4136.4(13) | 2894.1(7) | 22.6(3)   |
| C13  | 4489.0(7) | 3248.4(12) | 2765.6(6) | 20.2(3)   |
| C14  | 3738.8(7) | 3483.9(11) | 2802.0(6) | 16.4(2)   |
| C15  | 3495.6(7) | 4624.0(11) | 2961.0(6) | 12.6(2)   |
| C16  | 4008.0(7) | 5515.8(12) | 3087.5(6) | 18.5(3)   |
| C17  | 4757.2(8) | 5261.9(13) | 3056.7(7) | 23.6(3)   |
| C18  | 1682.0(8) | 5232.9(13) | 1177.2(7) | 23.0(3)   |
| C19  | 1933.9(7) | 5502.0(12) | 1803.6(6) | 17.8(2)   |
| C20  | 276.4(8)  | 2082.6(13) | 4525.5(8) | 26.6(3)   |
| C21  | 197.5(8)  | 2404.5(13) | 5163.8(8) | 26.6(3)   |
| C22  | 484.7(7)  | 3505.9(12) | 5375.8(7) | 20.7(3)   |
| C23  | 431.7(8)  | 3901.0(15) | 6035.8(7) | 29.9(3)   |
| C24  | 2545.0(7) | 4099.0(12) | 4268.6(6) | 17.2(2)   |
| C25  | 3190.7(8) | 3275.6(14) | 4375.6(7) | 24.1(3)   |
| C26  | 2484.7(8) | 3076.7(13) | 4744.3(7) | 23.2(3)   |

**Table 3** Anisotropic Displacement Parameters ( $\text{\AA}^2 \times 10^3$ ) for cxy0894\_0m. The Anisotropic displacement factor exponent takes the form:  $-2\pi^2[h^2a^2U_{11}+2hka*b*U_{12}+\dots]$ .

| Atom | U <sub>11</sub> | U <sub>22</sub> | U <sub>33</sub> | U <sub>23</sub> | U <sub>13</sub> | U <sub>12</sub> |
|------|-----------------|-----------------|-----------------|-----------------|-----------------|-----------------|
| P1   | 12.69(14)       | 10.66(14)       | 10.75(13)       | -0.36(10)       | 0.34(11)        | 1.48(10)        |
| O1   | 22.1(5)         | 12.1(4)         | 17.4(4)         | -2.3(3)         | -0.8(4)         | 3.2(3)          |
| N1   | 16.8(5)         | 20.9(6)         | 25.7(6)         | -3.2(5)         | -1.2(5)         | 0.5(4)          |
| C1   | 19.5(6)         | 38.8(8)         | 15.0(6)         | -4.8(6)         | -1.3(5)         | -4.8(6)         |
| C2   | 16.9(6)         | 25.3(7)         | 22.0(6)         | -9.0(5)         | 0.0(5)          | -2.5(5)         |
| C3   | 13.4(5)         | 17.7(6)         | 19.0(6)         | -2.1(5)         | 1.1(5)          | -0.5(4)         |



|     |         |          |         |          |         |         |
|-----|---------|----------|---------|----------|---------|---------|
| C4  | 10.4(5) | 16.4(5)  | 13.0(5) | -0.8(4)  | 1.0(4)  | -1.0(4) |
| C5  | 13.1(5) | 16.6(5)  | 12.3(5) | 0.9(4)   | 1.2(4)  | 2.2(4)  |
| C6  | 14.1(6) | 22.8(6)  | 13.3(5) | 1.7(5)   | 1.8(4)  | 3.7(5)  |
| C7  | 12.0(5) | 18.4(6)  | 15.8(5) | -0.1(5)  | 1.7(4)  | 3.8(4)  |
| C8  | 12.1(5) | 20.3(6)  | 14.7(5) | 1.0(5)   | 0.9(4)  | 4.8(4)  |
| C9  | 19.1(6) | 22.6(6)  | 21.4(6) | -2.5(5)  | 0.6(5)  | 4.7(5)  |
| C10 | 26.4(7) | 34.1(8)  | 26.1(7) | -12.3(6) | -5.3(6) | 10.9(6) |
| C11 | 33.1(8) | 47.5(10) | 16.3(6) | -5.2(6)  | -0.4(6) | 19.3(7) |
| C12 | 12.8(6) | 36.5(8)  | 18.5(6) | 7.6(6)   | -0.1(5) | 2.2(5)  |
| C13 | 19.0(6) | 23.6(6)  | 18.0(6) | 0.3(5)   | 0.6(5)  | 7.4(5)  |
| C14 | 15.6(6) | 16.3(6)  | 17.3(6) | -1.1(5)  | -0.7(5) | 1.1(4)  |
| C15 | 13.1(5) | 13.9(5)  | 10.8(5) | 0.9(4)   | 0.2(4)  | -1.3(4) |
| C16 | 18.9(6) | 16.0(6)  | 20.7(6) | 1.7(5)   | -2.8(5) | -2.8(5) |
| C17 | 17.2(6) | 27.8(7)  | 25.9(7) | 6.5(6)   | -4.5(5) | -8.5(5) |
| C18 | 21.2(7) | 32.1(7)  | 15.6(6) | 5.5(5)   | -2.7(5) | -4.2(5) |
| C19 | 17.8(6) | 18.6(6)  | 17.1(6) | 1.8(5)   | -0.8(5) | -2.1(5) |
| C20 | 19.3(7) | 19.8(6)  | 40.8(9) | 1.3(6)   | -2.4(6) | -2.5(5) |
| C21 | 16.3(6) | 28.7(7)  | 34.8(8) | 12.5(6)  | 4.3(6)  | 1.0(5)  |
| C22 | 14.1(6) | 27.0(7)  | 21.0(6) | 7.0(5)   | 4.0(5)  | 7.3(5)  |
| C23 | 25.5(7) | 44.8(9)  | 19.3(7) | 10.6(6)  | 7.7(6)  | 15.4(7) |
| C24 | 16.9(6) | 20.6(6)  | 14.2(5) | 0.4(5)   | 0.2(5)  | 1.1(5)  |
| C25 | 17.4(6) | 35.9(8)  | 18.9(6) | 7.5(6)   | -0.3(5) | 7.4(6)  |
| C26 | 20.7(6) | 33.5(8)  | 15.5(6) | 9.4(5)   | 0.2(5)  | 2.7(6)  |

**Table 4** Bond Lengths for mo\_cxy1866\_0ma.

| Atom | Atom | Length/Å   |  | Atom | Atom | Length/Å   |
|------|------|------------|--|------|------|------------|
| P1   | O1   | 1.4917(9)  |  | C9   | C10  | 1.368(2)   |
| P1   | C4   | 1.8072(12) |  | C10  | C11  | 1.407(2)   |
| P1   | C5   | 1.8244(12) |  | C11  | C23  | 1.356(2)   |
| P1   | C15  | 1.8073(12) |  | C12  | C13  | 1.387(2)   |
| N1   | C7   | 1.3175(17) |  | C12  | C17  | 1.381(2)   |
| N1   | C20  | 1.3665(19) |  | C13  | C14  | 1.3895(18) |
| C1   | C2   | 1.386(2)   |  | C14  | C15  | 1.3959(17) |
| C1   | C18  | 1.384(2)   |  | C15  | C16  | 1.3930(17) |
| C2   | C3   | 1.3921(18) |  | C16  | C17  | 1.3912(19) |
| C3   | C4   | 1.3983(17) |  | C18  | C19  | 1.3894(18) |
| C4   | C19  | 1.3954(17) |  | C20  | C21  | 1.358(2)   |
| C5   | C6   | 1.5520(17) |  | C21  | C22  | 1.413(2)   |

|    |     |            |  |     |     |            |
|----|-----|------------|--|-----|-----|------------|
| C5 | C24 | 1.5120(17) |  | C22 | C23 | 1.420(2)   |
| C6 | C7  | 1.5107(17) |  | C24 | C25 | 1.5104(18) |
| C7 | C8  | 1.4321(17) |  | C24 | C26 | 1.5090(18) |
| C8 | C9  | 1.4202(19) |  | C25 | C26 | 1.5023(19) |
| C8 | C22 | 1.4166(18) |  |     |     |            |

**Table 5** Bond Angles for mo\_cxy1866\_0ma.

| Atom | Atom | Atom | Angle/°    |  | Atom | Atom | Atom | Angle/°    |
|------|------|------|------------|--|------|------|------|------------|
| O1   | P1   | C4   | 111.49(6)  |  | C9   | C10  | C11  | 120.77(15) |
| O1   | P1   | C5   | 113.18(5)  |  | C23  | C11  | C10  | 120.09(14) |
| O1   | P1   | C15  | 111.33(6)  |  | C17  | C12  | C13  | 119.69(12) |
| C4   | P1   | C5   | 106.97(6)  |  | C12  | C13  | C14  | 120.39(12) |
| C4   | P1   | C15  | 105.56(5)  |  | C13  | C14  | C15  | 119.87(12) |
| C15  | P1   | C5   | 107.91(5)  |  | C14  | C15  | P1   | 122.83(9)  |
| C7   | N1   | C20  | 118.29(12) |  | C16  | C15  | P1   | 117.50(10) |
| C18  | C1   | C2   | 119.96(13) |  | C16  | C15  | C14  | 119.67(12) |
| C1   | C2   | C3   | 120.33(12) |  | C17  | C16  | C15  | 119.76(13) |
| C2   | C3   | C4   | 119.93(12) |  | C12  | C17  | C16  | 120.63(13) |
| C3   | C4   | P1   | 122.63(9)  |  | C1   | C18  | C19  | 120.14(13) |
| C19  | C4   | P1   | 118.08(9)  |  | C18  | C19  | C4   | 120.39(12) |
| C19  | C4   | C3   | 119.19(12) |  | C21  | C20  | N1   | 123.89(14) |
| C6   | C5   | P1   | 107.12(8)  |  | C20  | C21  | C22  | 119.23(13) |
| C24  | C5   | P1   | 110.73(9)  |  | C8   | C22  | C23  | 119.41(14) |
| C24  | C5   | C6   | 113.04(10) |  | C21  | C22  | C8   | 117.93(13) |
| C7   | C6   | C5   | 112.35(10) |  | C21  | C22  | C23  | 122.66(13) |
| N1   | C7   | C6   | 115.50(11) |  | C11  | C23  | C22  | 120.81(14) |
| N1   | C7   | C8   | 122.77(12) |  | C25  | C24  | C5   | 120.65(11) |
| C8   | C7   | C6   | 121.70(11) |  | C26  | C24  | C5   | 119.13(11) |
| C9   | C8   | C7   | 123.83(12) |  | C26  | C24  | C25  | 59.68(9)   |
| C22  | C8   | C7   | 117.88(12) |  | C26  | C25  | C24  | 60.12(9)   |
| C22  | C8   | C9   | 118.28(12) |  | C25  | C26  | C24  | 60.21(9)   |
| C10  | C9   | C8   | 120.63(14) |  |      |      |      |            |

**Table 6** Torsion Angles for mo\_cxy1866\_0ma.

| A  | B  | C   | D   | Angle/°    |  | A  | B  | C   | D   | Angle/°     |
|----|----|-----|-----|------------|--|----|----|-----|-----|-------------|
| P1 | C4 | C19 | C18 | 174.88(10) |  | C6 | C5 | C24 | C26 | 82.98(14)   |
| P1 | C5 | C6  | C7  | -177.20(9) |  | C6 | C7 | C8  | C9  | 0.95(19)    |
| P1 | C5 | C24 | C25 | -86.79(13) |  | C6 | C7 | C8  | C22 | -177.71(11) |

|    |     |     |     |             |     |     |     |     |             |
|----|-----|-----|-----|-------------|-----|-----|-----|-----|-------------|
| P1 | C5  | C24 | C26 | -156.82(10) | C7  | N1  | C20 | C21 | 0.5(2)      |
| P1 | C15 | C16 | C17 | 179.49(10)  | C7  | C8  | C9  | C10 | -178.09(13) |
| O1 | P1  | C4  | C3  | -170.82(10) | C7  | C8  | C22 | C21 | 0.17(18)    |
| O1 | P1  | C4  | C19 | 12.88(12)   | C7  | C8  | C22 | C23 | 179.22(12)  |
| O1 | P1  | C5  | C6  | 51.50(10)   | C8  | C9  | C10 | C11 | -1.2(2)     |
| O1 | P1  | C5  | C24 | -72.18(10)  | C8  | C22 | C23 | C11 | -0.9(2)     |
| O1 | P1  | C15 | C14 | -176.39(10) | C9  | C8  | C22 | C21 | -178.57(12) |
| O1 | P1  | C15 | C16 | 3.90(11)    | C9  | C8  | C22 | C23 | 0.49(18)    |
| N1 | C7  | C8  | C9  | 178.96(12)  | C9  | C10 | C11 | C23 | 0.8(2)      |
| N1 | C7  | C8  | C22 | 0.30(18)    | C10 | C11 | C23 | C22 | 0.2(2)      |
| N1 | C20 | C21 | C22 | 0.0(2)      | C12 | C13 | C14 | C15 | 0.8(2)      |
| C1 | C2  | C3  | C4  | -1.21(19)   | C13 | C12 | C17 | C16 | -0.5(2)     |
| C1 | C18 | C19 | C4  | -0.7(2)     | C13 | C14 | C15 | P1  | 179.76(10)  |
| C2 | C1  | C18 | C19 | 2.0(2)      | C13 | C14 | C15 | C16 | -0.53(18)   |
| C2 | C3  | C4  | P1  | -173.76(10) | C14 | C15 | C16 | C17 | -0.23(19)   |
| C2 | C3  | C4  | C19 | 2.49(18)    | C15 | P1  | C4  | C3  | 68.15(11)   |
| C3 | C4  | C19 | C18 | -1.55(19)   | C15 | P1  | C4  | C19 | -108.15(10) |
| C4 | P1  | C5  | C6  | -71.68(9)   | C15 | P1  | C5  | C6  | 175.16(8)   |
| C4 | P1  | C5  | C24 | 164.64(8)   | C15 | P1  | C5  | C24 | 51.48(10)   |
| C4 | P1  | C15 | C14 | -55.26(11)  | C15 | C16 | C17 | C12 | 0.8(2)      |
| C4 | P1  | C15 | C16 | 125.03(10)  | C17 | C12 | C13 | C14 | -0.2(2)     |
| C5 | P1  | C4  | C3  | -46.60(12)  | C18 | C1  | C2  | C3  | -1.1(2)     |
| C5 | P1  | C4  | C19 | 137.10(10)  | C20 | N1  | C7  | C6  | 177.50(11)  |
| C5 | P1  | C15 | C14 | 58.84(11)   | C20 | N1  | C7  | C8  | -0.63(19)   |
| C5 | P1  | C15 | C16 | -120.87(10) | C20 | C21 | C22 | C8  | -0.3(2)     |
| C5 | C6  | C7  | N1  | -83.20(14)  | C20 | C21 | C22 | C23 | -179.31(14) |
| C5 | C6  | C7  | C8  | 94.95(14)   | C21 | C22 | C23 | C11 | 178.12(14)  |
| C5 | C24 | C25 | C26 | -108.00(14) | C22 | C8  | C9  | C10 | 0.56(19)    |
| C5 | C24 | C26 | C25 | 110.49(13)  | C24 | C5  | C6  | C7  | -54.95(14)  |
| C6 | C5  | C24 | C25 | 153.00(12)  |     |     |     |     |             |

**Table 7** Hydrogen Atom Coordinates ( $\text{\AA} \times 10^4$ ) and Isotropic Displacement Parameters ( $\text{\AA}^2 \times 10^3$ ) for mo\_cxyl866\_0ma.

| Atom | x       | y       | z       | U(eq) |
|------|---------|---------|---------|-------|
| H1   | 1479.48 | 3881.79 | 540.77  | 29    |
| H2   | 1782.28 | 2351.7  | 1264.95 | 26    |
| H3   | 2180.99 | 2789.07 | 2330.04 | 20    |
| H5   | 2108.26 | 3223.51 | 3469.66 | 17    |
| H6A  | 1296.8  | 5332.02 | 3831.96 | 20    |

|      |         |         |         |    |
|------|---------|---------|---------|----|
| H6B  | 1037.56 | 4377.62 | 3297.84 | 20 |
| H9   | 1395.71 | 5822.29 | 4812.23 | 25 |
| H10  | 1317.05 | 6391.87 | 5897.76 | 35 |
| H11  | 695.23  | 5201.73 | 6666.76 | 39 |
| H12  | 5511.07 | 3971.42 | 2870.32 | 27 |
| H13  | 4653.95 | 2474.62 | 2652.1  | 24 |
| H14  | 3392.06 | 2870.25 | 2718.9  | 20 |
| H16  | 3846.47 | 6294.47 | 3194.43 | 22 |
| H17  | 5106.13 | 5868.33 | 3148.39 | 28 |
| H18  | 1540.4  | 5853.63 | 887.78  | 28 |
| H19  | 1968.96 | 6307.18 | 1939.01 | 21 |
| H20  | 80.15   | 1338.89 | 4391.98 | 32 |
| H21  | -47.89  | 1895.31 | 5464.33 | 32 |
| H23  | 182.13  | 3425.08 | 6350.03 | 36 |
| H24  | 2592.48 | 4902.14 | 4473.56 | 21 |
| H25A | 3315.49 | 2711.78 | 4019.86 | 29 |
| H25B | 3618.19 | 3585.49 | 4623.88 | 29 |
| H26A | 2479.03 | 3264.09 | 5218.92 | 28 |
| H26B | 2176.35 | 2390.43 | 4614.94 | 28 |

### Crystal structure determination of [mo\_cxy1866\_0ma]

**Crystal Data** for  $C_{26}H_{24}NOP$  ( $M = 397.43$  g/mol): orthorhombic, space group  $Pbca$  (no. 61),  $a = 18.1535(9)$  Å,  $b = 11.2621(5)$  Å,  $c = 20.3773(10)$  Å,  $V = 4166.1(3)$  Å<sup>3</sup>,  $Z = 8$ ,  $T = 100.0$  K,  $\mu(\text{MoK}\alpha) = 0.149$  mm<sup>-1</sup>,  $D_{\text{calc}} = 1.267$  g/cm<sup>3</sup>, 112968 reflections measured ( $3.998^\circ \leq 2\Theta \leq 61.222^\circ$ ), 6399 unique ( $R_{\text{int}} = 0.0782$ ,  $R_{\text{sigma}} = 0.0305$ ) which were used in all calculations. The final  $R_1$  was 0.0414 ( $I > 2\sigma(I)$ ) and  $wR_2$  was 0.1101 (all data).

8. Copies of  $^1\text{H}$  NMR,  $^{13}\text{C}$  NMR,  $^{19}\text{F}$  NMR and HPLC spectra of the products

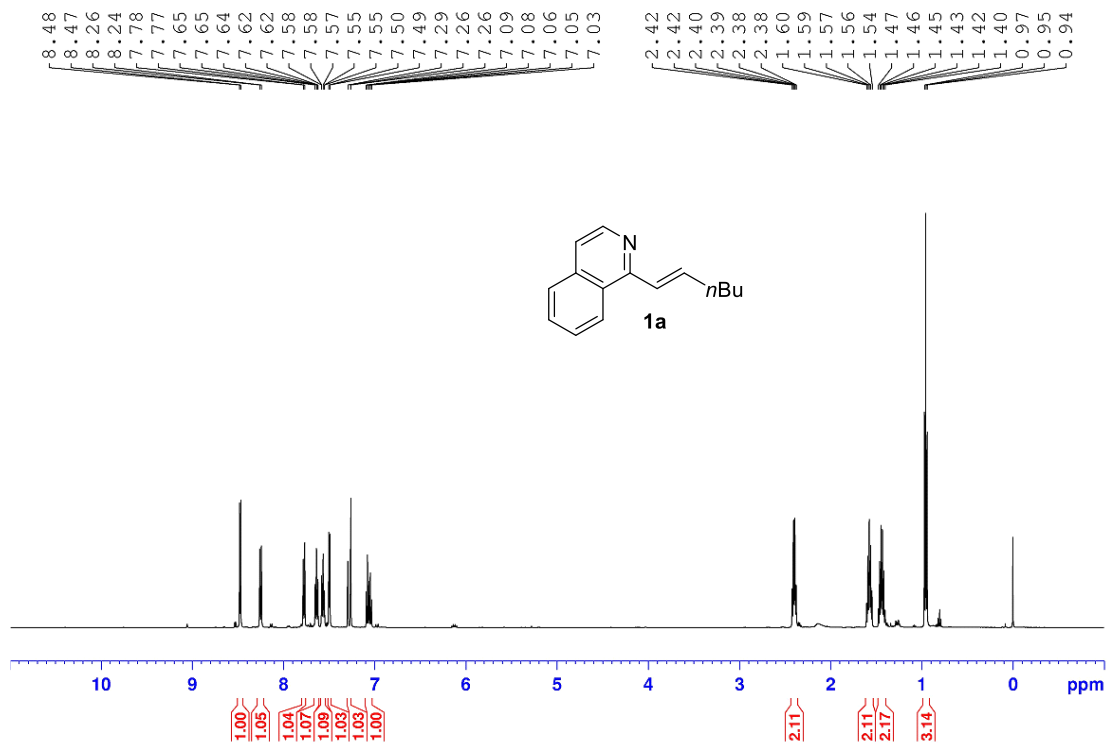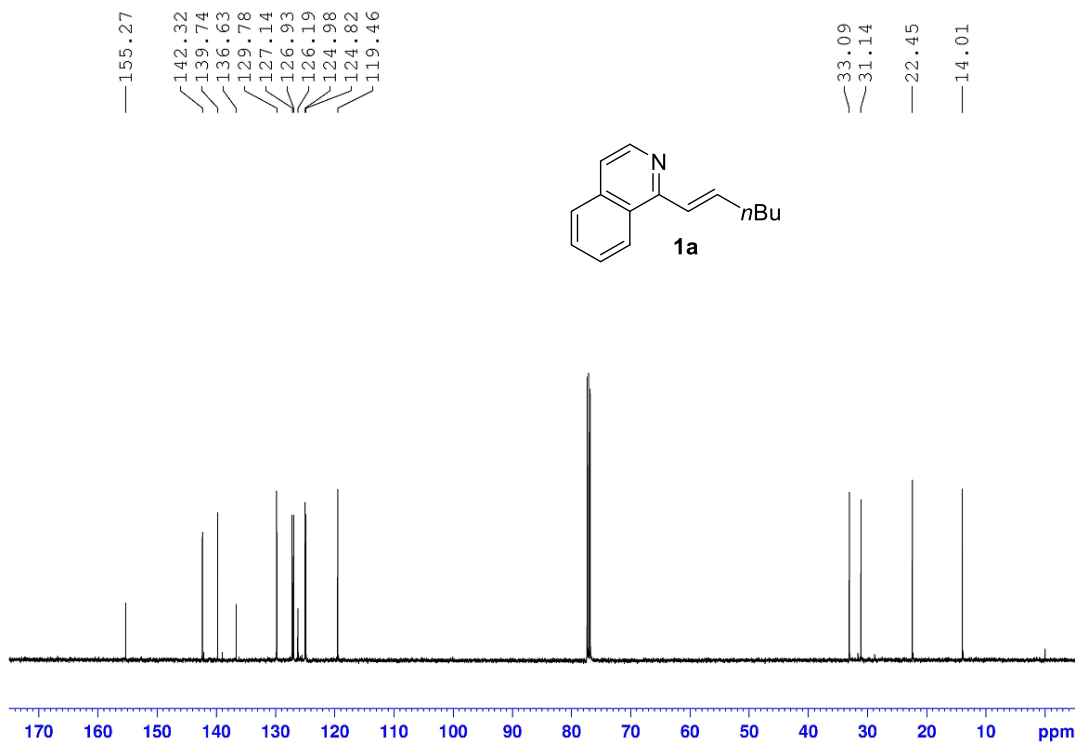

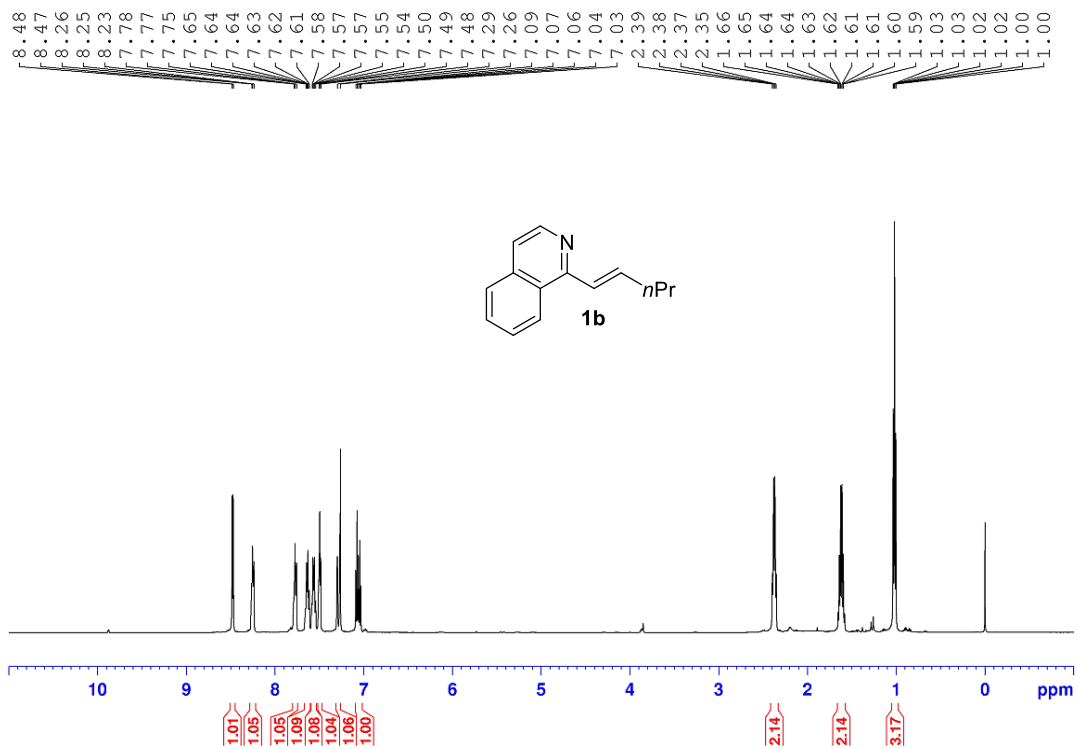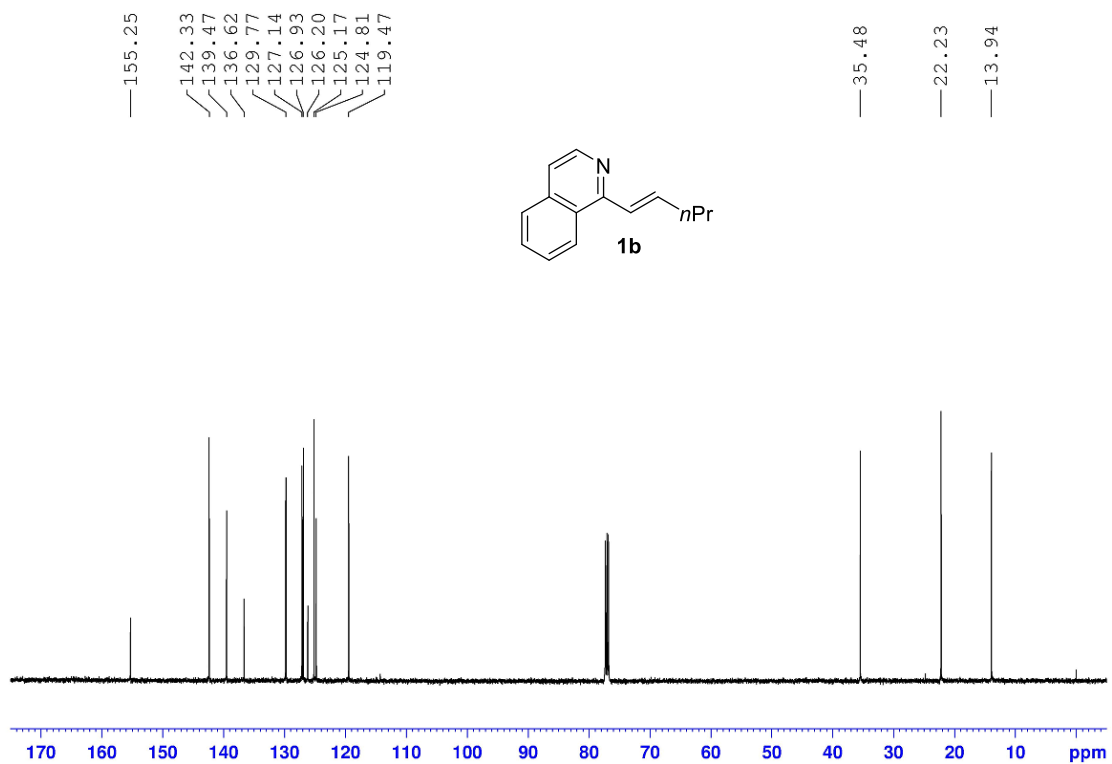

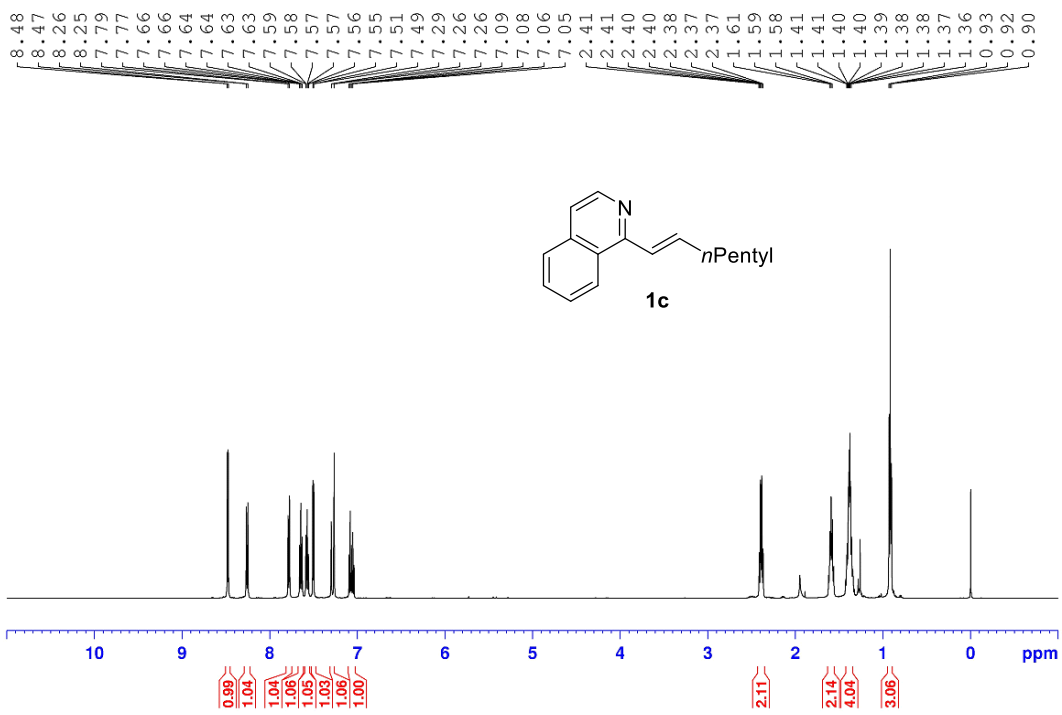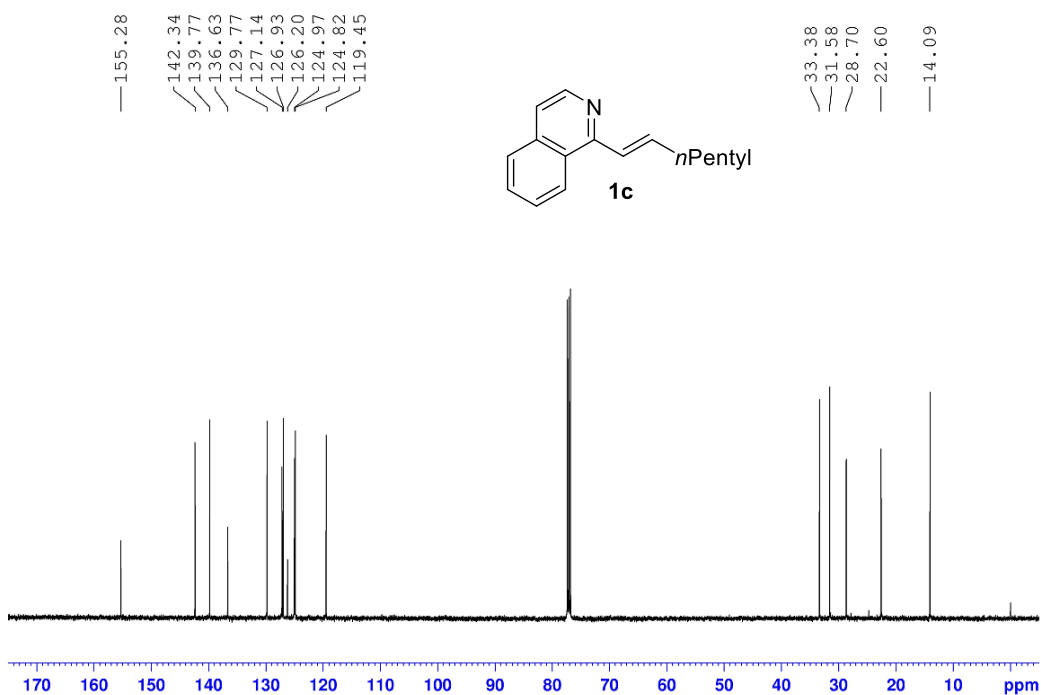

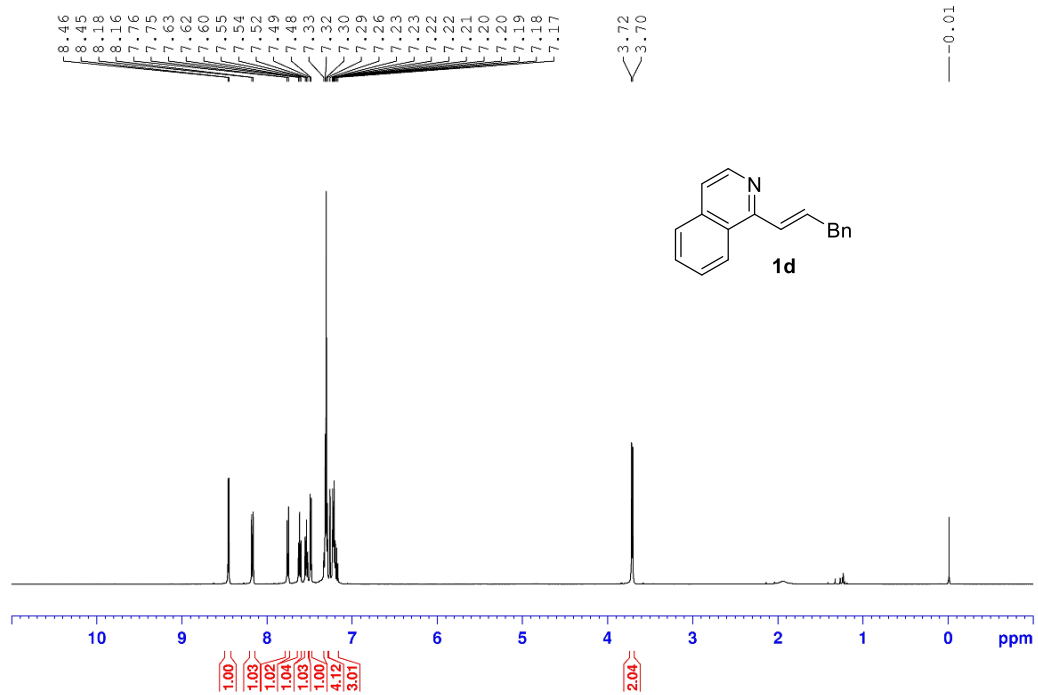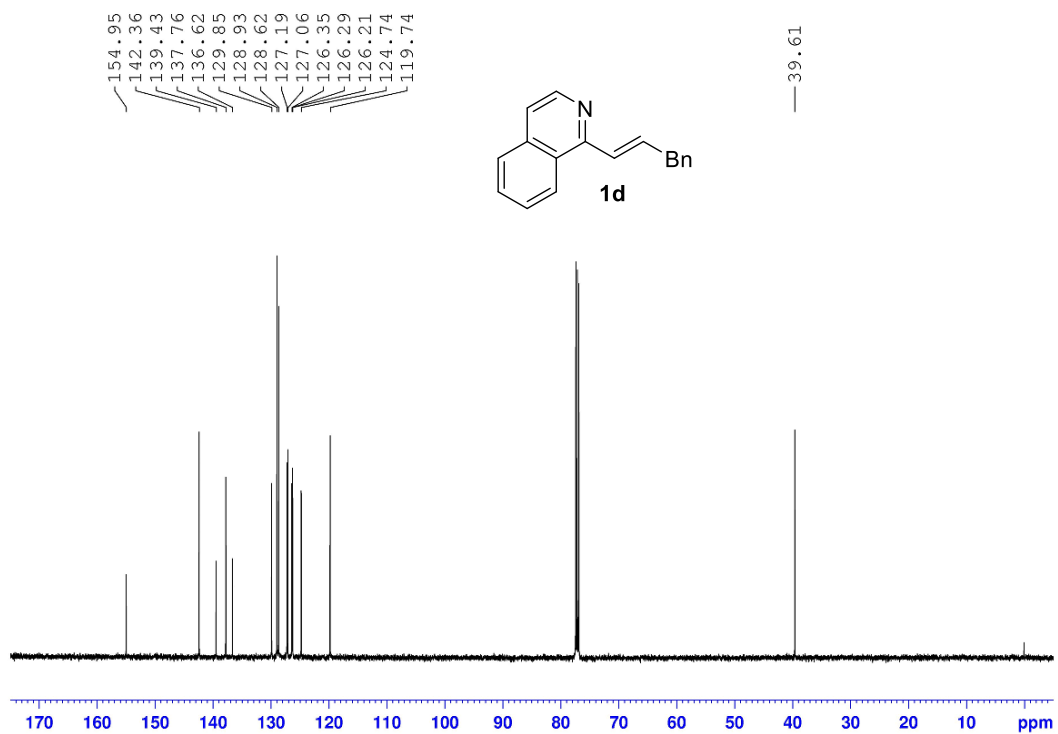



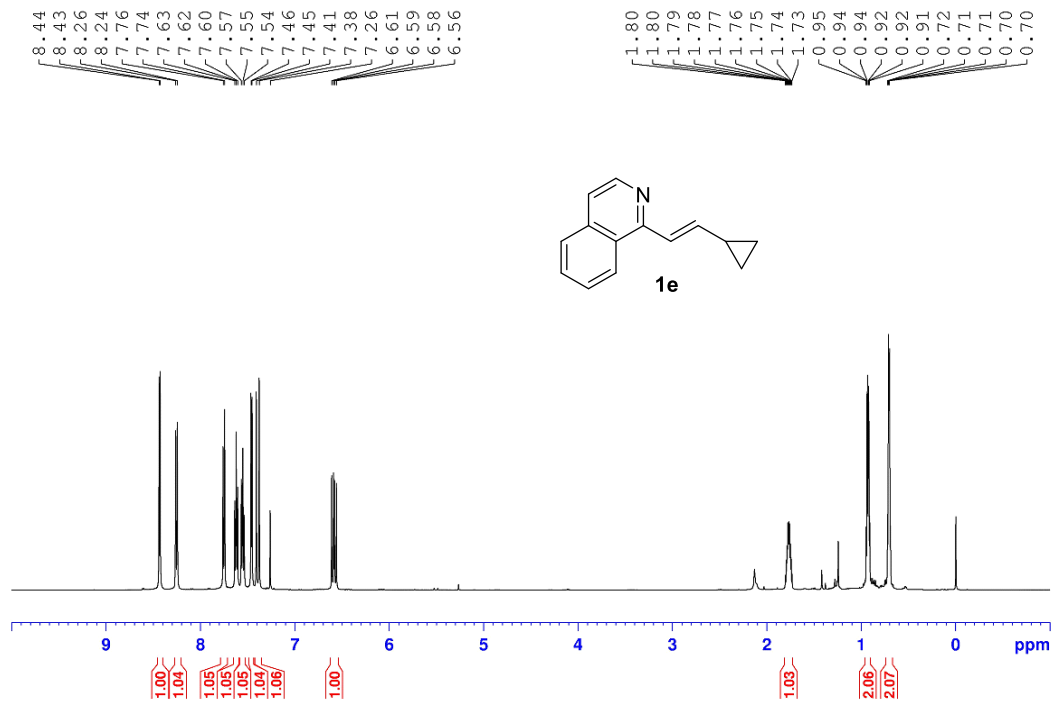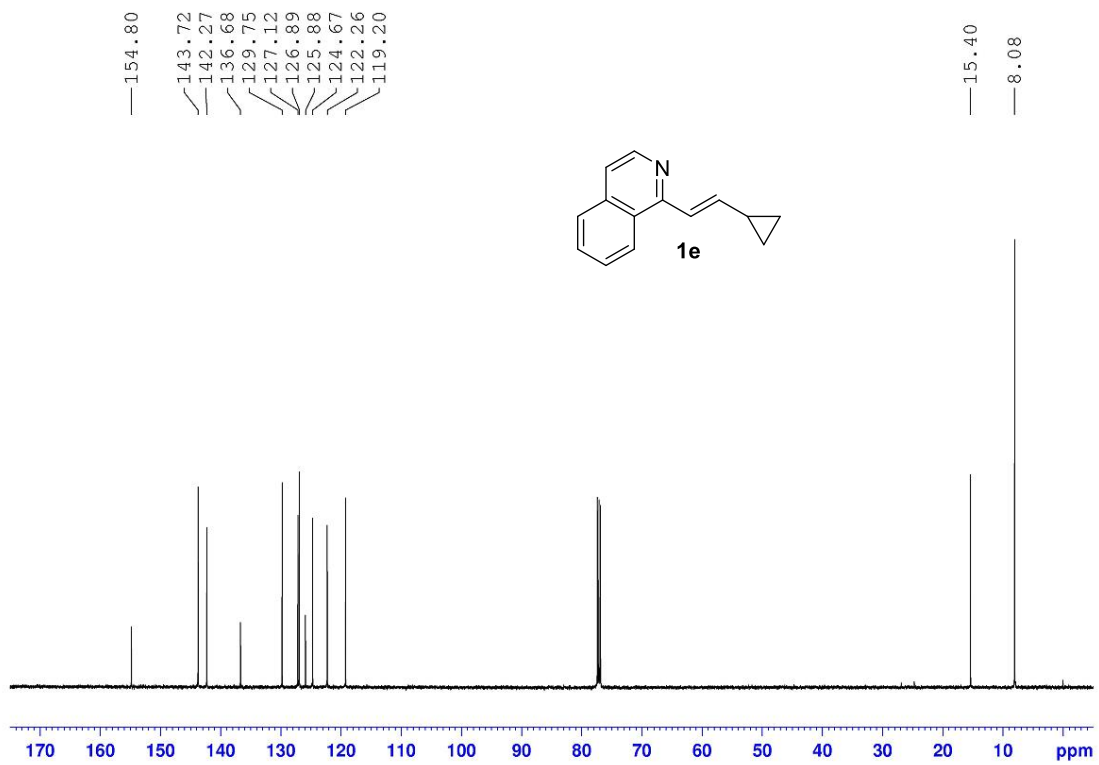

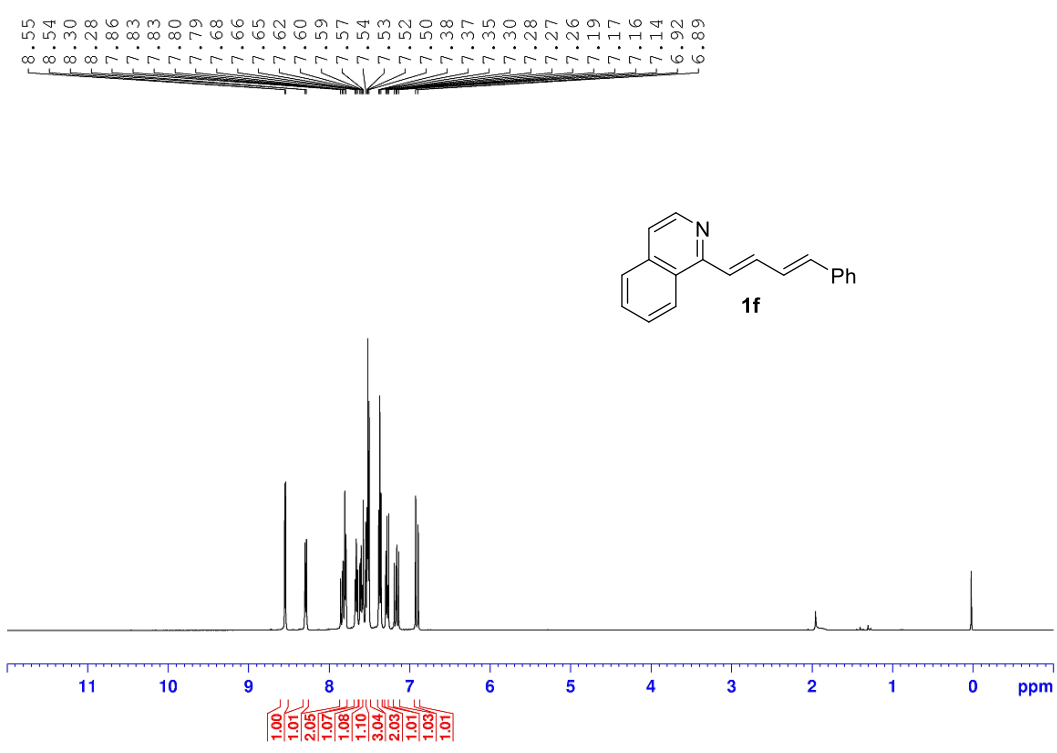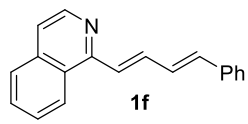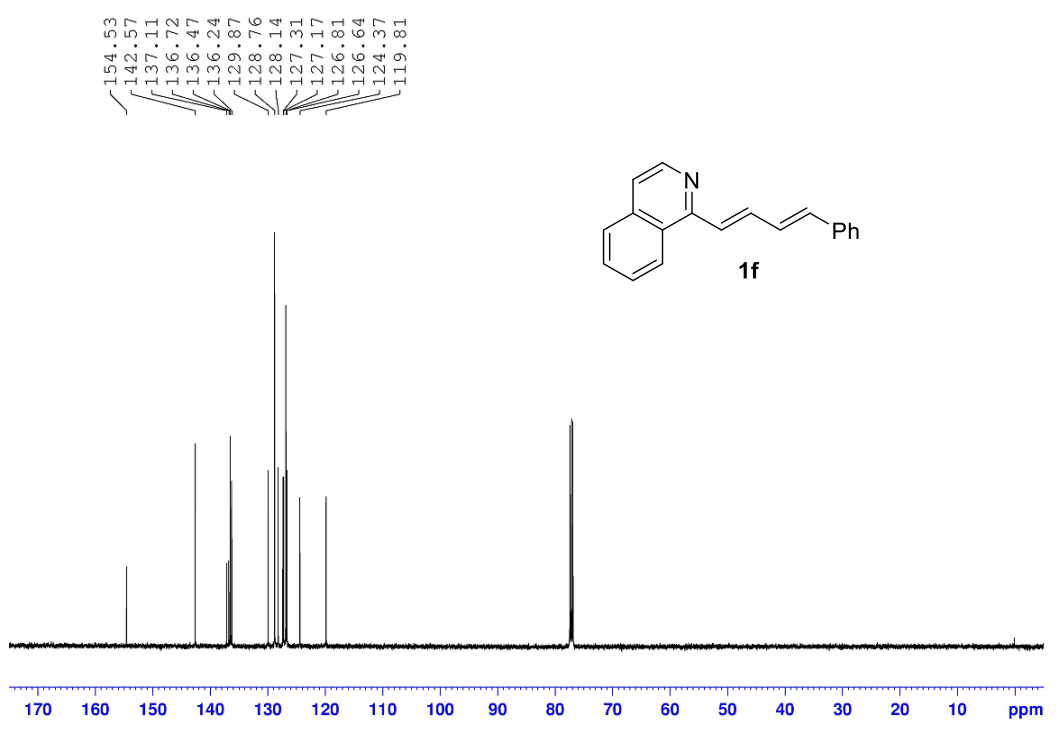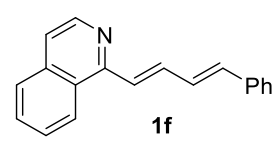

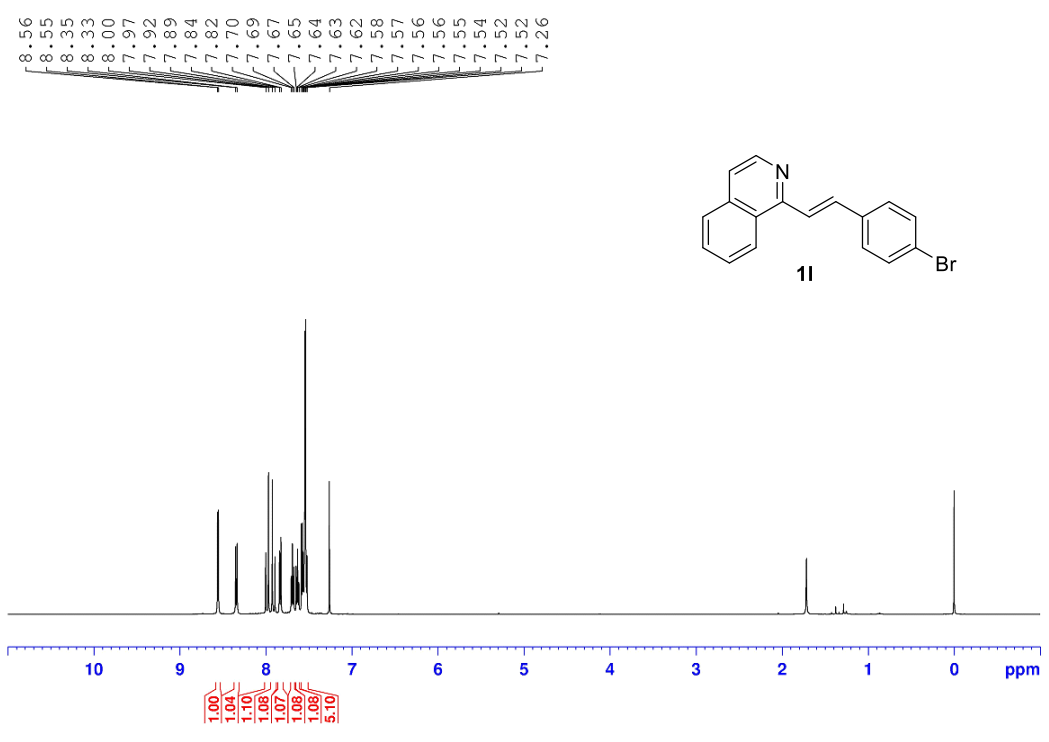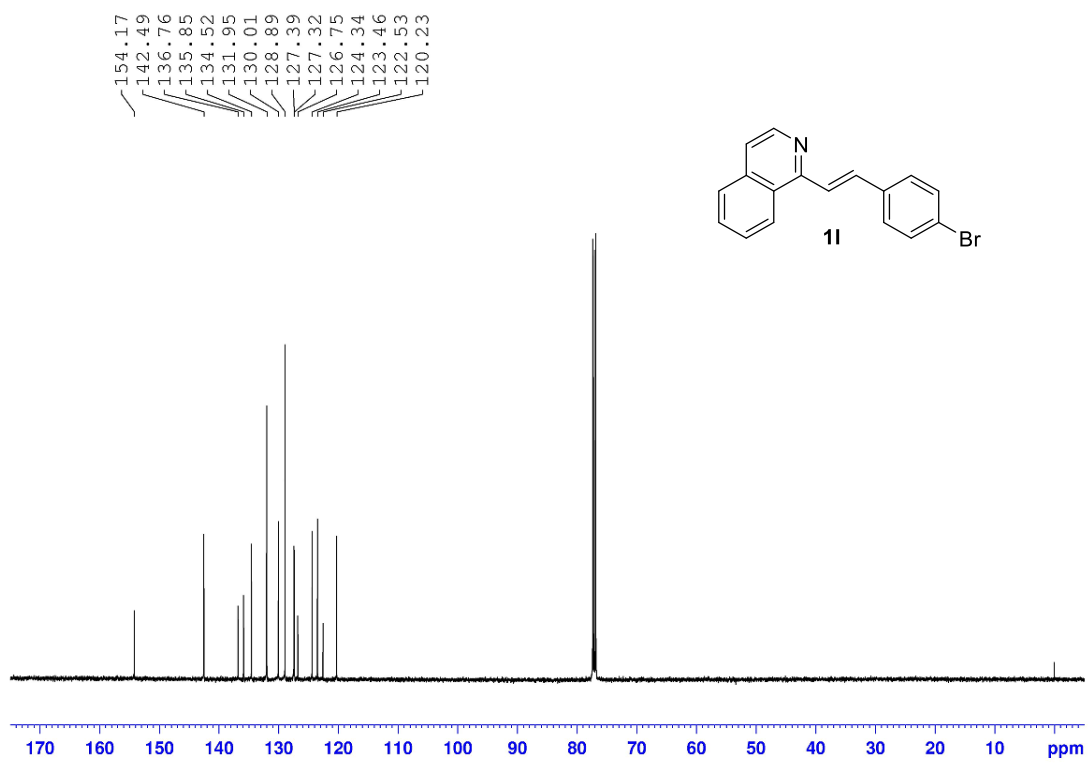

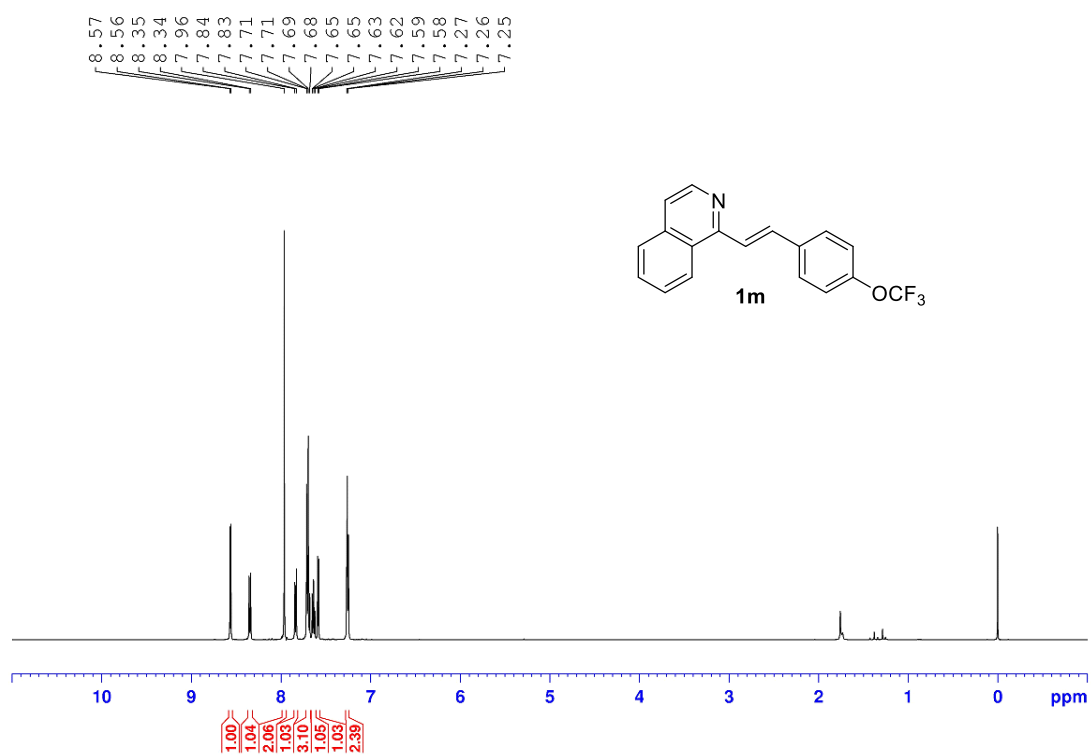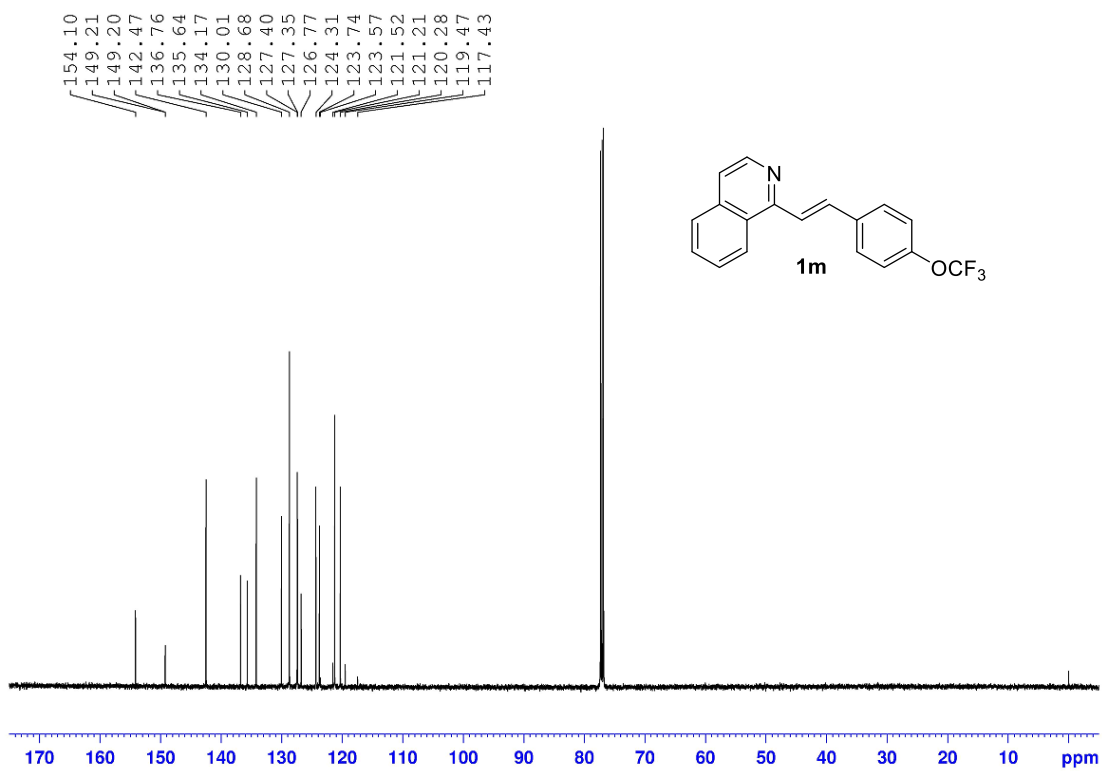

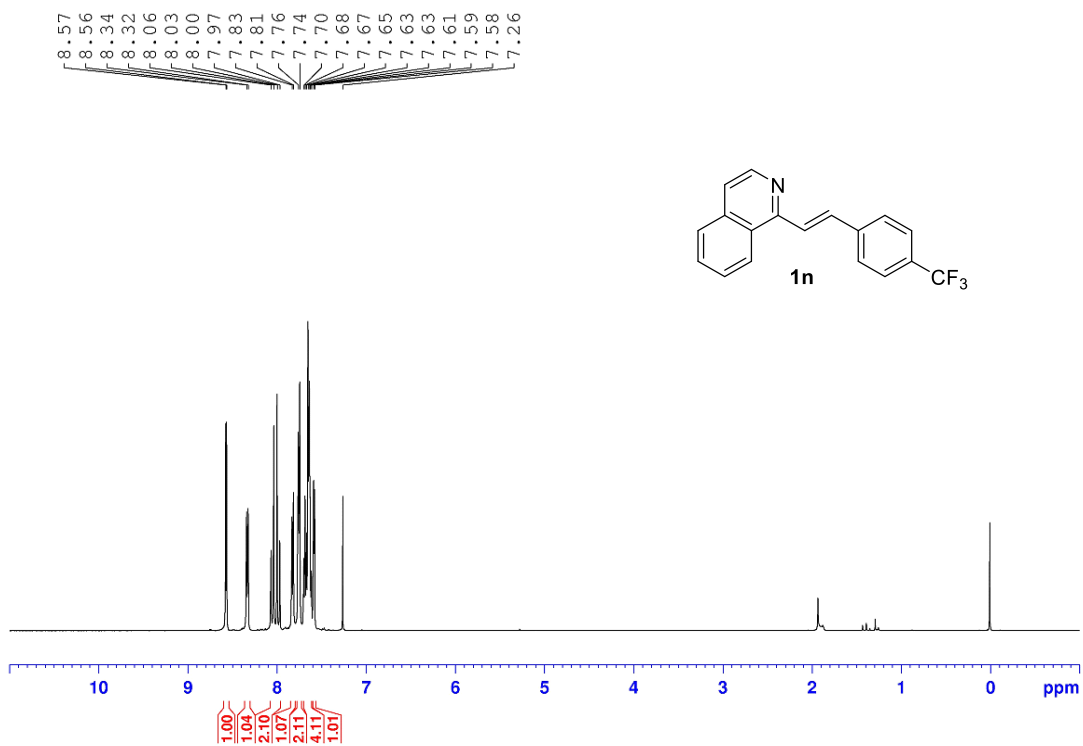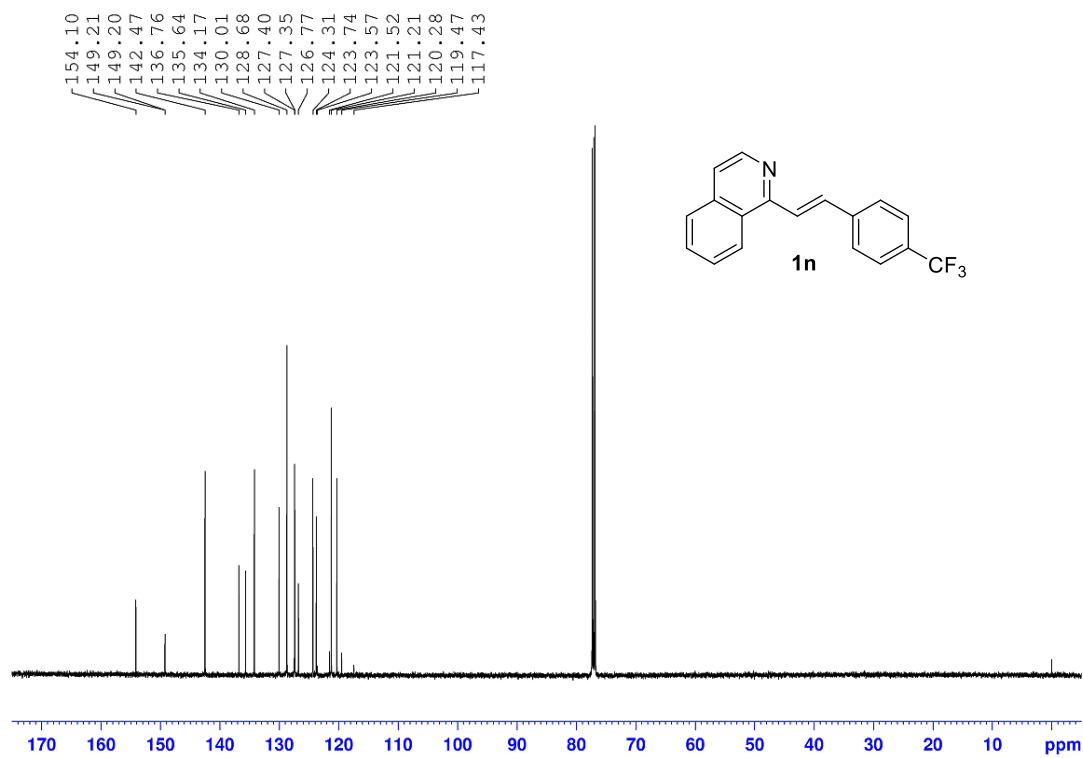

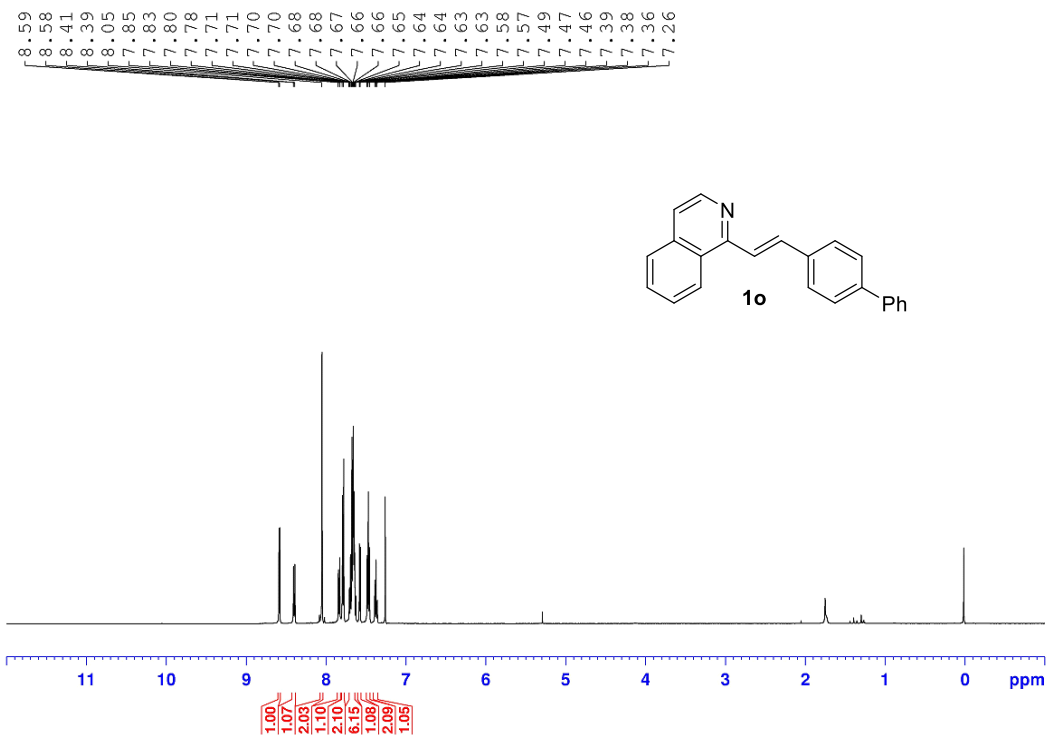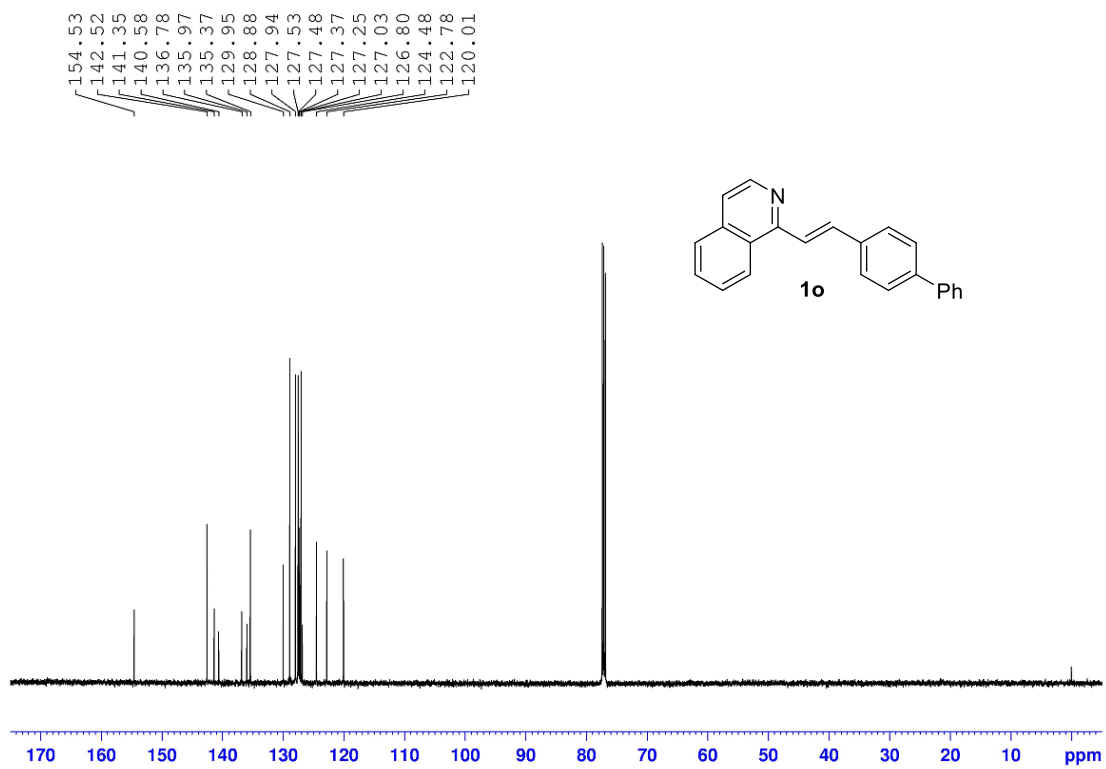

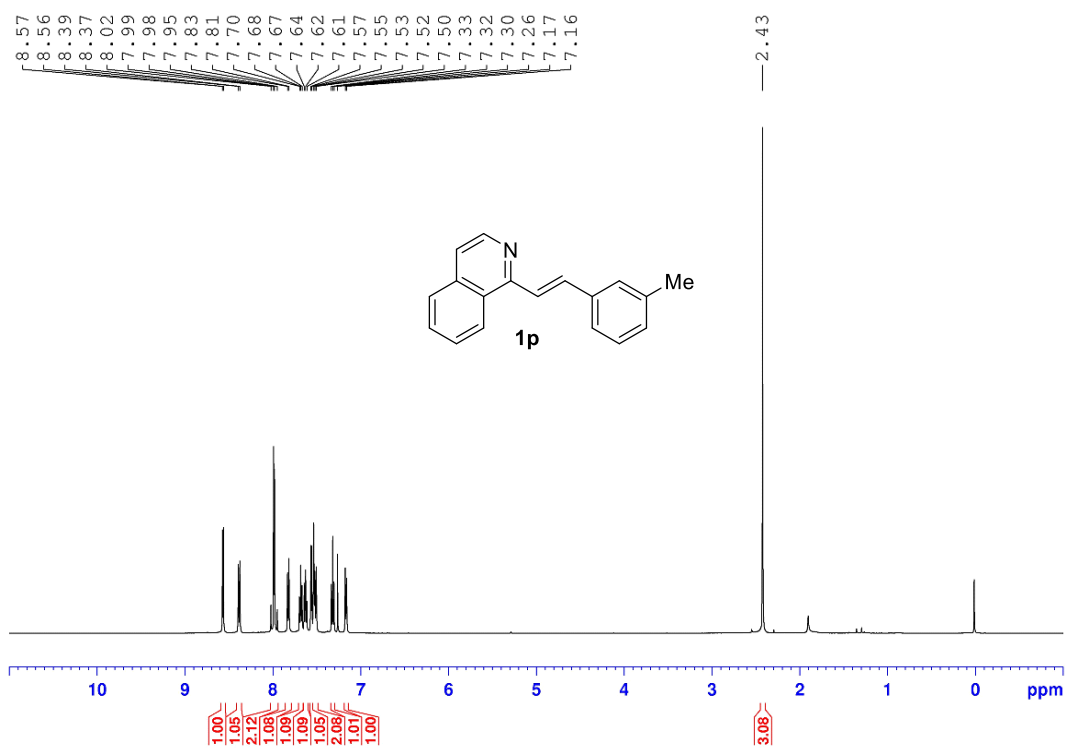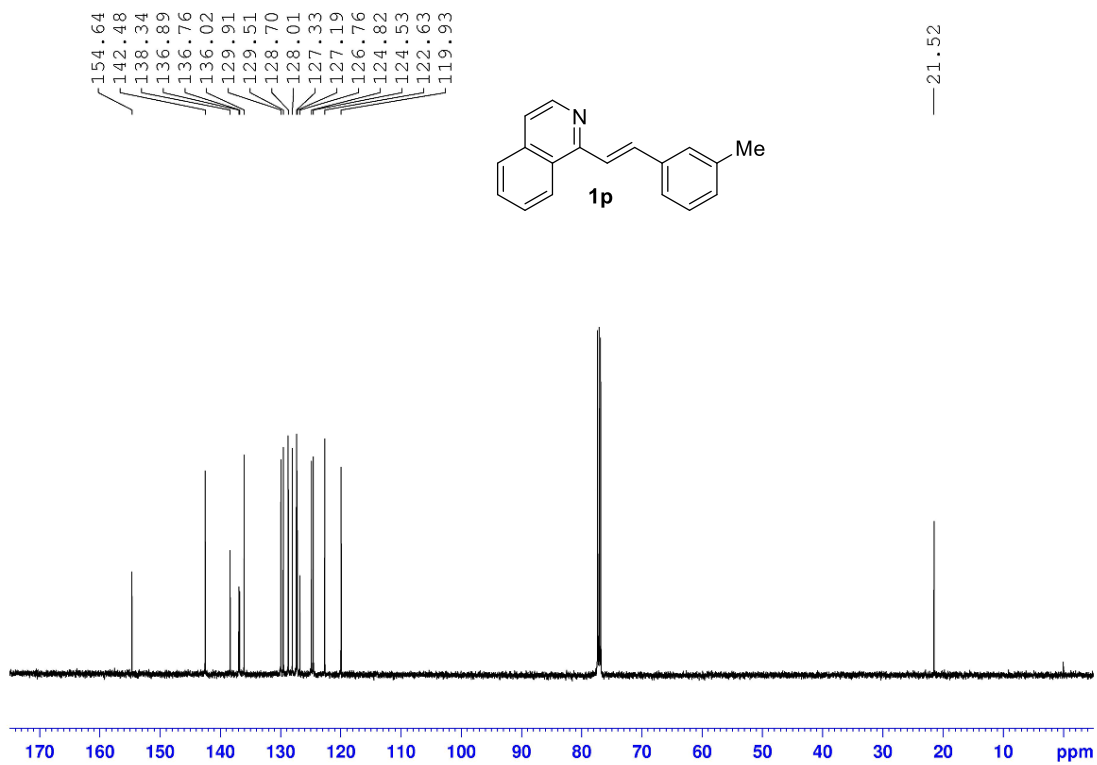

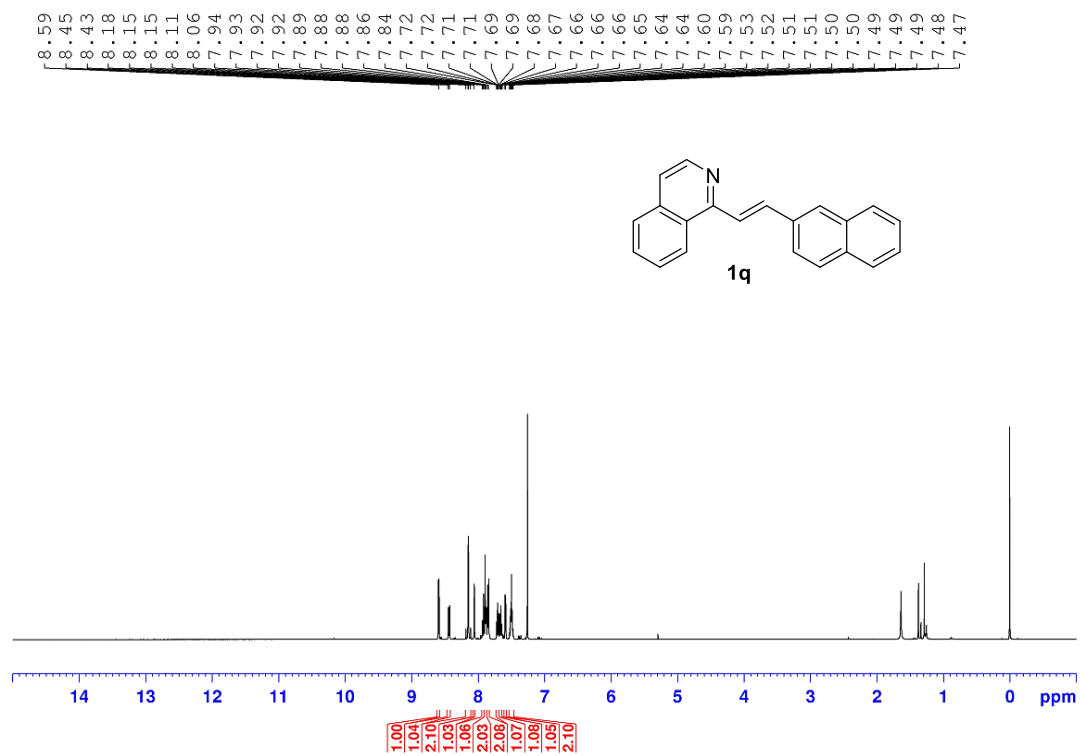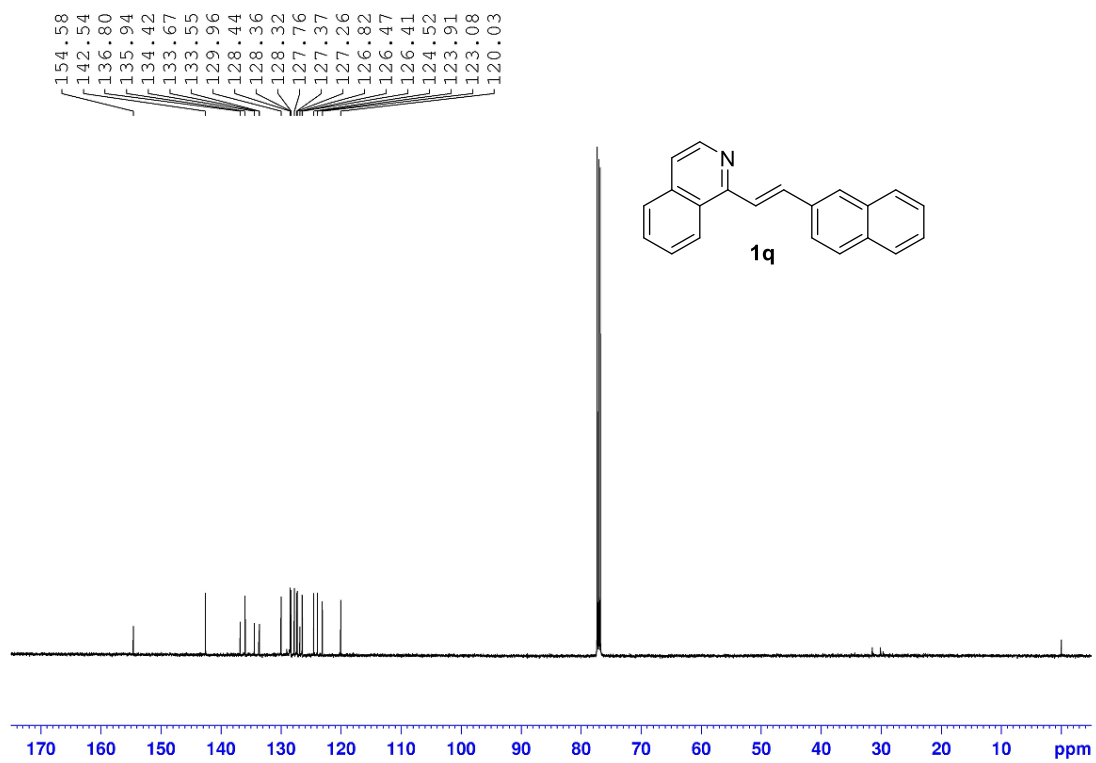



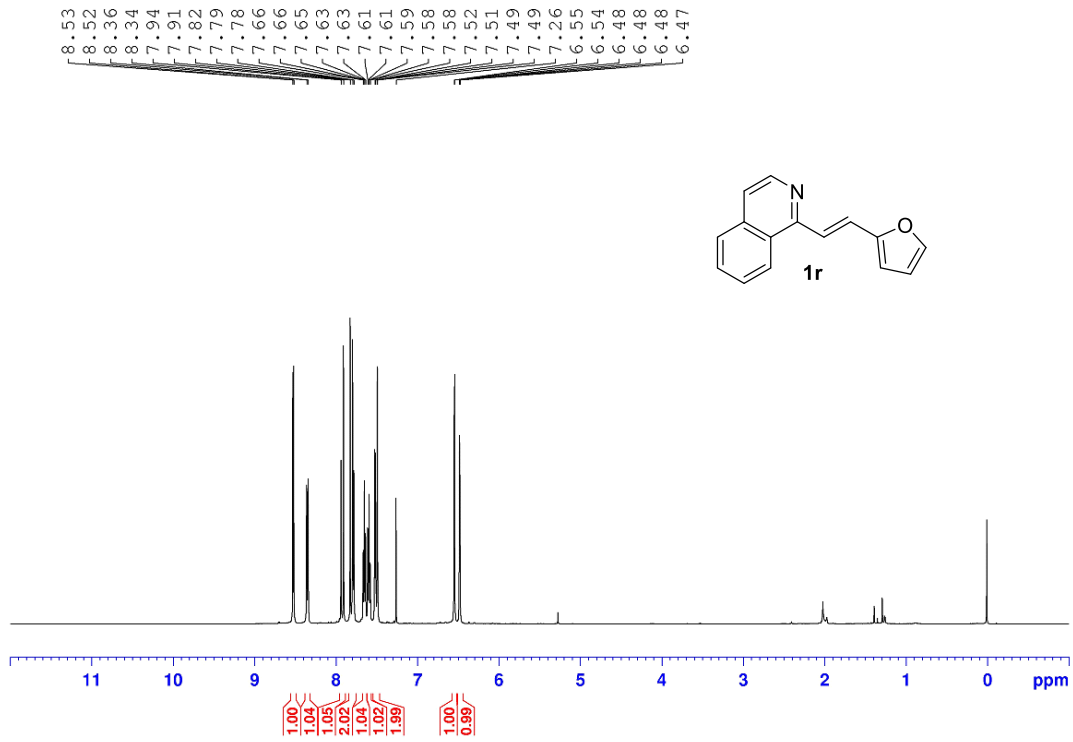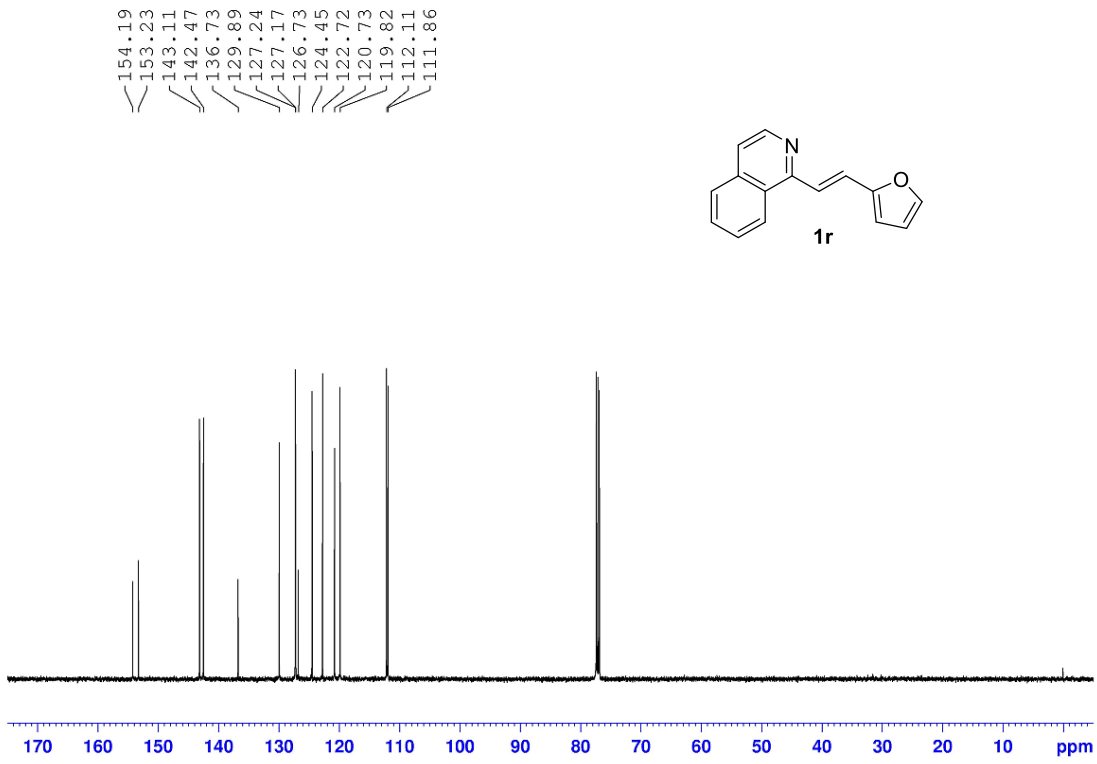

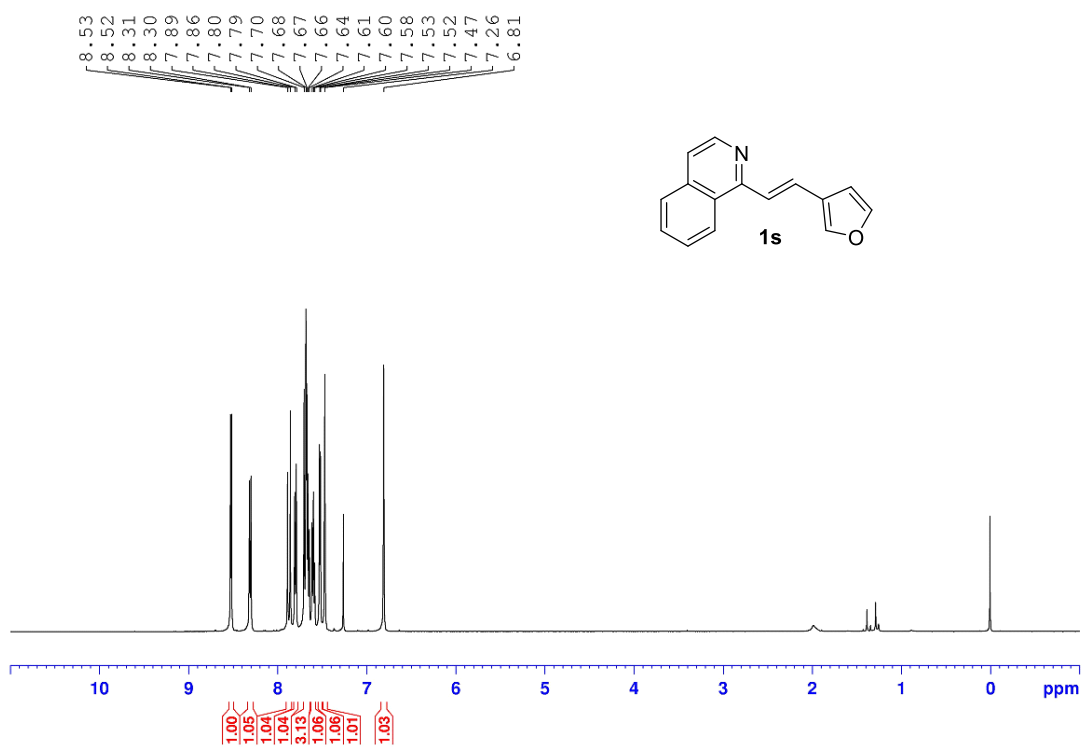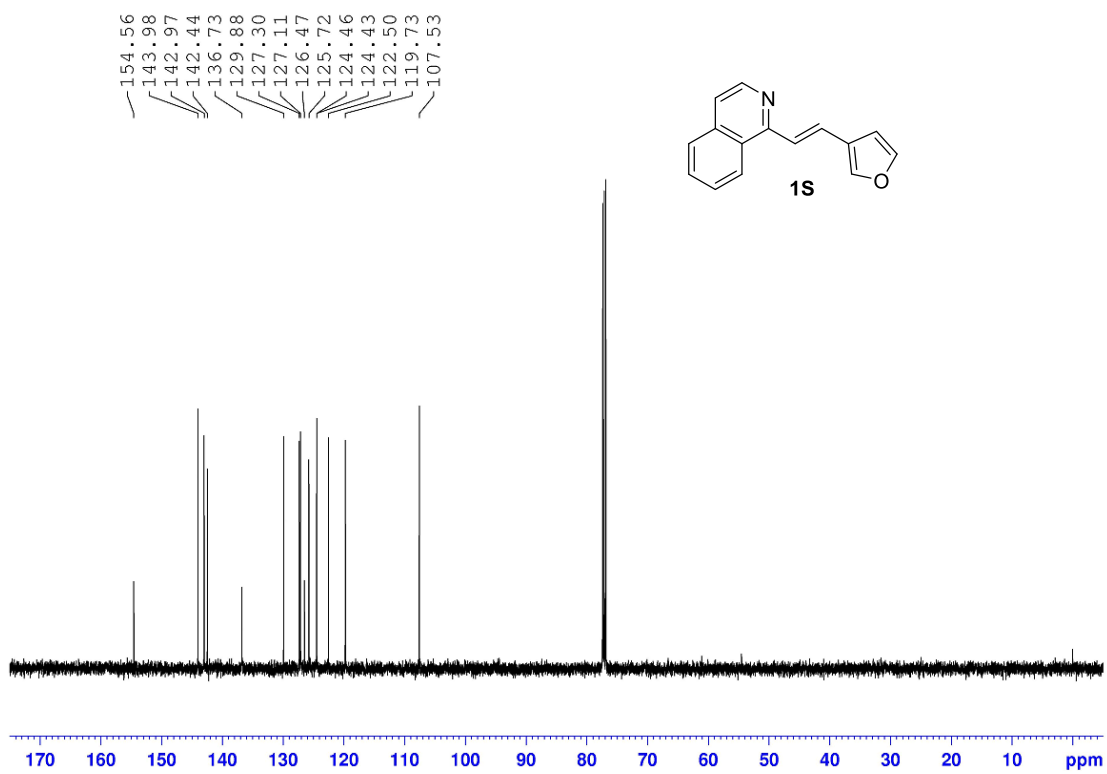

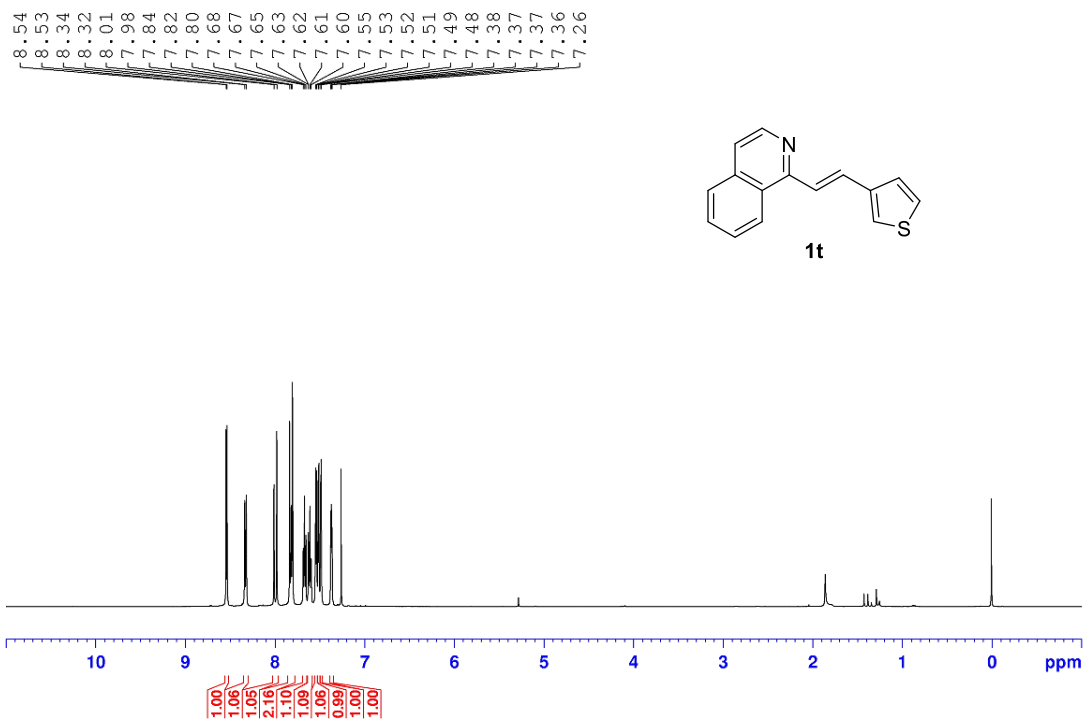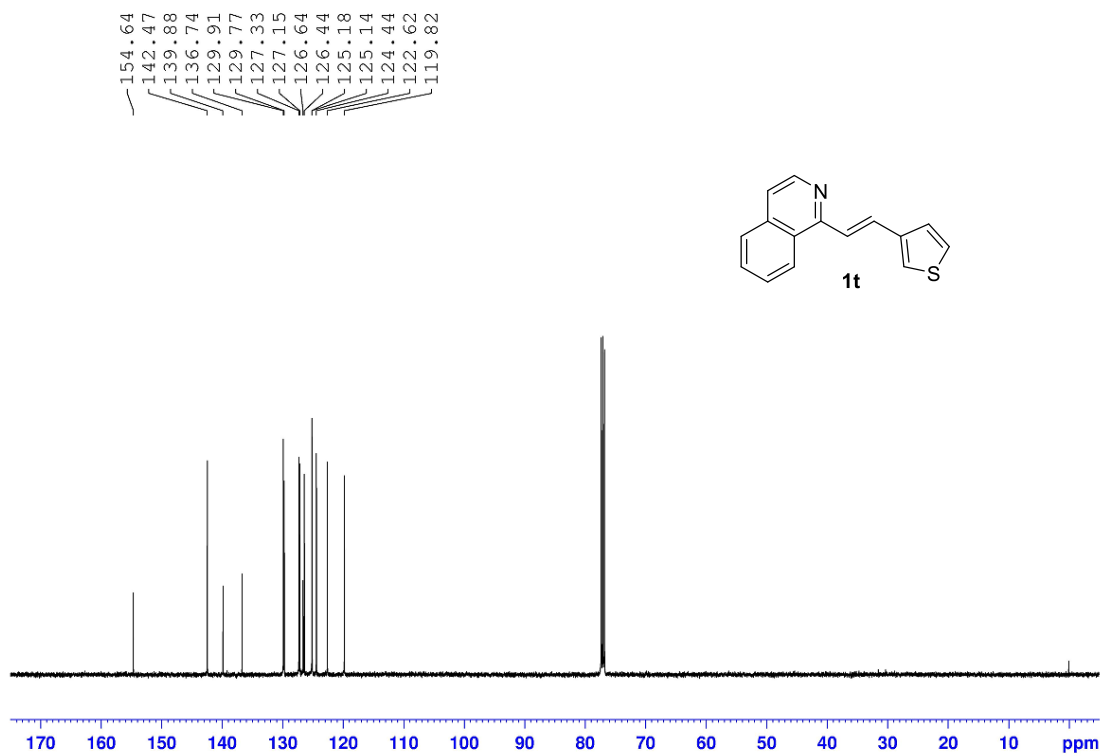

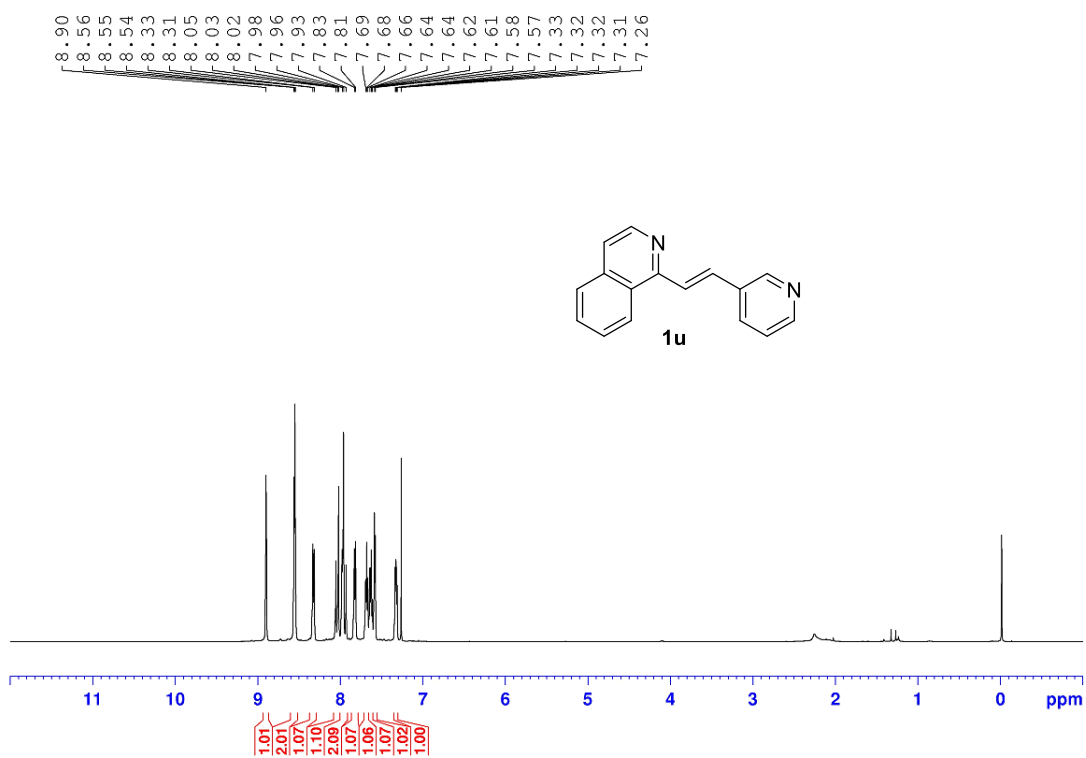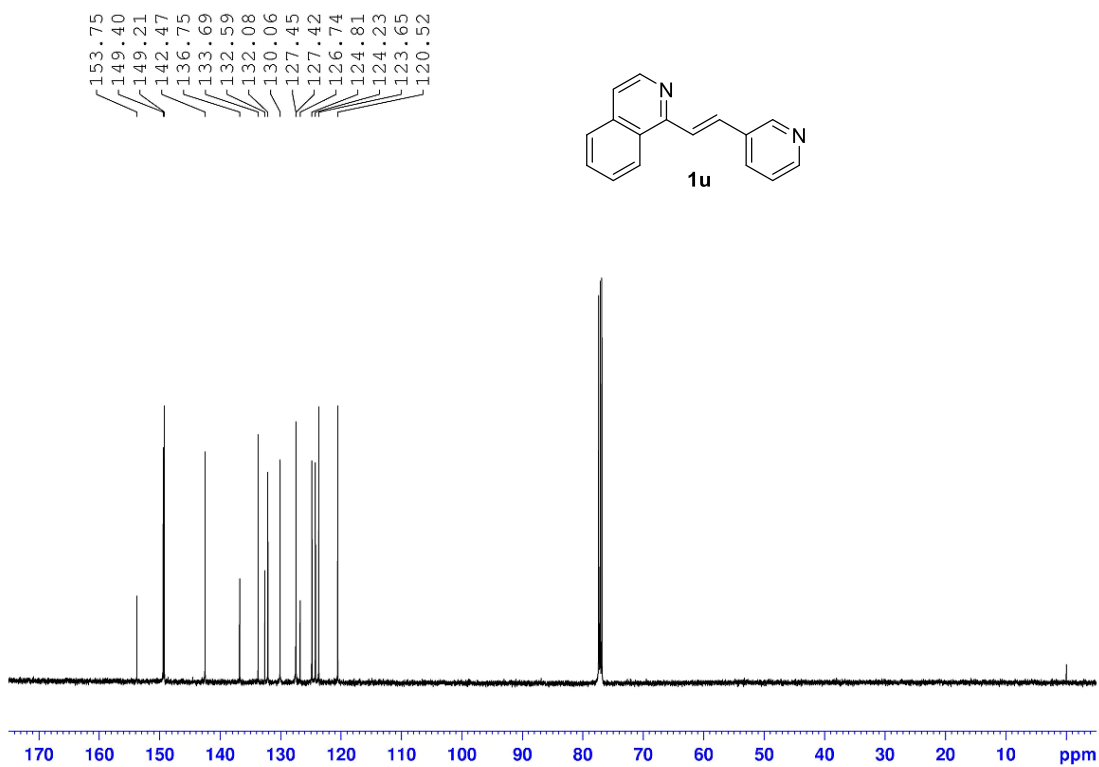

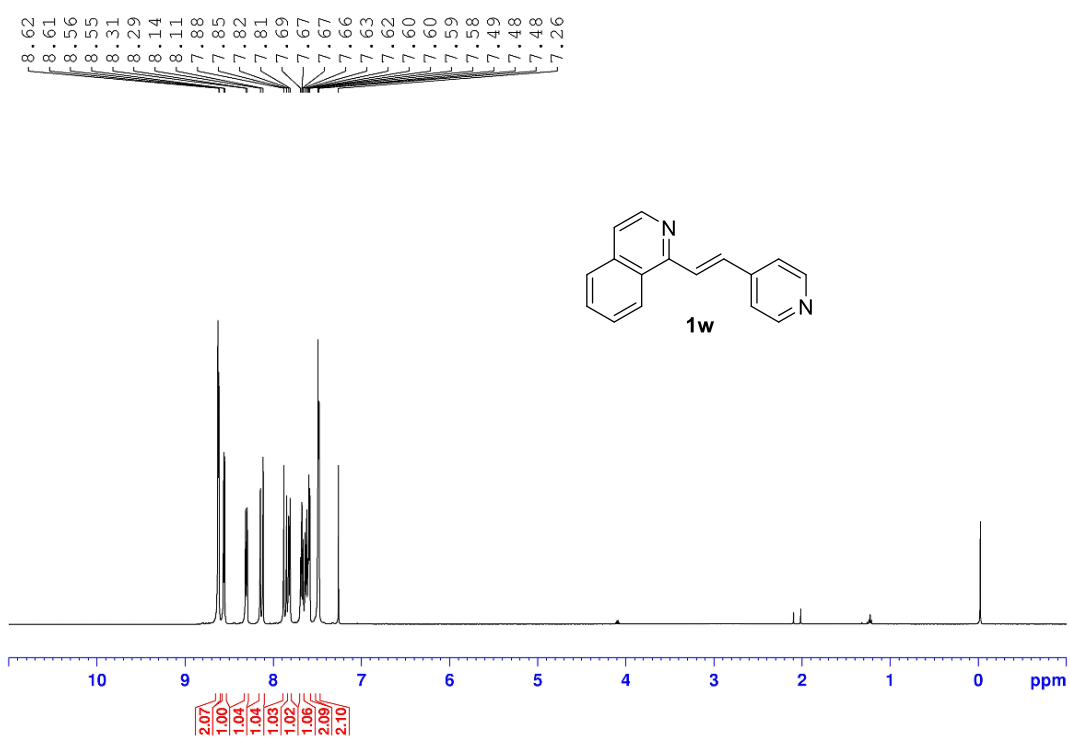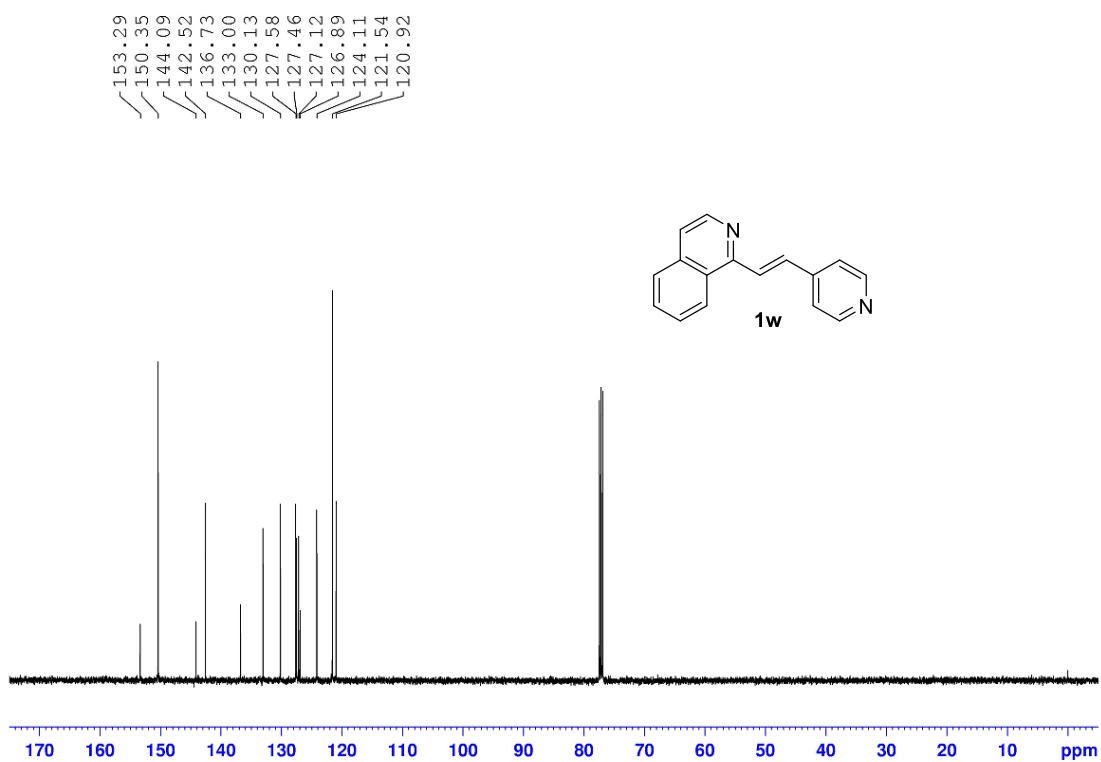

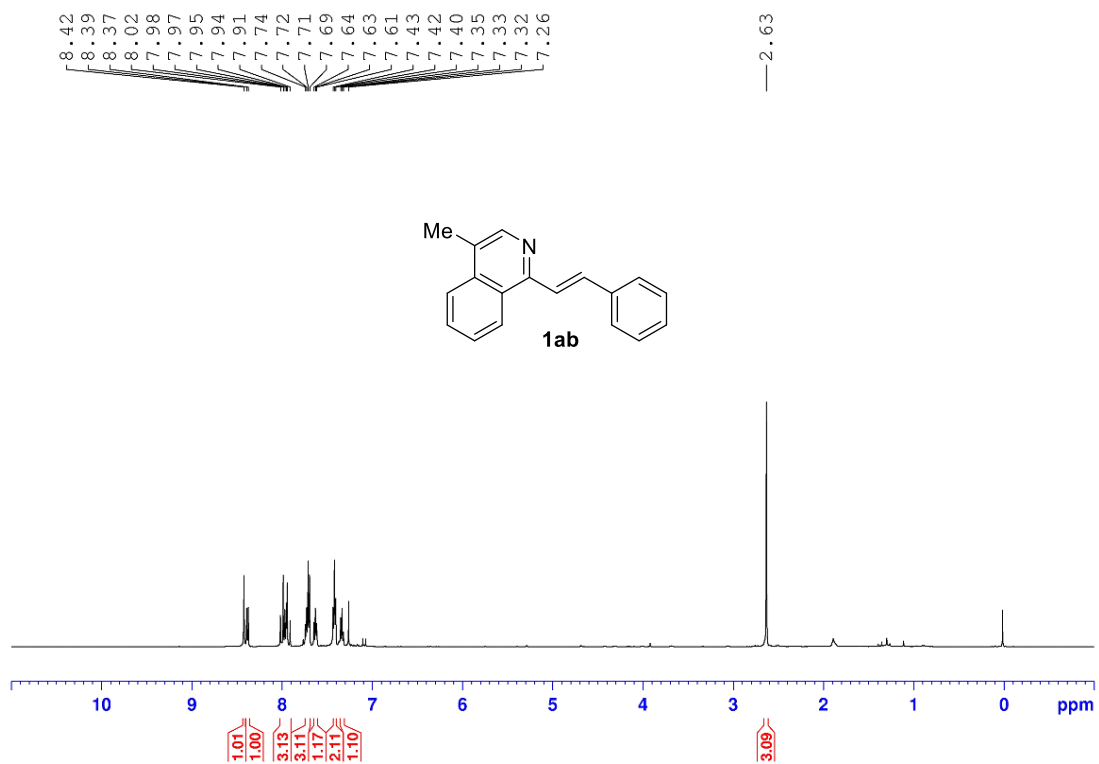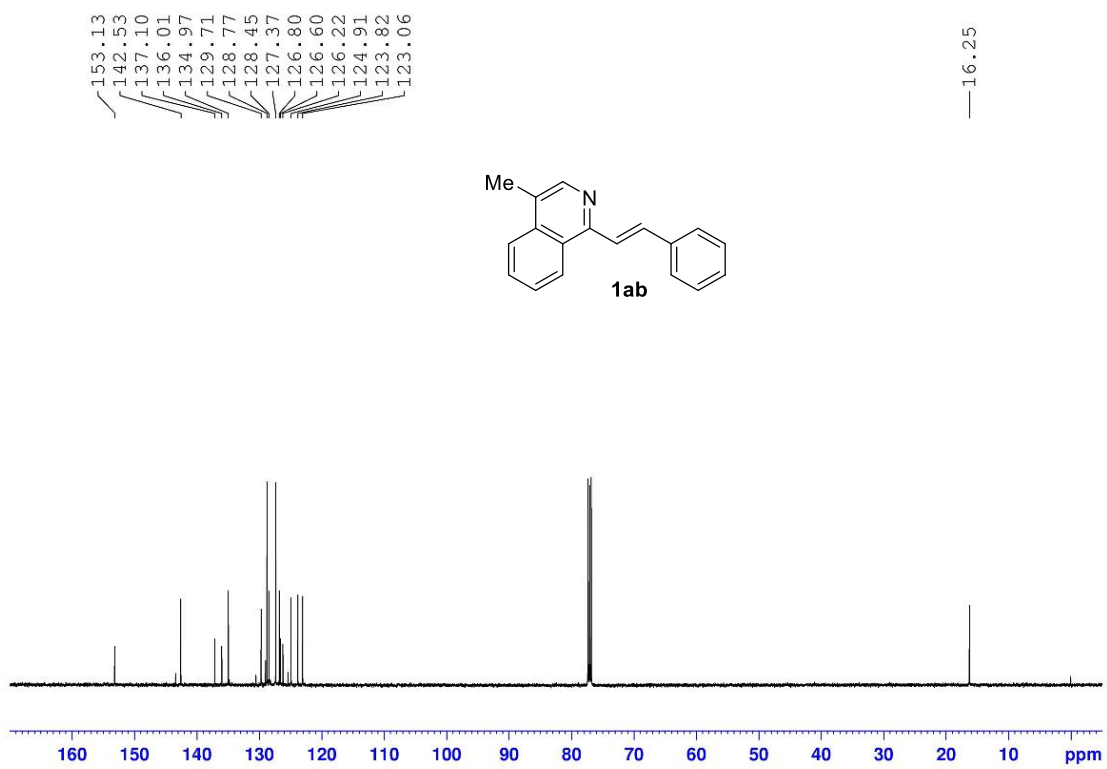

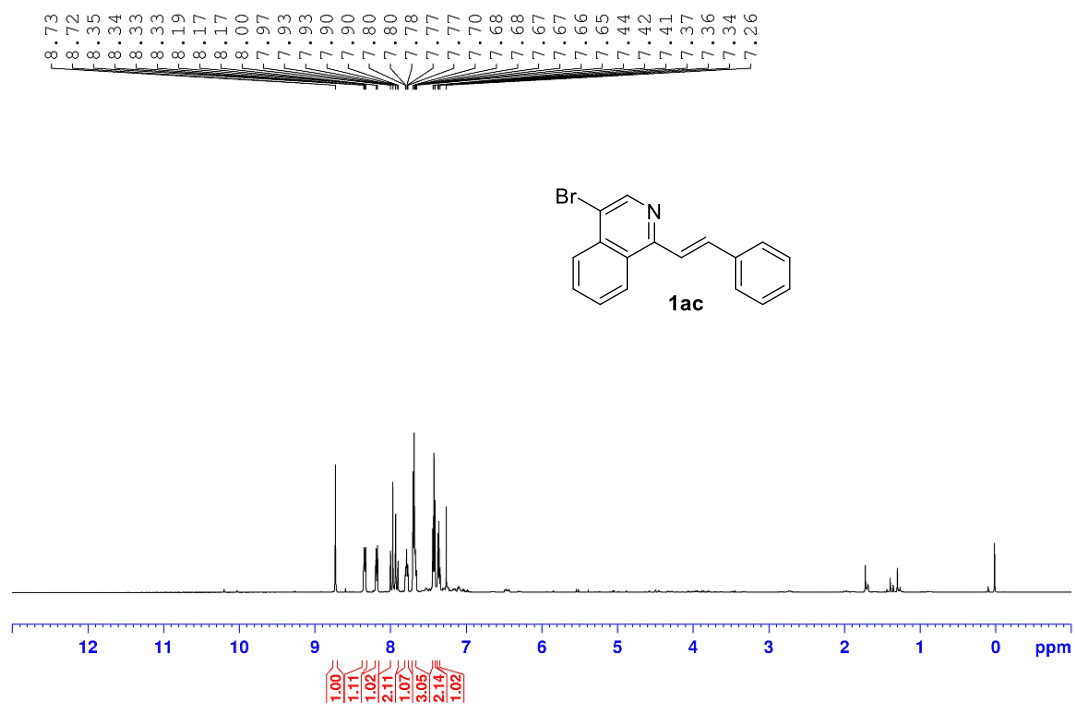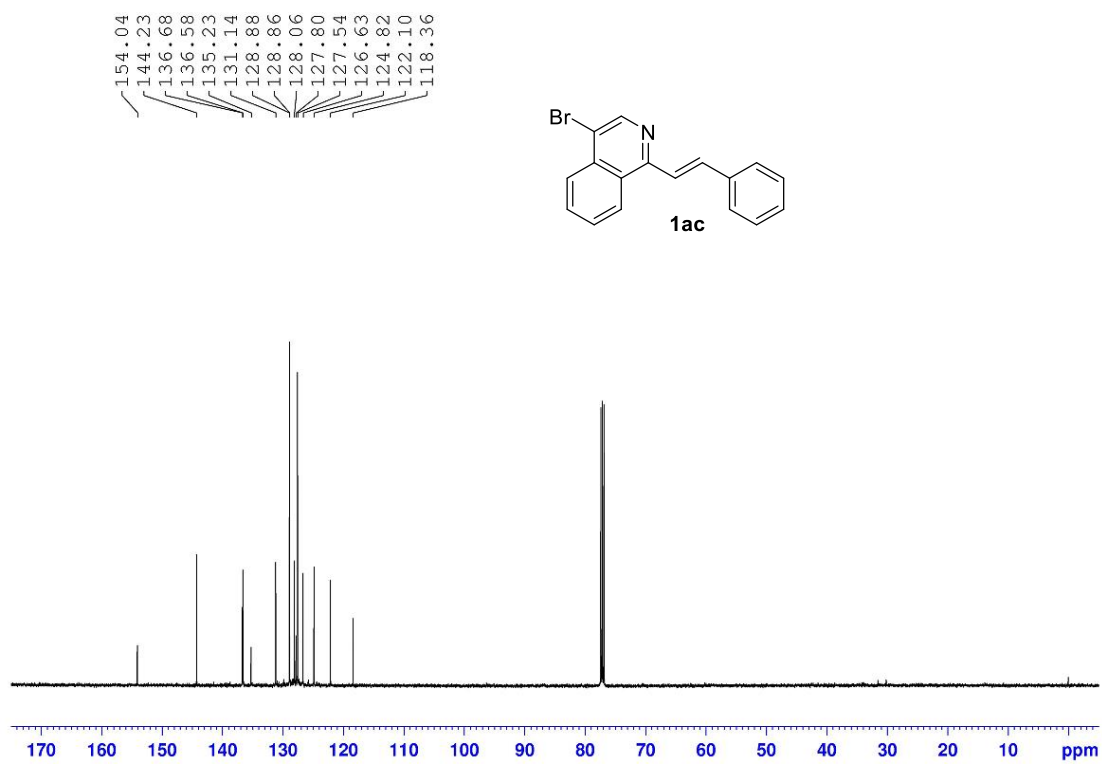

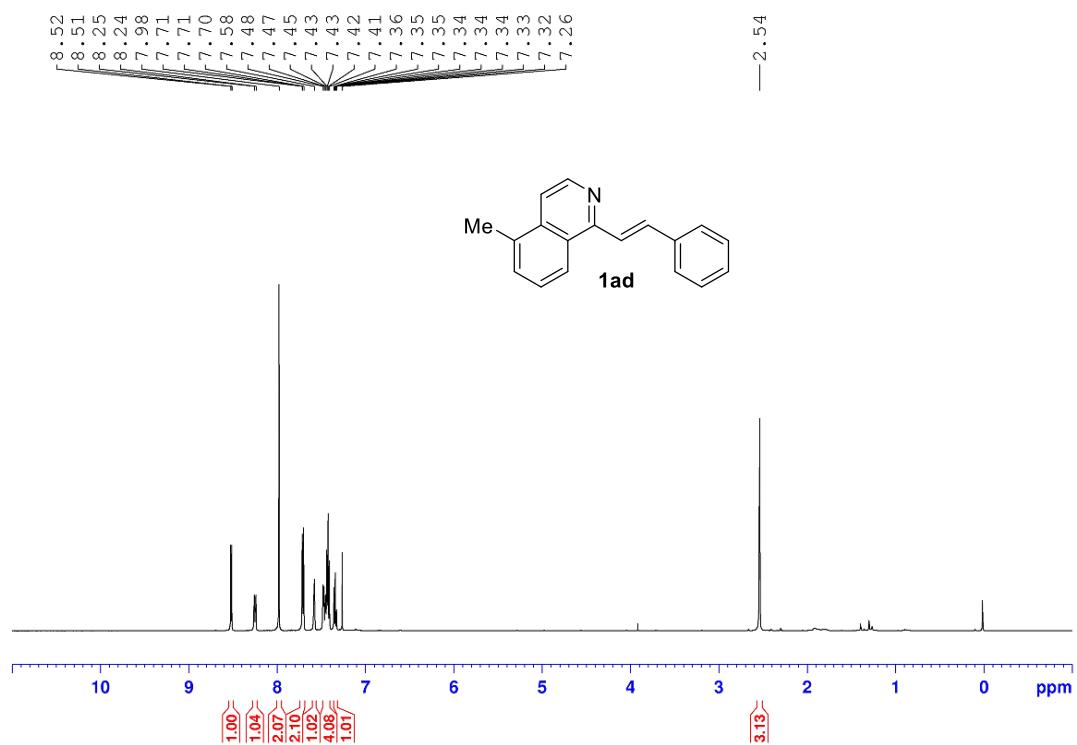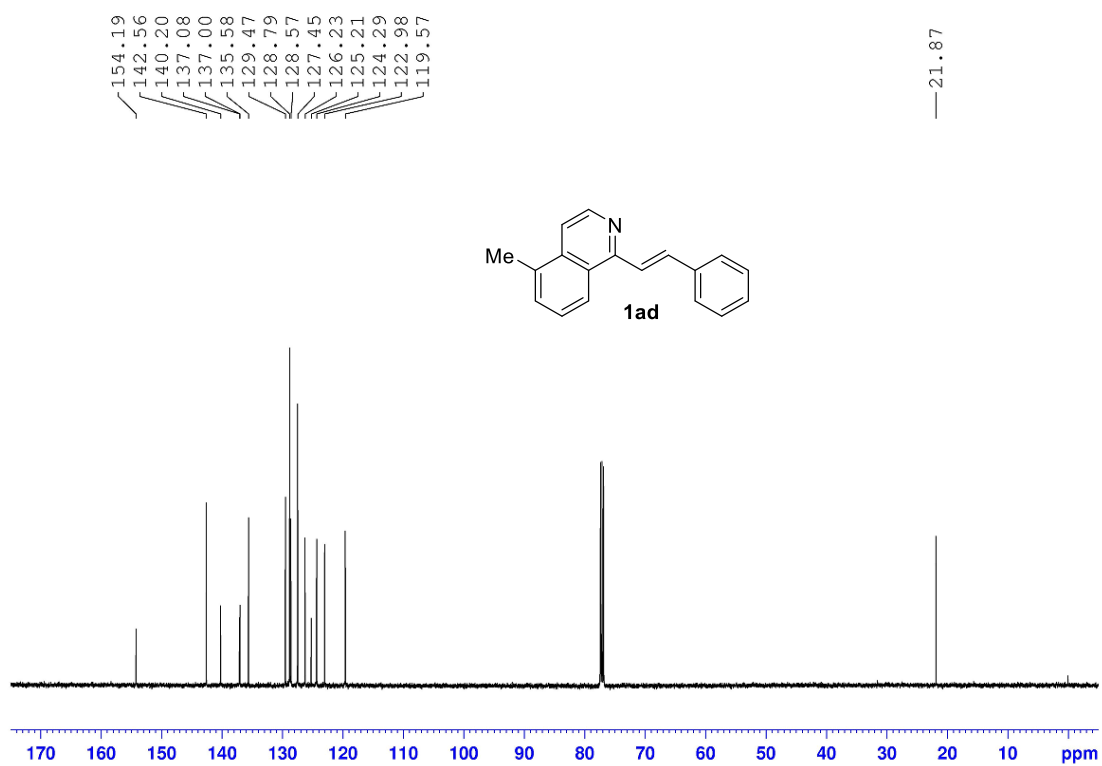



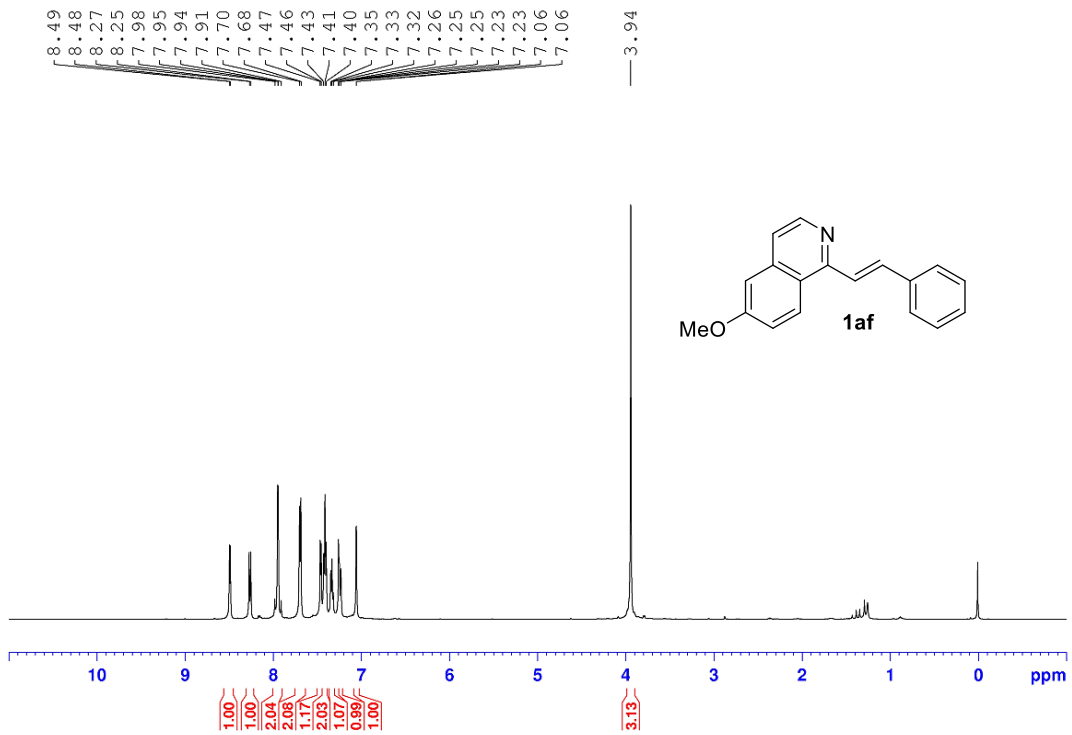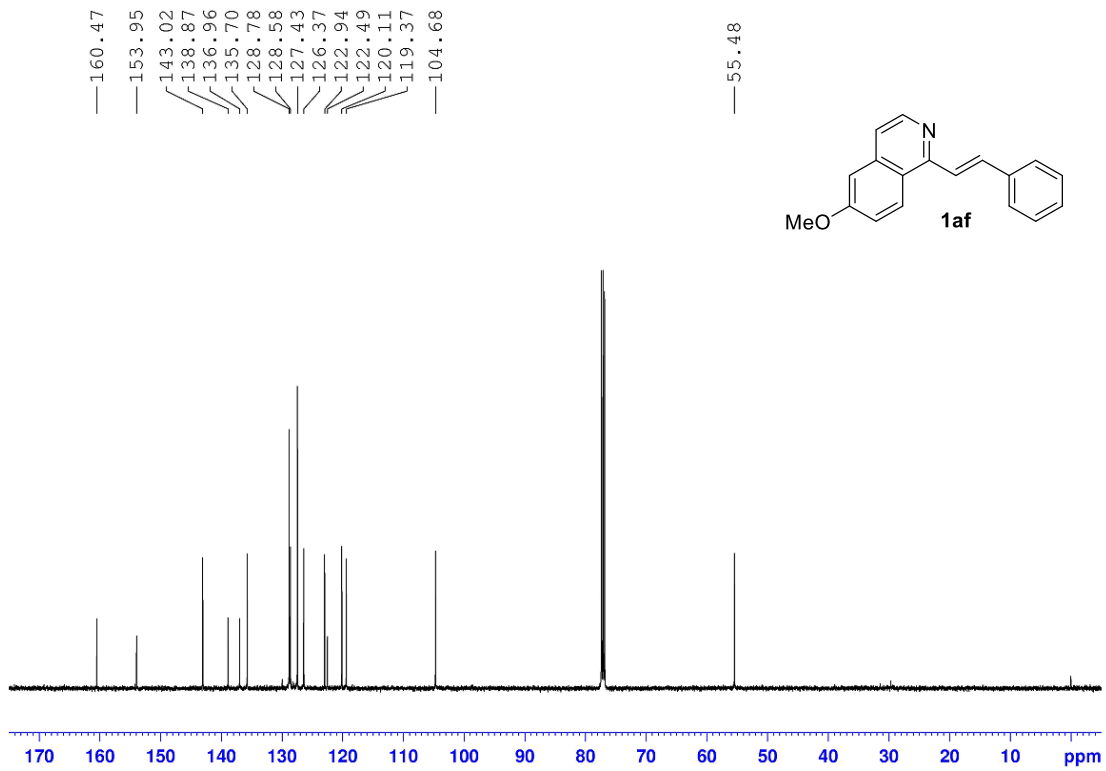

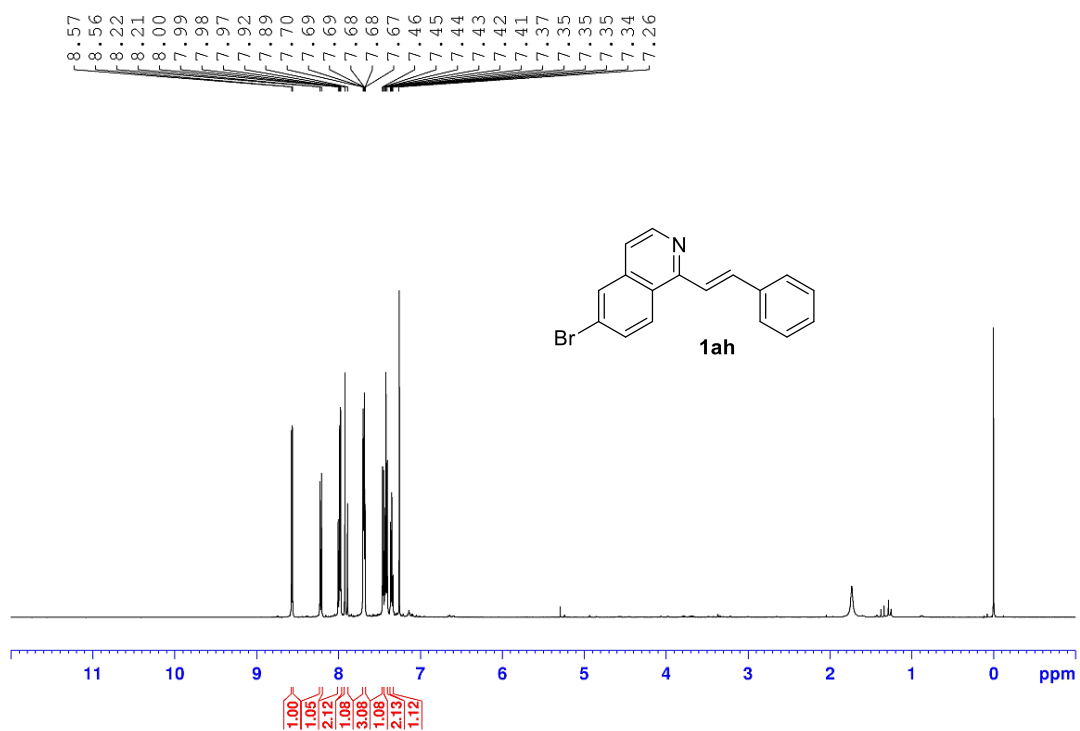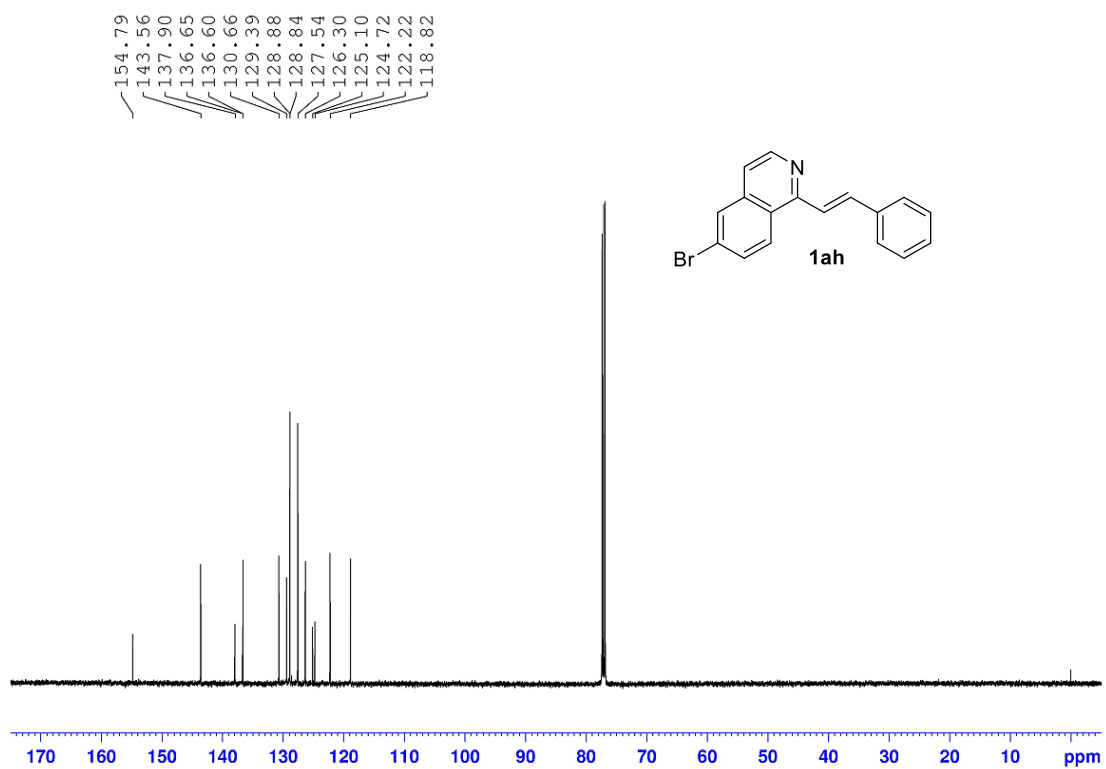

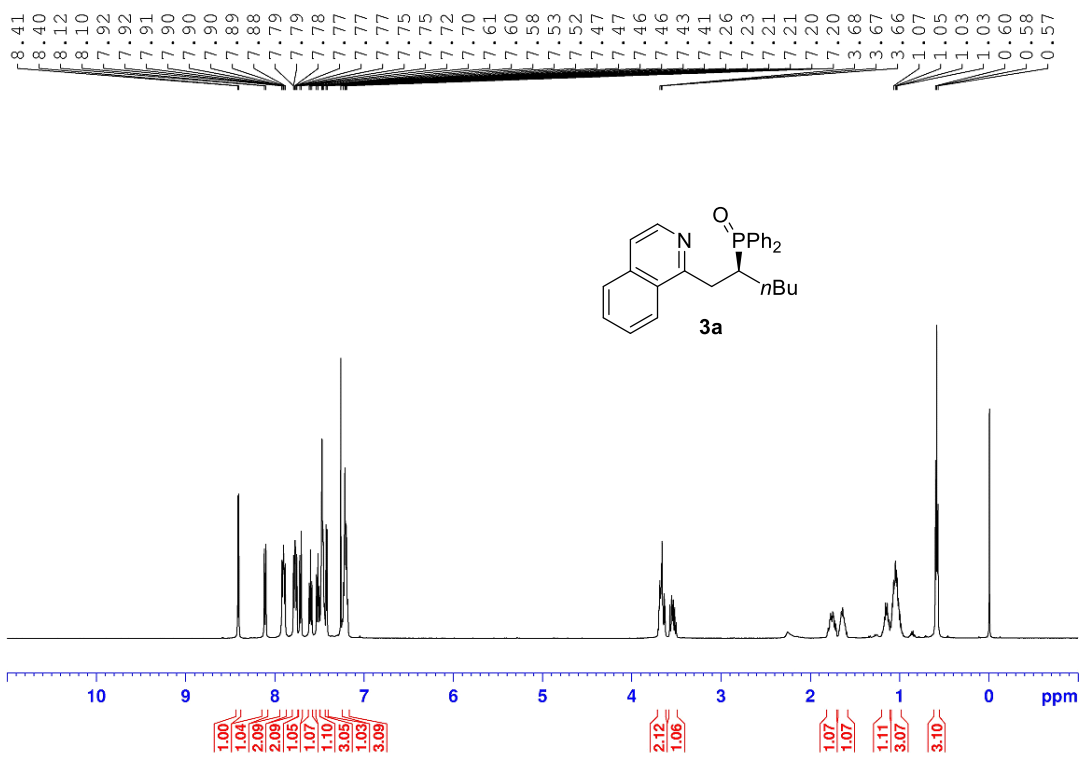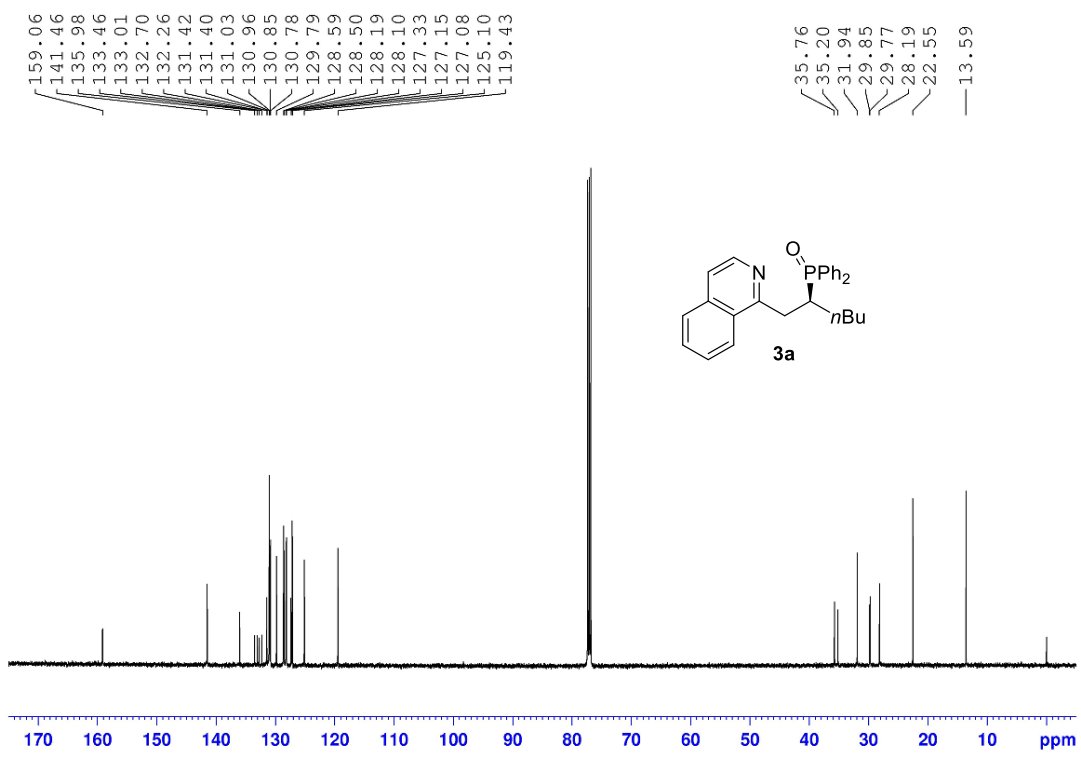

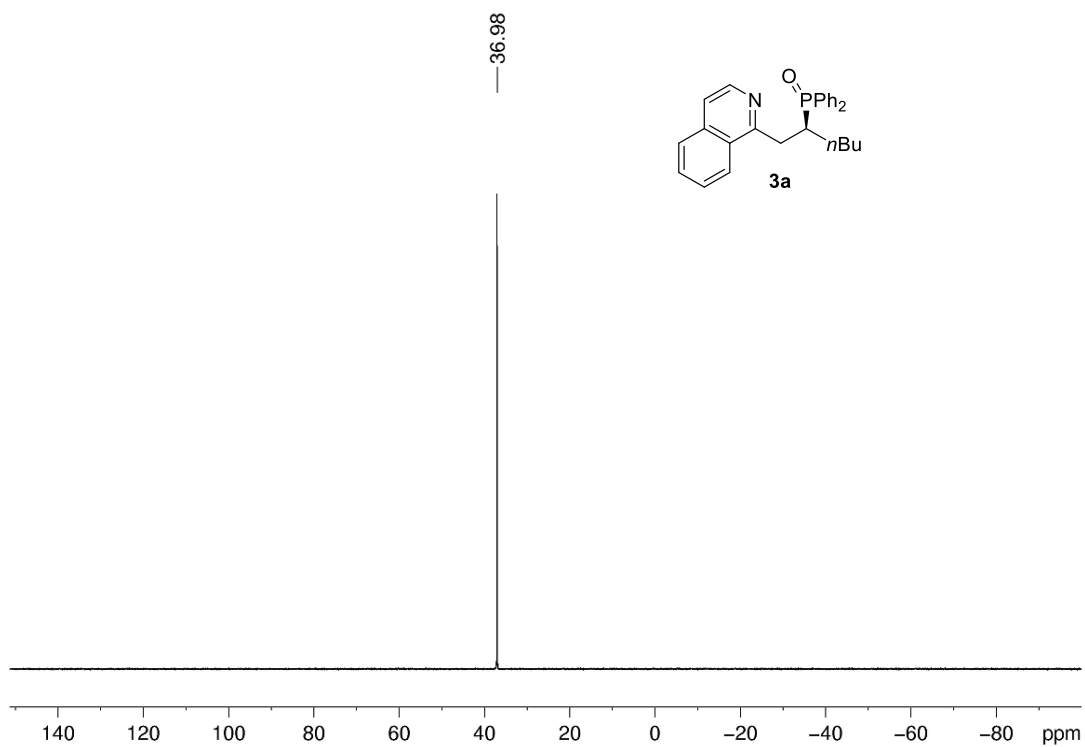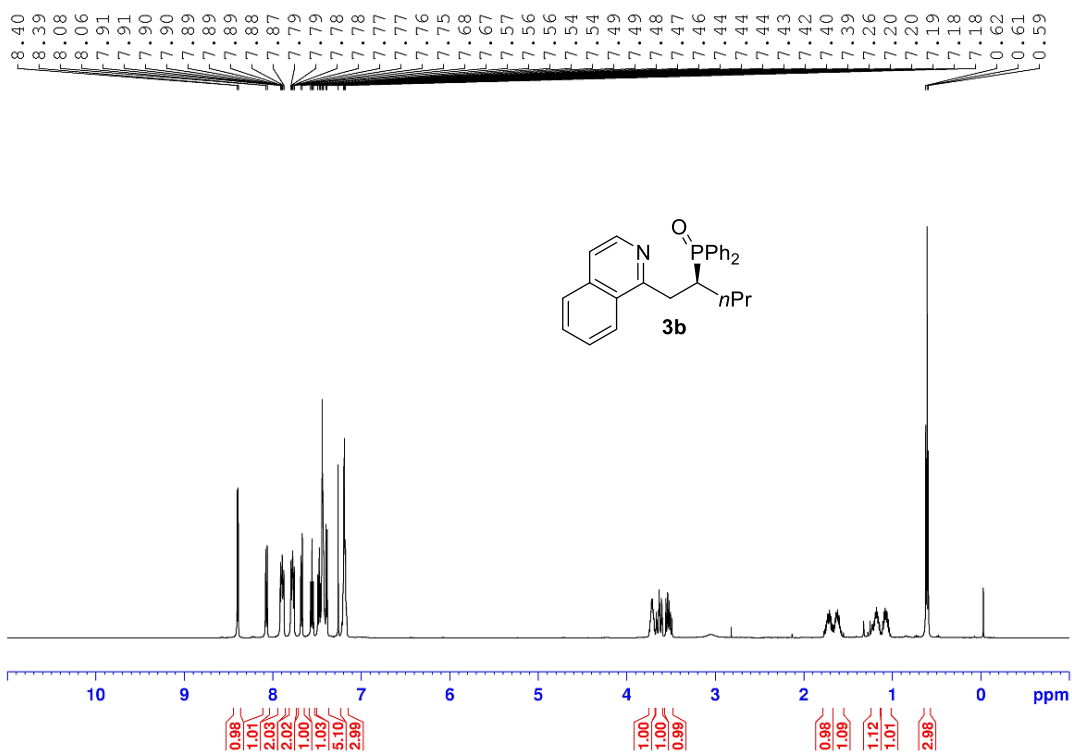

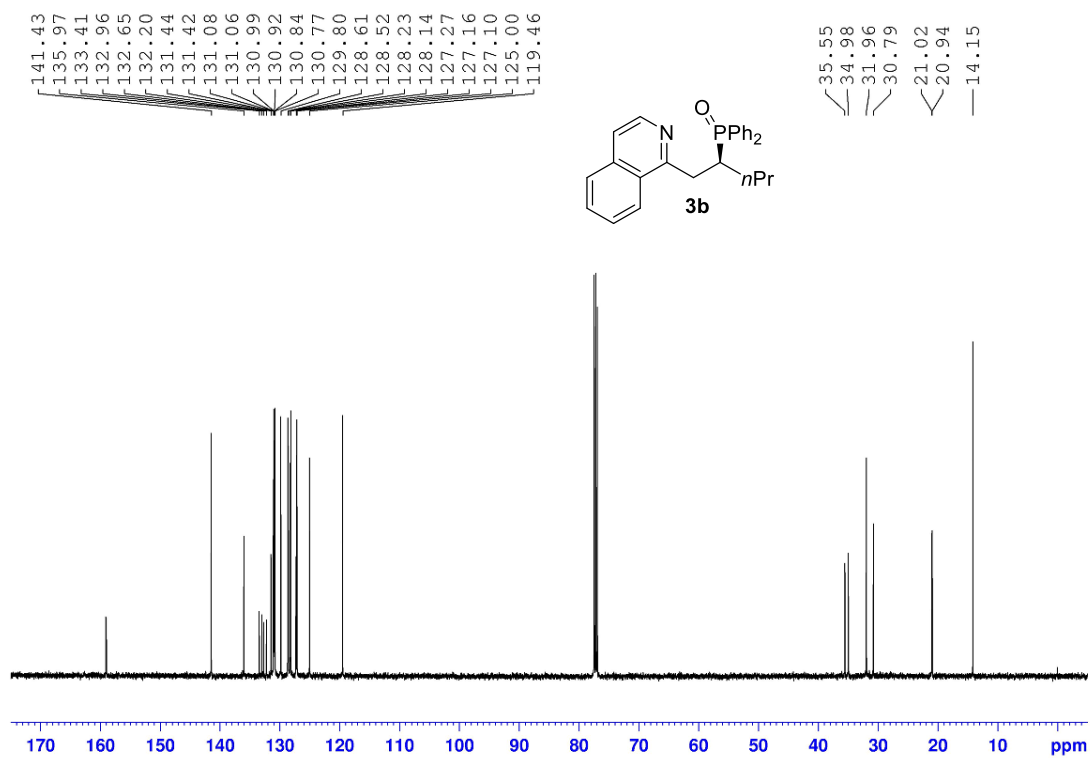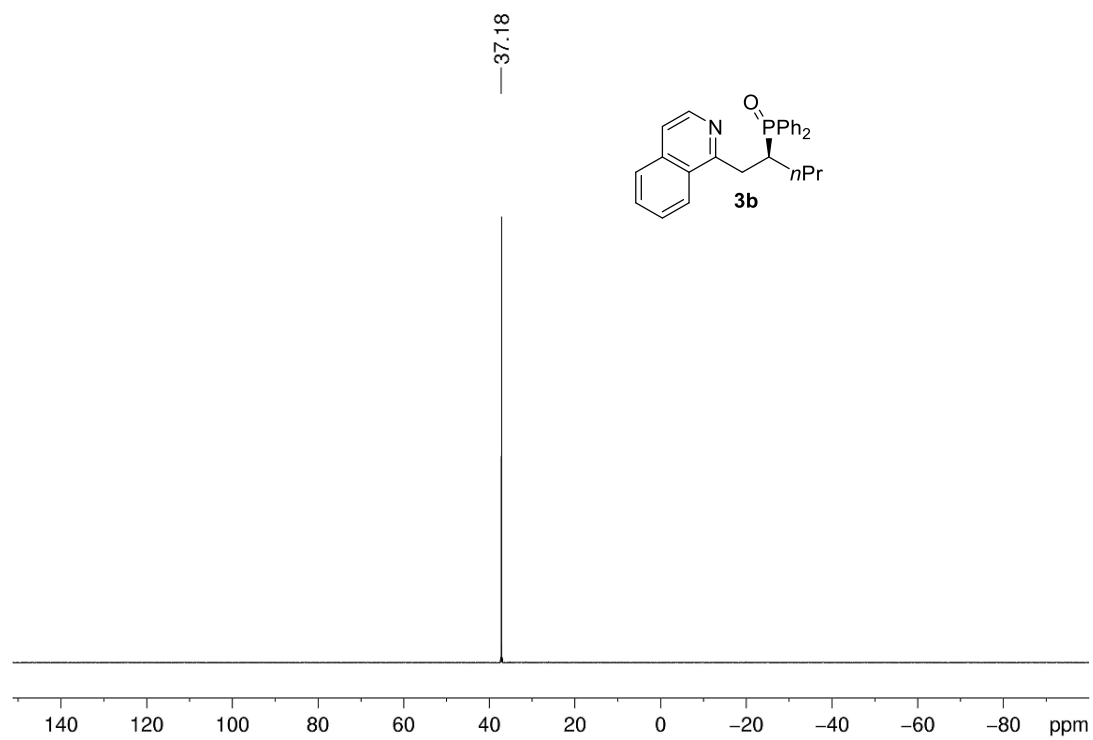

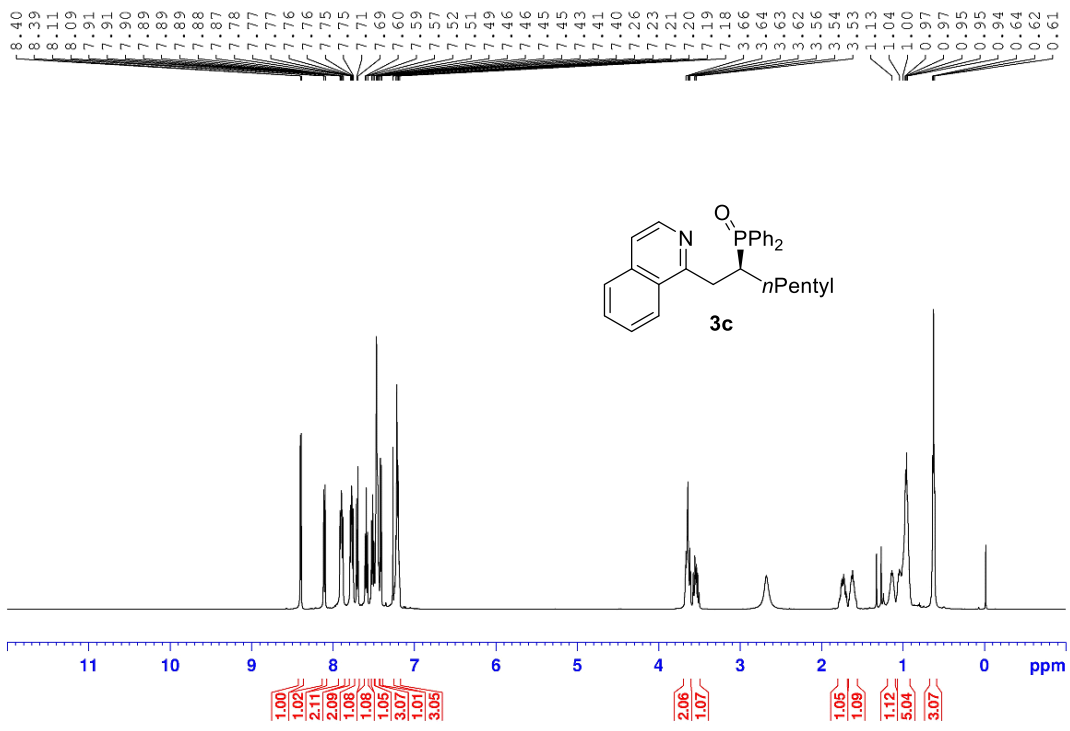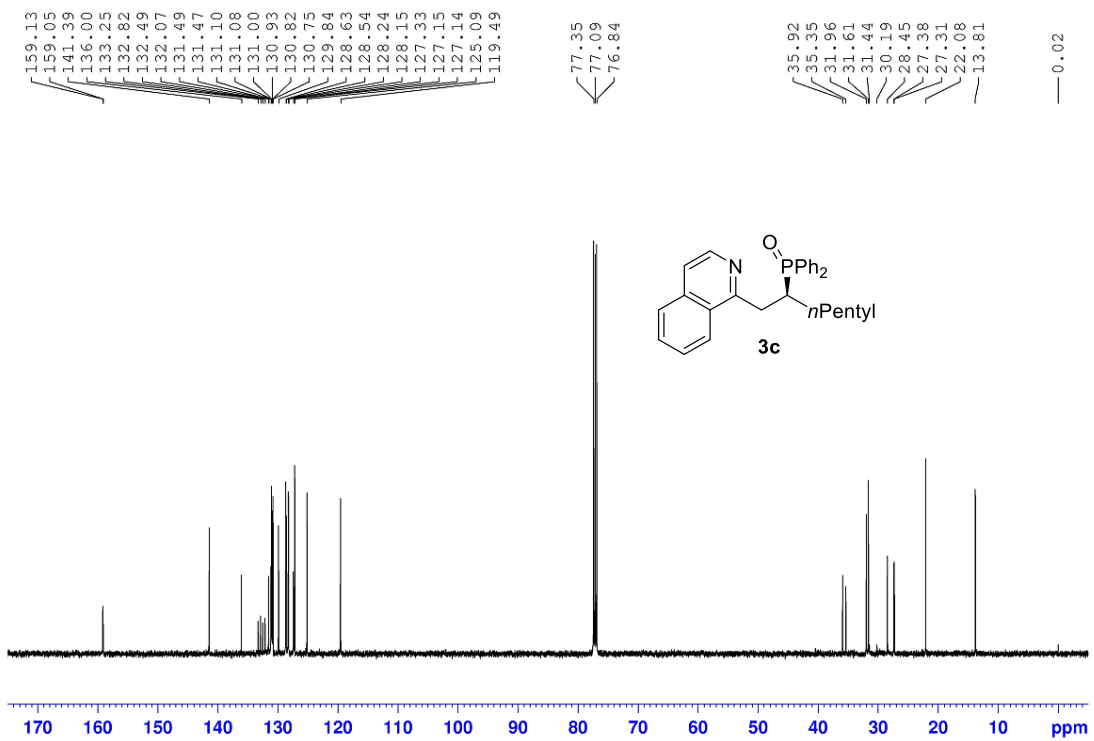

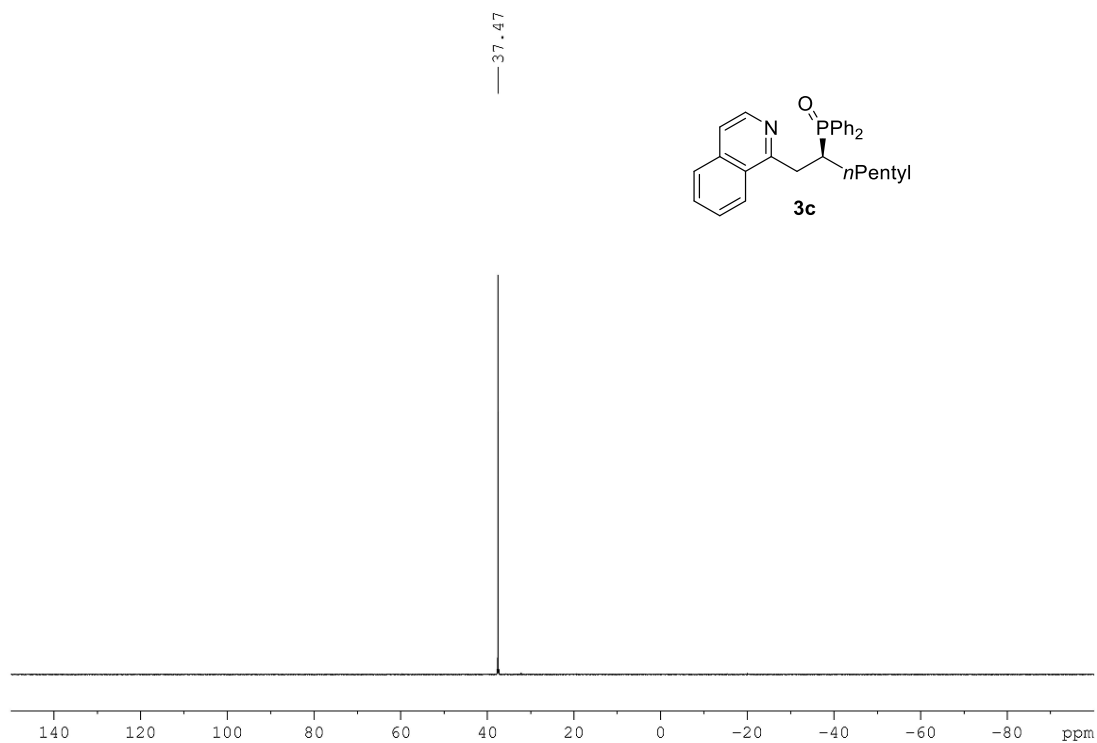

8.28  
8.27  
7.99  
7.97  
7.89  
7.88  
7.87  
7.87  
7.87  
7.85  
7.77  
7.76  
7.76  
7.75  
7.75  
7.74  
7.74  
7.62  
7.60  
7.55  
7.53  
7.52  
7.47  
7.45  
7.43  
7.41  
7.39  
7.39  
7.39  
7.38  
7.38  
7.37  
7.37  
7.36  
7.35  
7.28  
7.27  
7.26  
7.17  
7.15  
7.15  
7.14  
7.14  
7.13  
7.13  
7.12  
6.99  
6.97  
6.95  
6.94  
6.92  
6.91  
6.89  
6.89  
4.14  
4.13  
3.65  
3.64  
3.55  
3.54  
3.15  
2.96

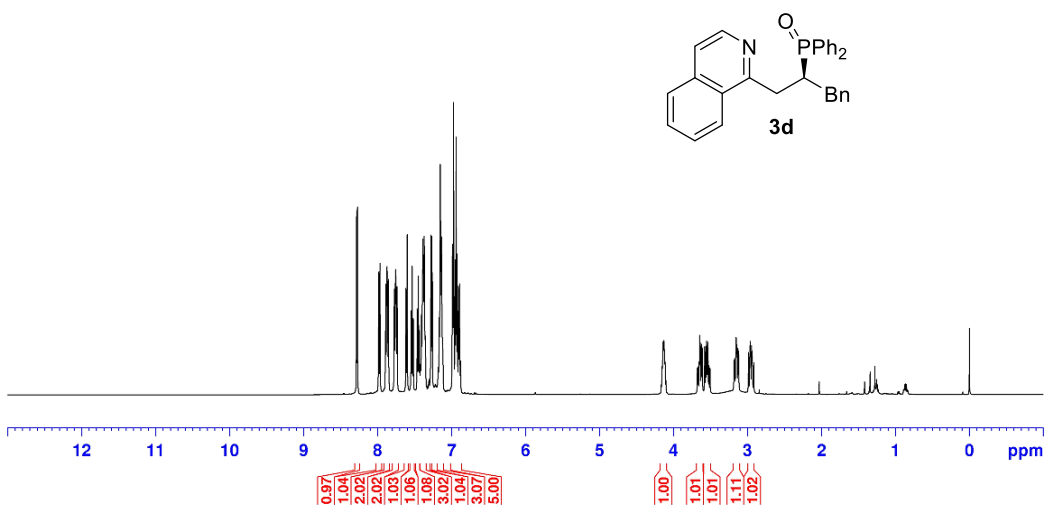

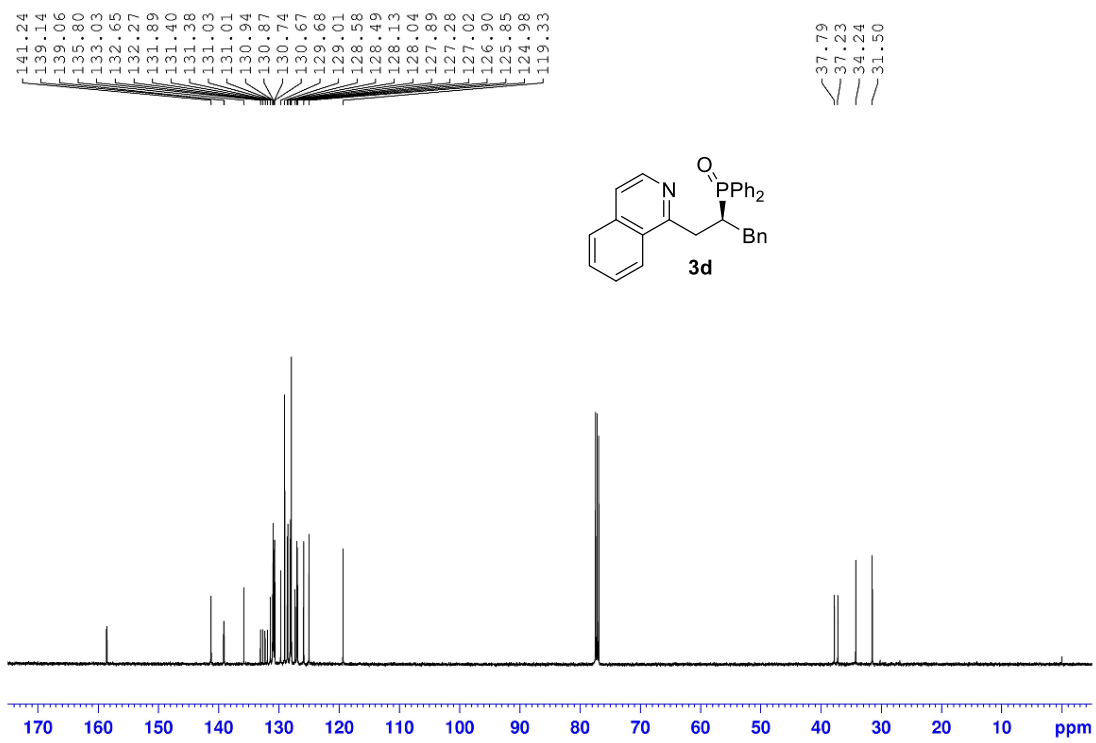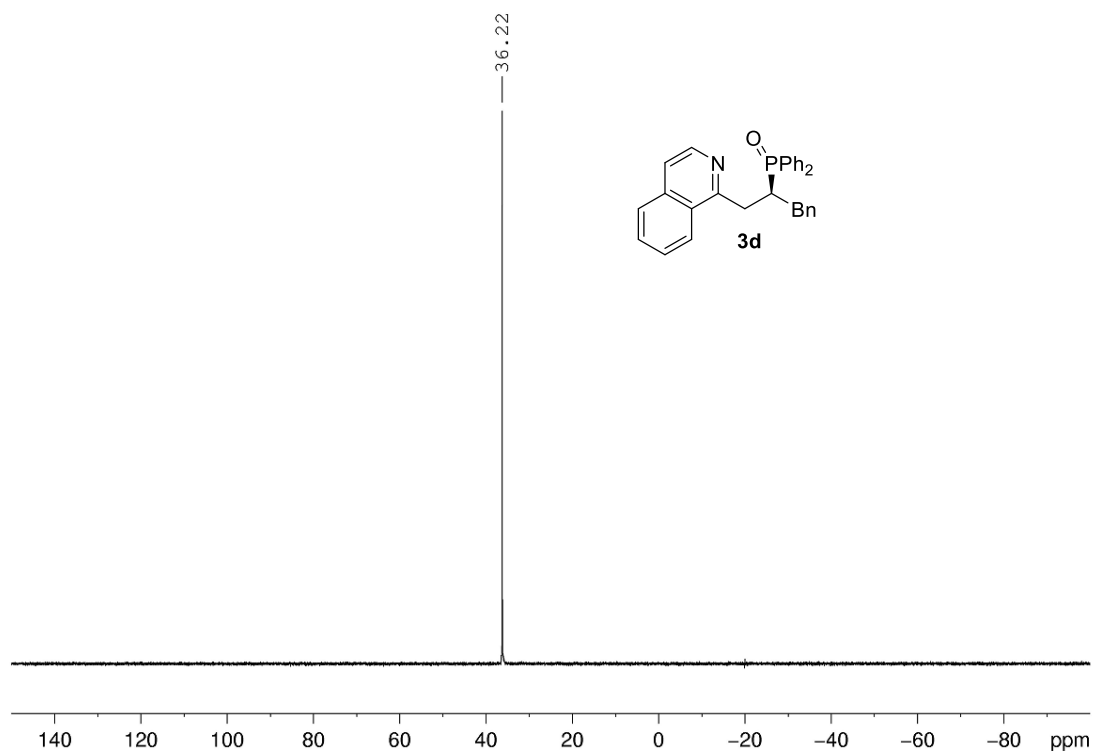



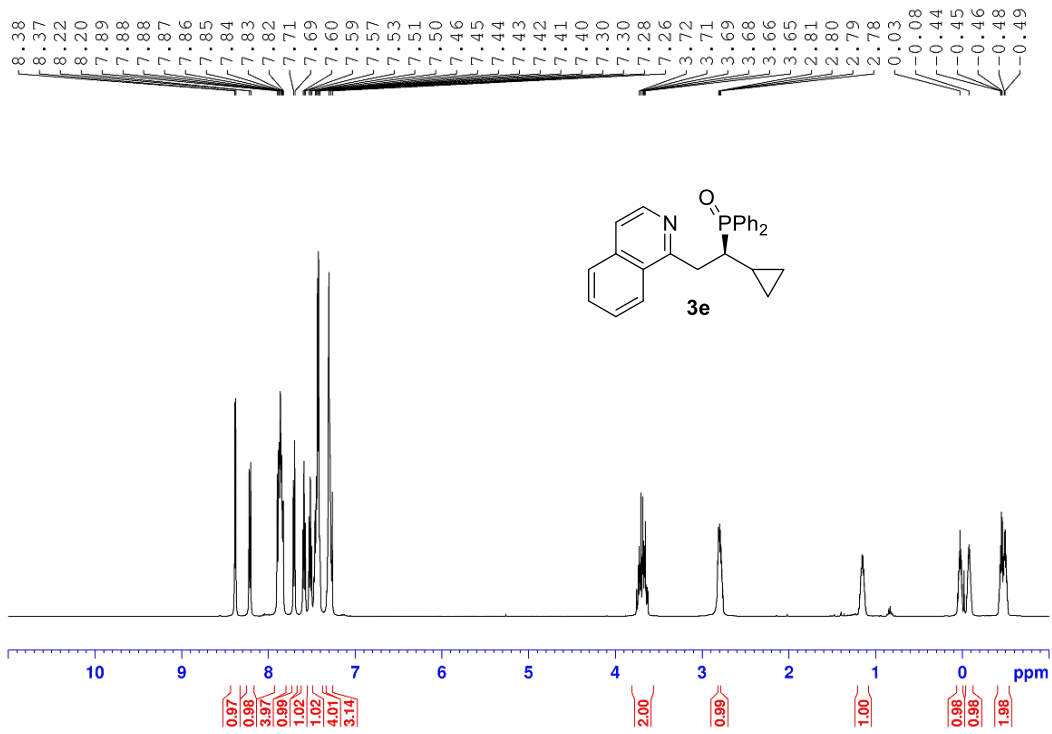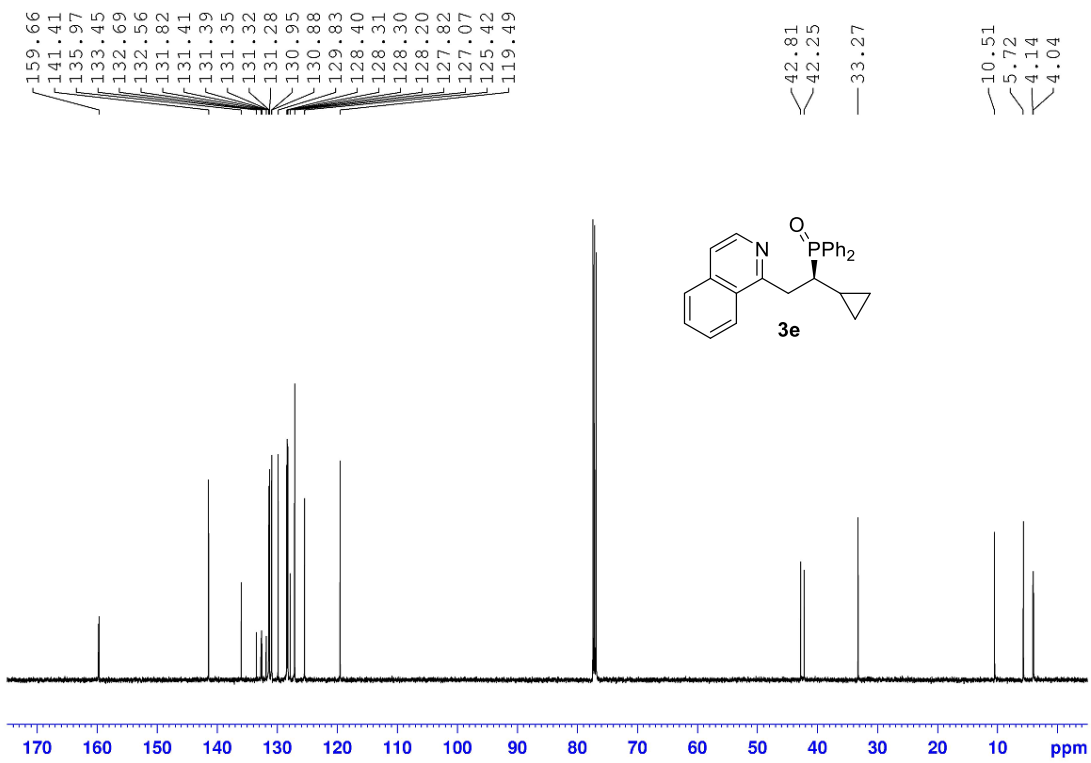

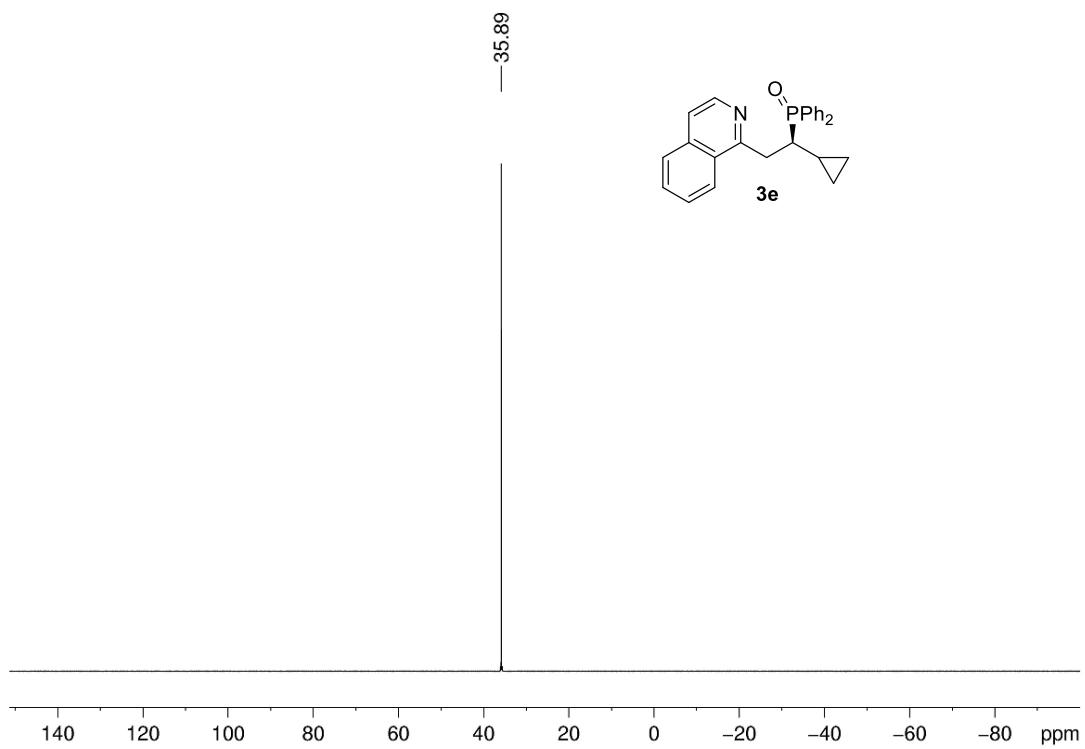

8.40  
8.39  
8.19  
8.18  
7.98  
7.97  
7.96  
7.96  
7.95  
7.94  
7.88  
7.86  
7.86  
7.86  
7.85  
7.84  
7.84  
7.71  
7.70  
7.60  
7.59  
7.58  
7.56  
7.56  
7.54  
7.46  
7.45  
7.44  
7.43  
7.43  
7.42  
7.41  
7.26  
7.14  
7.12  
7.11  
7.09  
7.08  
7.00  
6.98  
6.20  
6.19  
6.19  
6.18  
6.16  
6.15  
3.86  
3.78

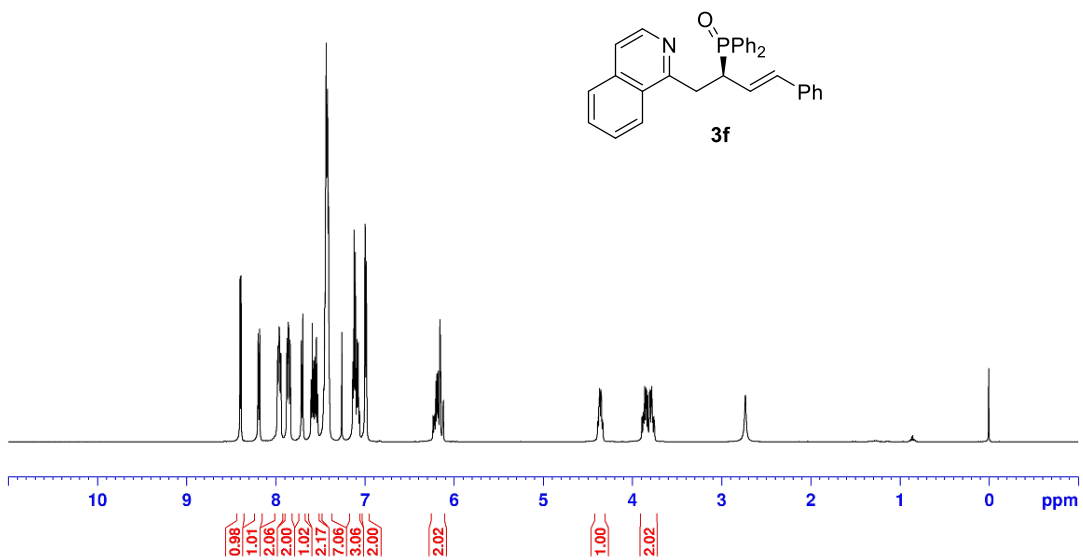

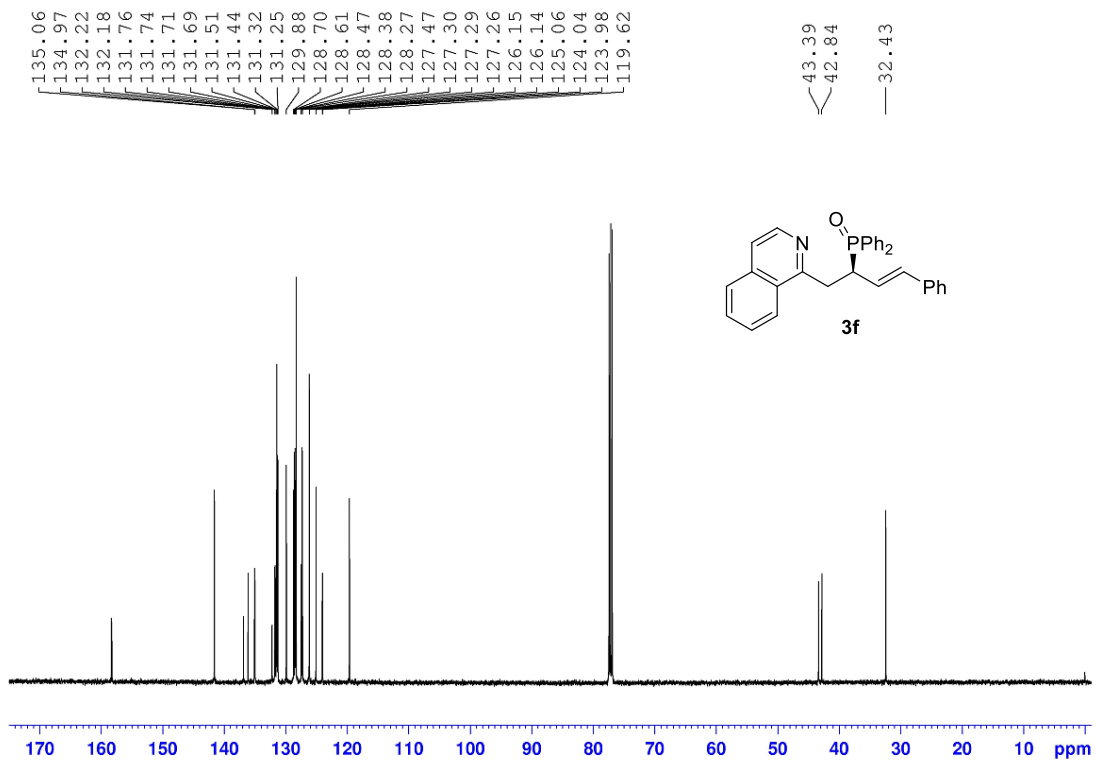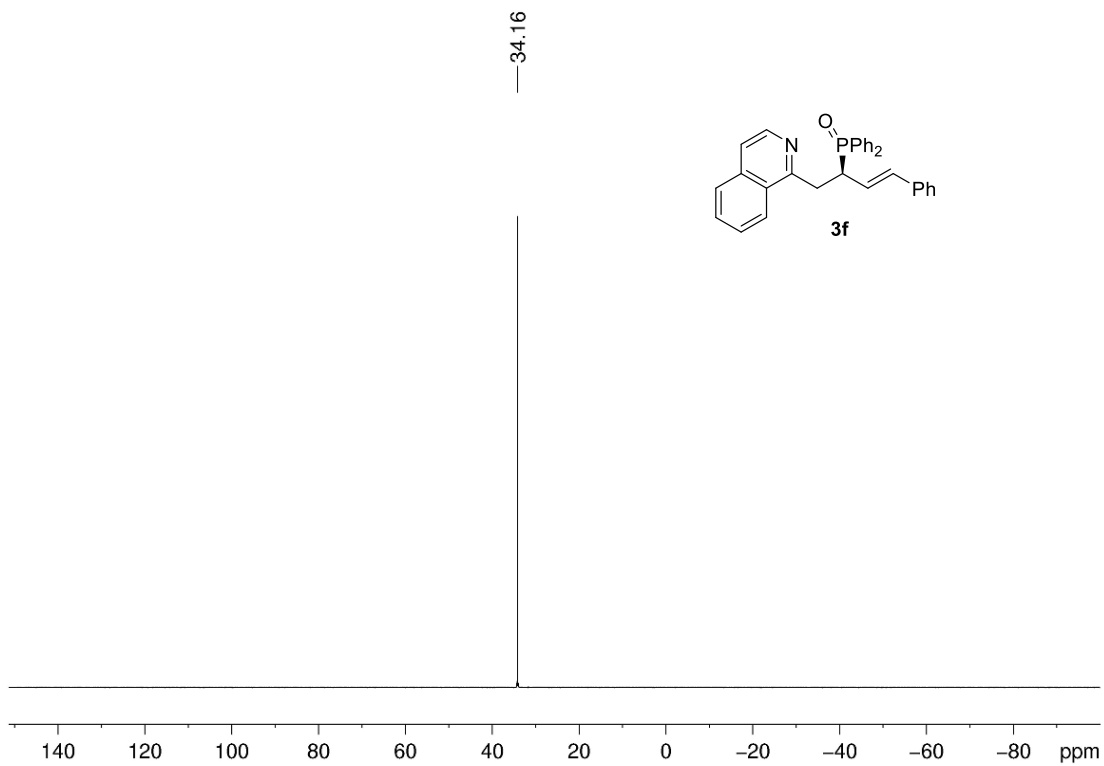

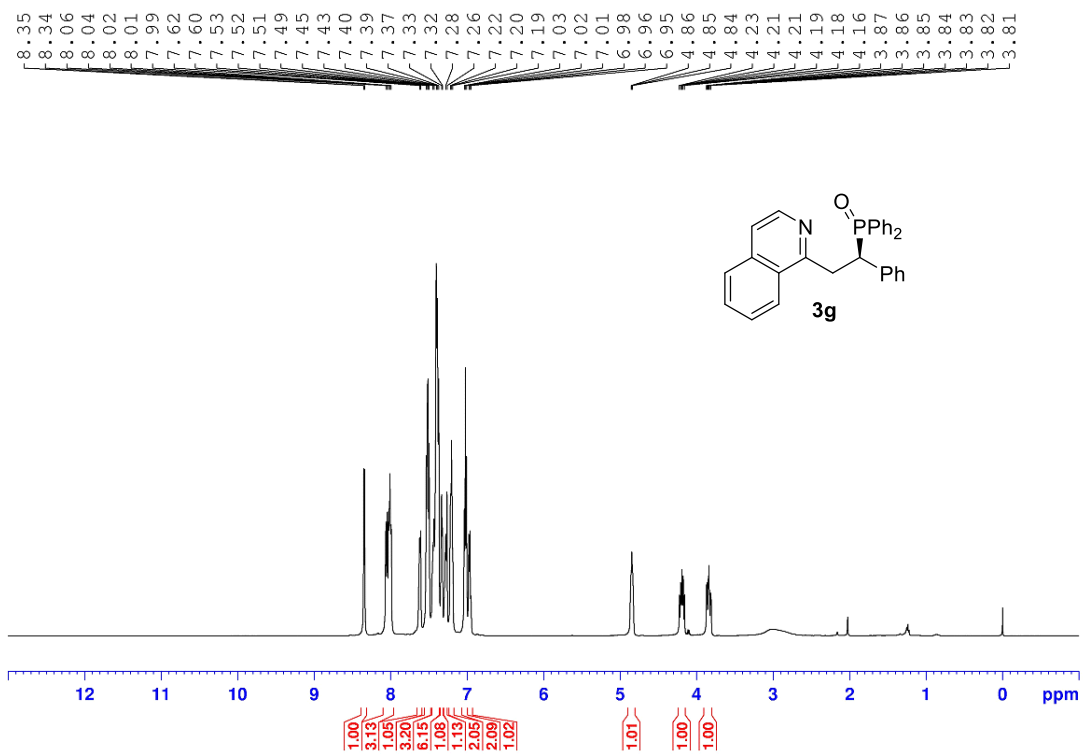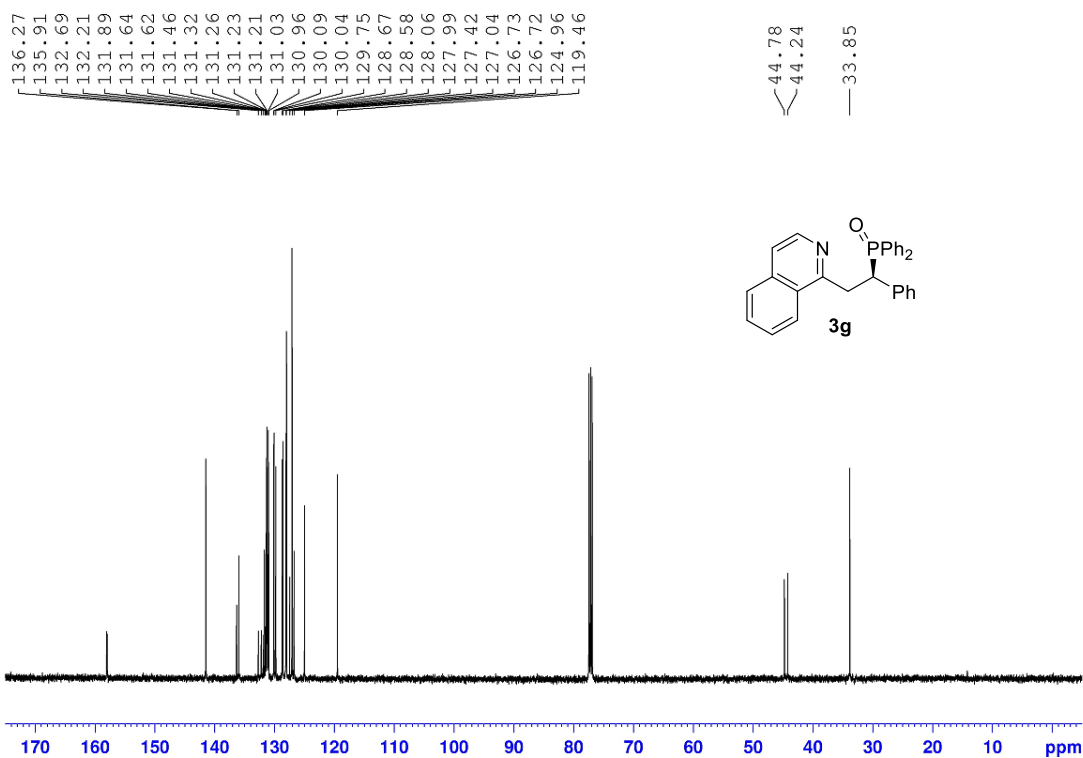

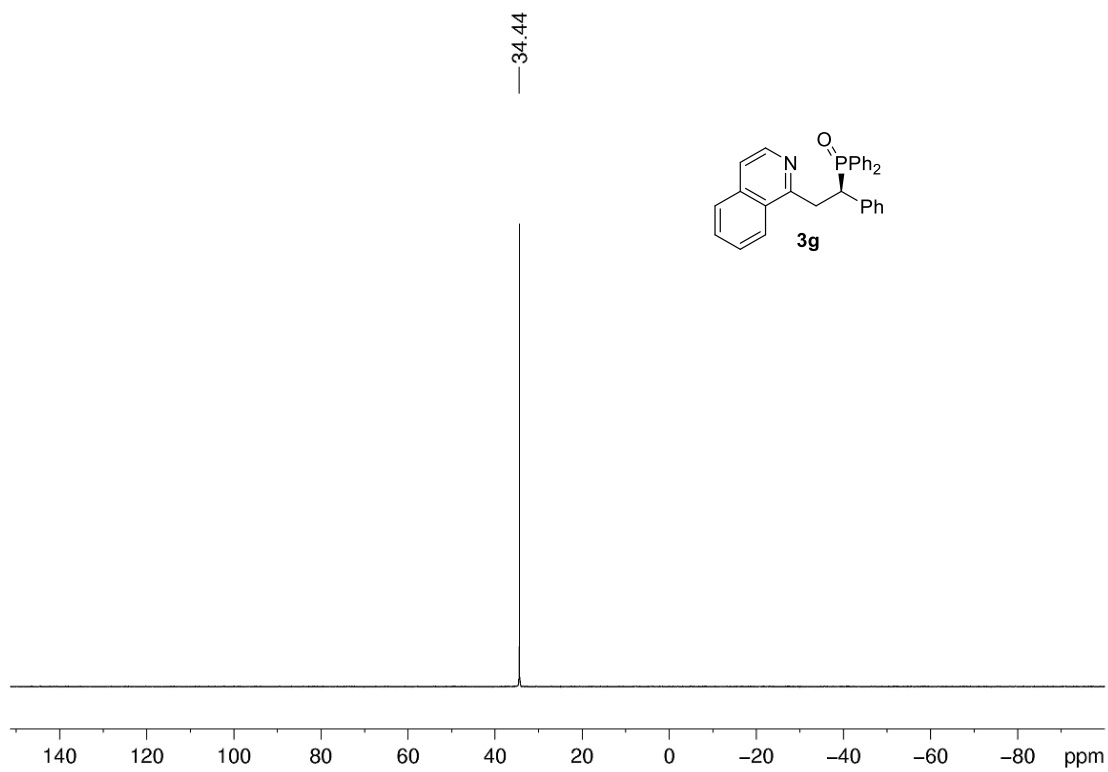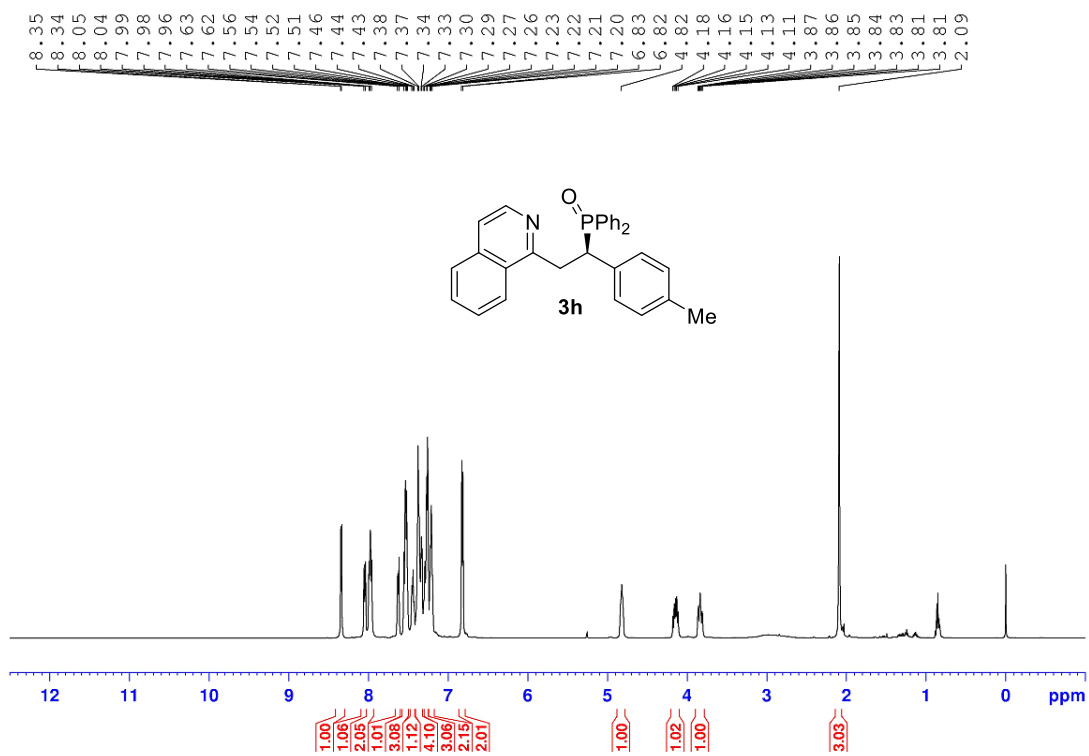

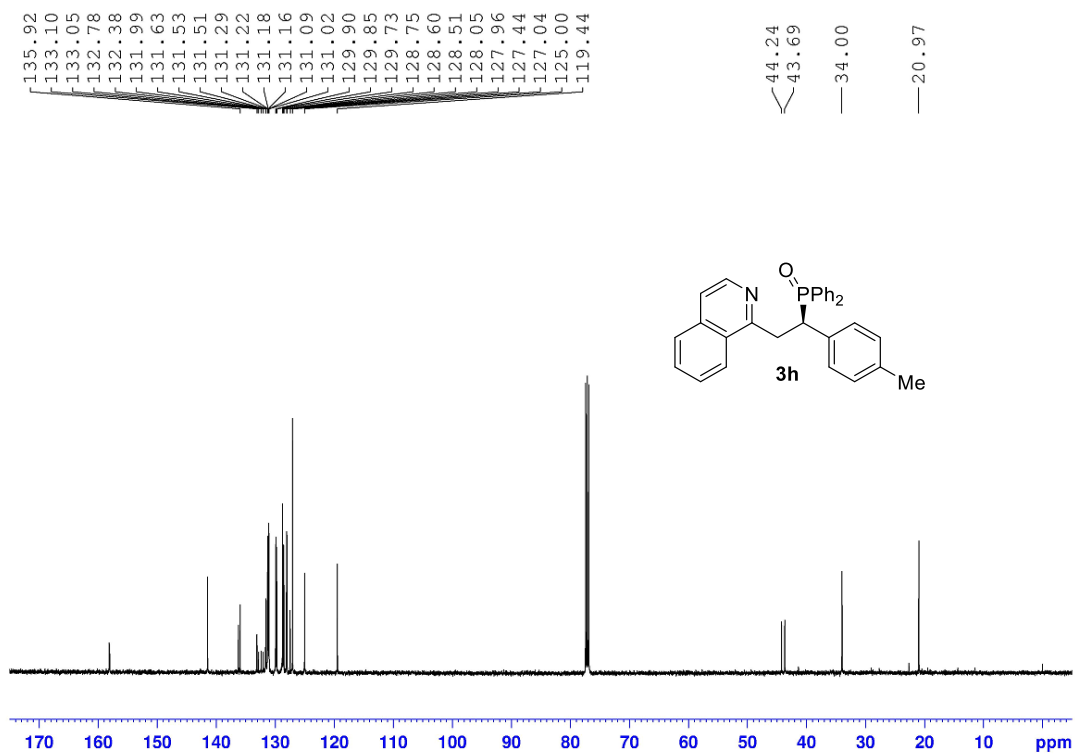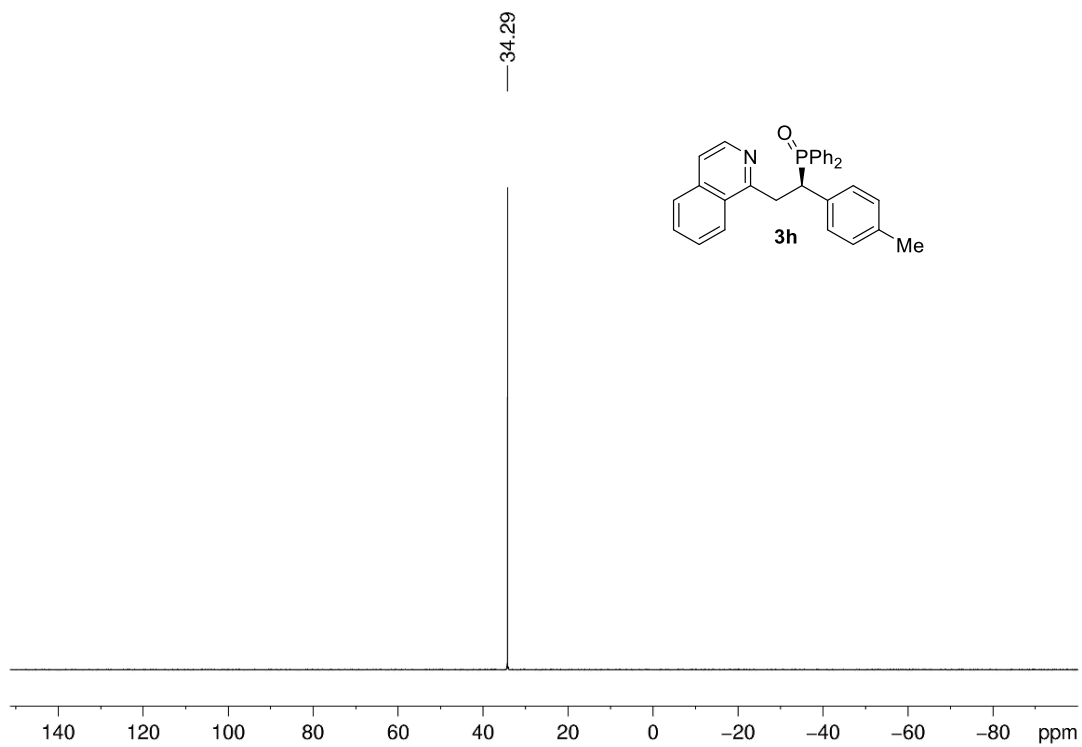

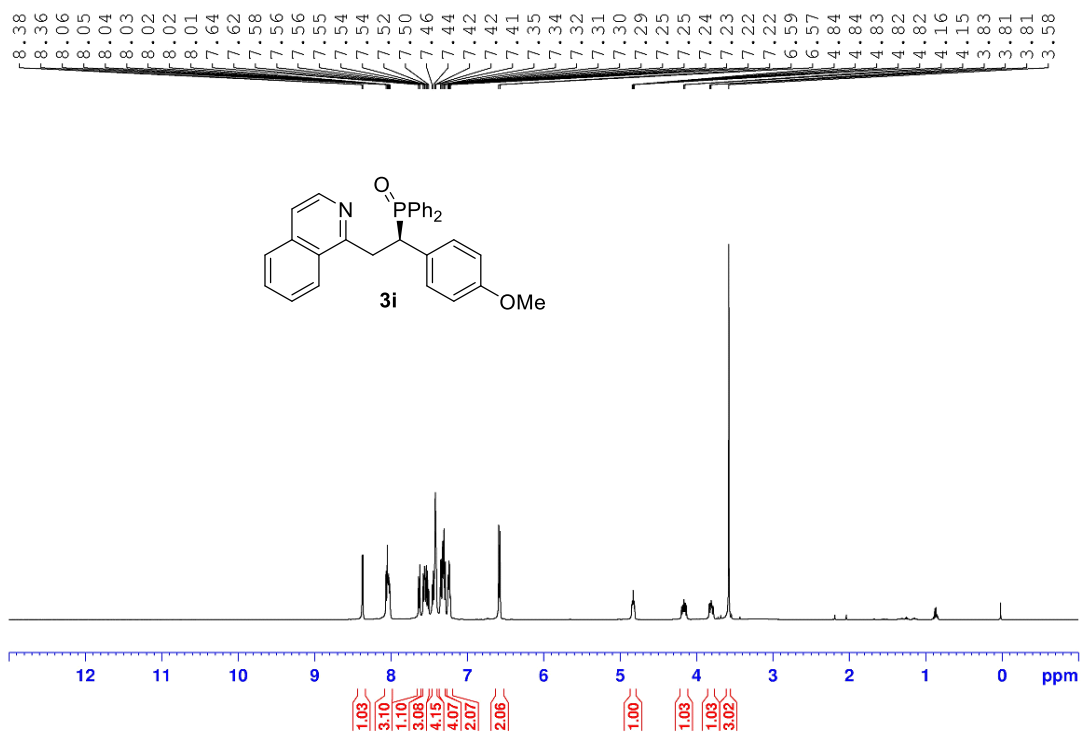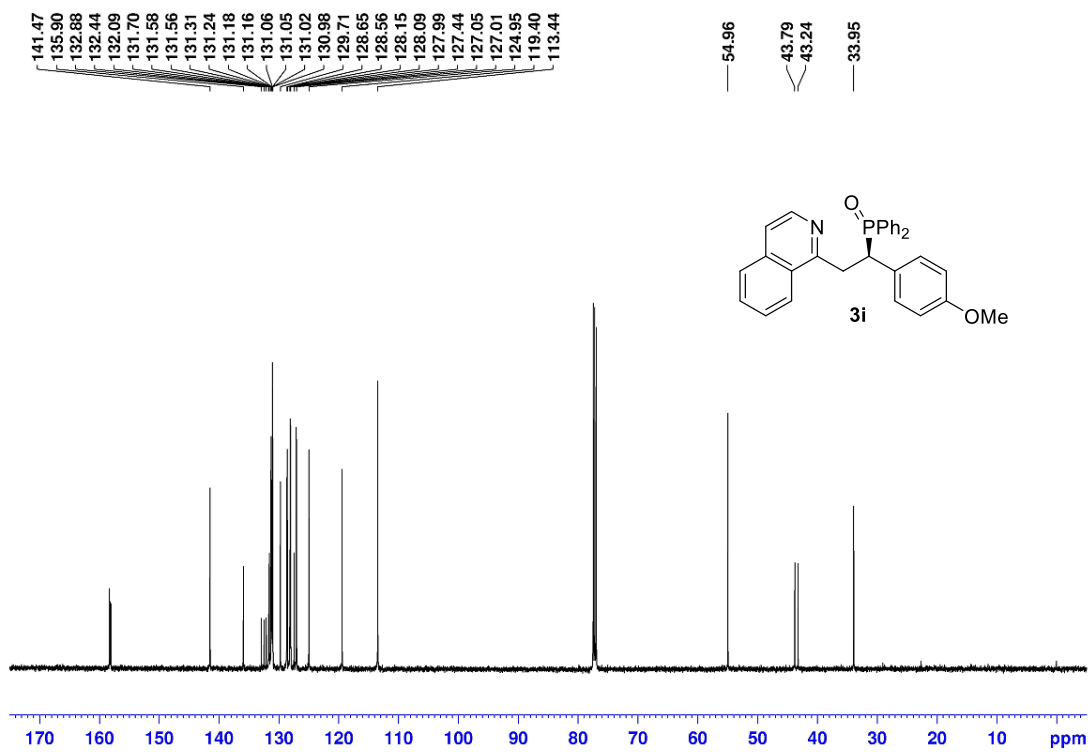

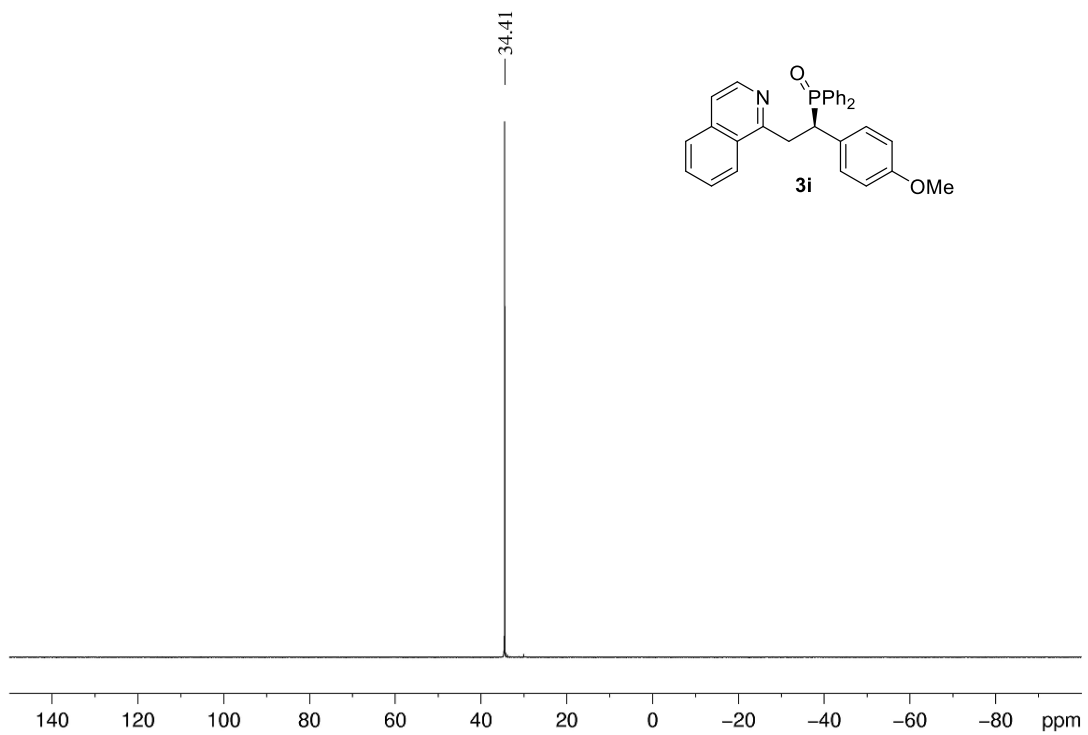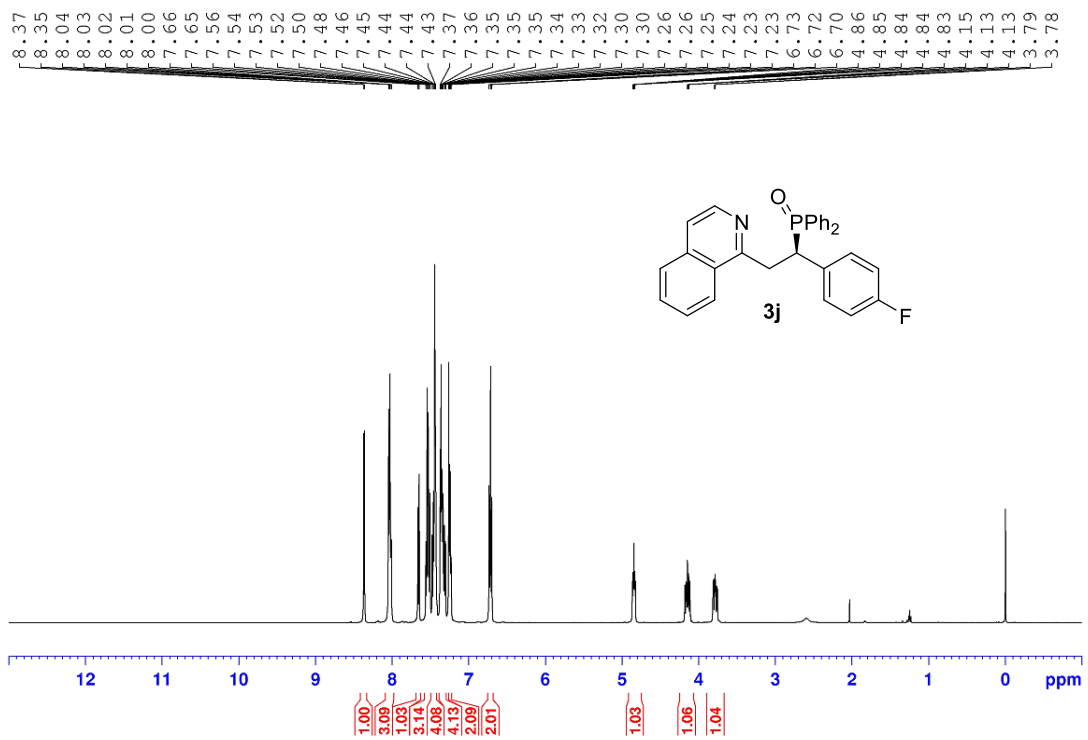



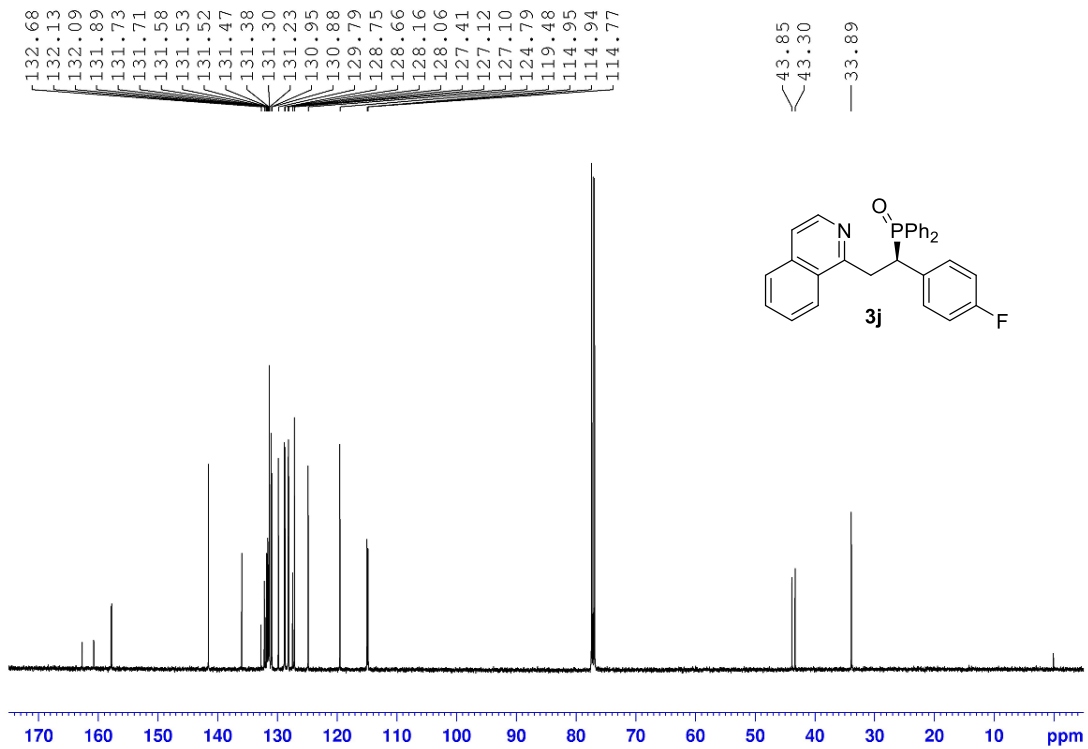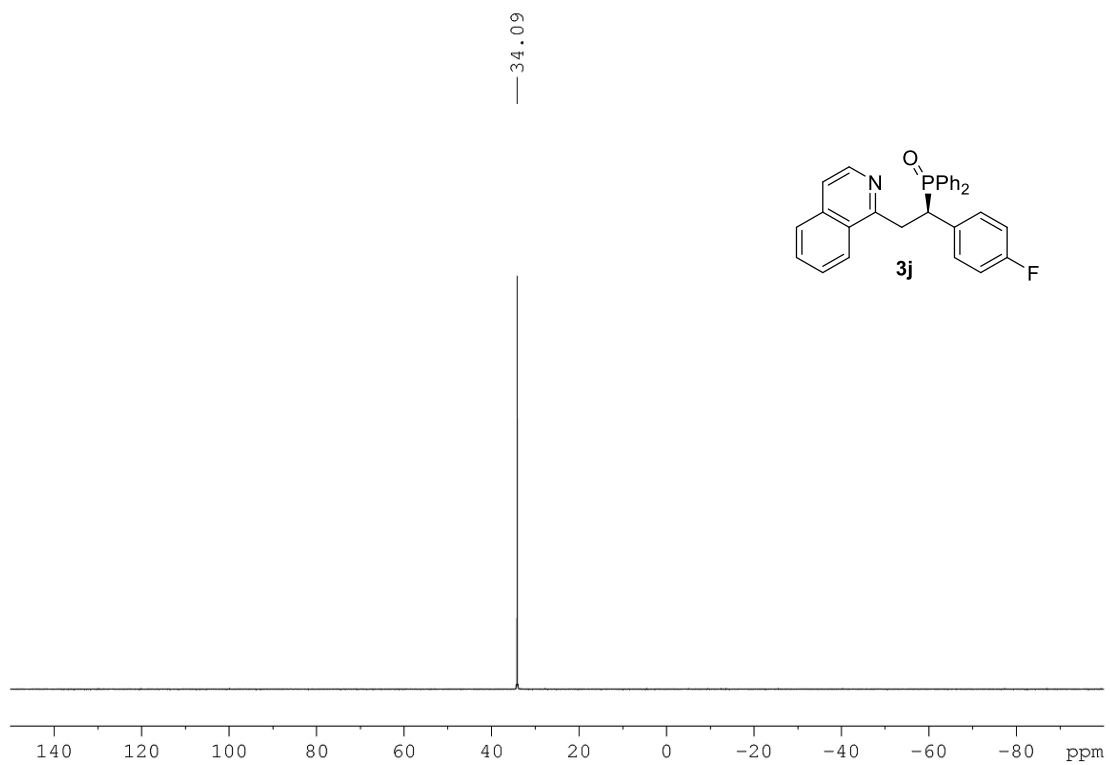

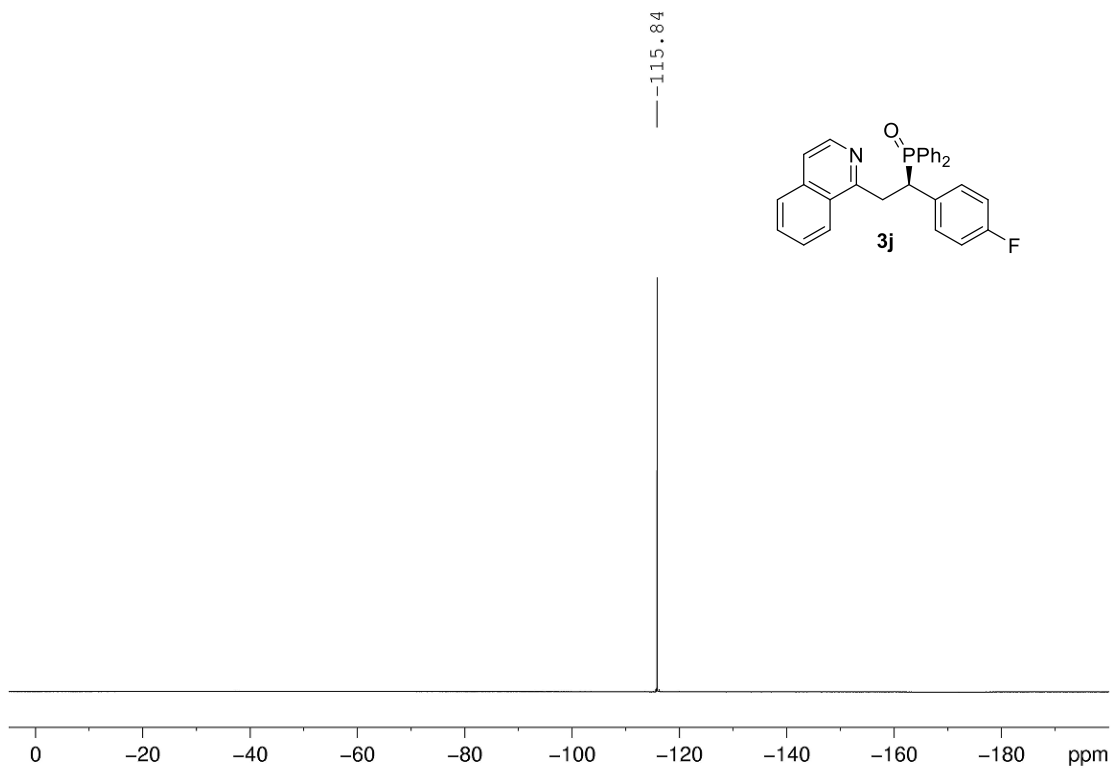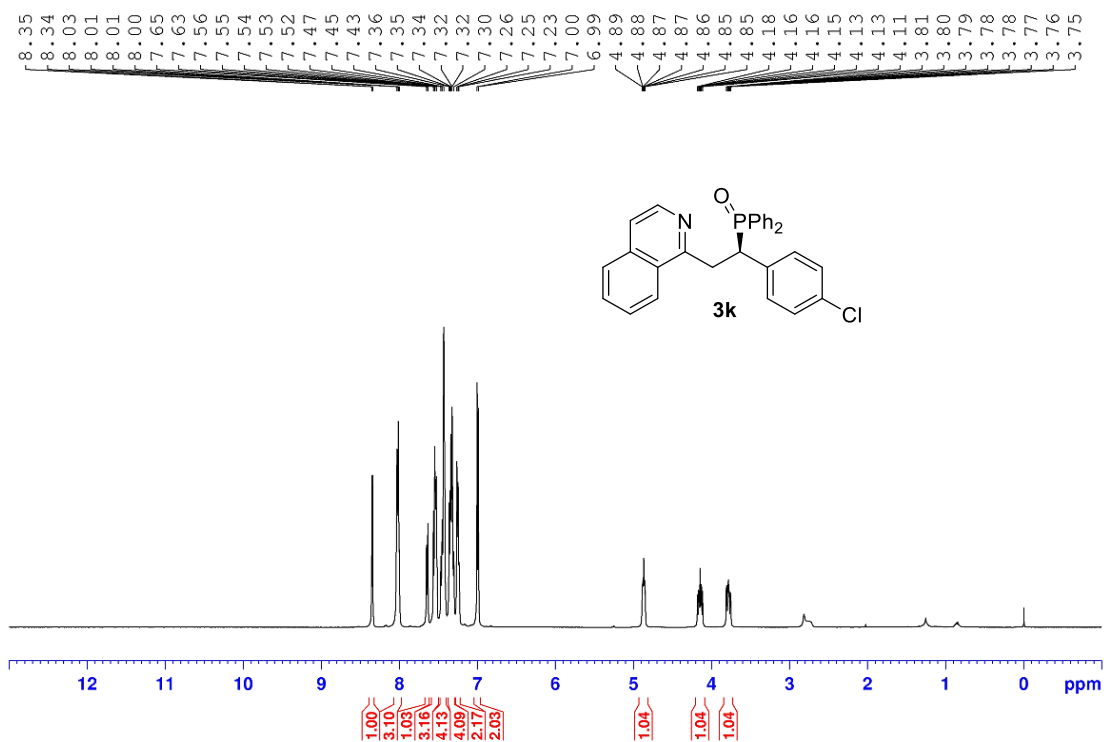

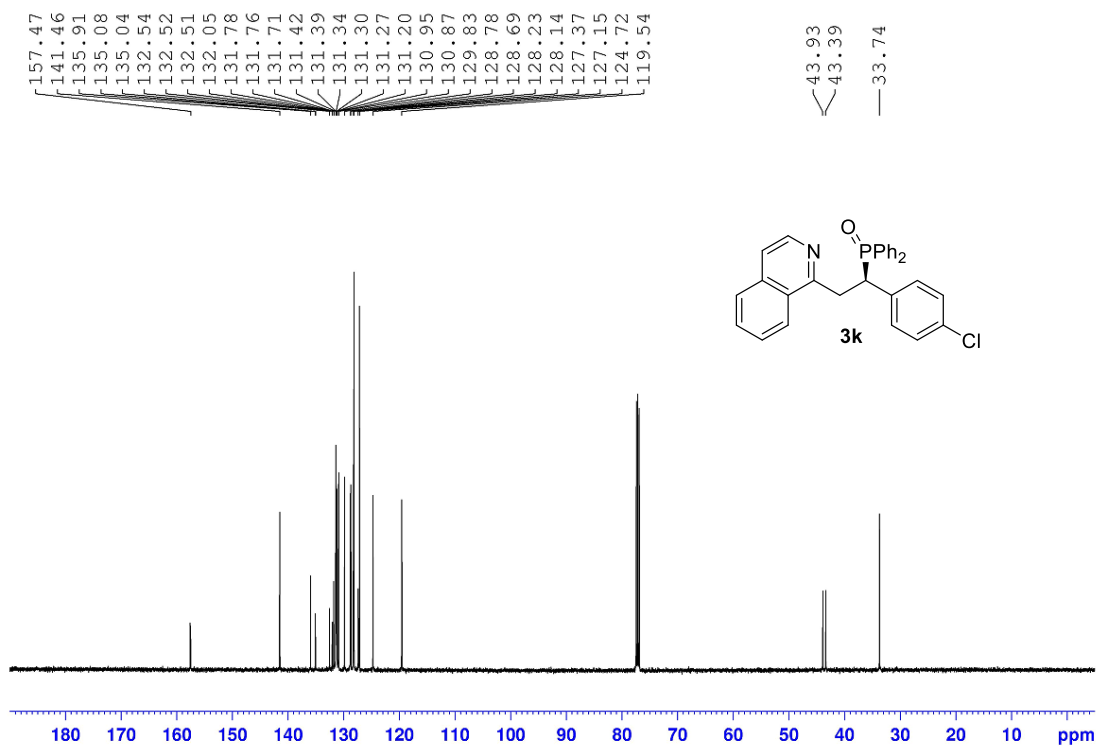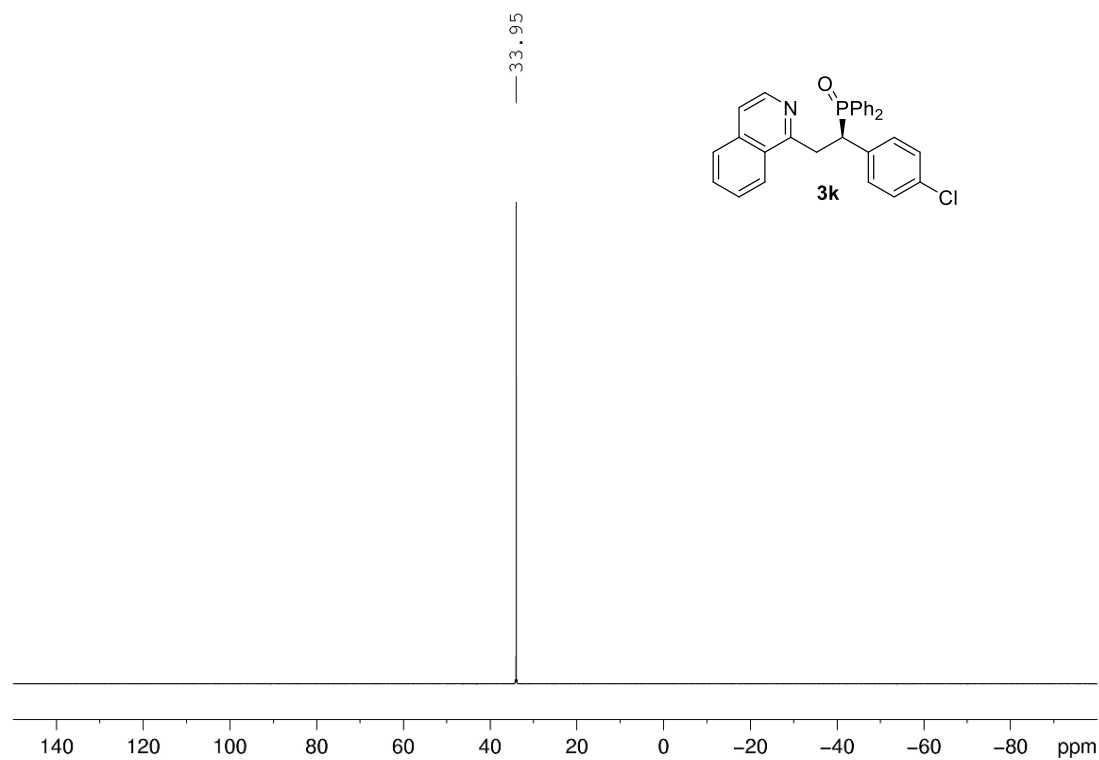

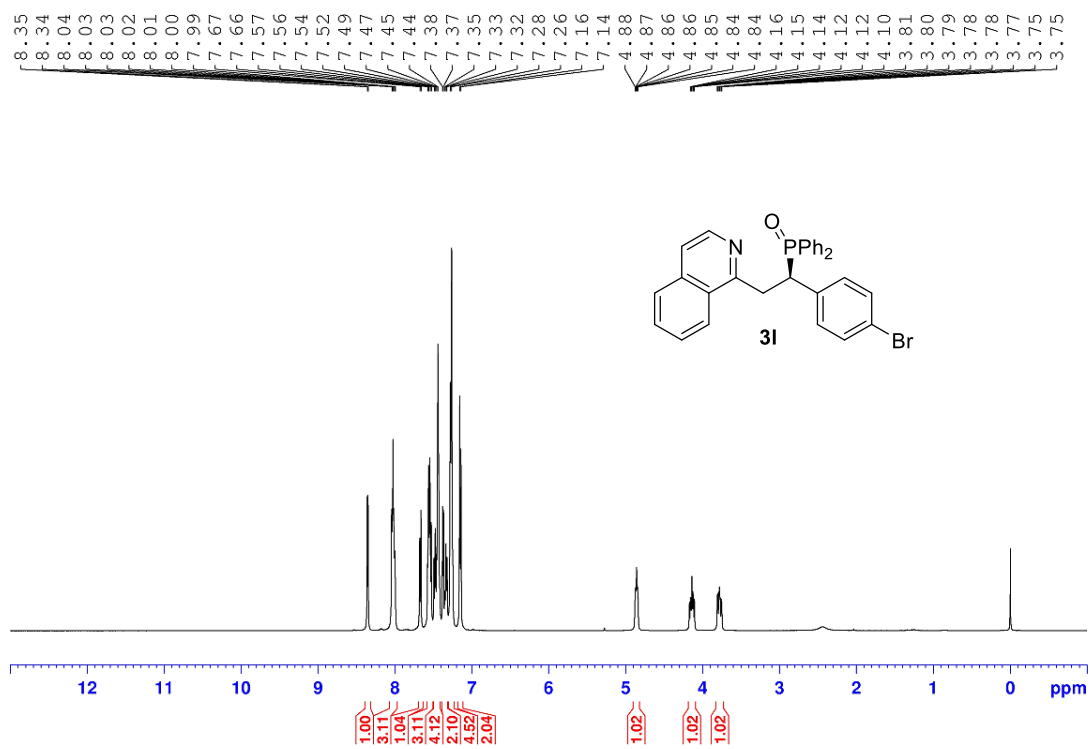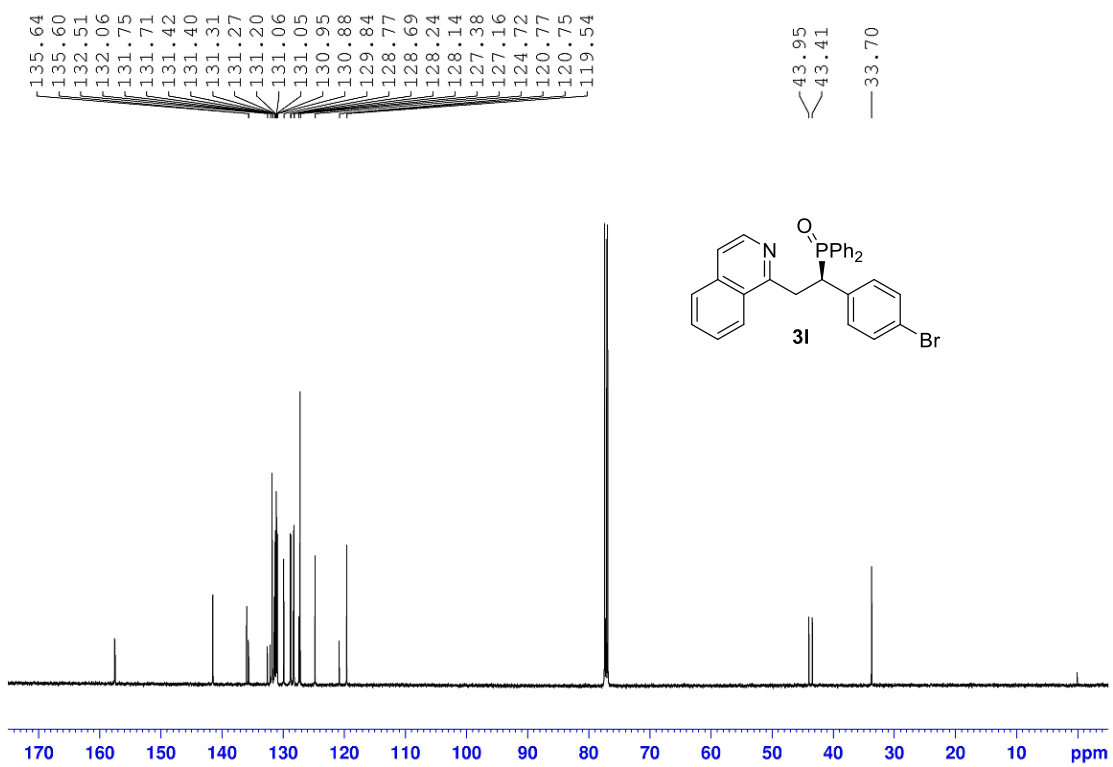

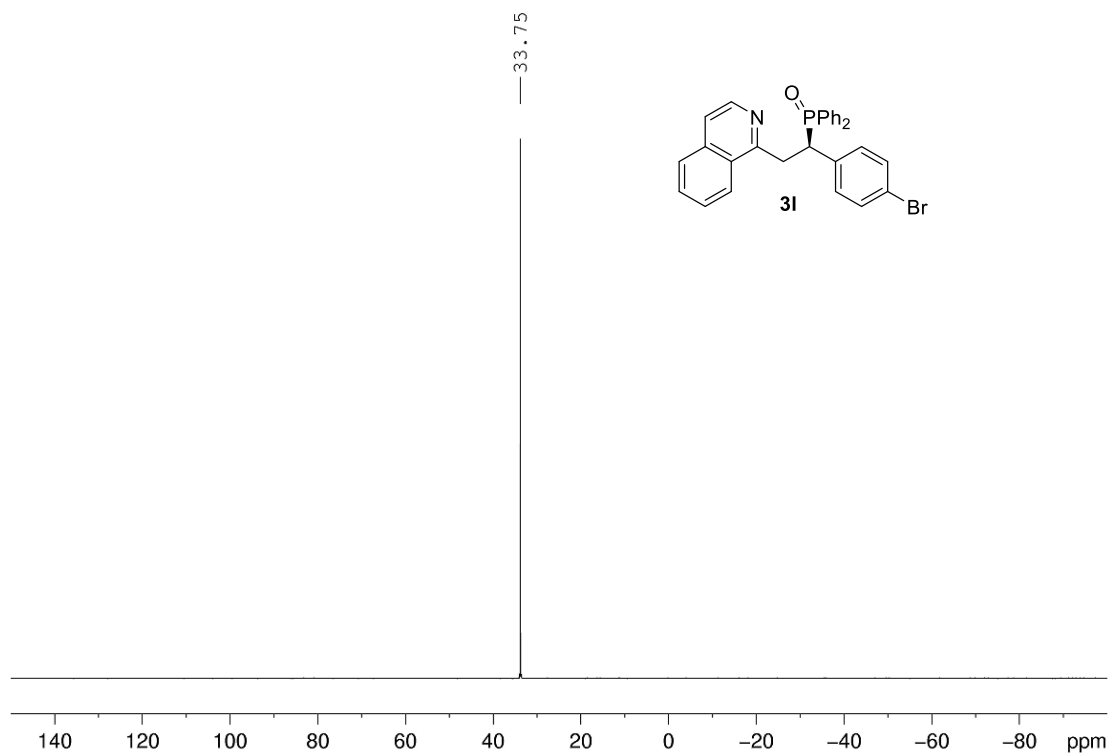

8.36  
8.35  
8.05  
8.04  
8.03  
8.02  
8.01  
7.65  
7.64  
7.55  
7.53  
7.52  
7.51  
7.49  
7.49  
7.49  
7.47  
7.47  
7.45  
7.44  
7.44  
7.43  
7.42  
7.42  
7.40  
7.40  
7.40  
7.37  
7.36  
7.30  
7.29  
7.26  
7.24  
7.23  
7.22  
7.22  
7.21  
7.20  
7.20  
6.89  
6.87  
4.90  
4.90  
4.89  
4.88  
4.87  
4.16  
4.15  
3.82  
3.81

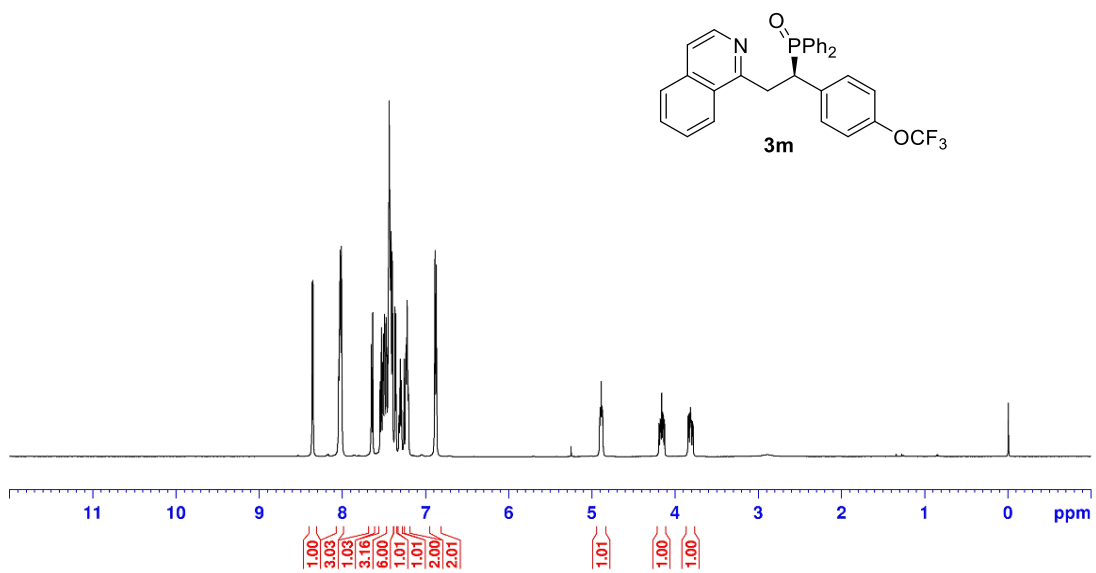

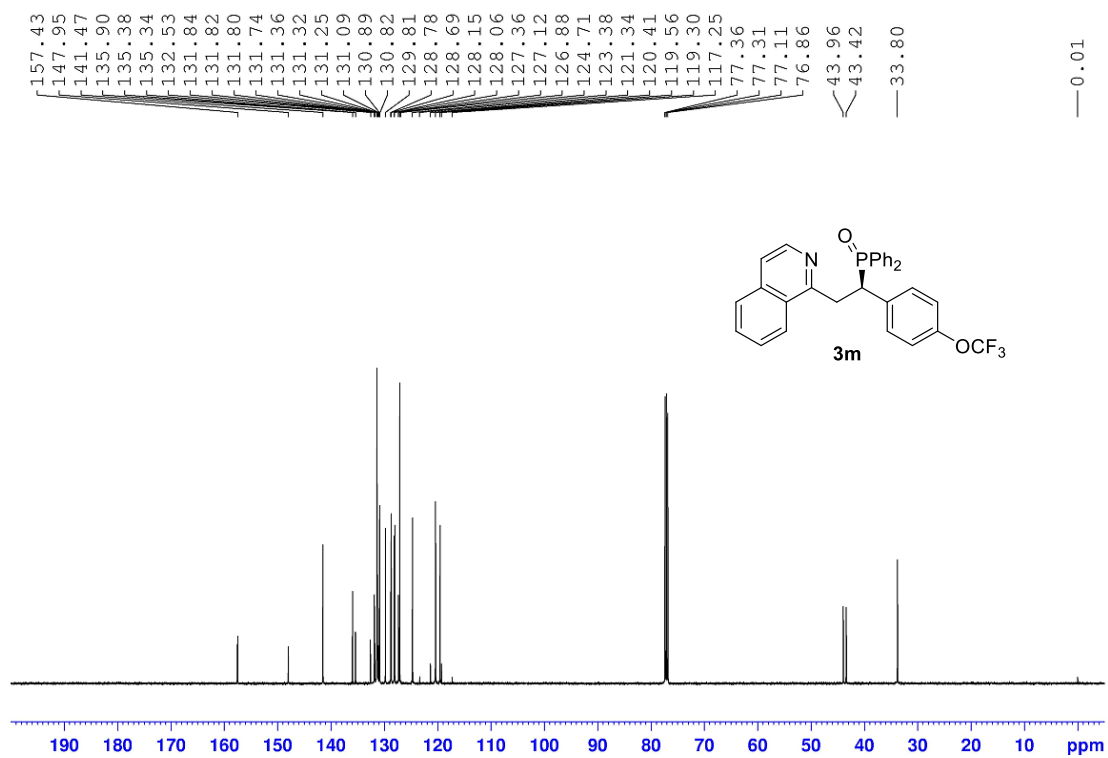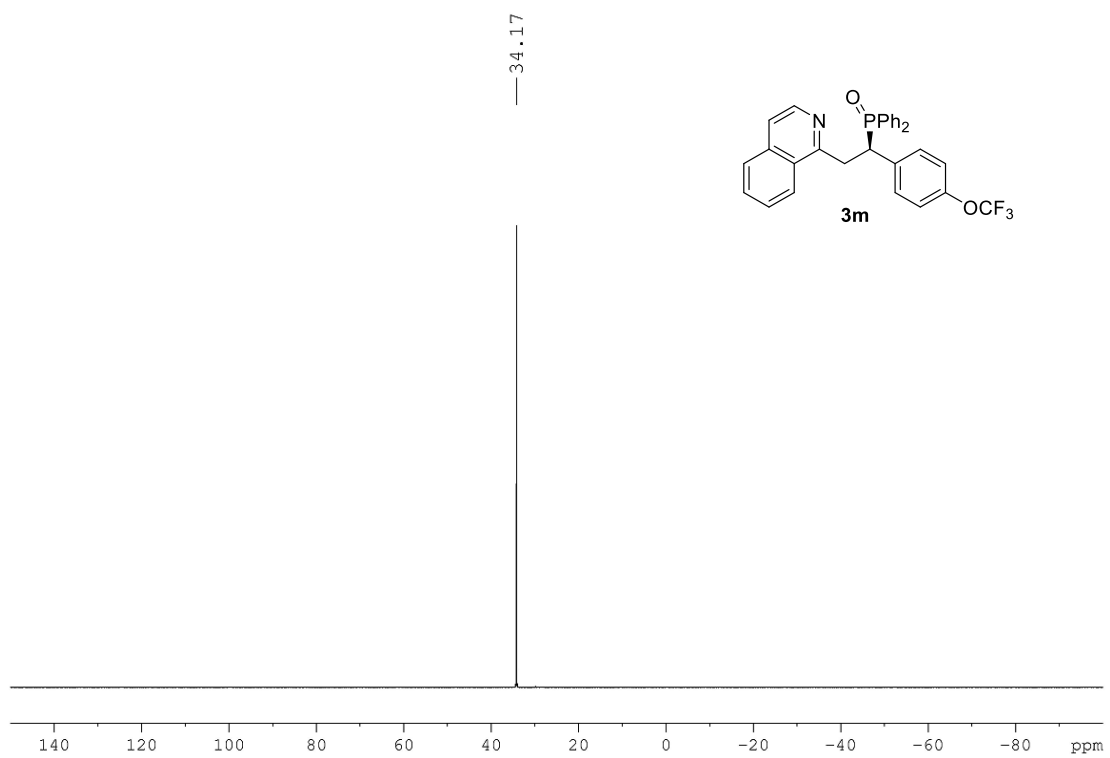

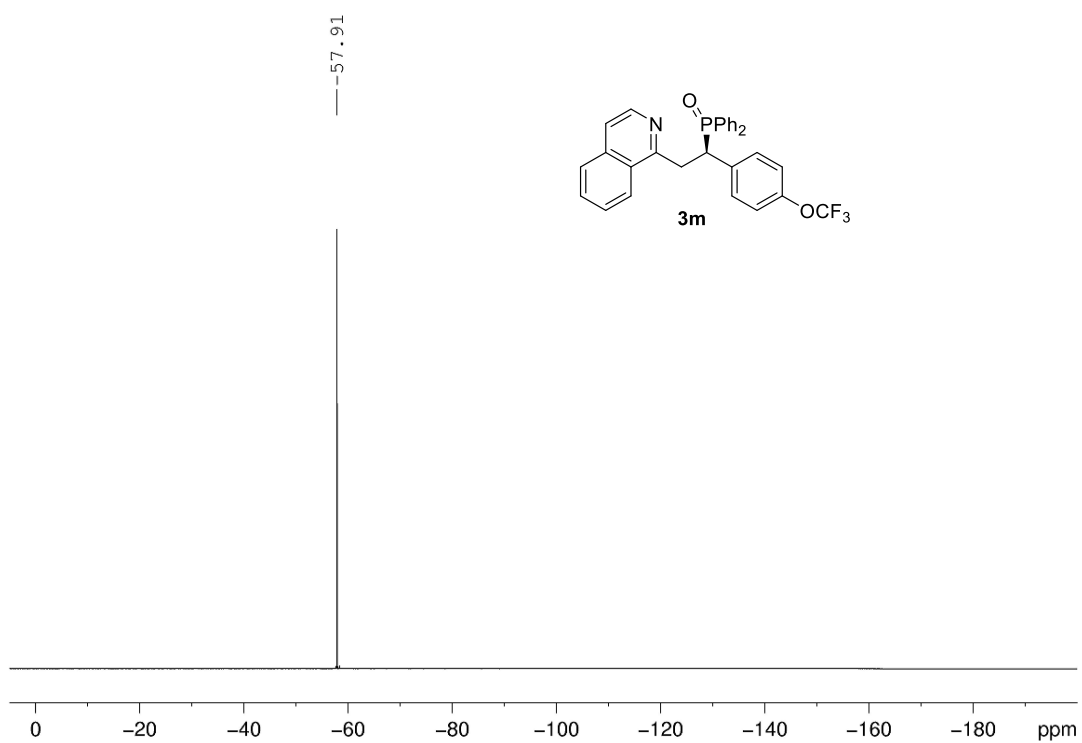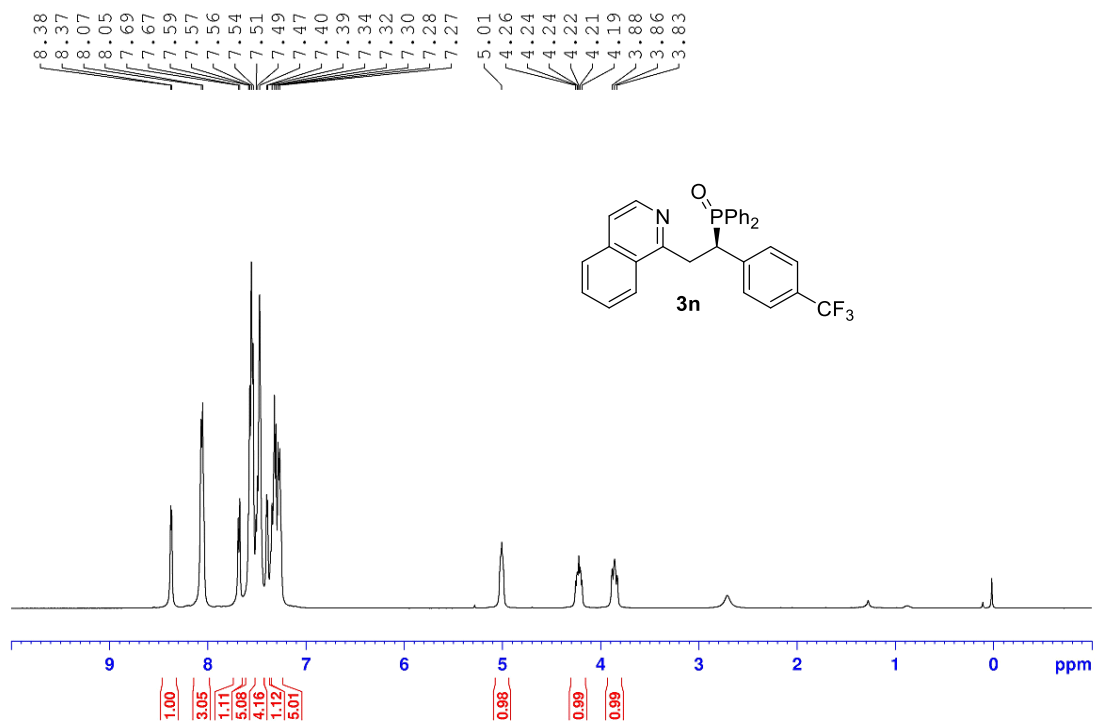

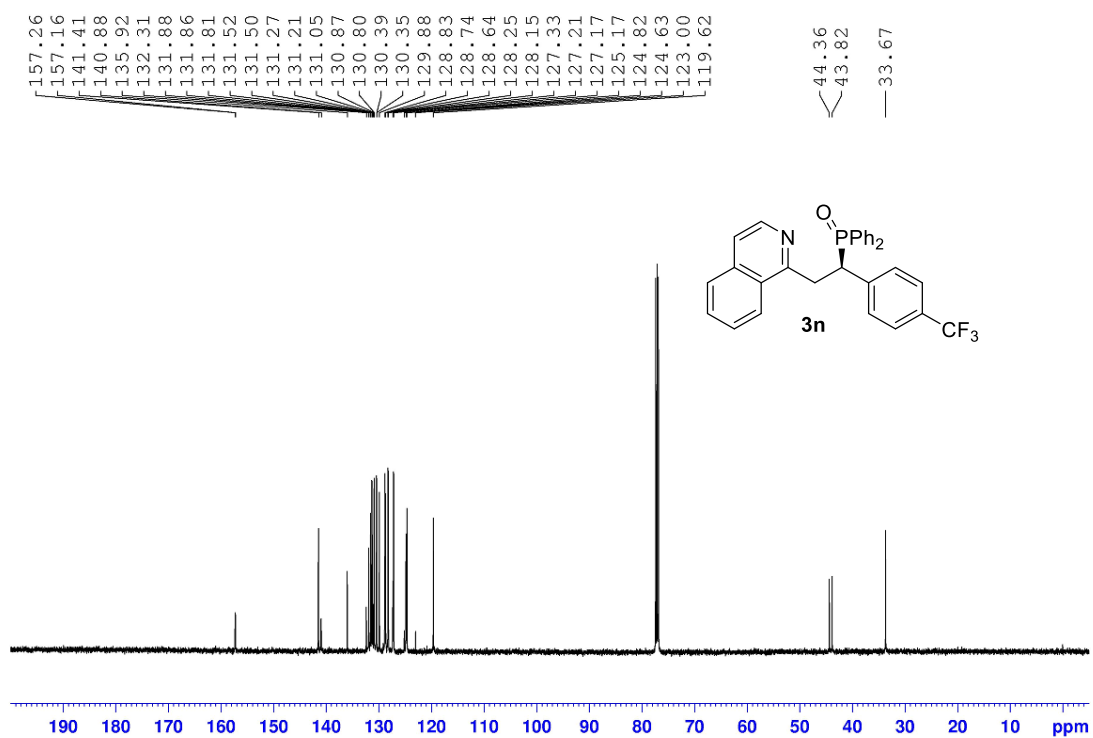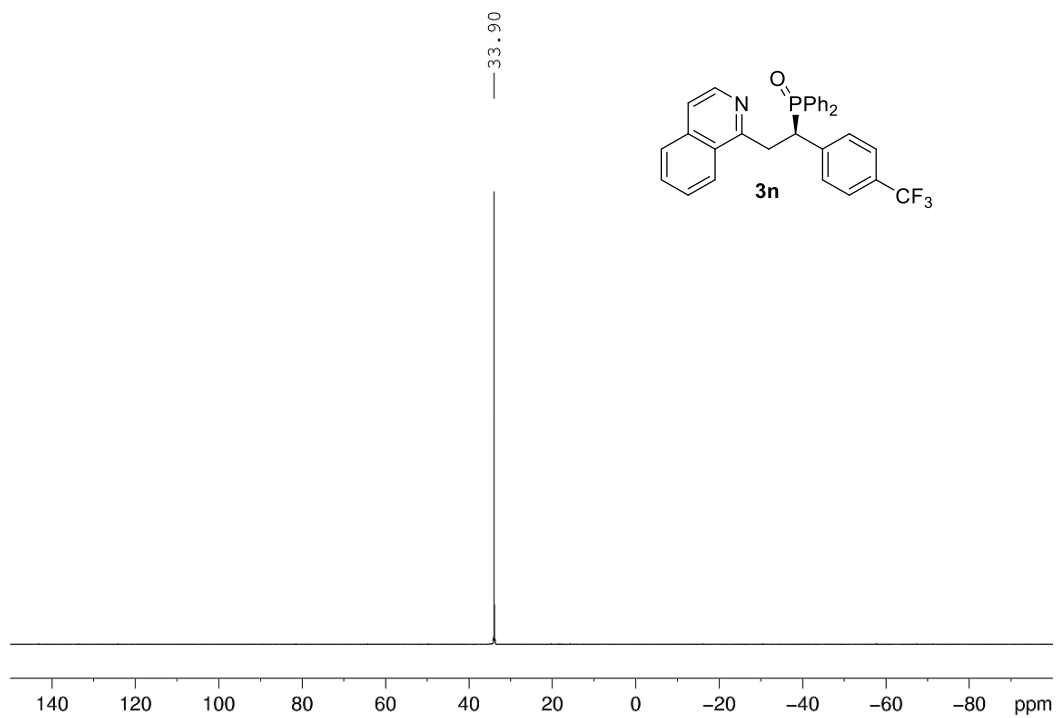



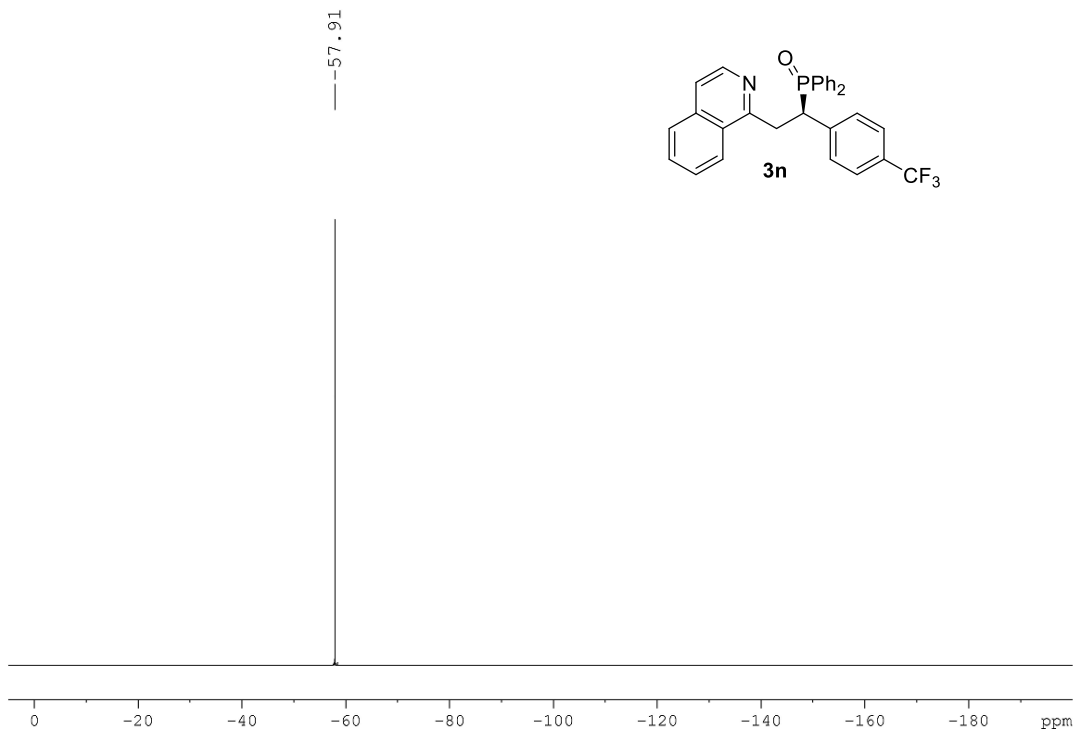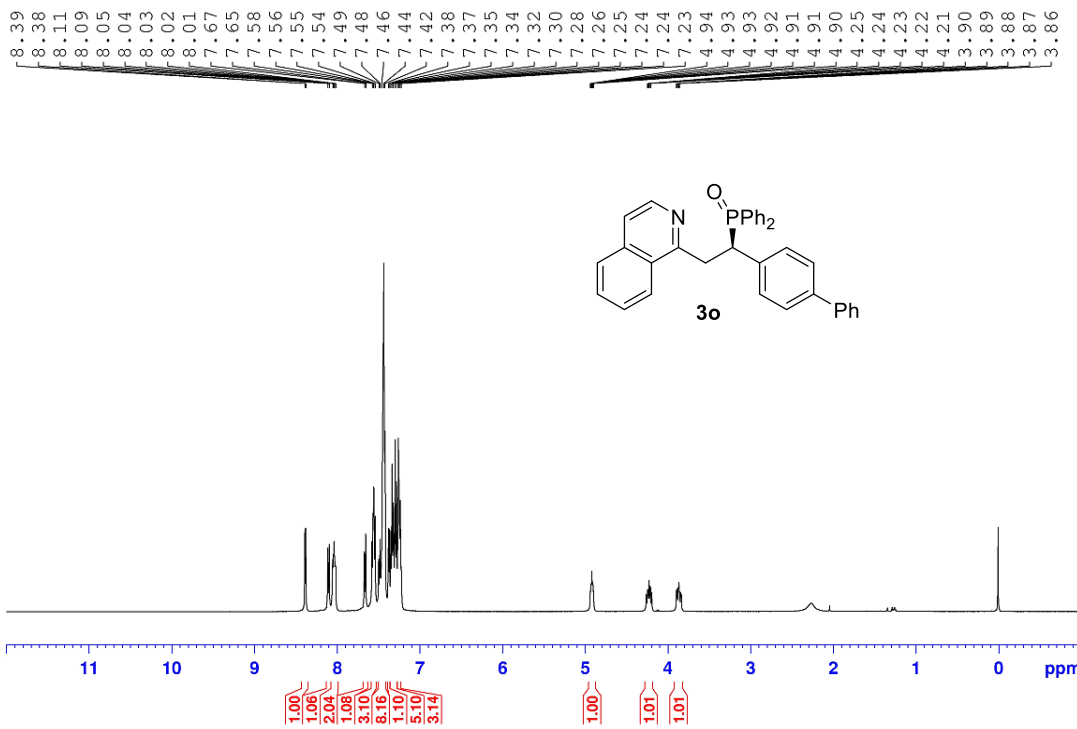

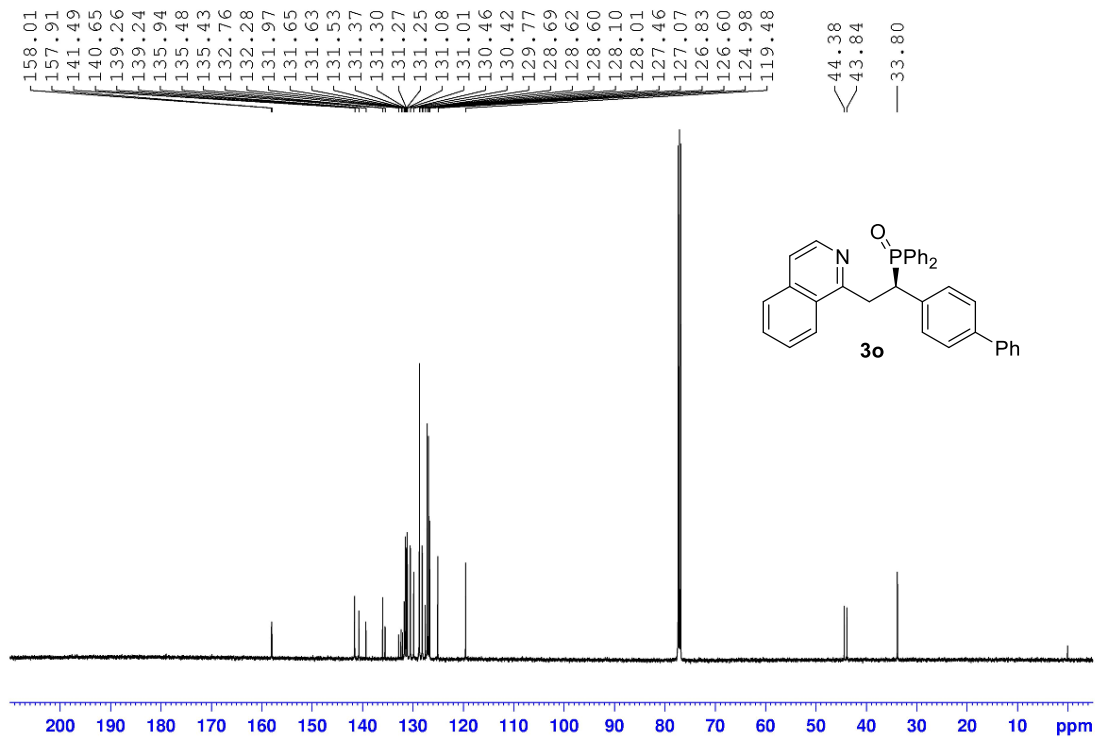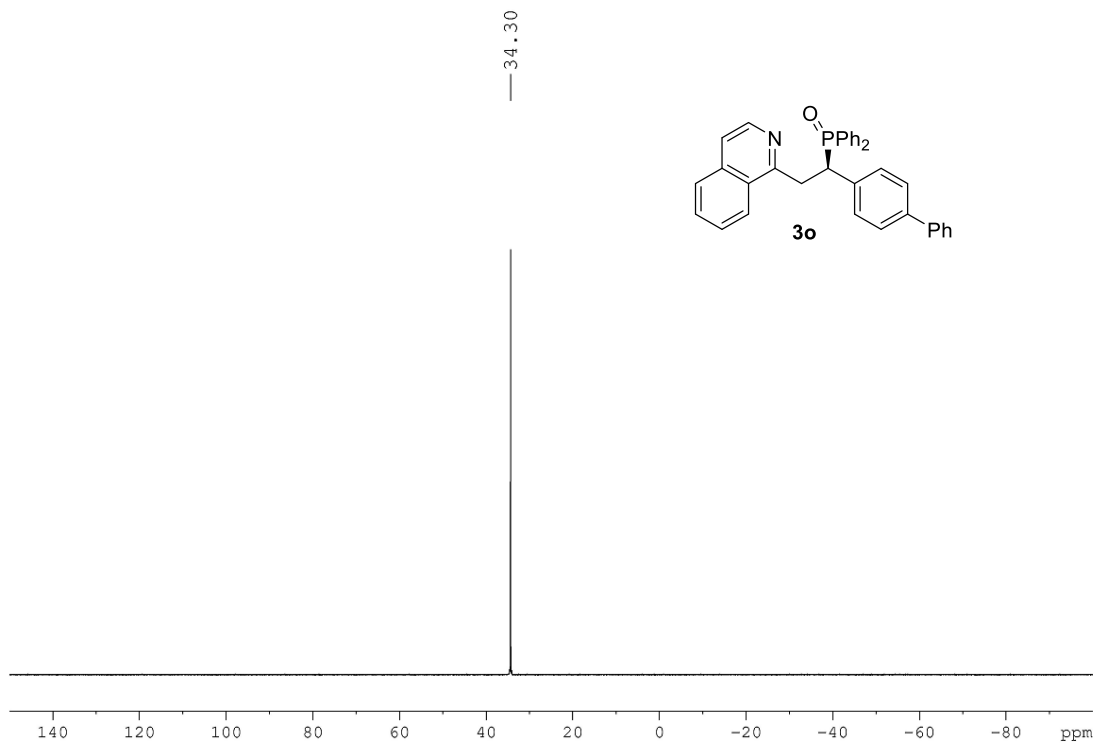

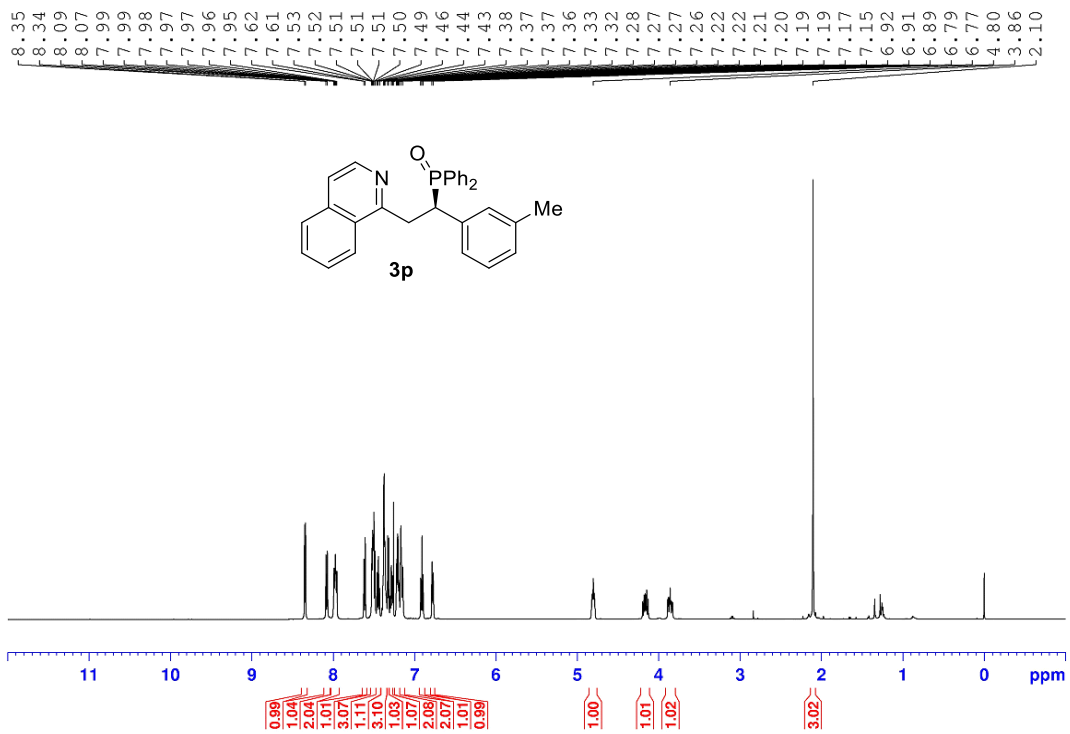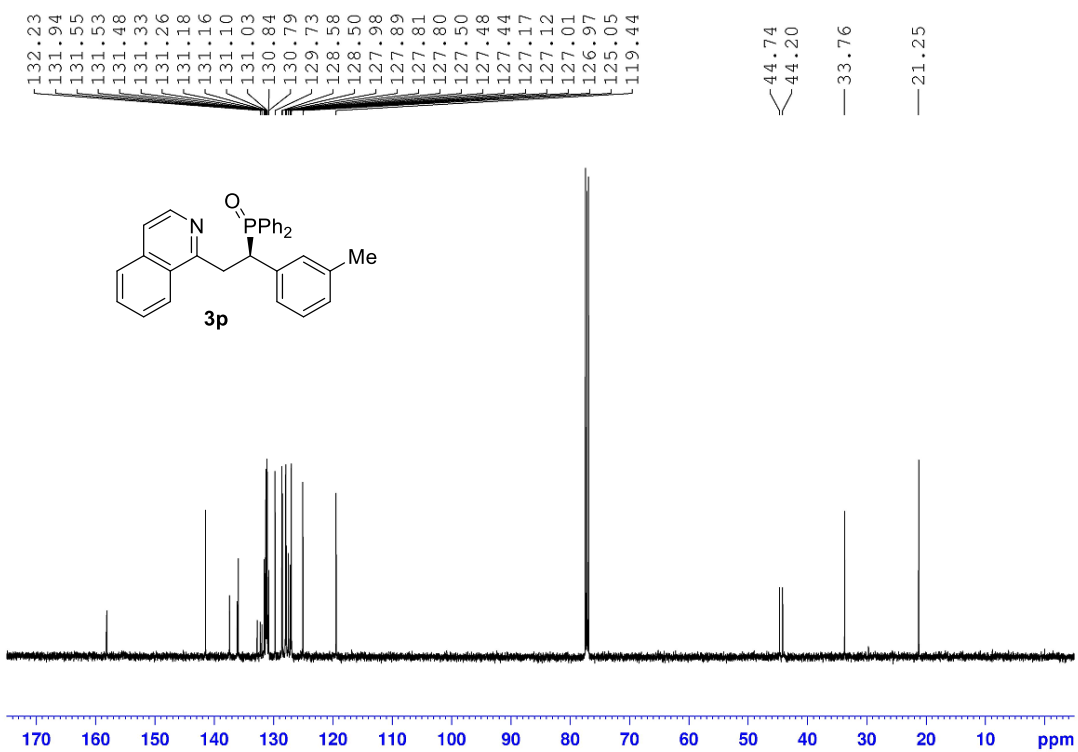

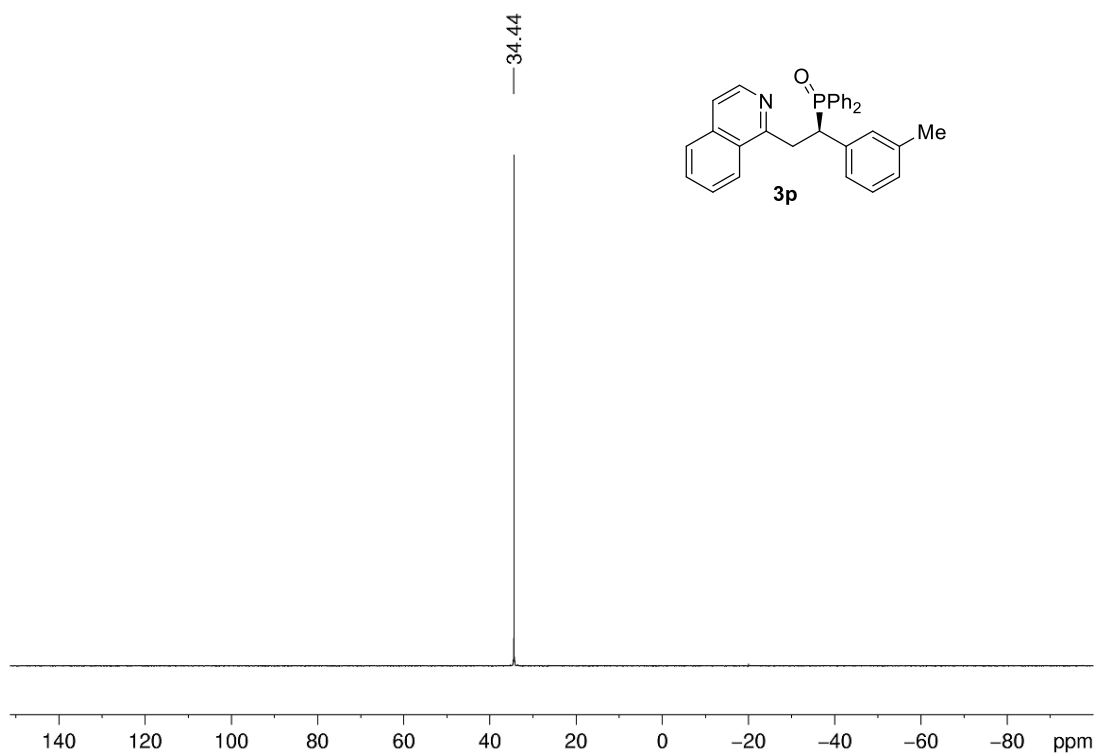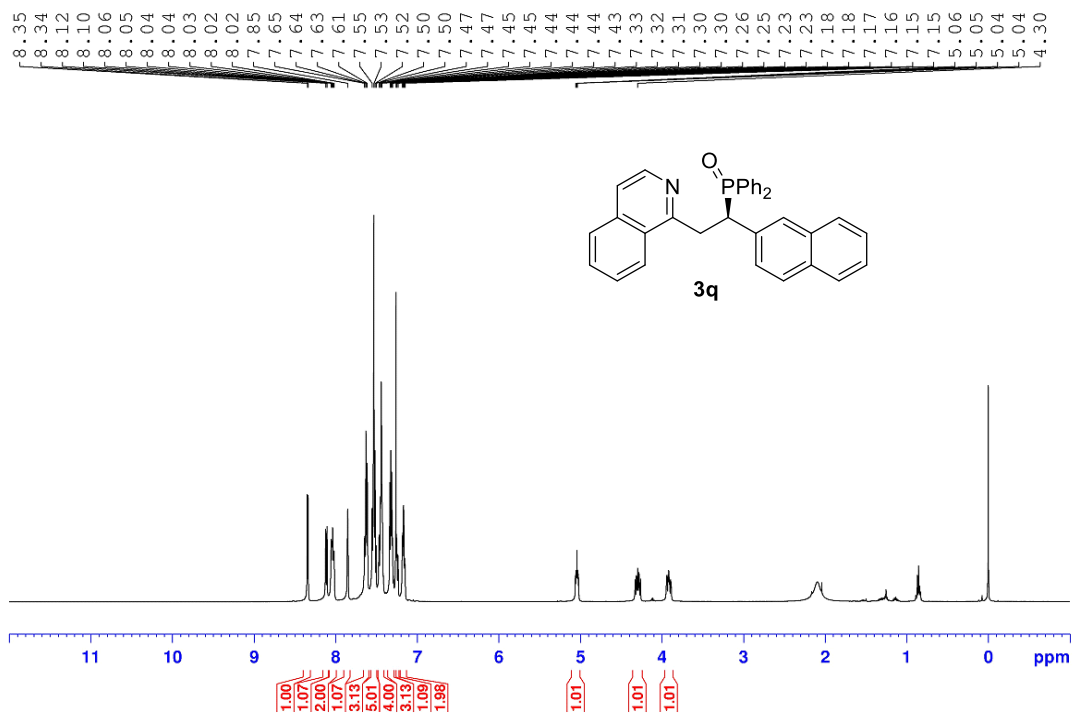

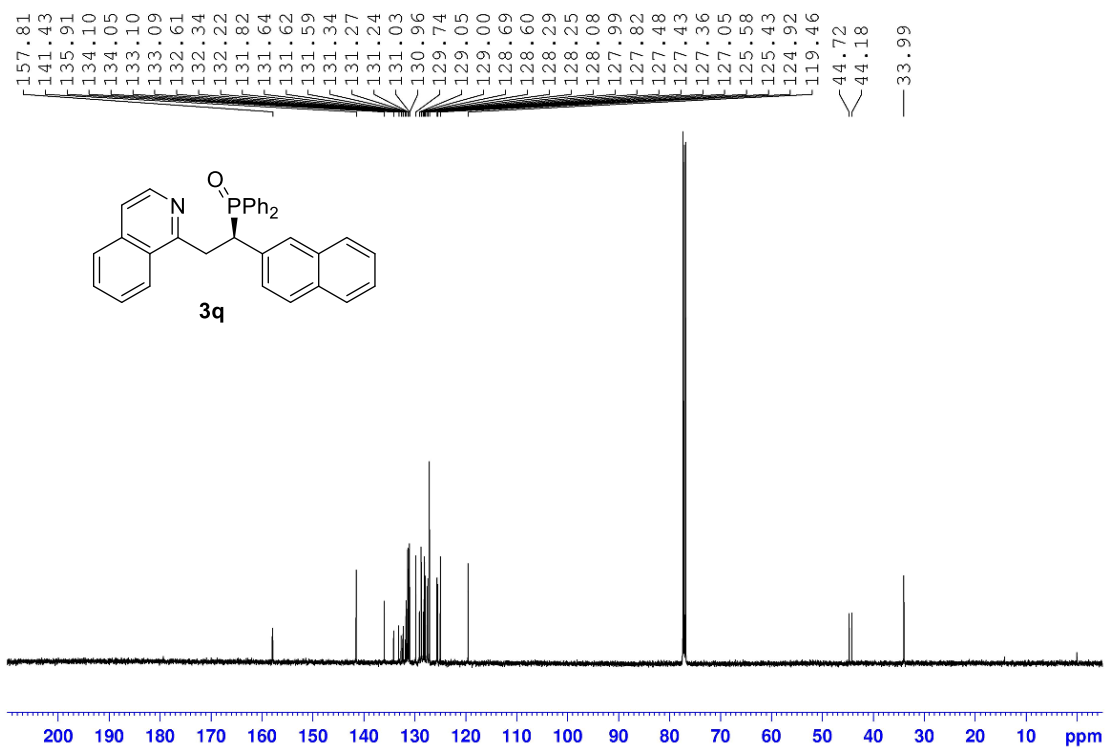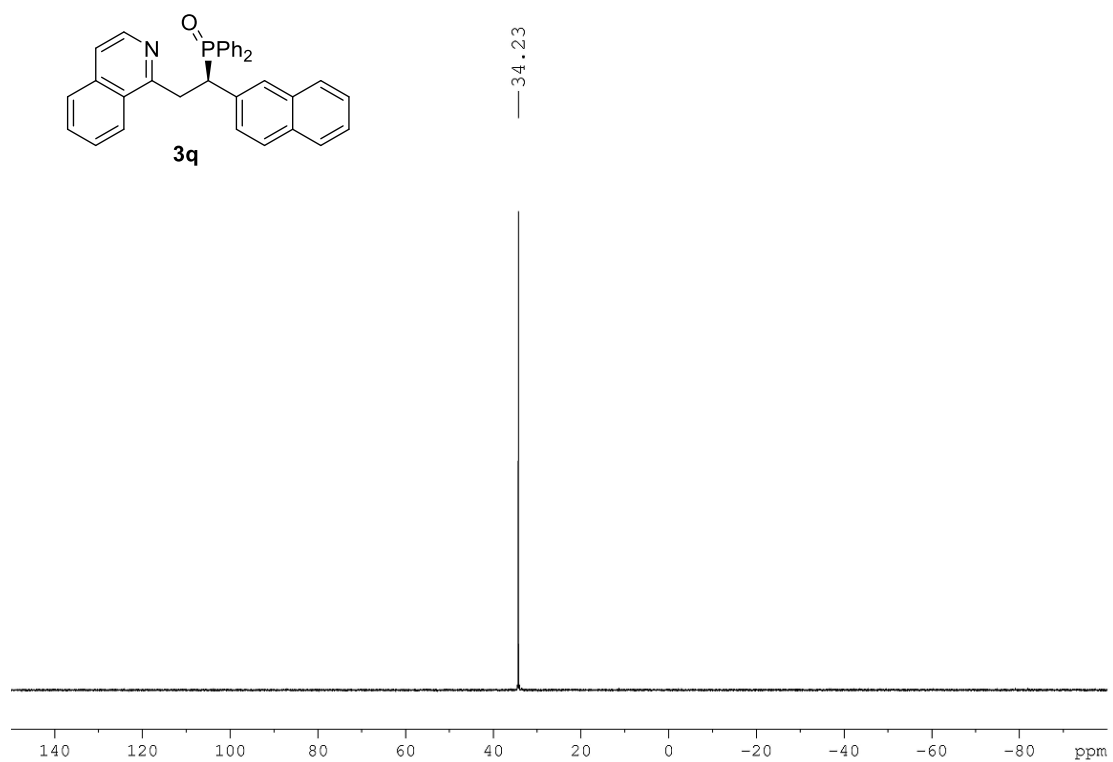

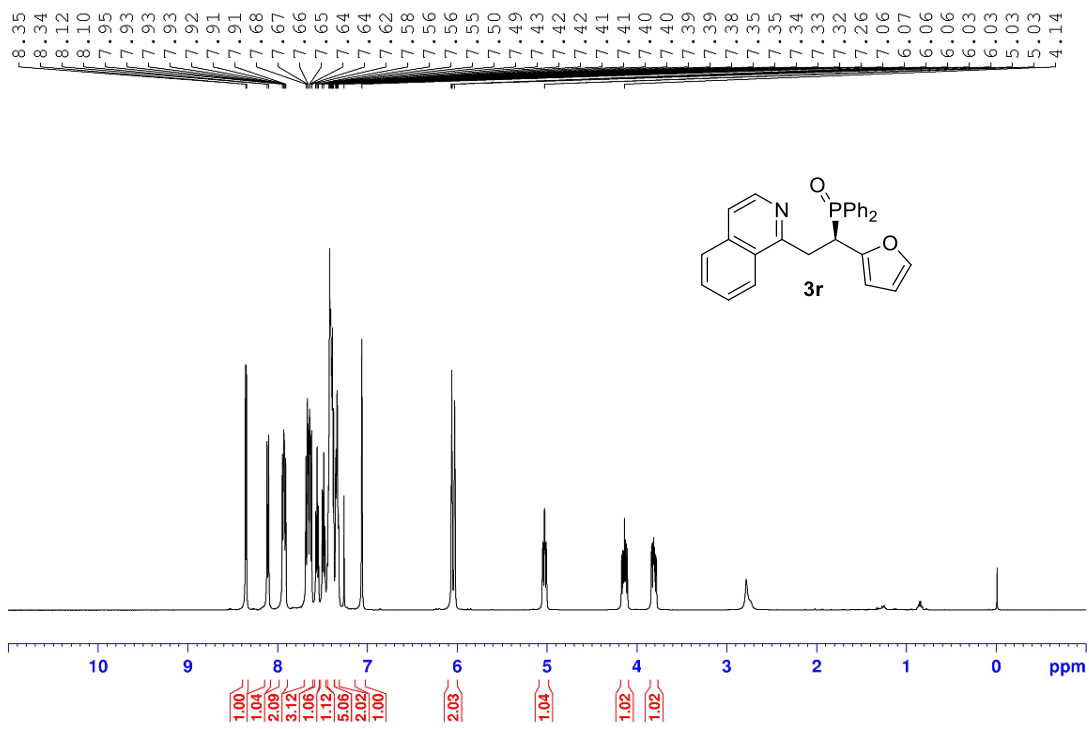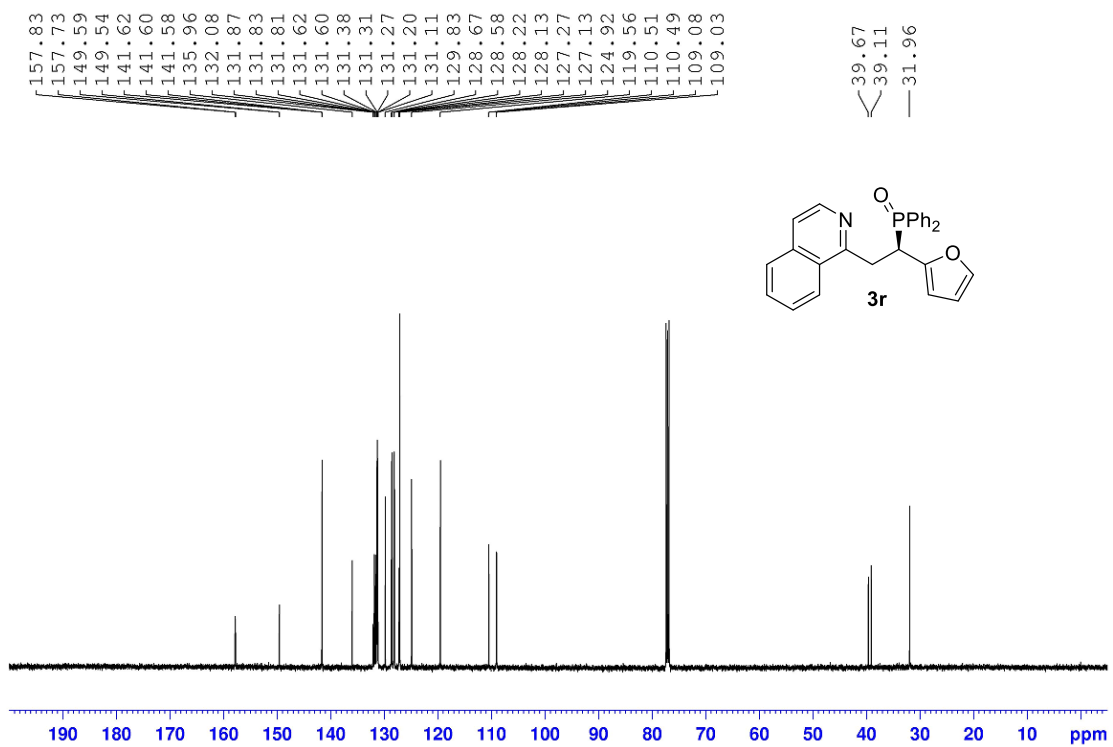

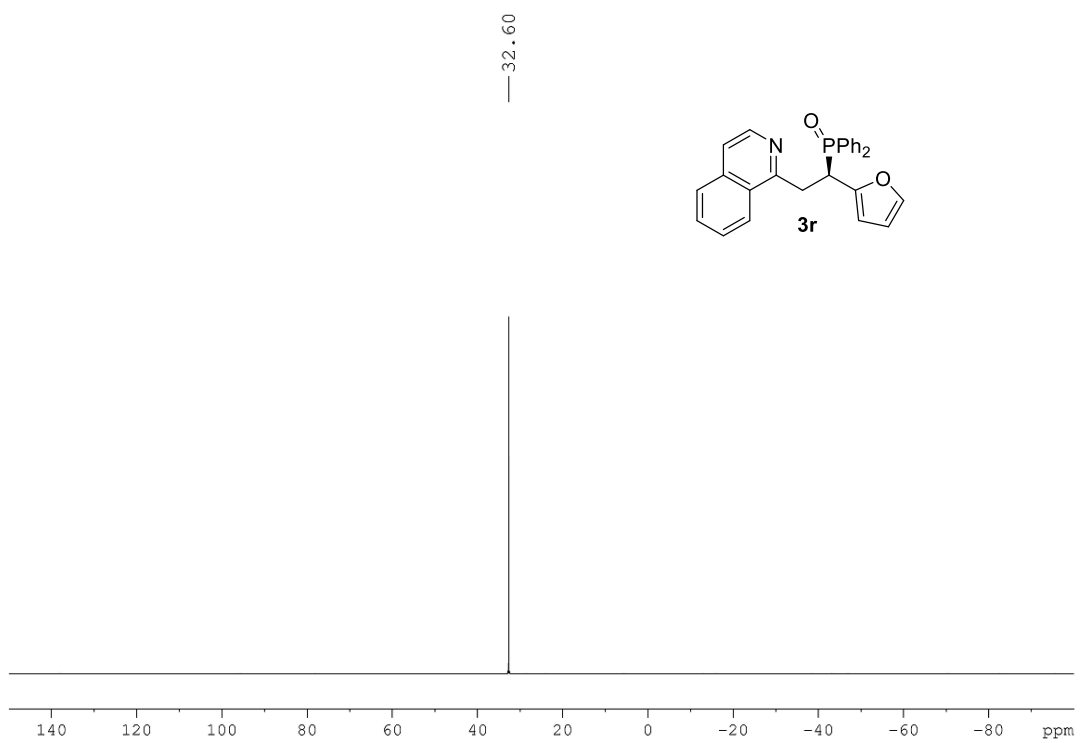

6.29  
6.08  
6.06  
7.99  
7.99  
7.98  
7.98  
7.97  
7.97  
7.96  
7.95  
7.71  
7.69  
7.69  
7.68  
7.68  
7.67  
7.67  
7.58  
7.57  
7.55  
7.50  
7.49  
7.47  
7.43  
7.41  
7.40  
7.38  
7.35  
7.35  
7.34  
7.34  
7.32  
7.26  
7.17  
7.06  
6.37  
4.81  
4.80  
4.80  
4.79  
4.78  
4.78  
4.77  
4.01  
4.01  
4.00  
3.98  
3.98  
3.96  
3.70  
3.69  
3.68  
3.67

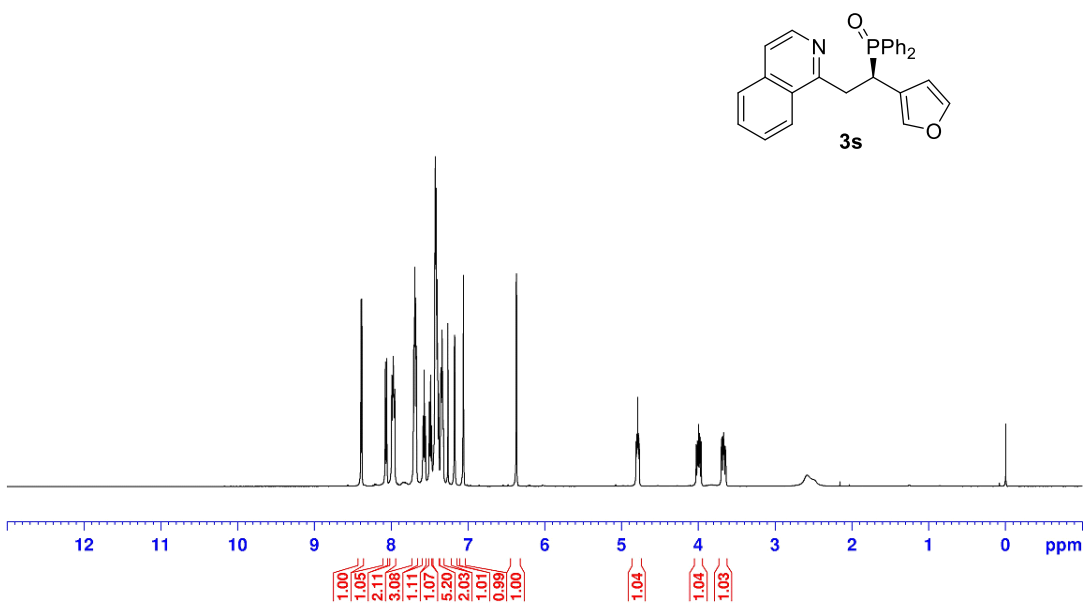

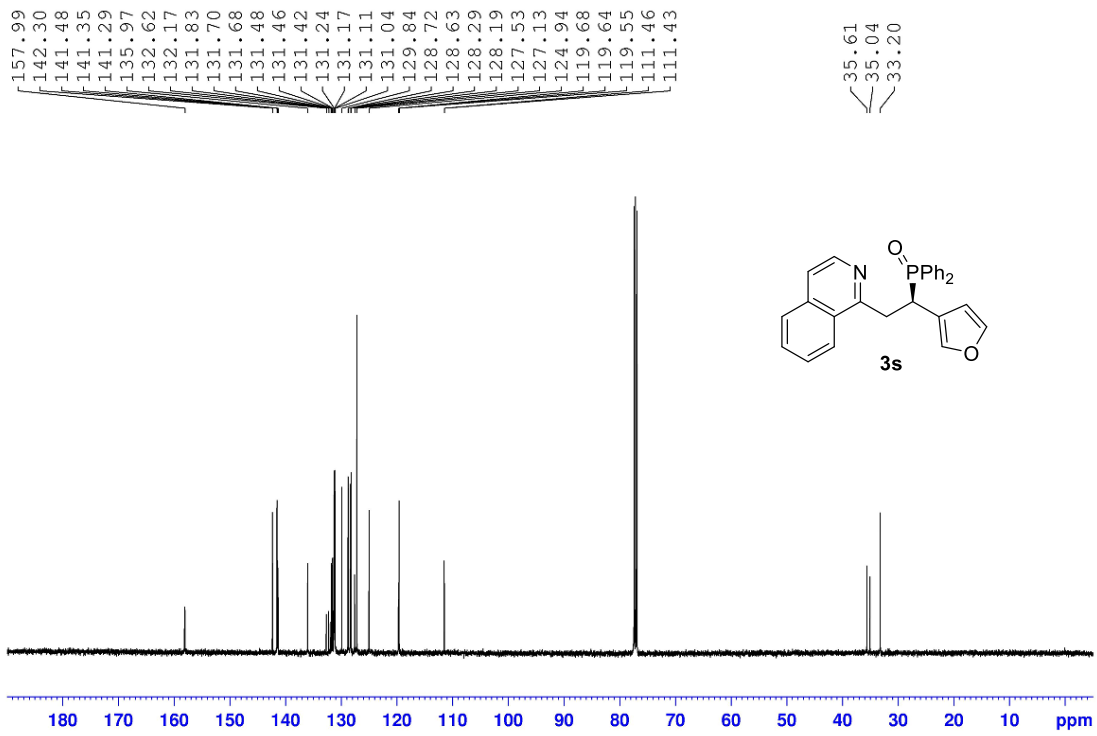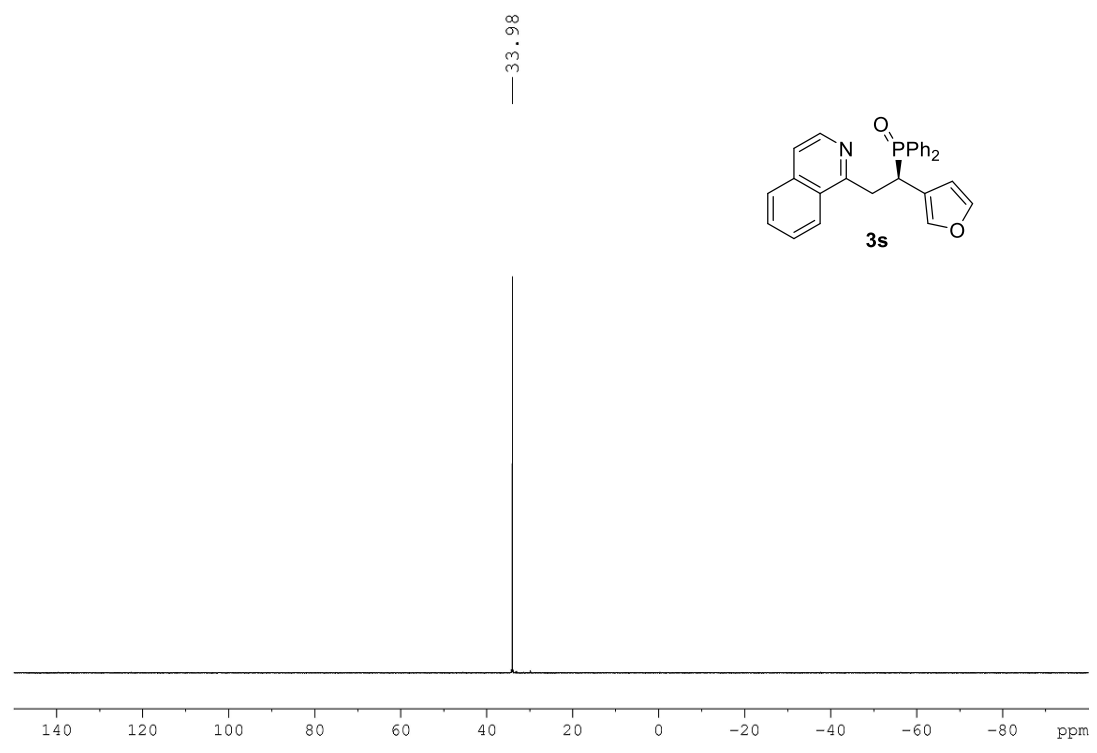



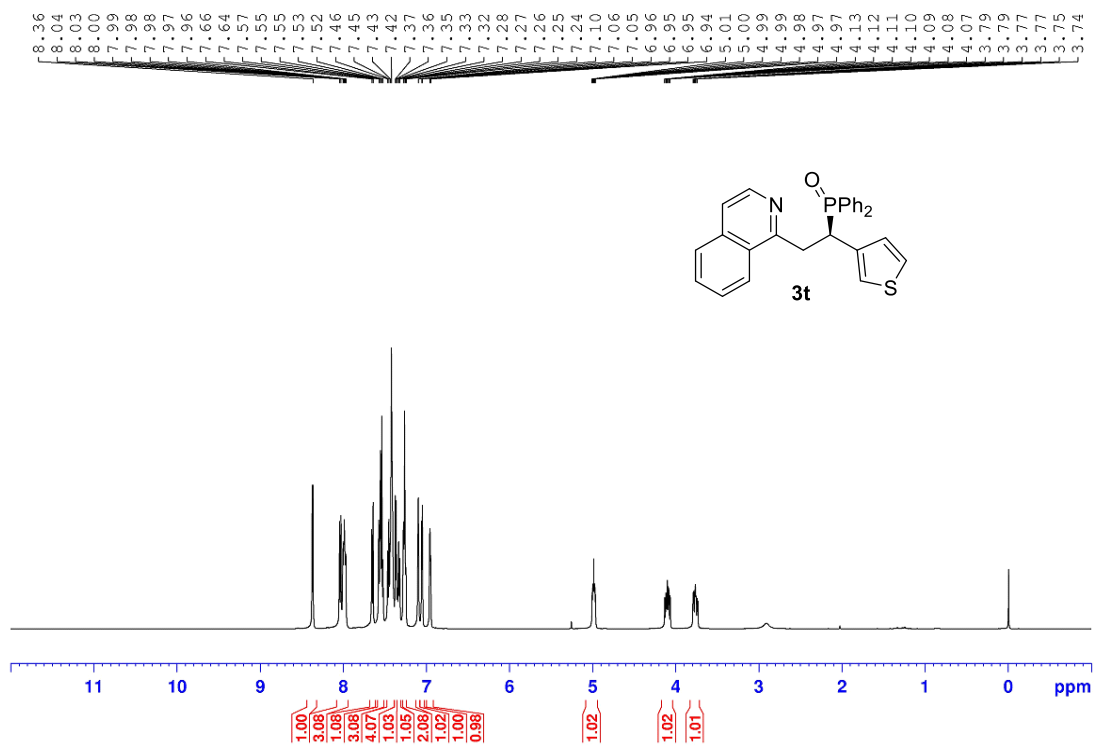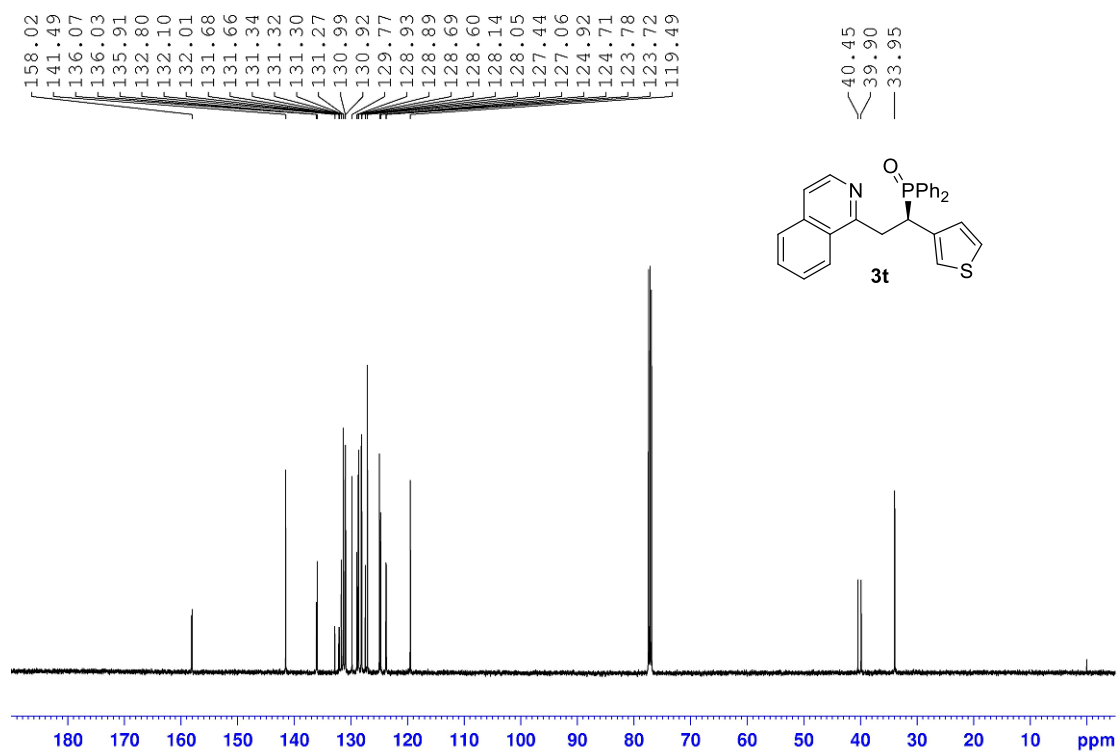

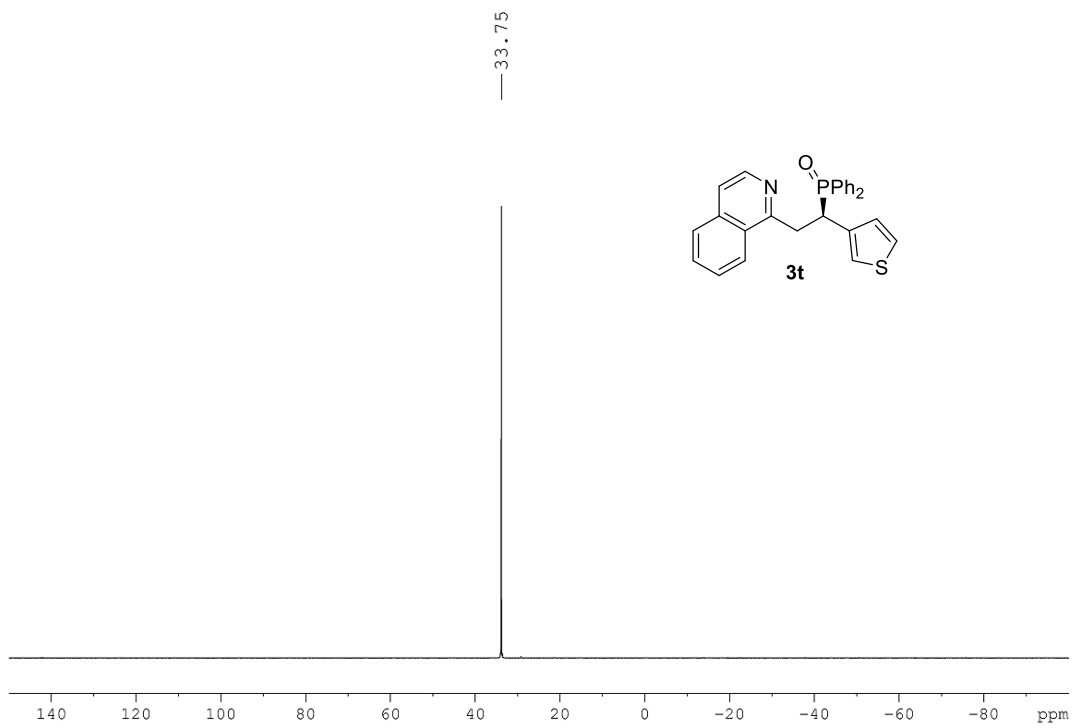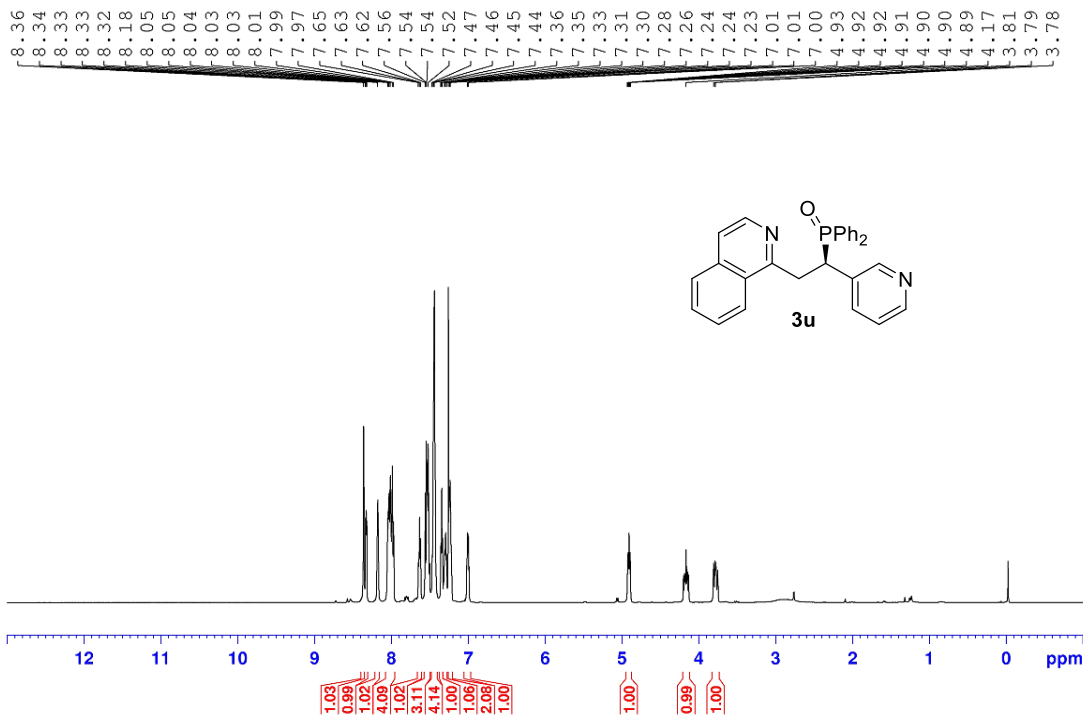

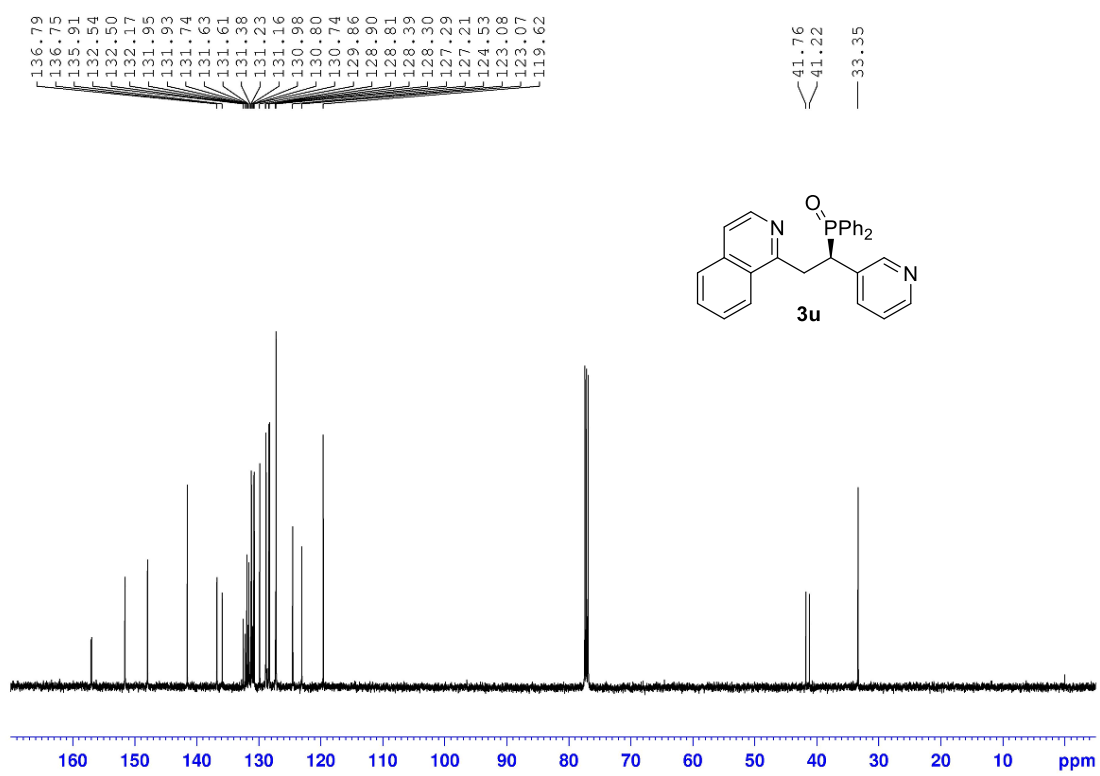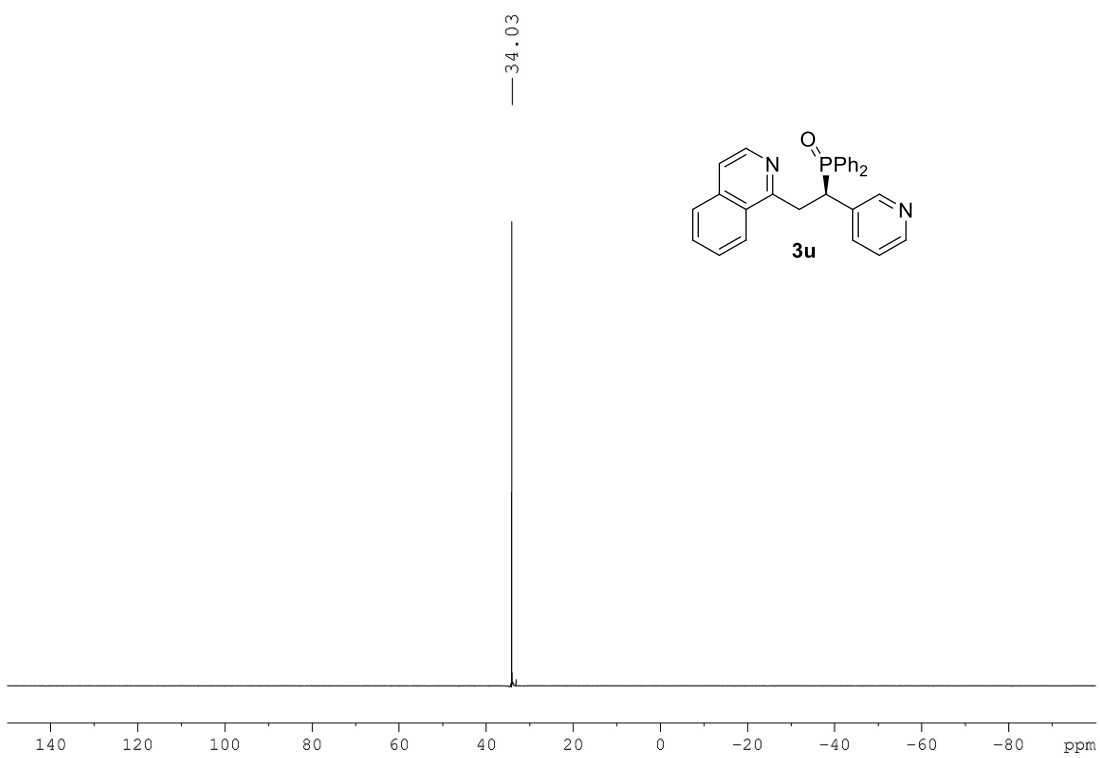

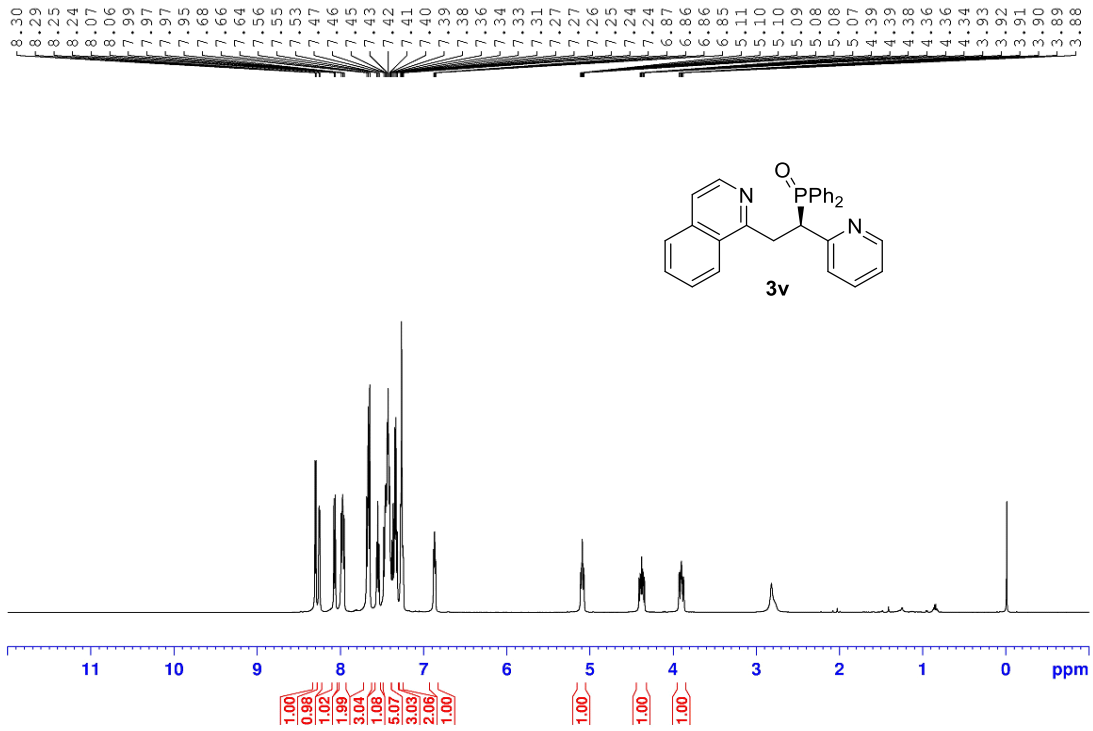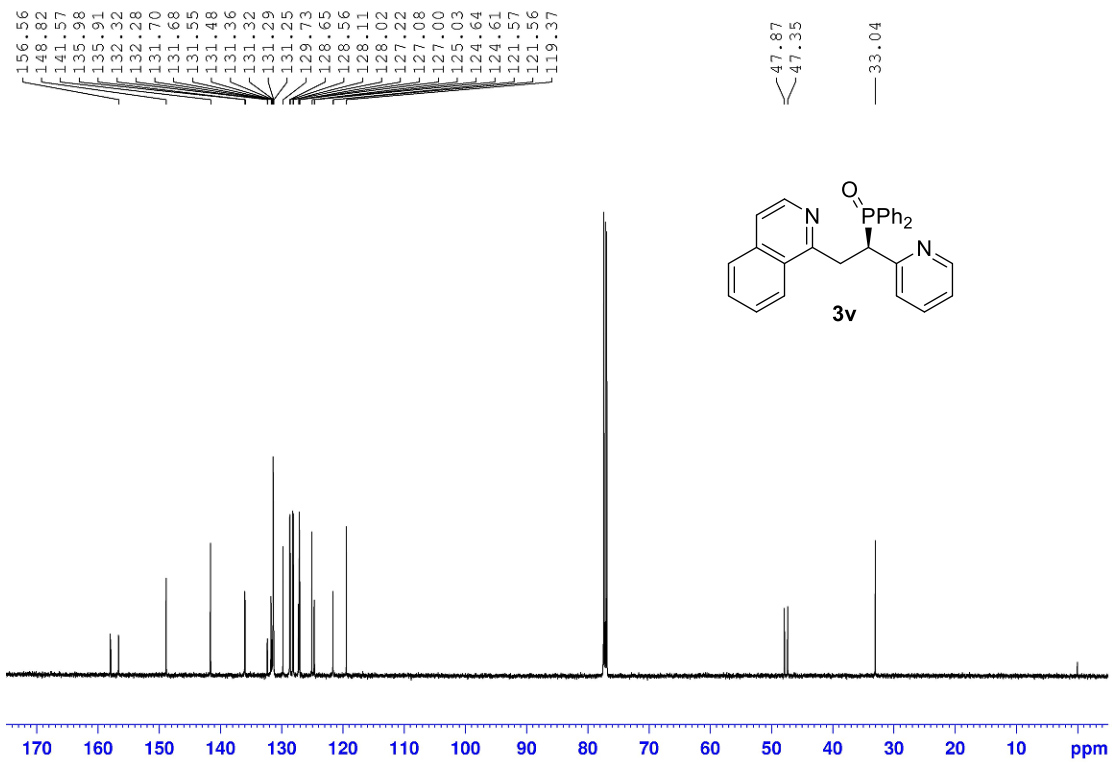

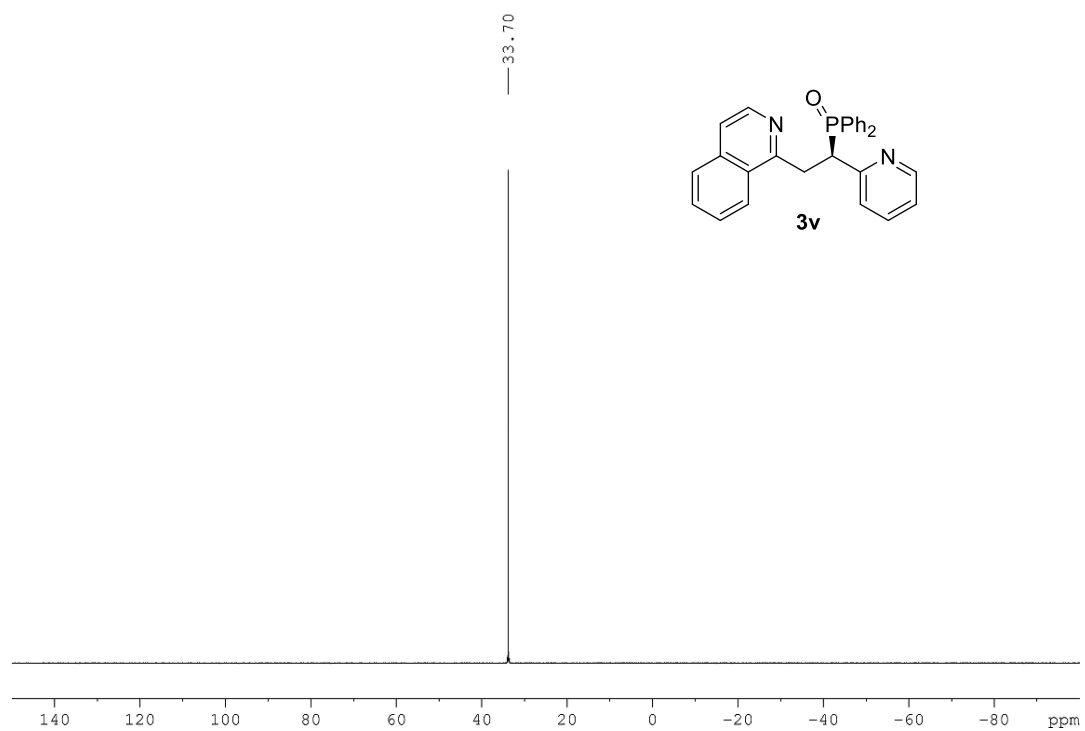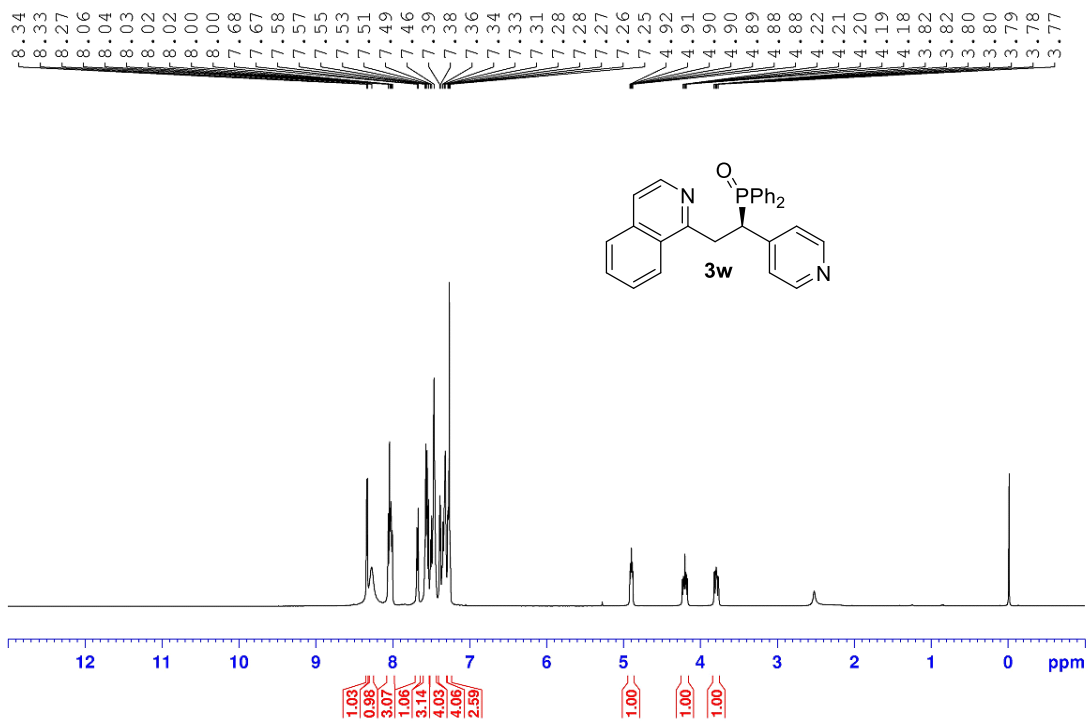

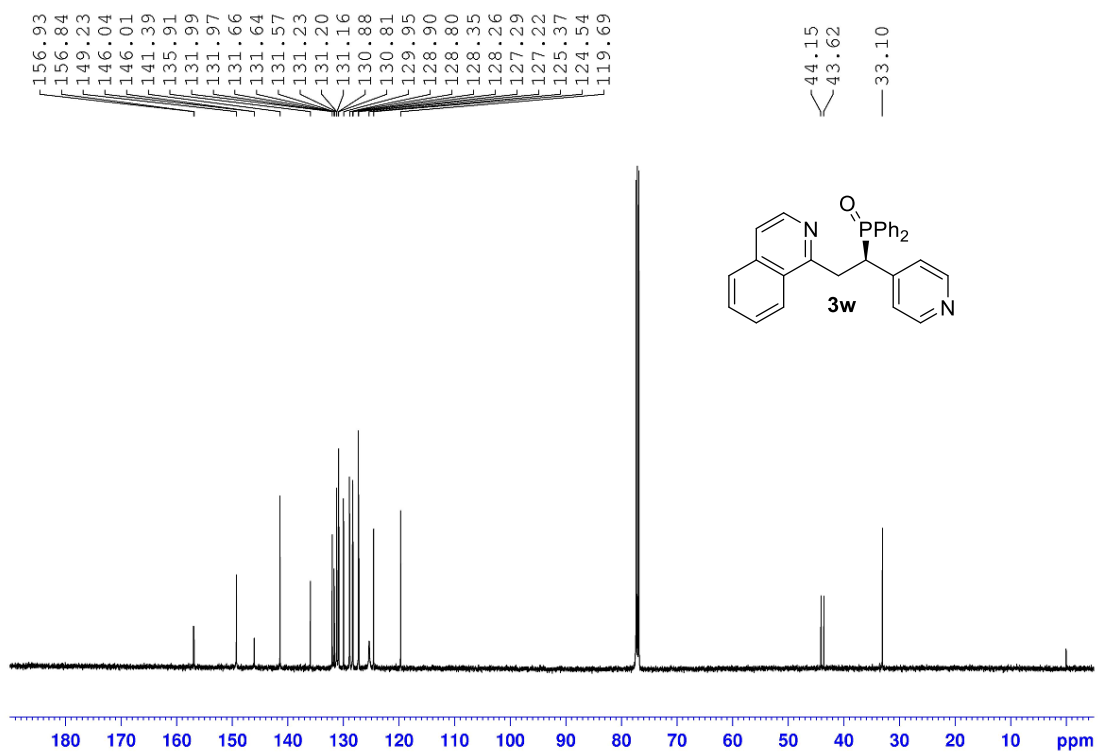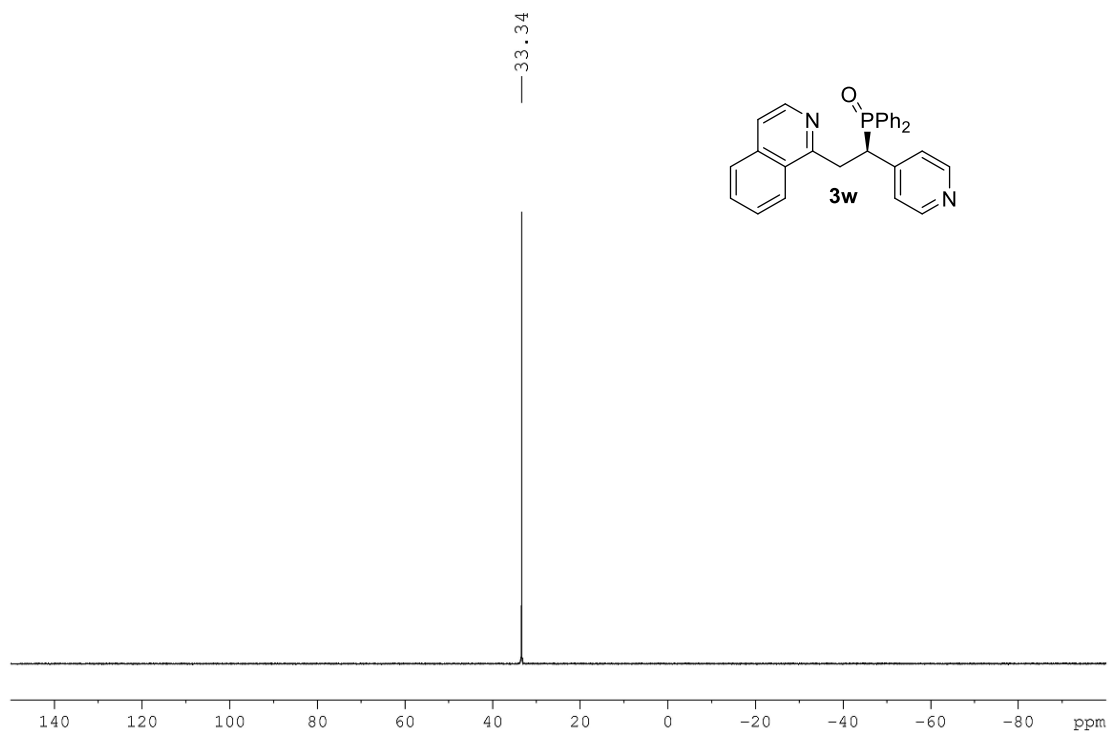

8.31  
8.30  
8.28  
8.26  
7.67  
7.66  
7.66  
7.65  
7.63  
7.54  
7.53  
7.53  
7.51  
7.51  
7.50  
7.49  
7.48  
7.48  
7.47  
7.47  
7.47  
7.46  
7.46  
7.39  
7.38  
7.36  
7.36  
7.35  
7.34  
7.32  
7.32  
7.31  
7.30  
7.29  
7.29  
7.26  
7.17  
7.17  
7.16  
7.15  
7.11  
7.10  
7.09  
7.08  
7.06  
6.99  
3.15

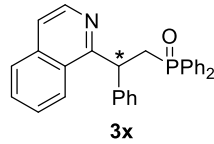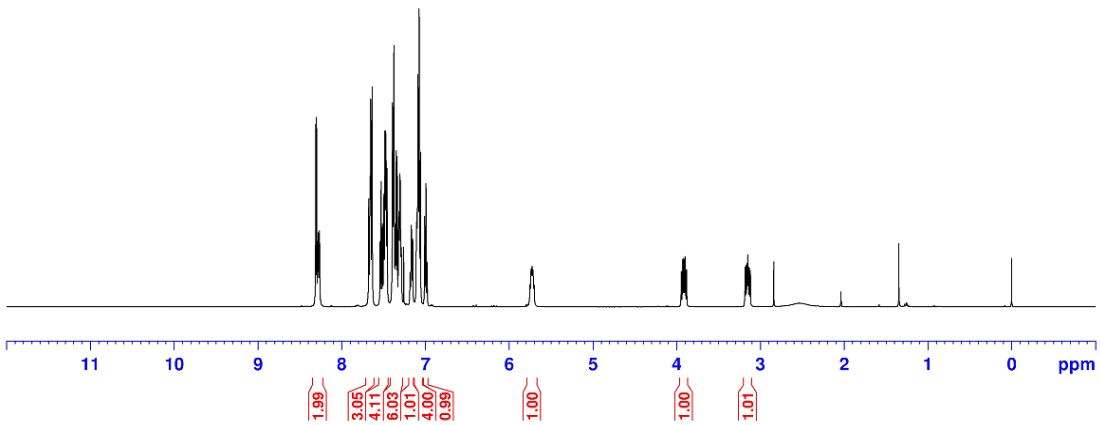

143.12  
141.13  
136.31  
133.73  
133.53  
132.94  
132.75  
131.28  
131.26  
130.93  
130.91  
130.69  
130.61  
130.53  
129.69  
128.47  
128.38  
128.29  
128.17  
127.92  
127.83  
127.23  
127.12  
126.66  
126.62  
125.09  
119.87

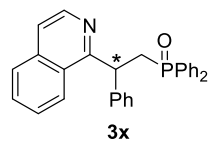

41.34  
41.33  
36.52  
35.96

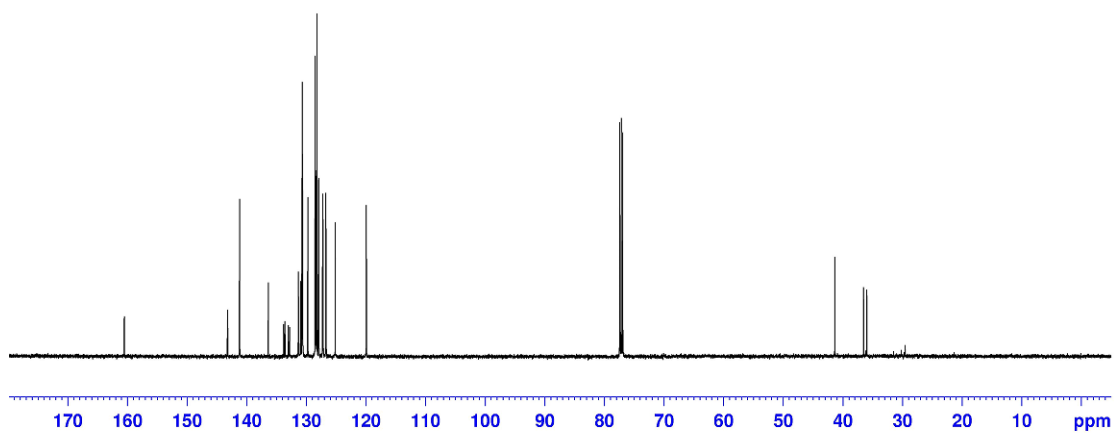

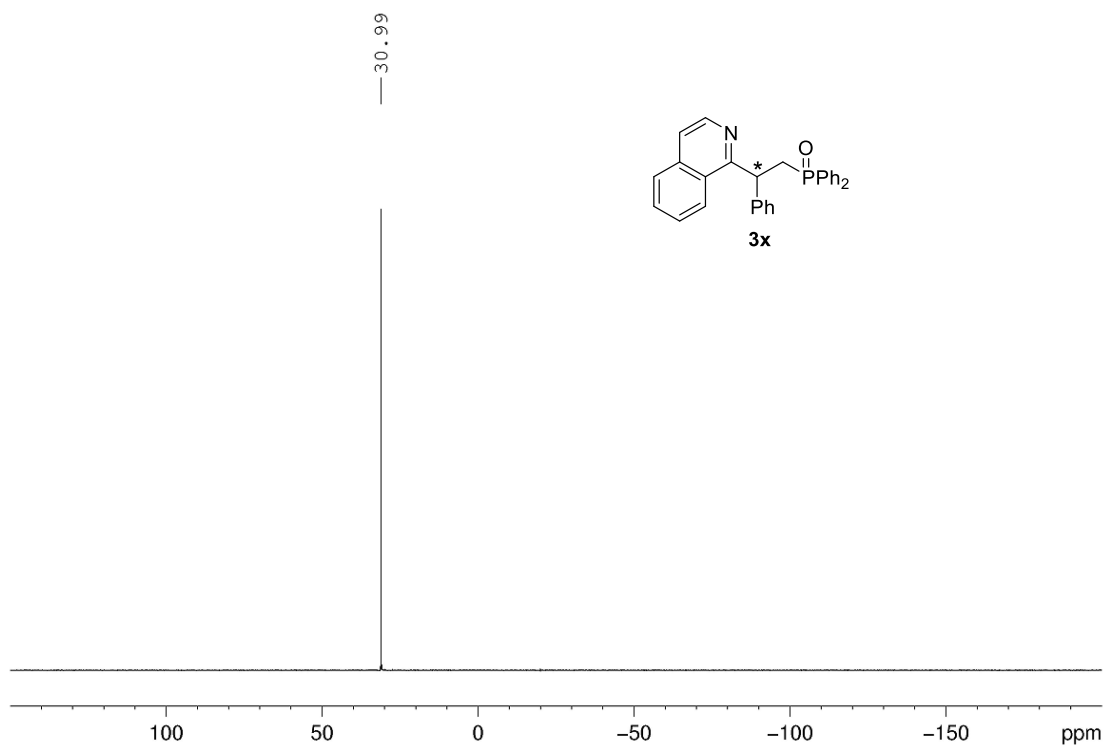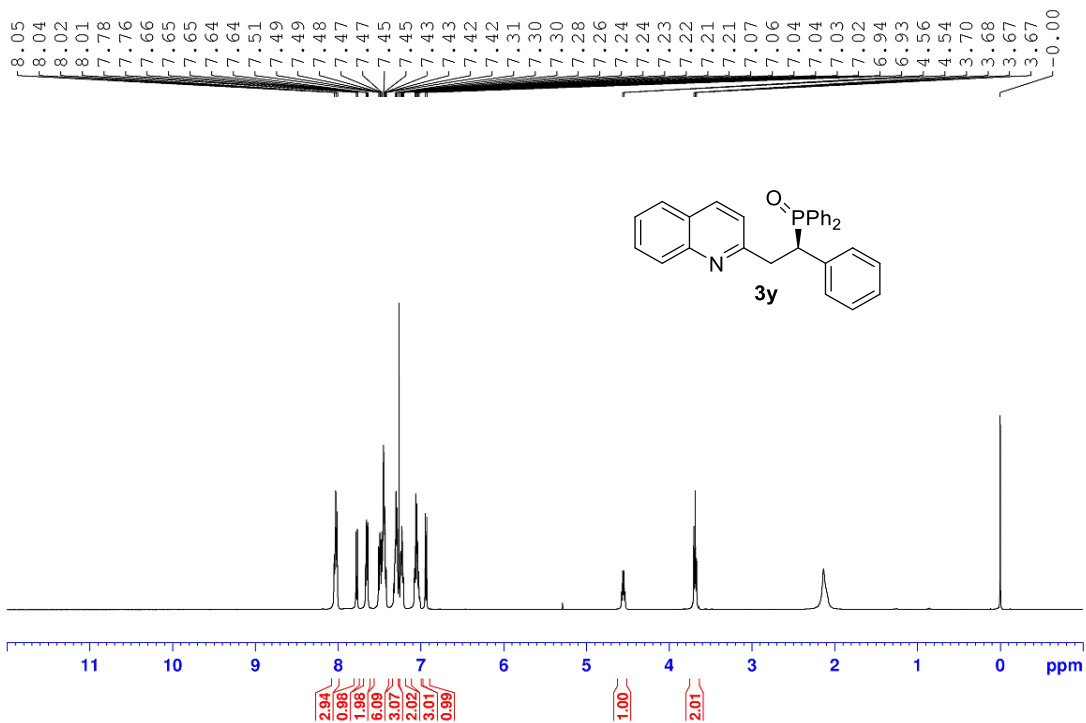



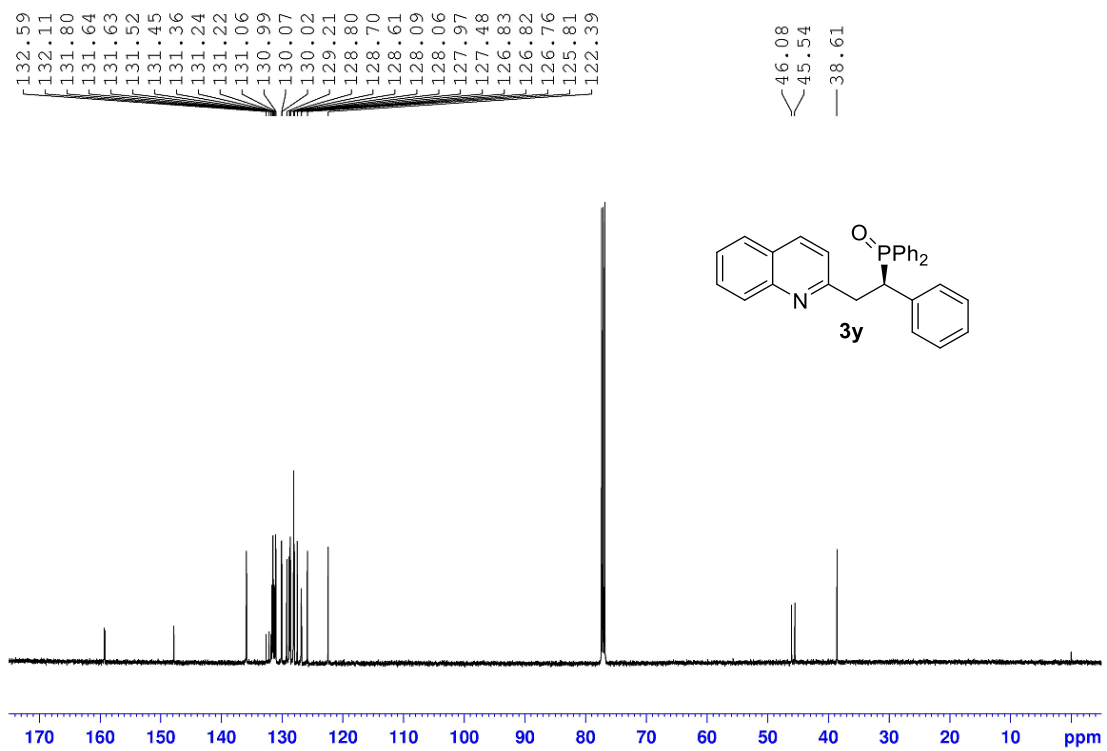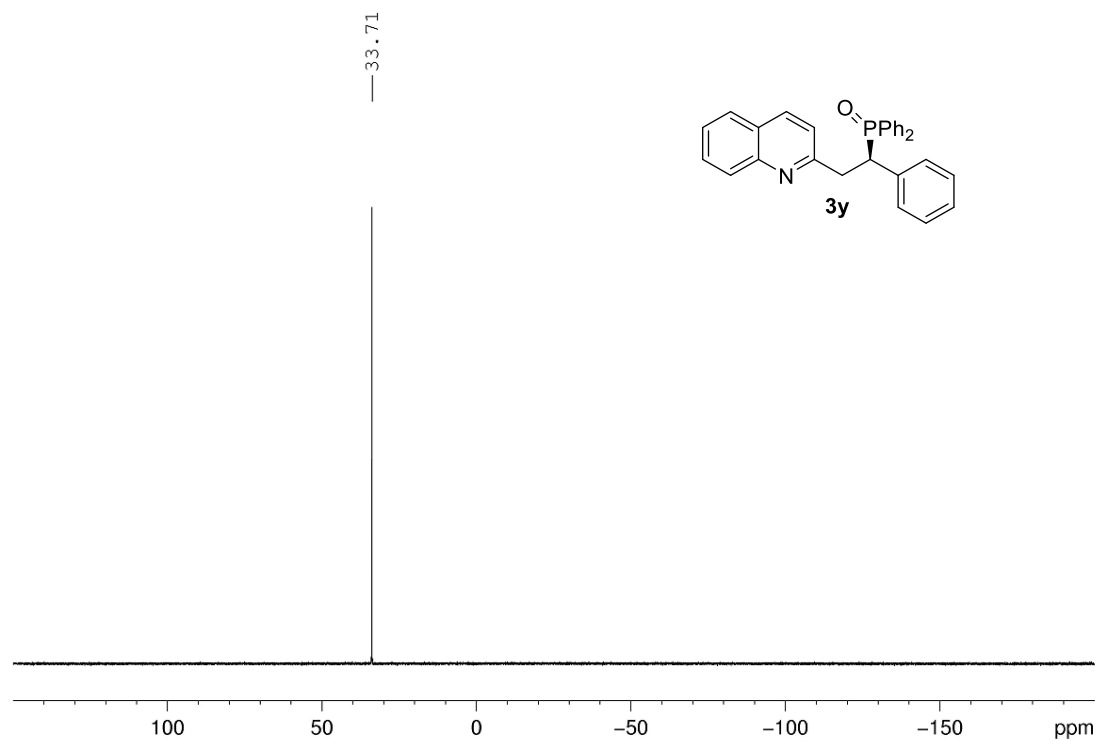

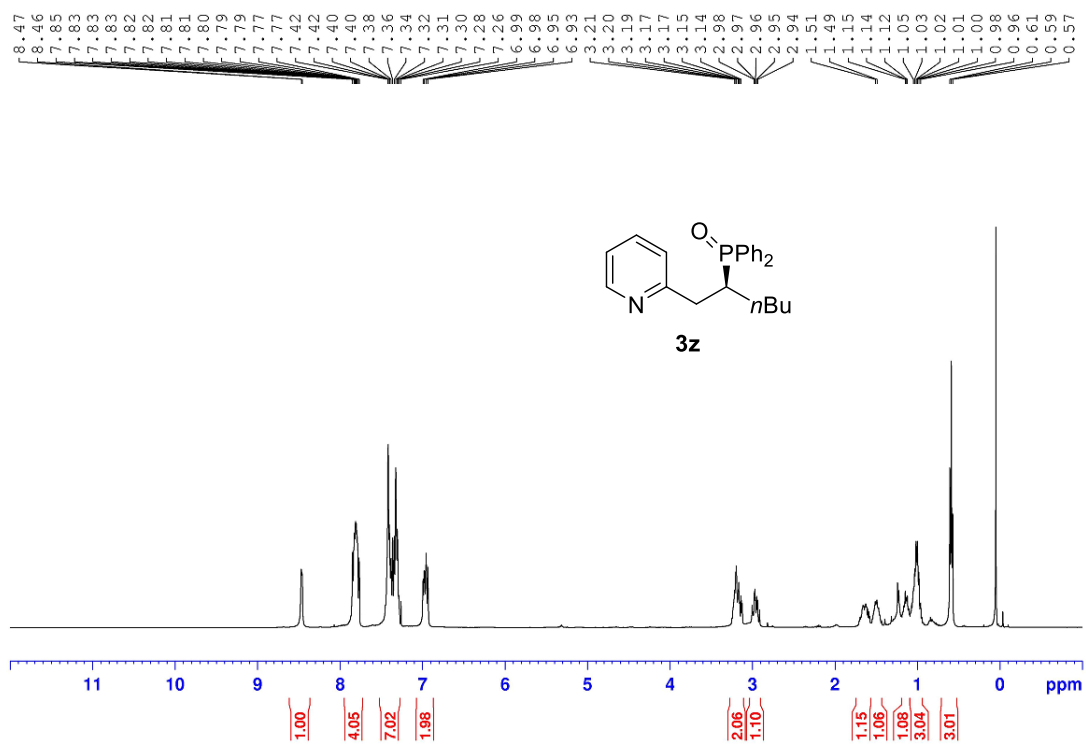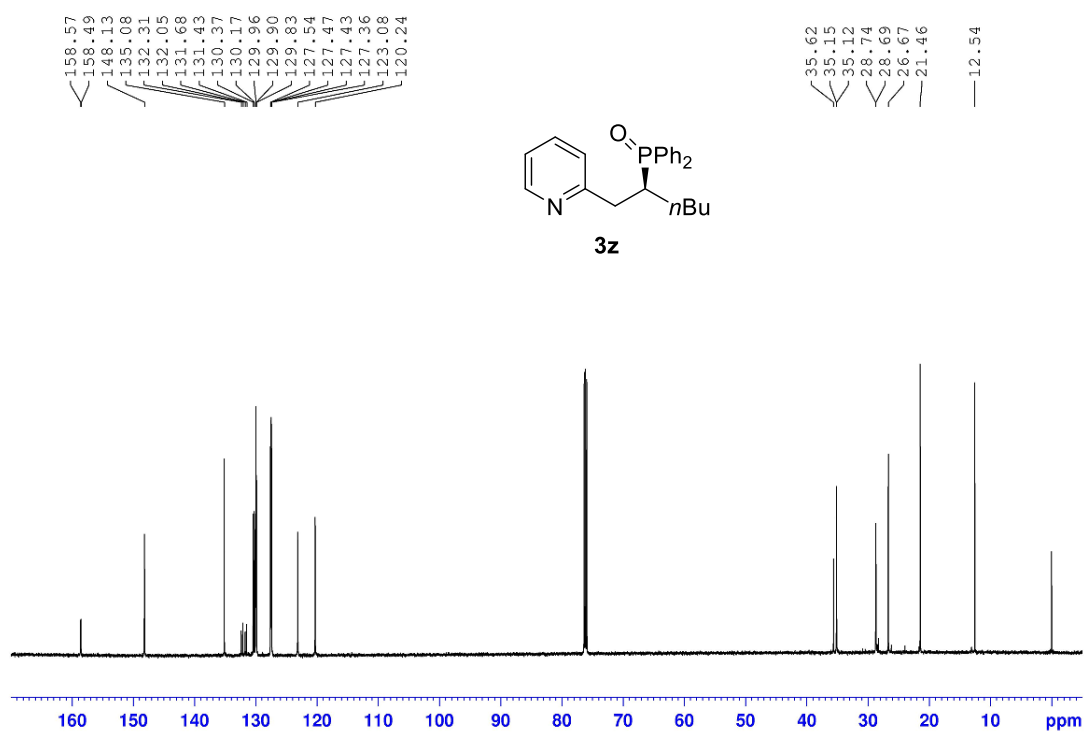

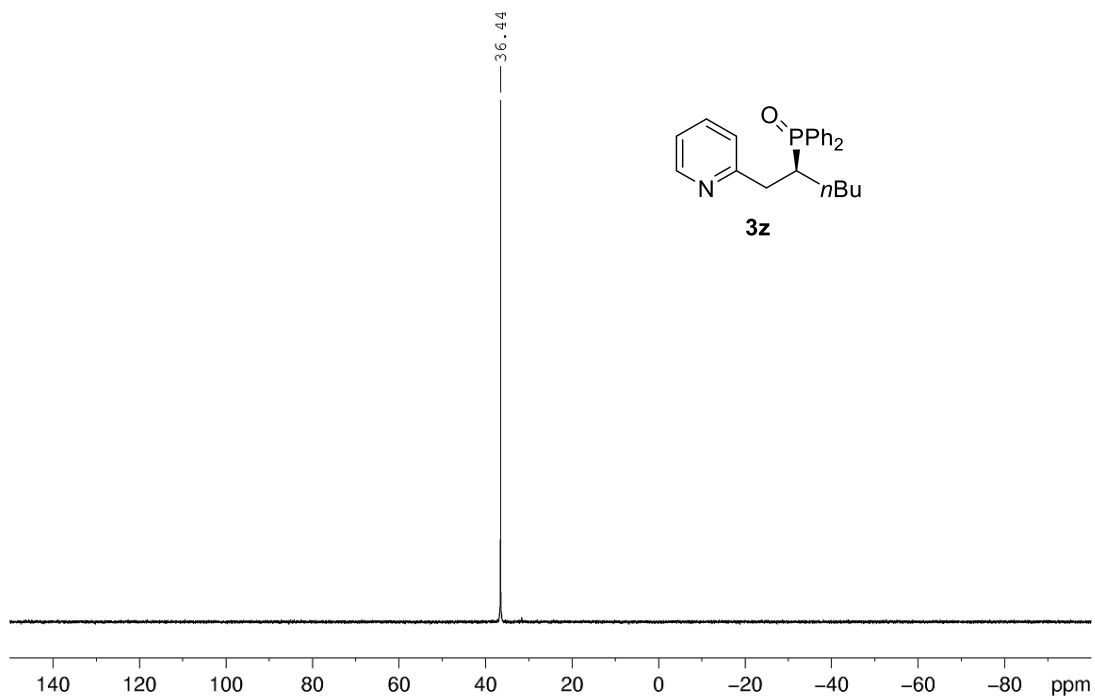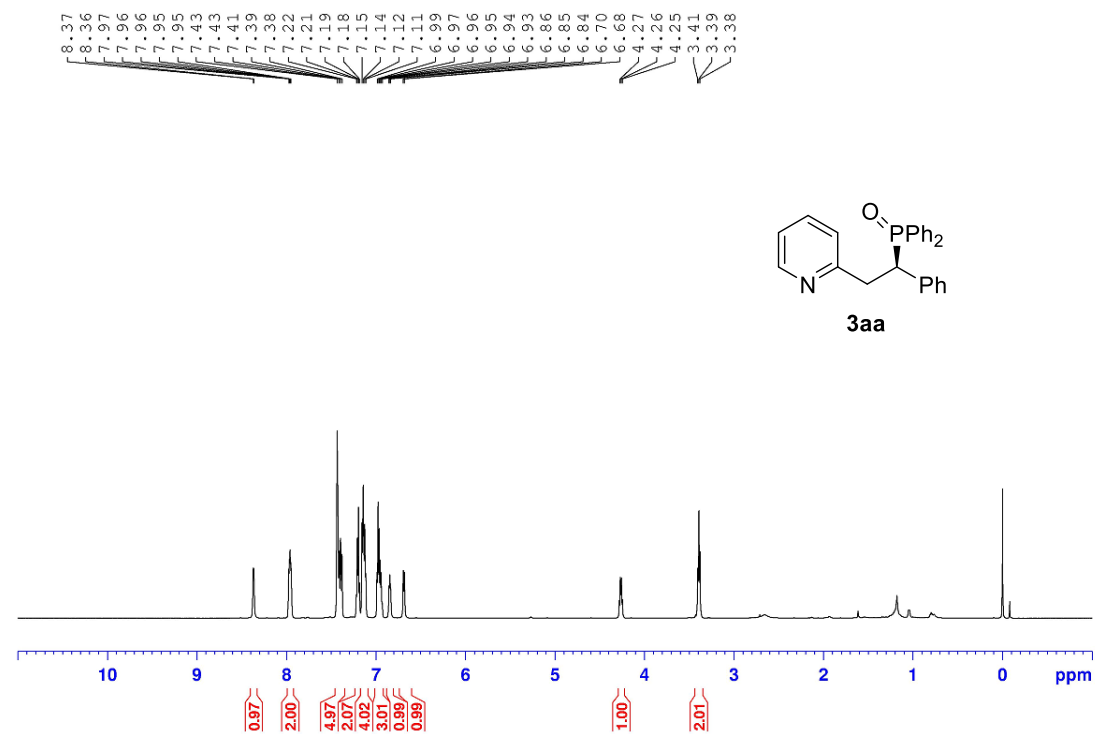

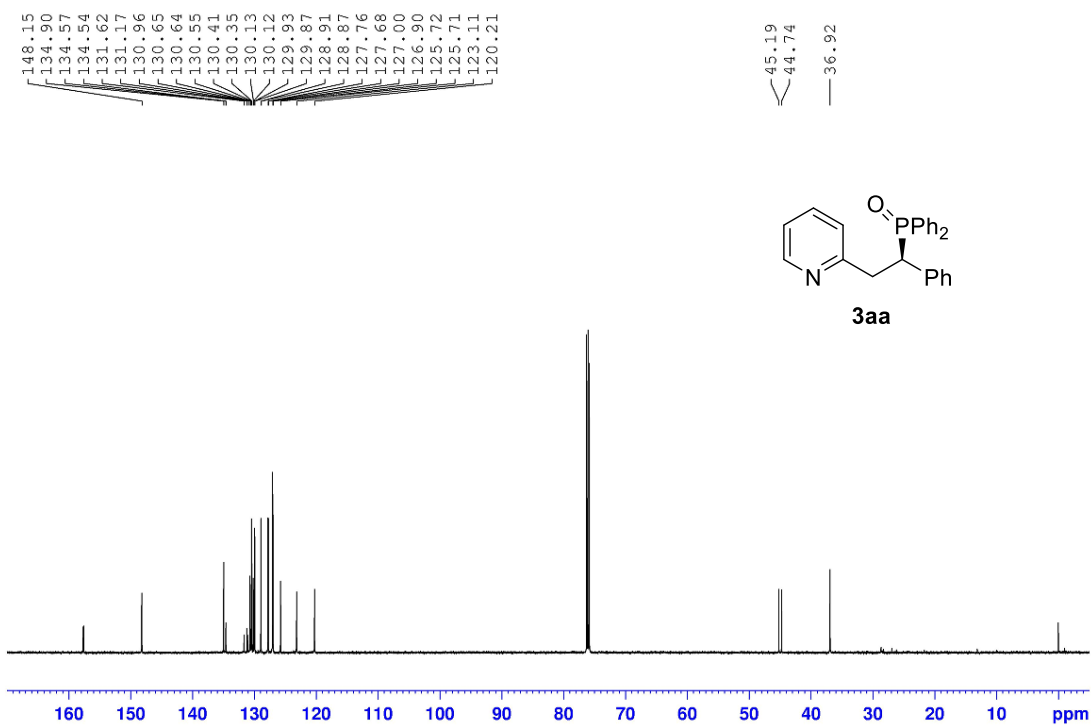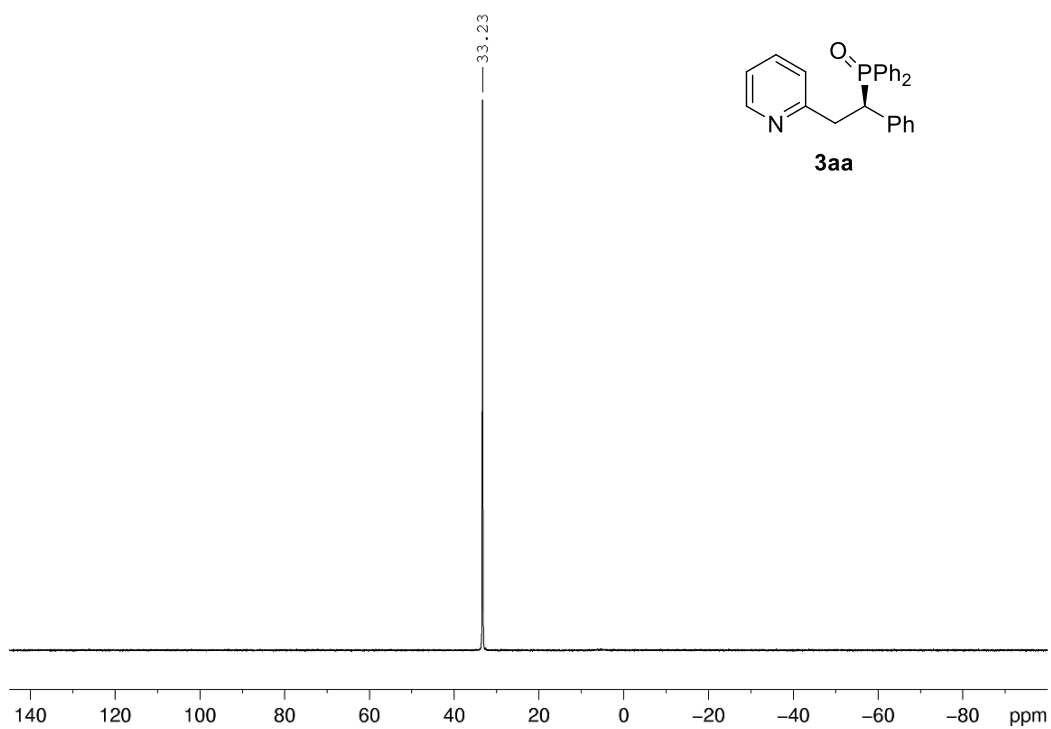

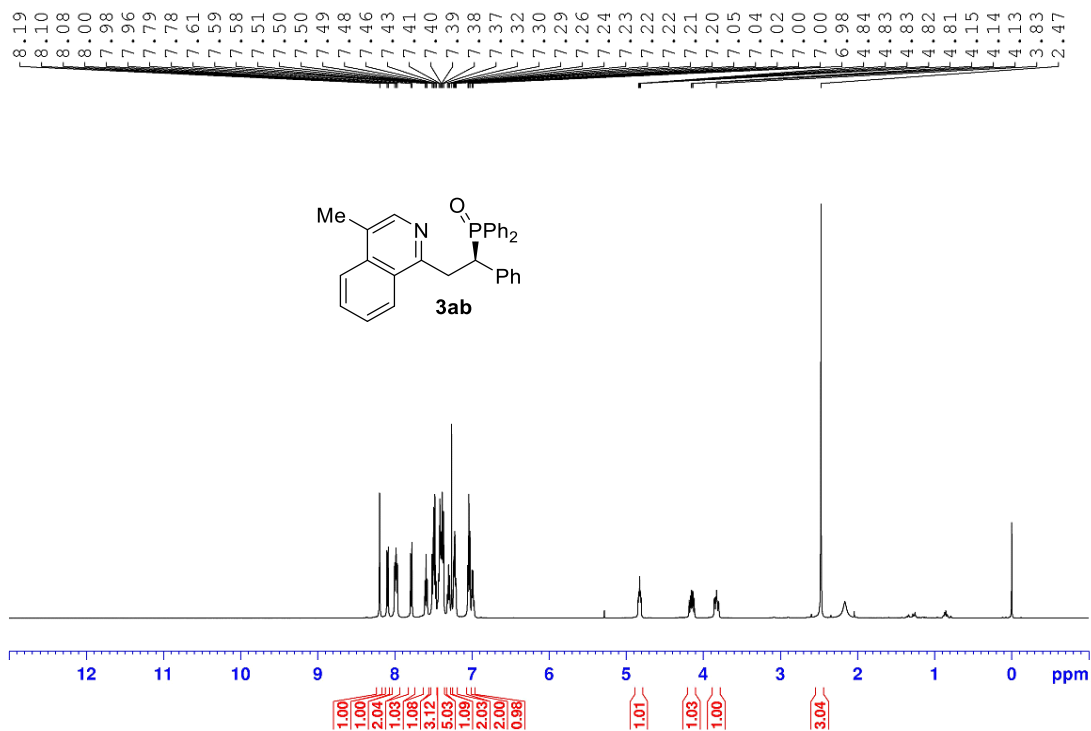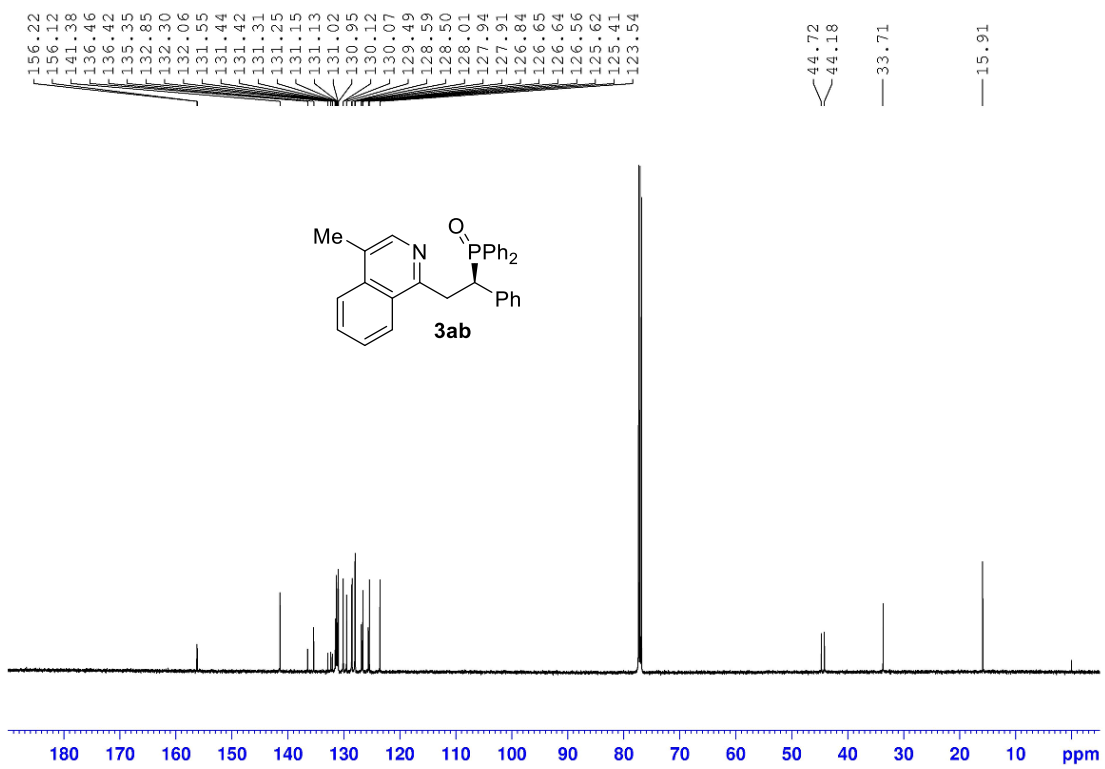

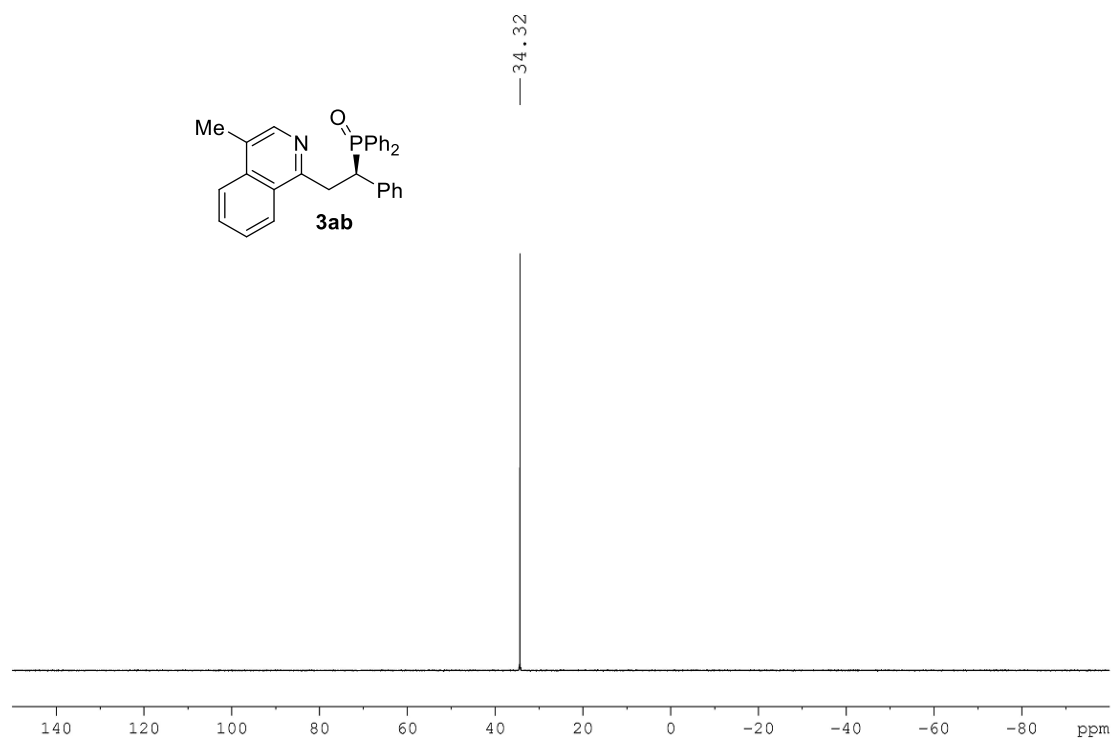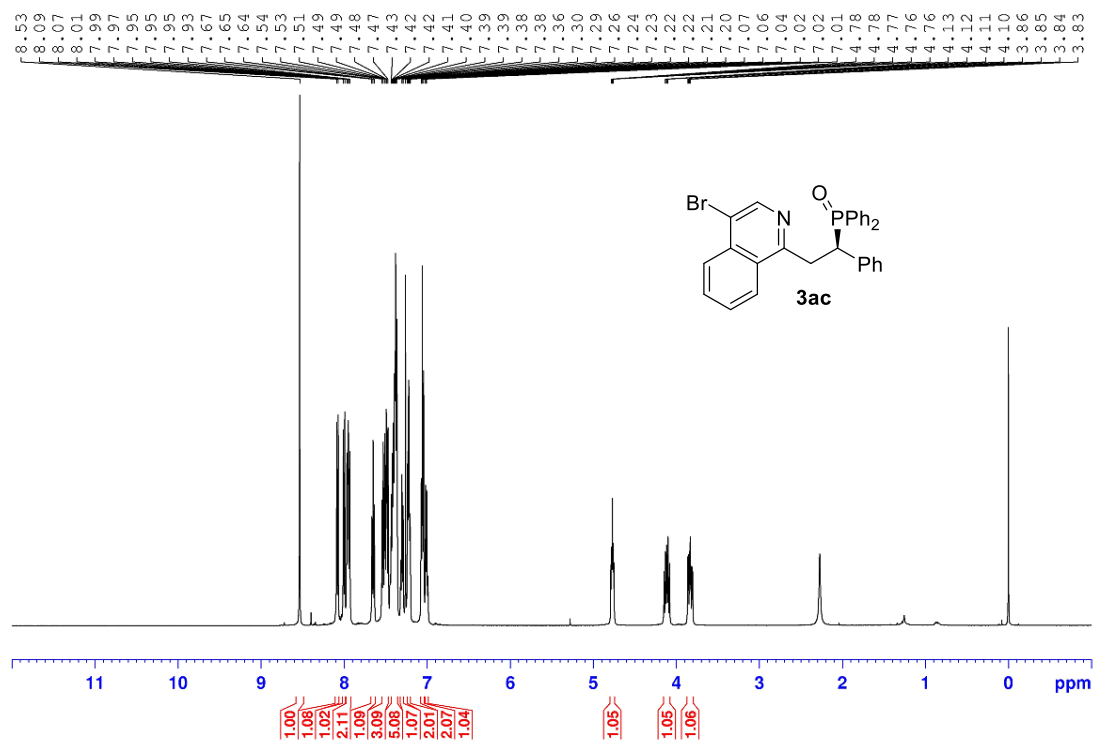

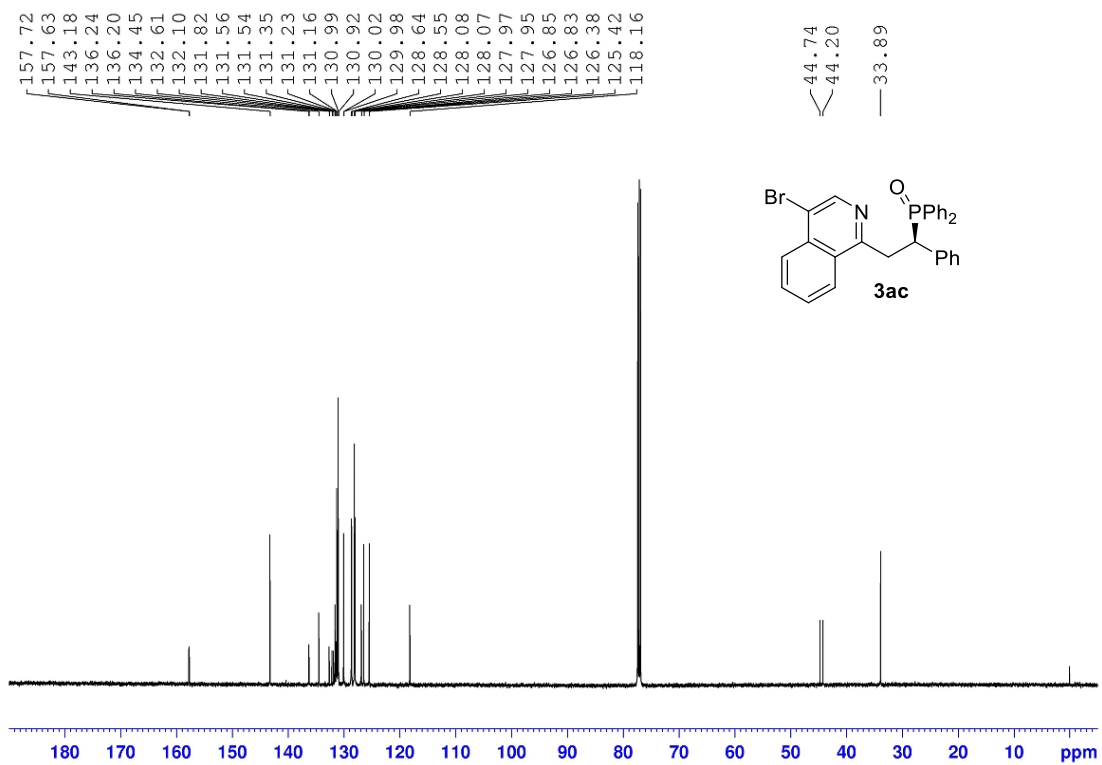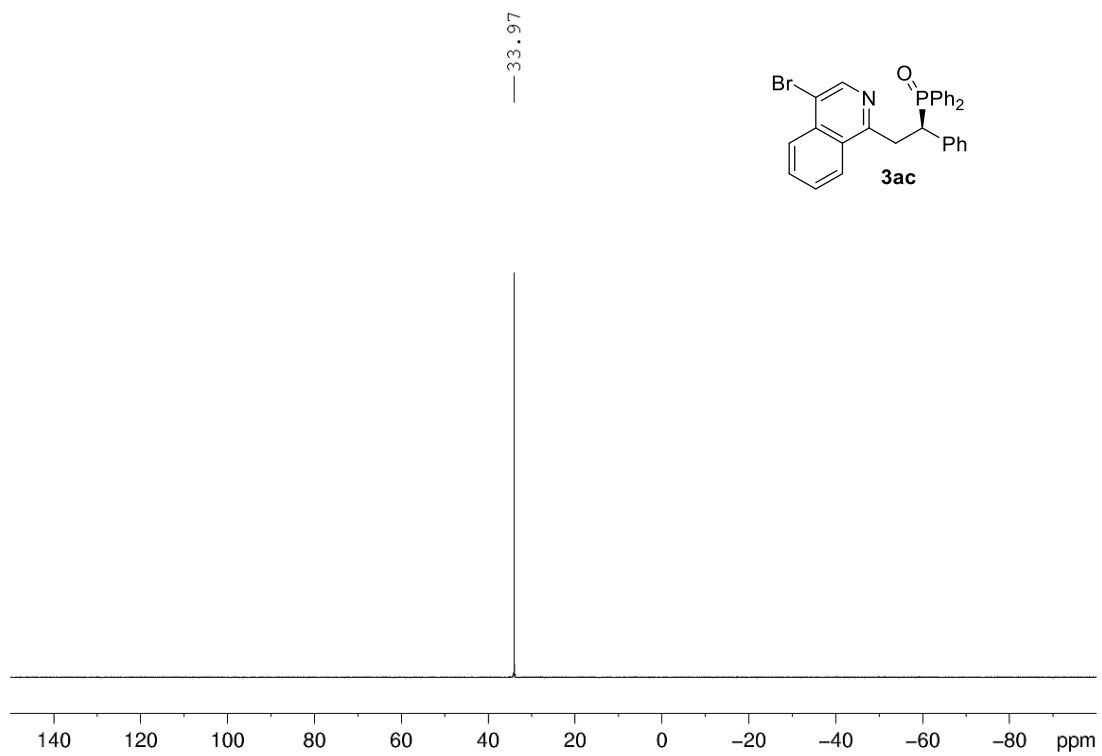

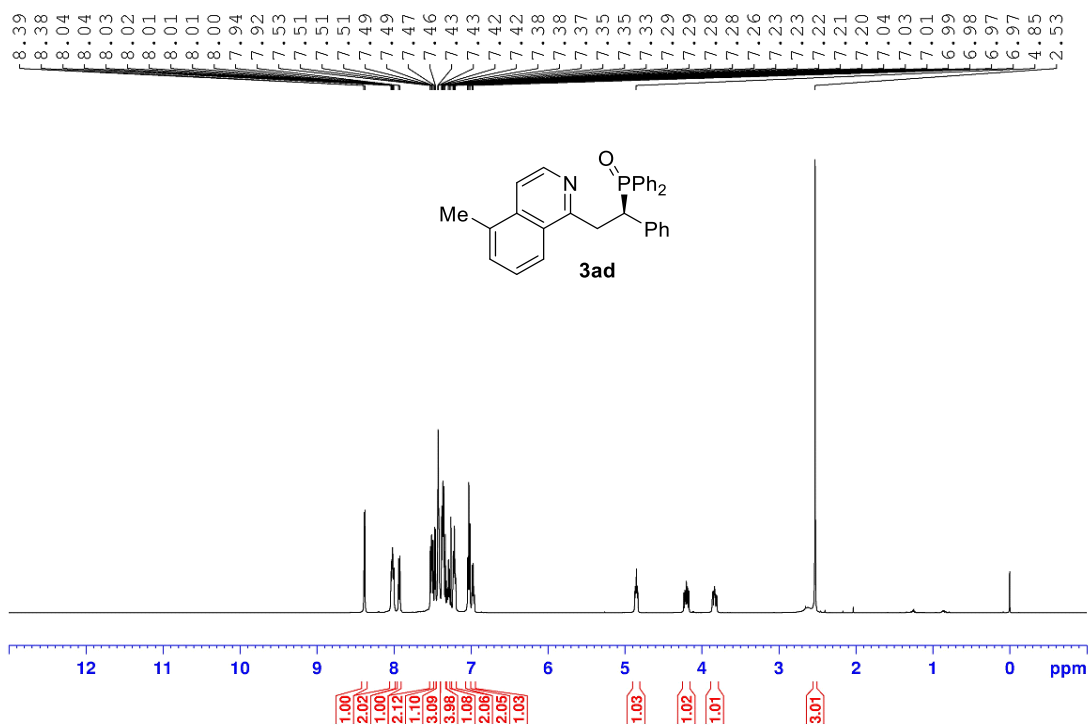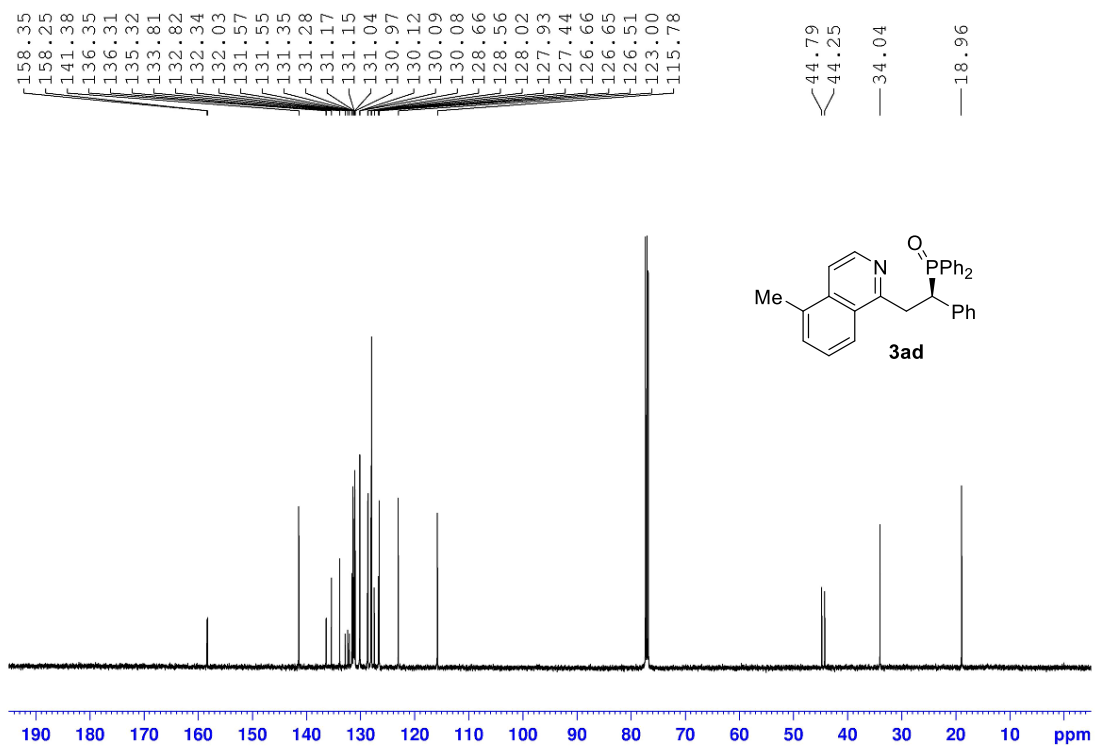



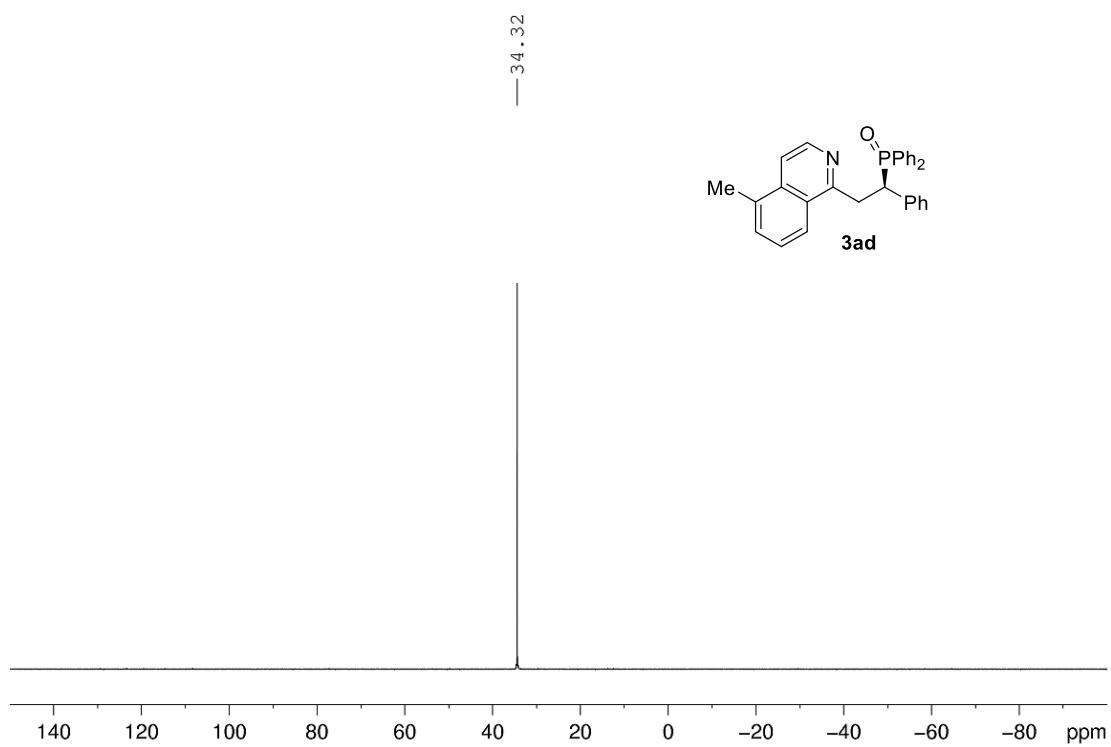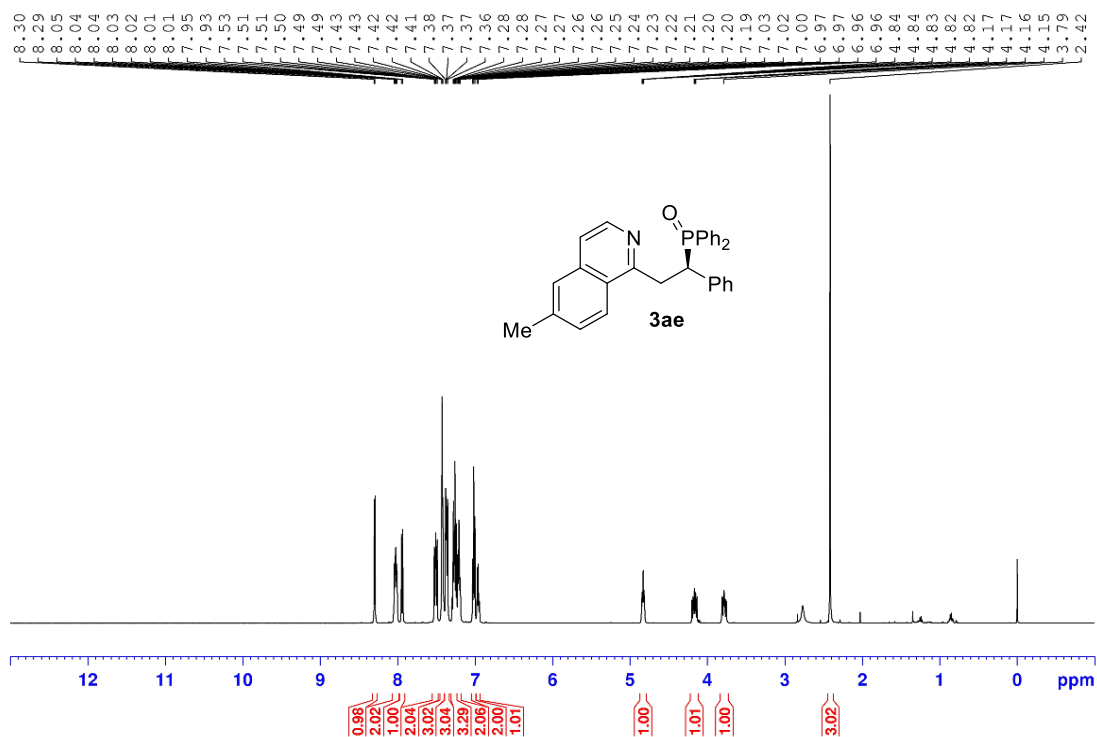

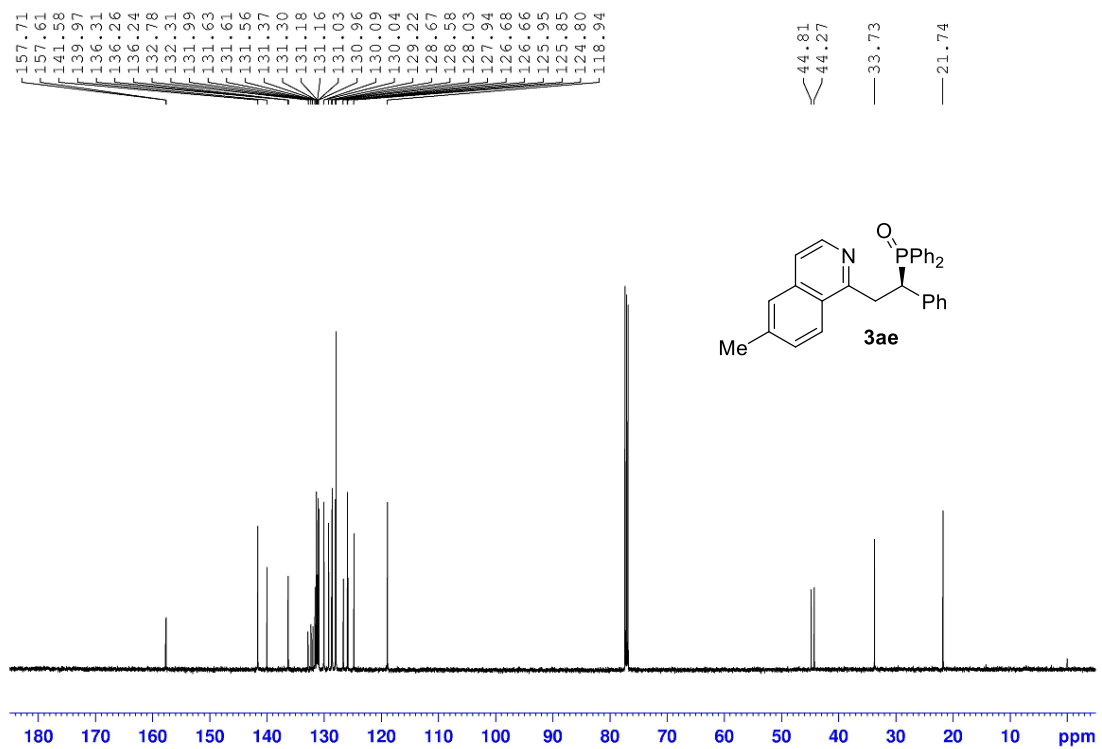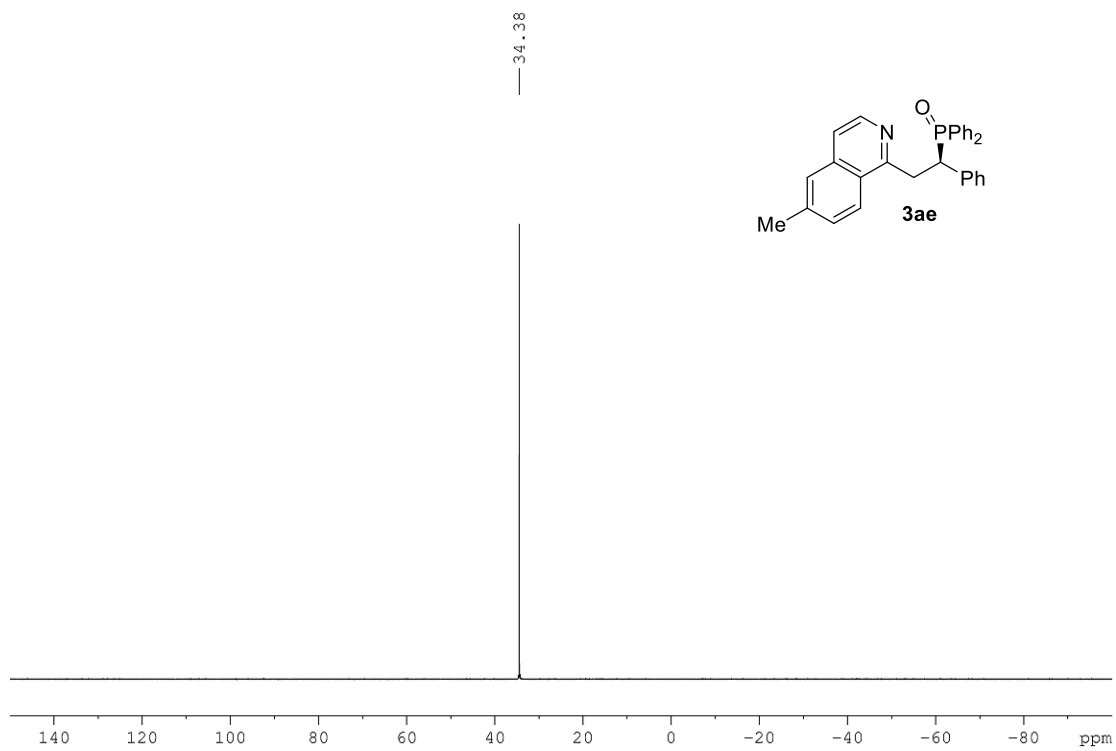

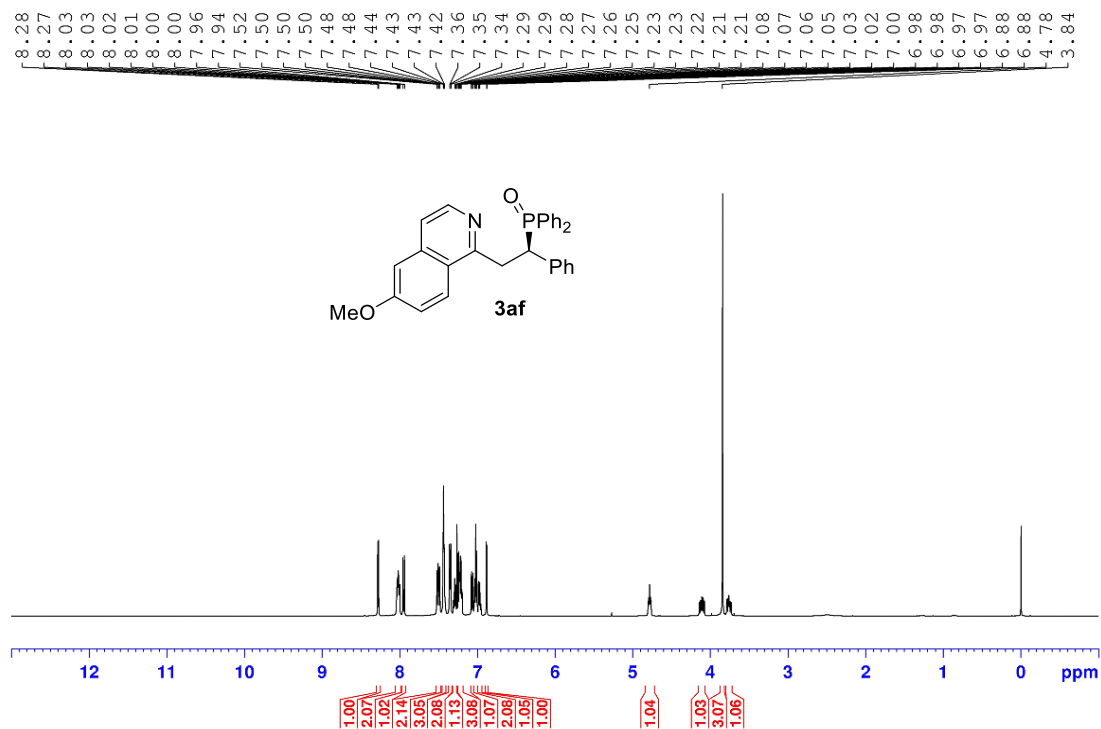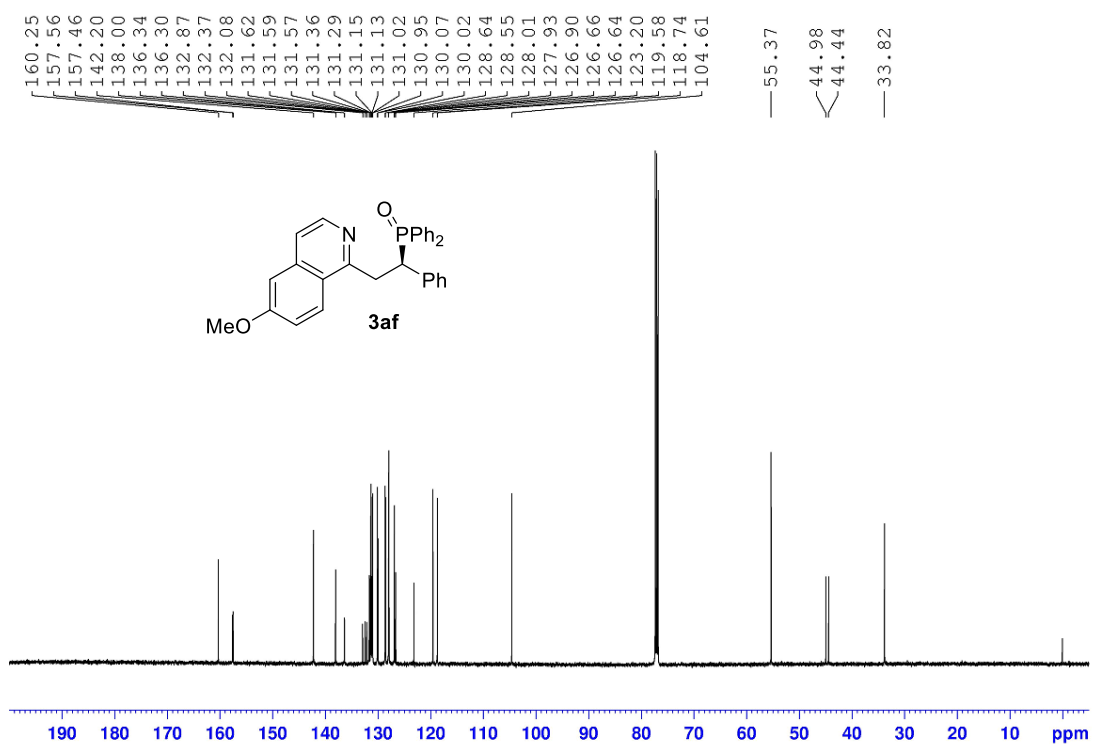

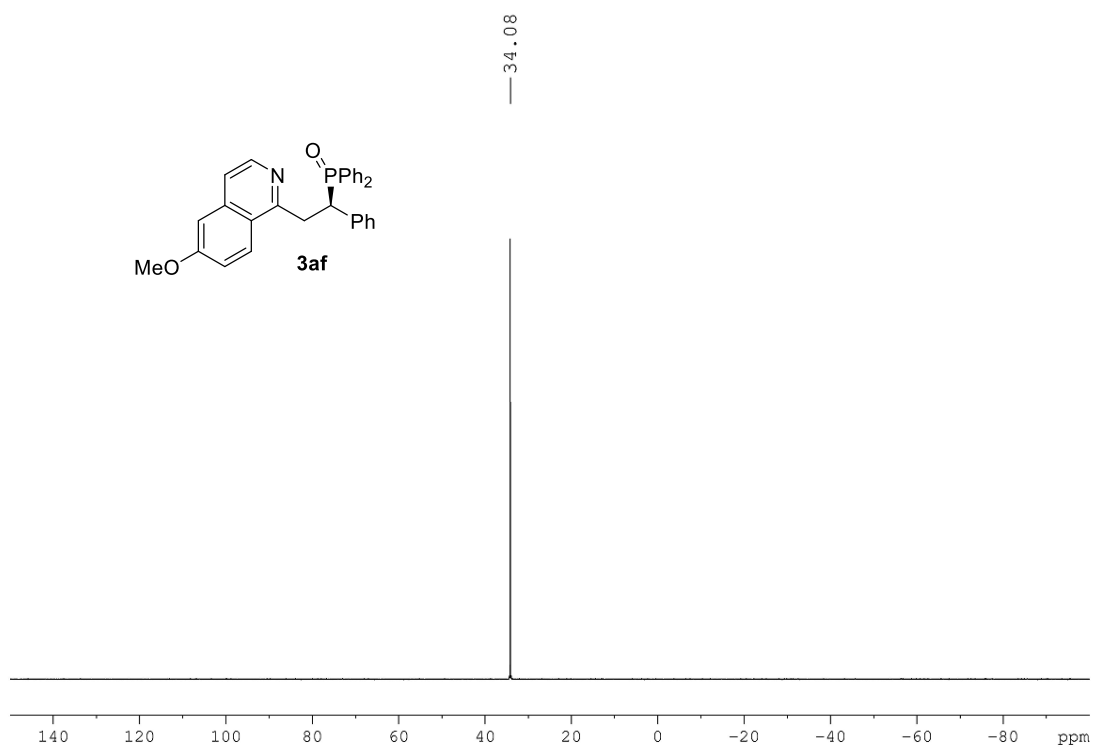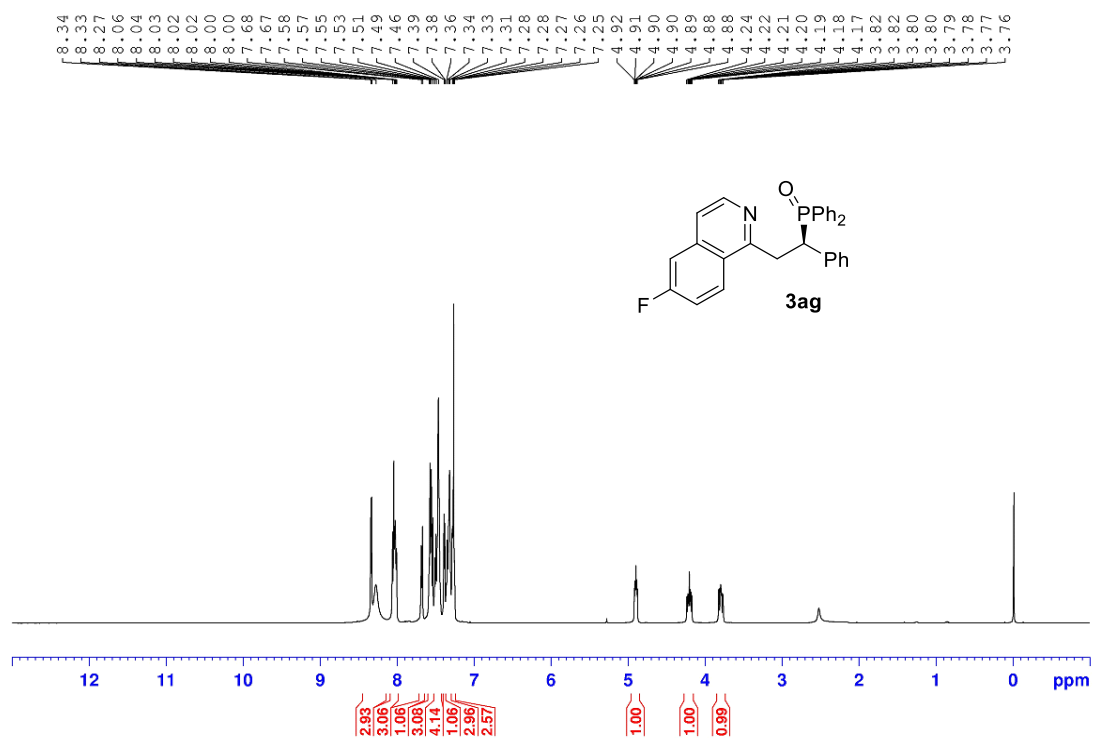

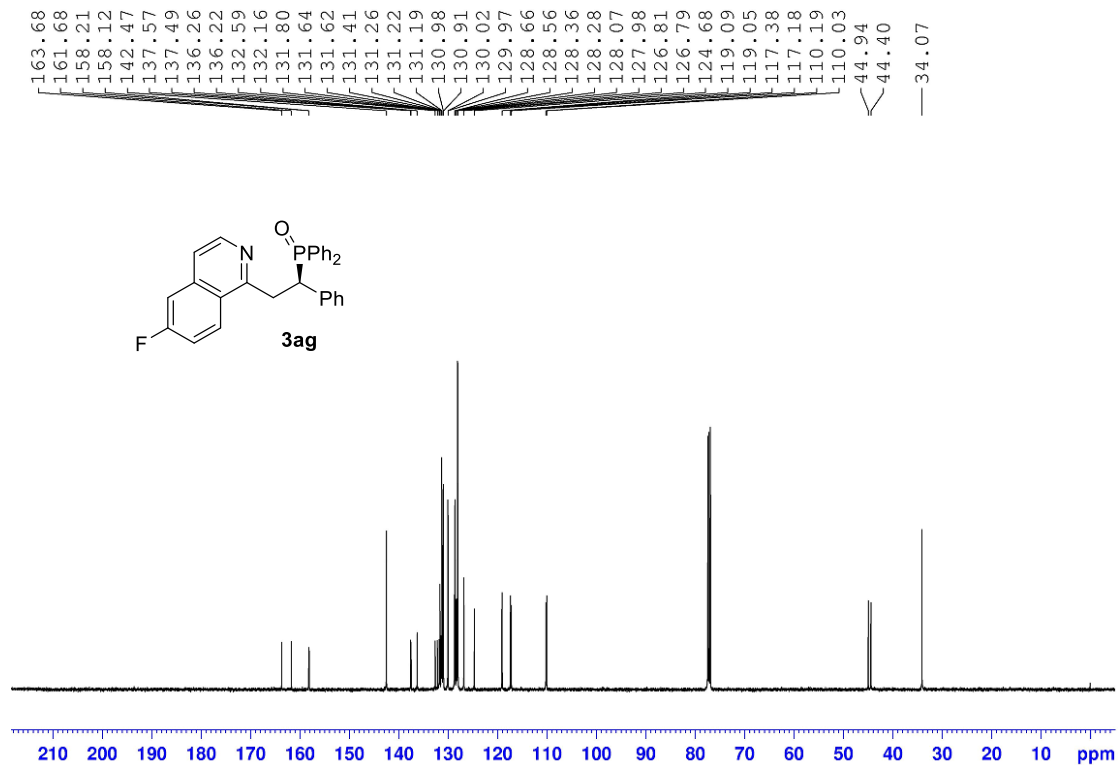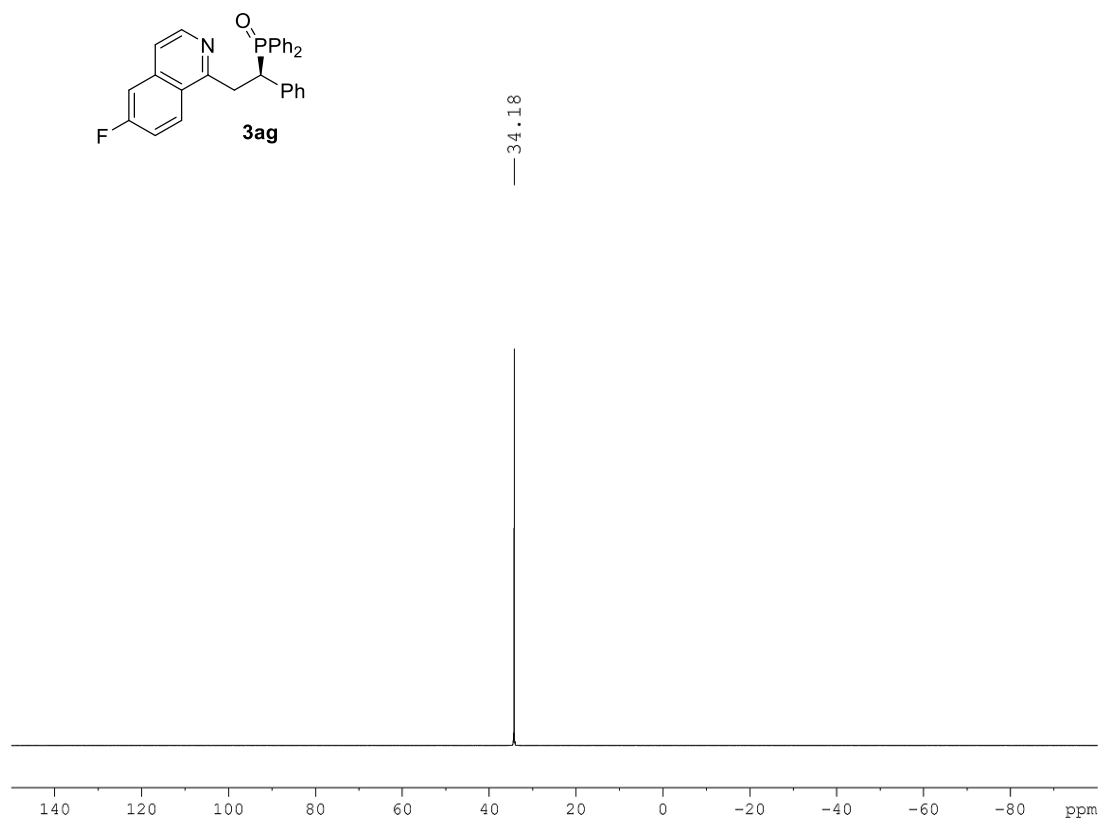

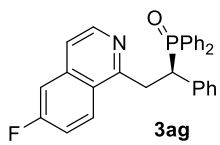

—108.49

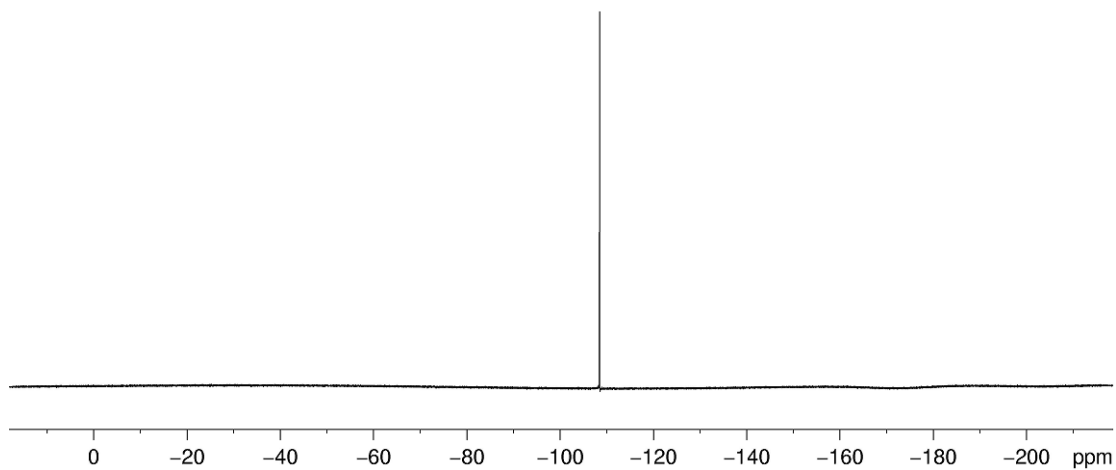

8.35  
 8.34  
 8.01  
 8.00  
 7.99  
 7.98  
 7.90  
 7.88  
 7.74  
 7.51  
 7.49  
 7.47  
 7.41  
 7.36  
 7.34  
 7.29  
 7.27  
 7.26  
 7.21  
 7.20  
 7.18  
 7.04  
 7.02  
 7.01  
 6.98  
 6.97  
 6.95  
 4.78  
 4.77  
 4.76  
 4.75  
 4.74  
 4.14  
 4.13  
 4.11  
 4.10  
 4.08  
 3.82  
 3.82  
 3.80  
 3.79  
 3.77  
 3.77

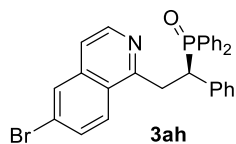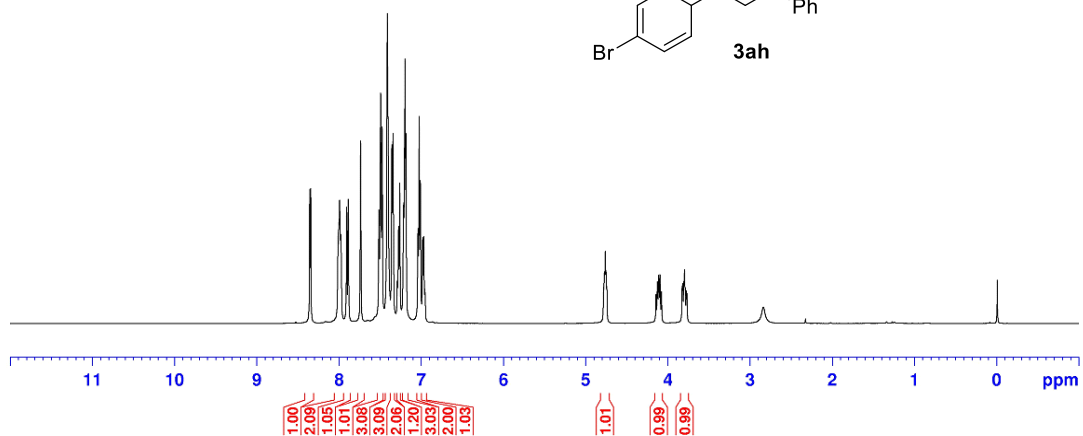

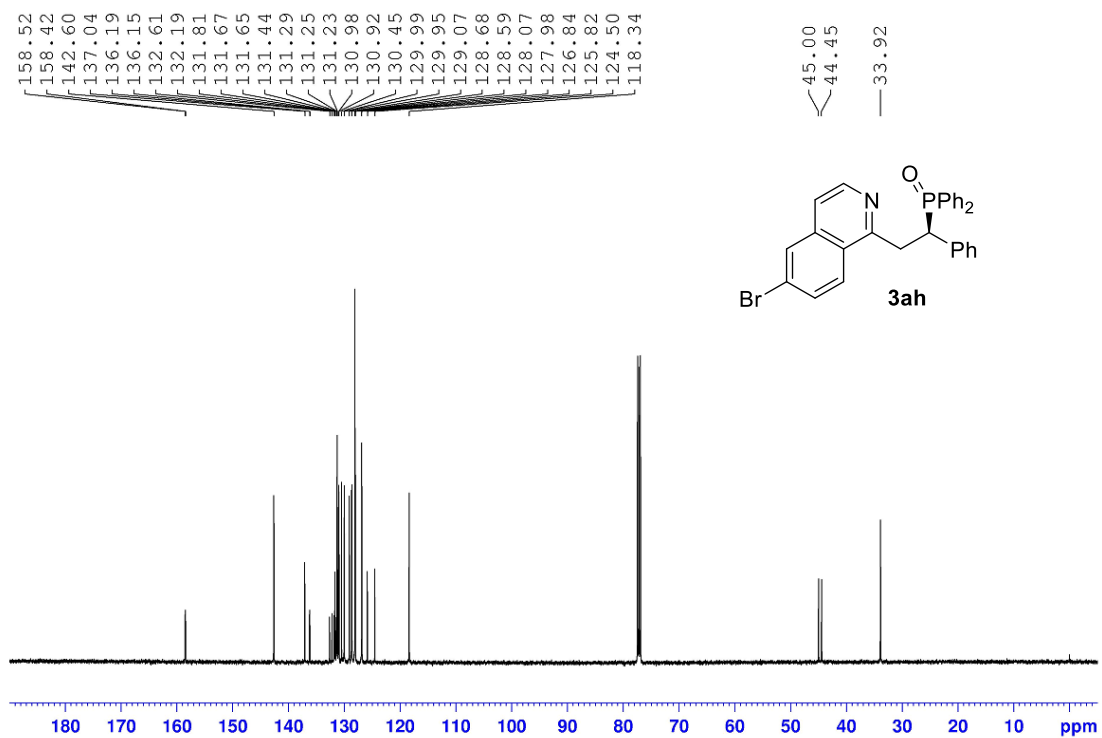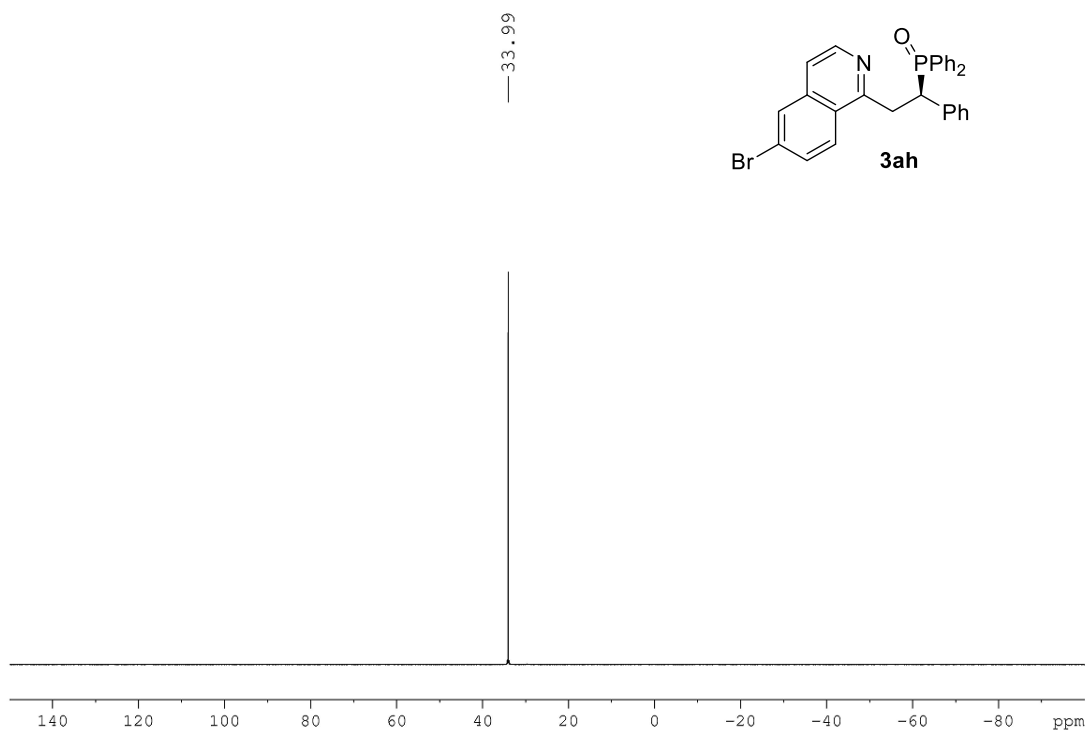

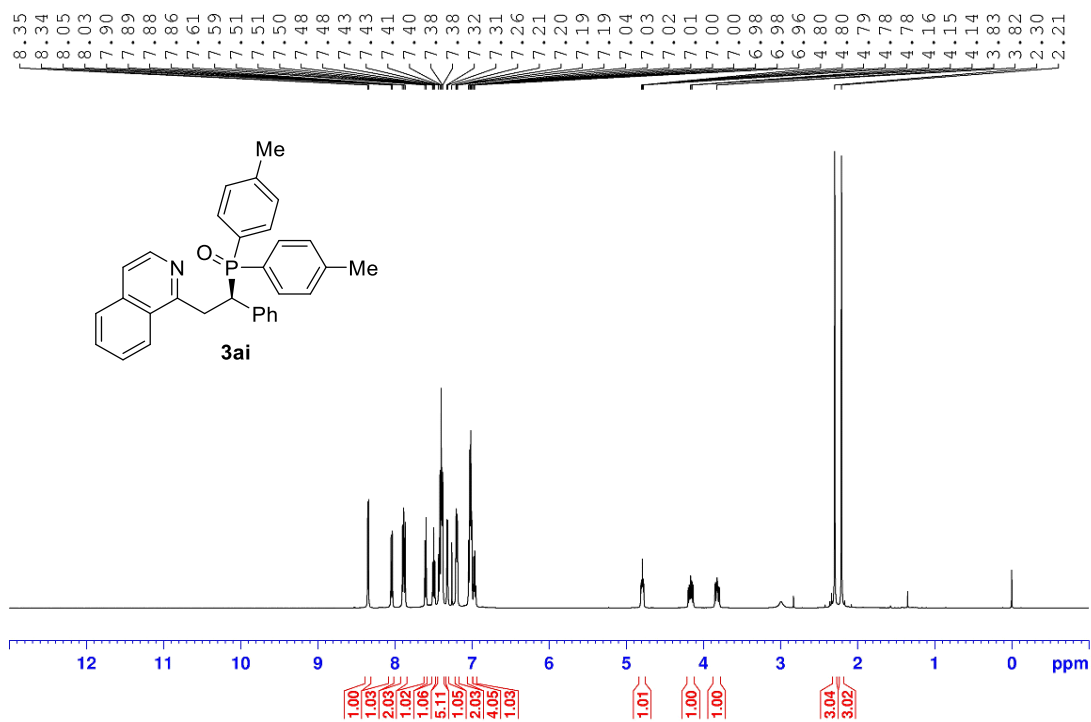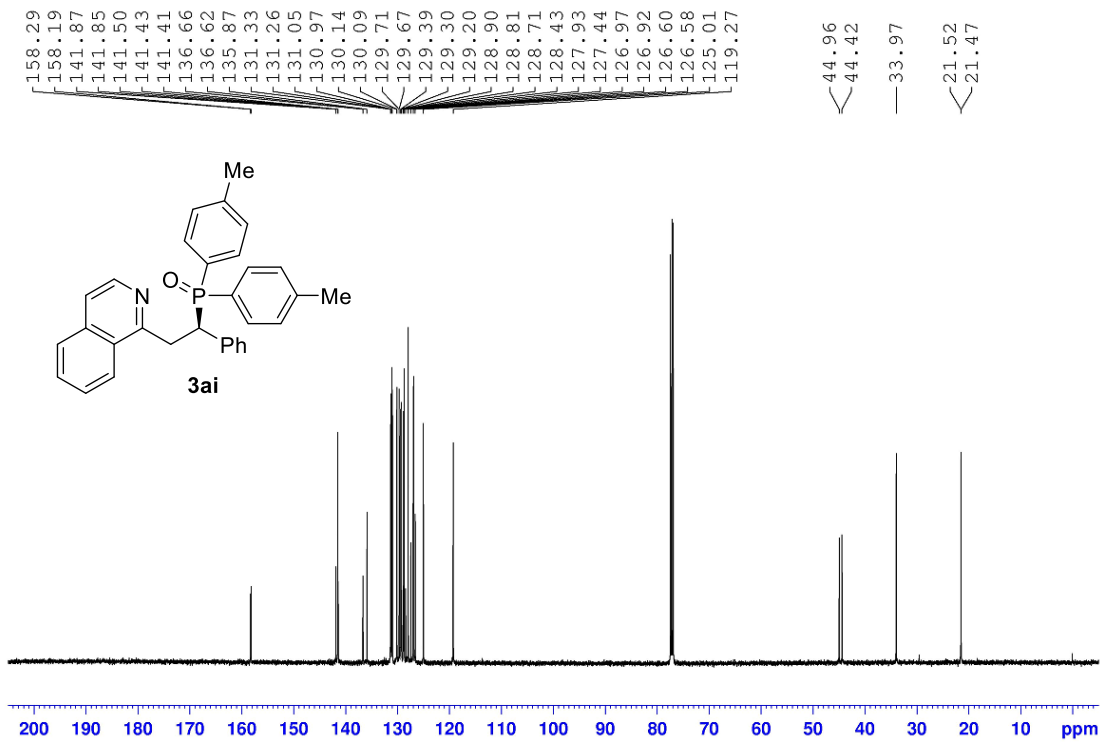



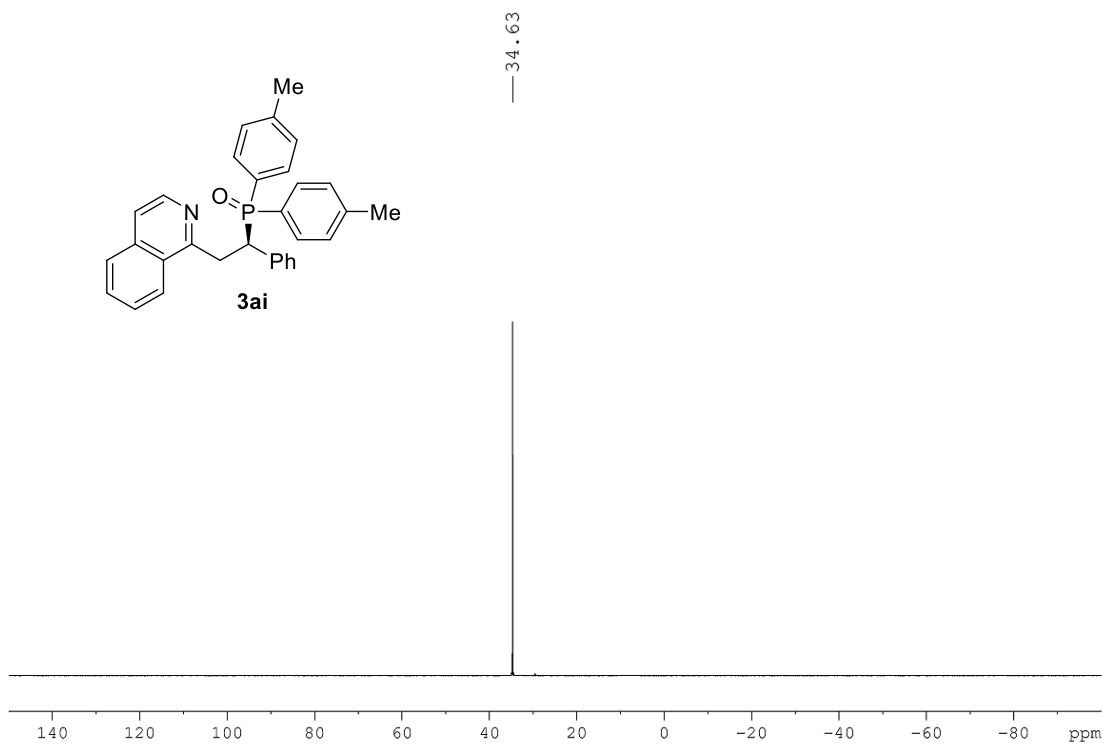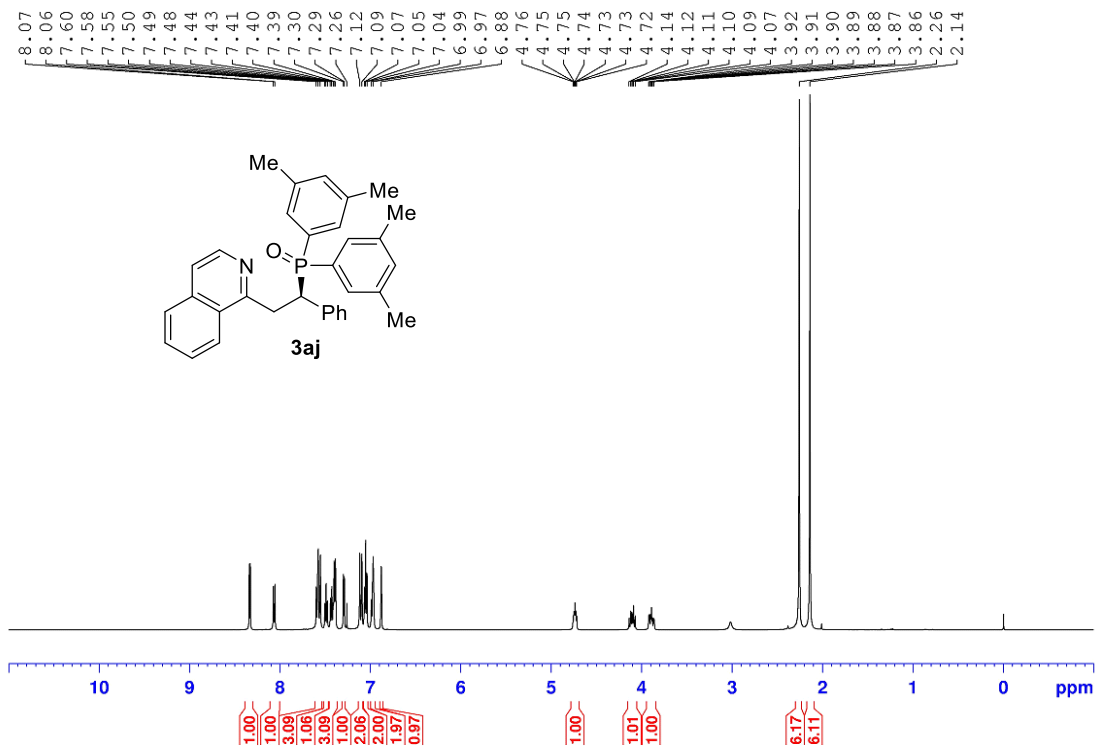

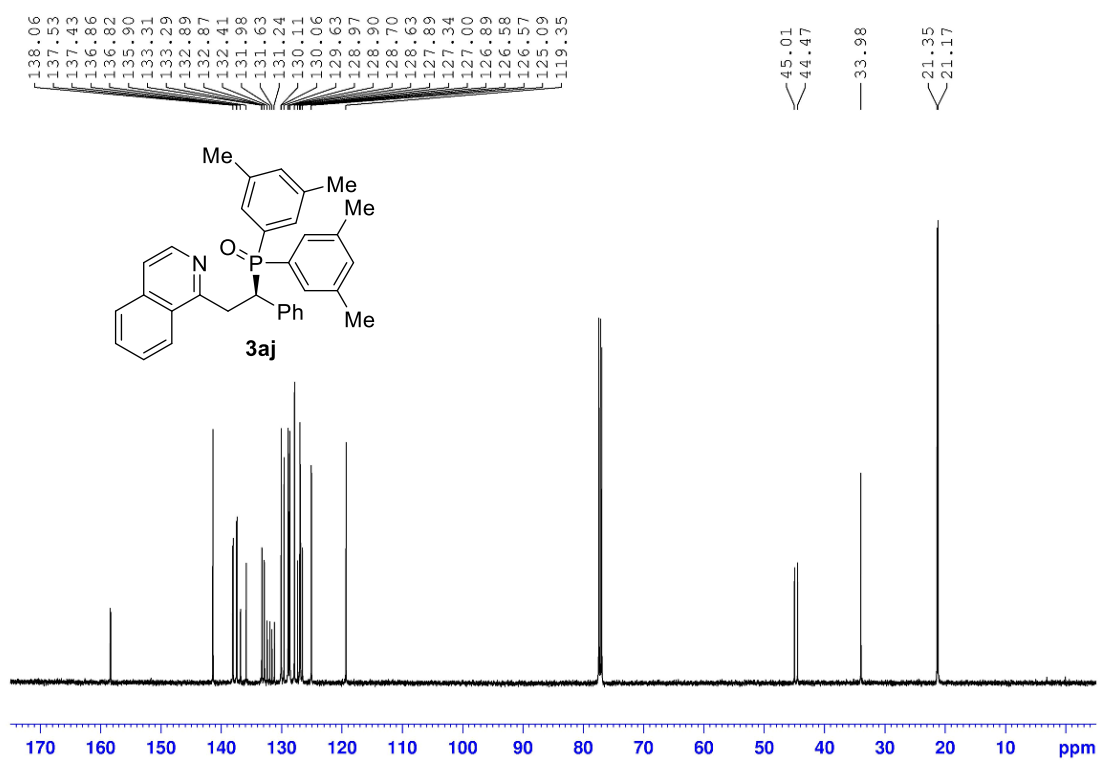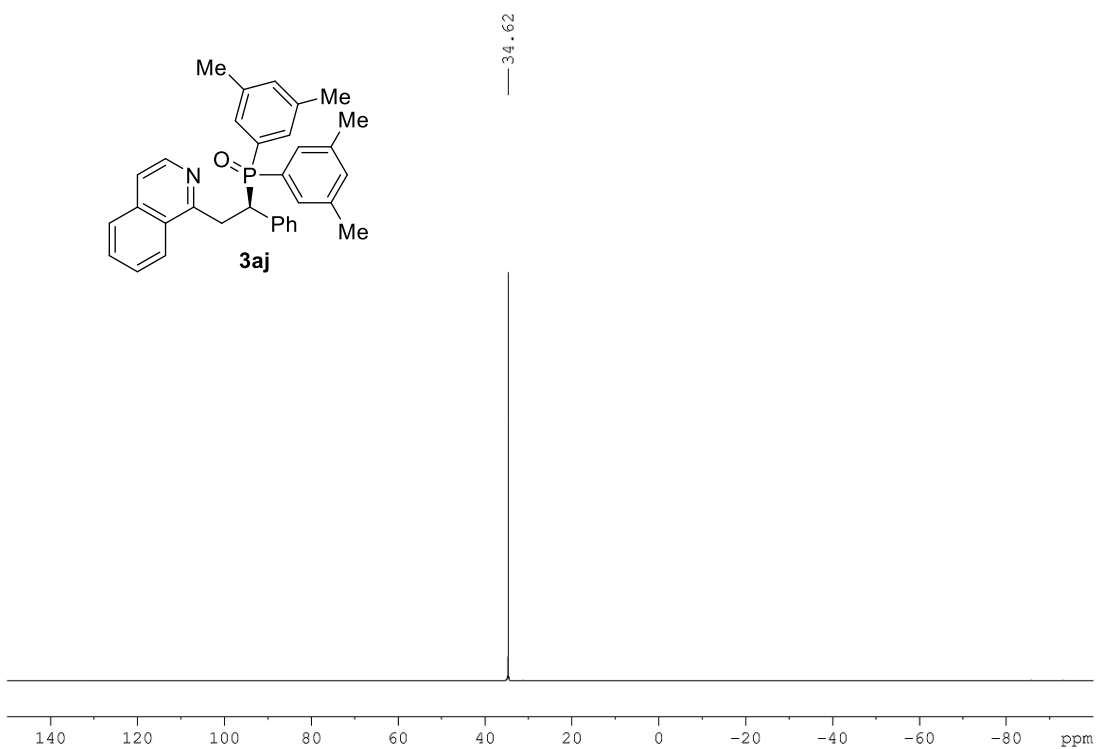

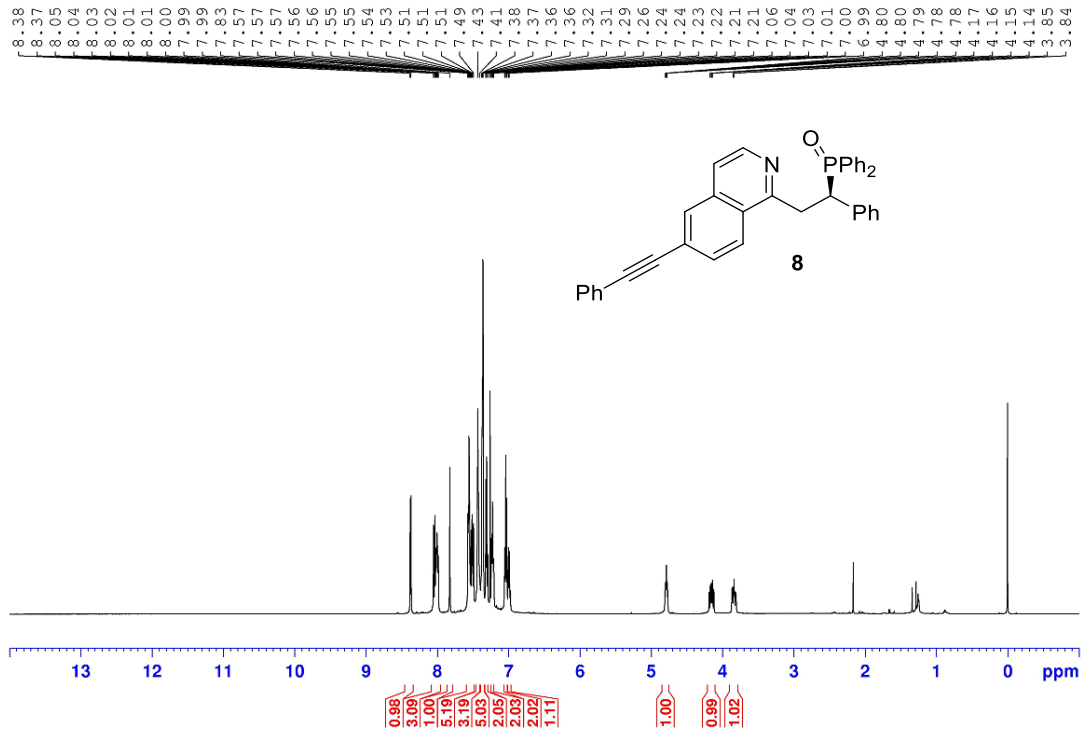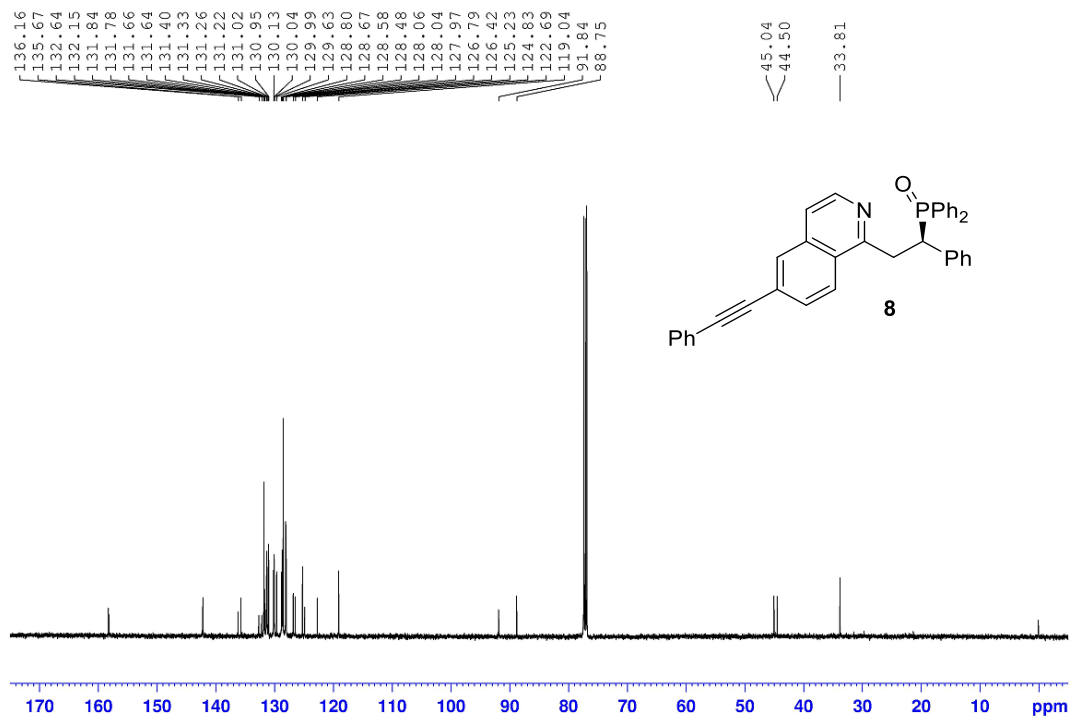

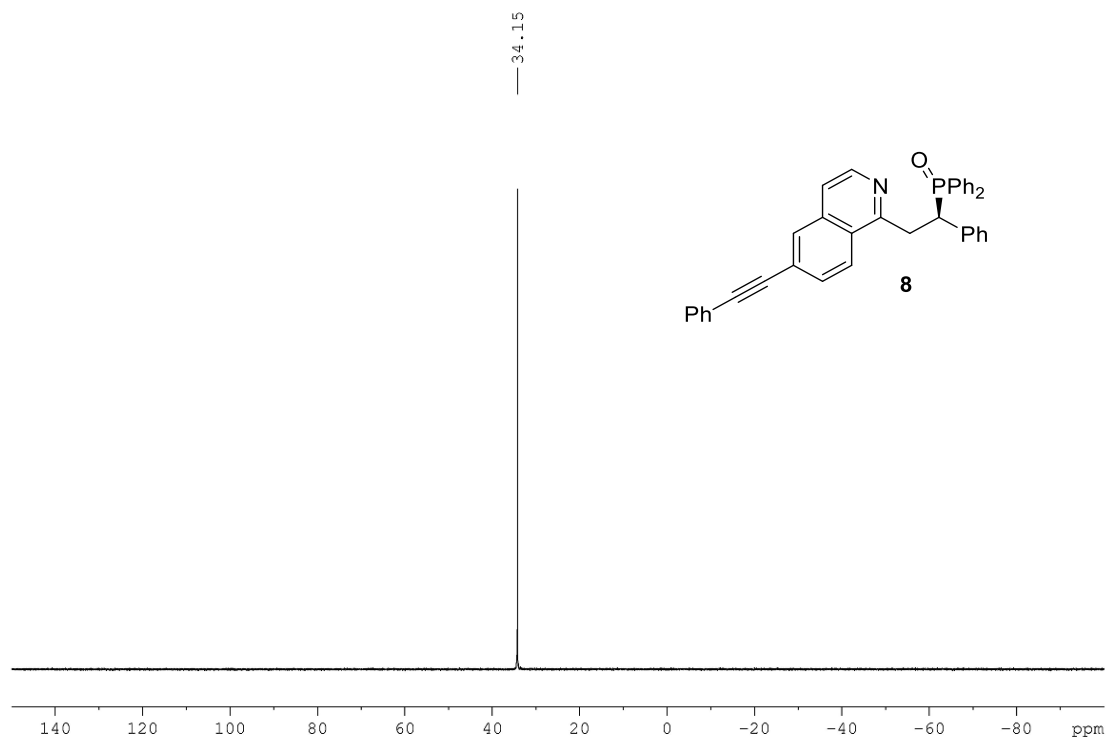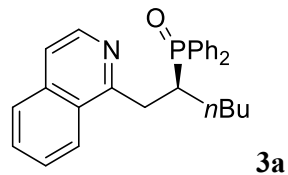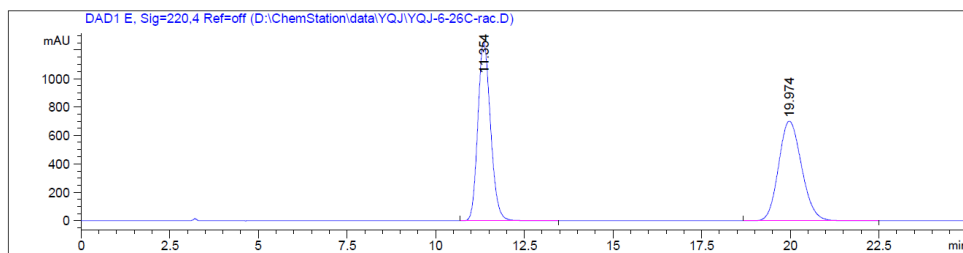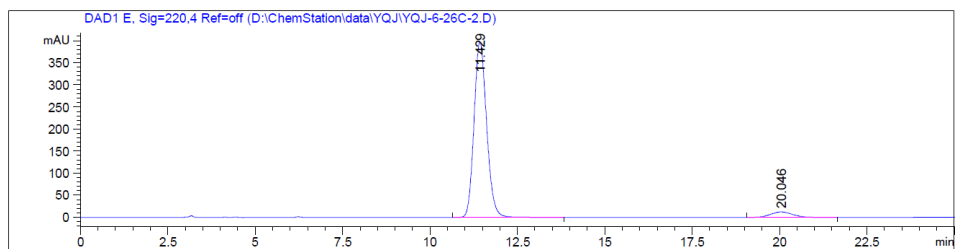

| Peak # | RetTime [min] | Type | Width [min] | Area [mAU*s] | Height [mAU] | Area %  |
|--------|---------------|------|-------------|--------------|--------------|---------|
| 1      | 11.429        | BB   | 0.3851      | 9924.44531   | 397.70752    | 94.8299 |
| 2      | 20.046        | BB   | 0.6760      | 541.07361    | 12.23334     | 5.1701  |

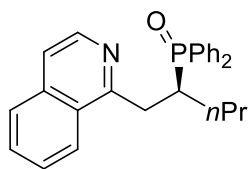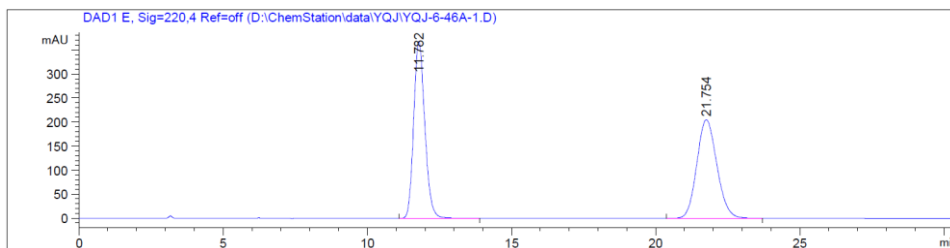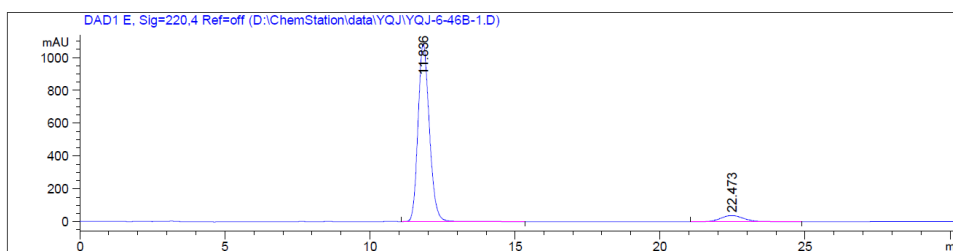

| Peak # | RetTime [min] | Type | Width [min] | Area [mAU*s] | Height [mAU] | Area %  |
|--------|---------------|------|-------------|--------------|--------------|---------|
| 1      | 11.836        | BB   | 0.4205      | 2.93964e4    | 1083.67822   | 93.2209 |
| 2      | 22.473        | BB   | 0.8539      | 2137.73413   | 38.13985     | 6.7791  |

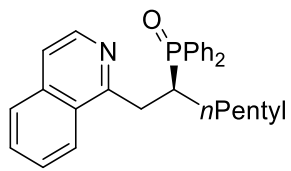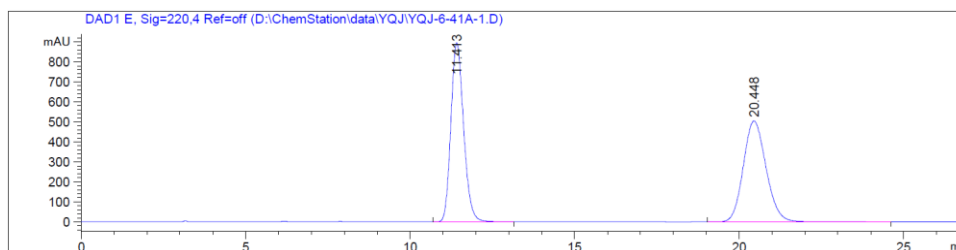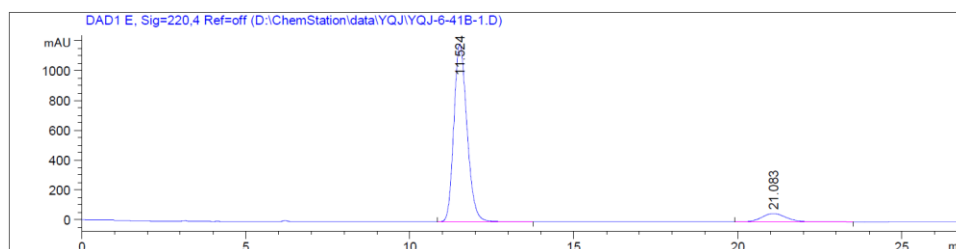

| Peak # | RetTime [min] | Type | Width [min] | Area [mAU*s] | Height [mAU] | Area %  |
|--------|---------------|------|-------------|--------------|--------------|---------|
| 1      | 11.524        | BB   | 0.4306      | 3.31498e4    | 1191.49487   | 92.0744 |
| 2      | 21.083        | BB   | 0.7841      | 2853.48022   | 56.03237     | 7.9256  |

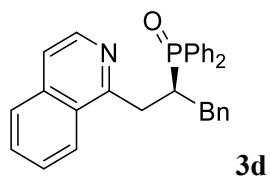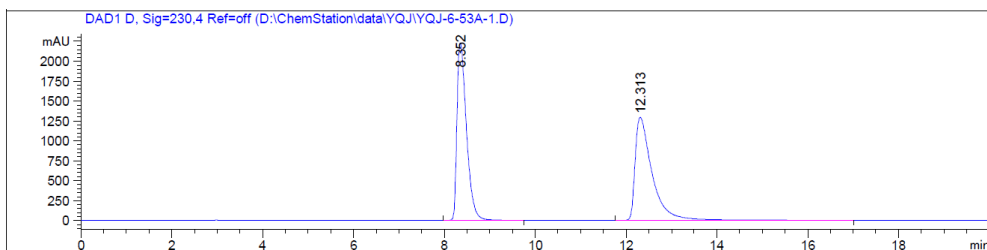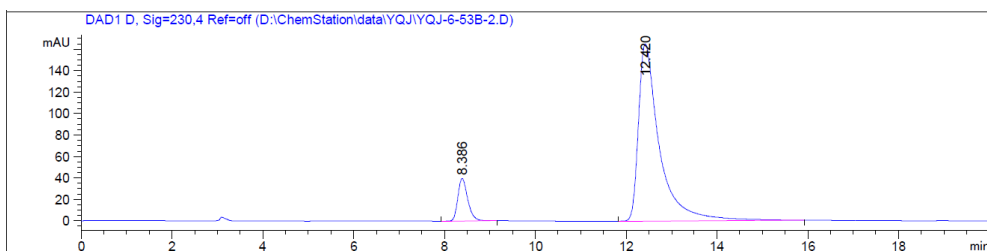

| Peak # | RetTime [min] | Type | Width [min] | Area [mAU*s] | Height [mAU] | Area %  |
|--------|---------------|------|-------------|--------------|--------------|---------|
| 1      | 8.386         | BB   | 0.2334      | 604.41193    | 39.75169     | 10.2231 |
| 2      | 12.420        | BB   | 0.4667      | 5307.80322   | 165.25458    | 89.7769 |

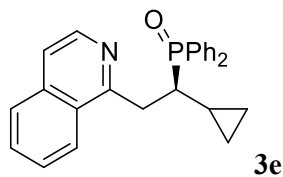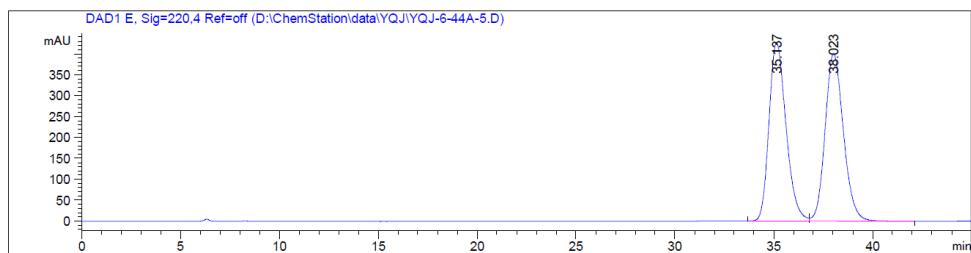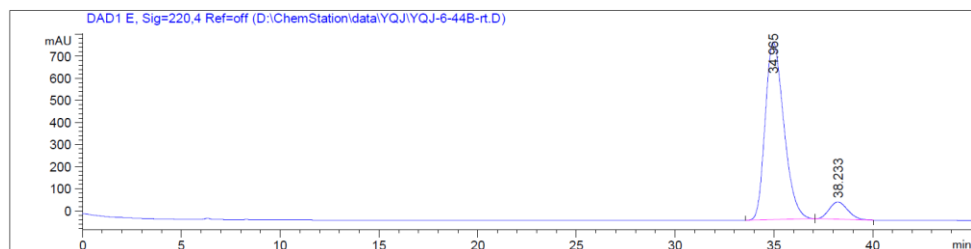

| Peak # | RetTime [min] | Type | Width [min] | Area [mAU*s] | Height [mAU] | Area %  |
|--------|---------------|------|-------------|--------------|--------------|---------|
| 1      | 34.965        | BB   | 1.0289      | 5.28156e4    | 803.43445    | 91.2214 |
| 2      | 38.233        | BB   | 1.0157      | 5082.64063   | 78.26283     | 8.7786  |

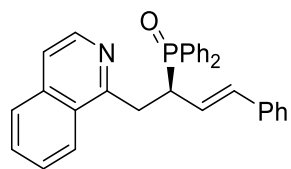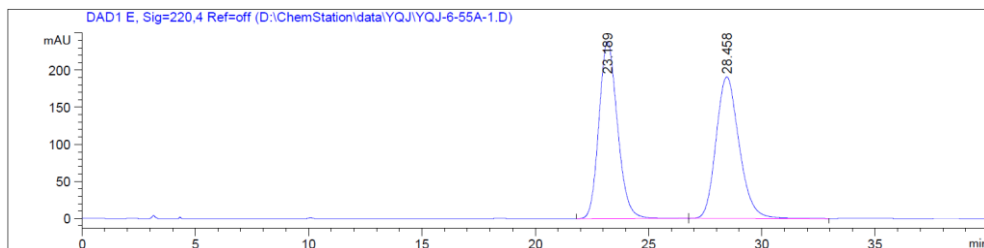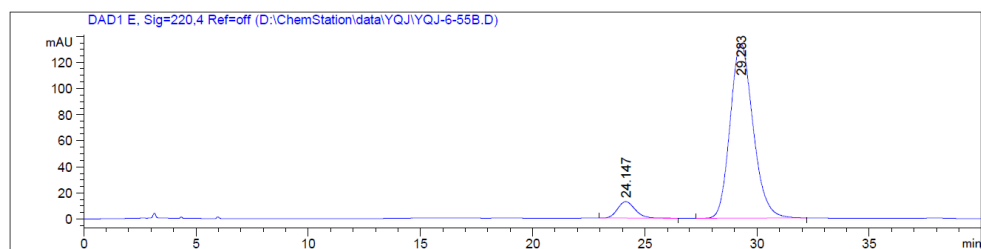

| Peak # | RetTime [min] | Type | Width [min] | Area [mAU*s] | Height [mAU] | Area %  |
|--------|---------------|------|-------------|--------------|--------------|---------|
| 1      | 24.147        | BB   | 0.8110      | 696.42694    | 12.63533     | 6.8451  |
| 2      | 29.283        | BB   | 1.0831      | 9477.73535   | 133.69102    | 93.1549 |

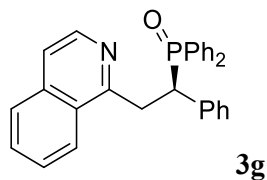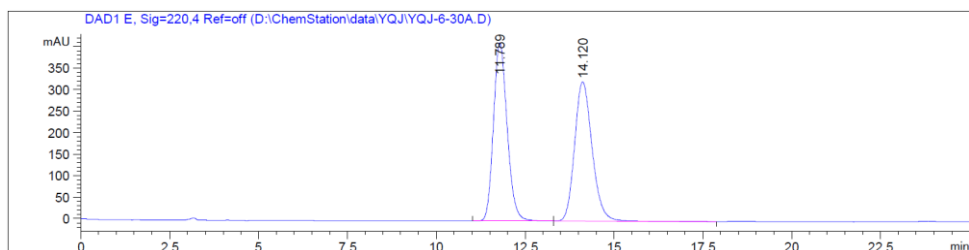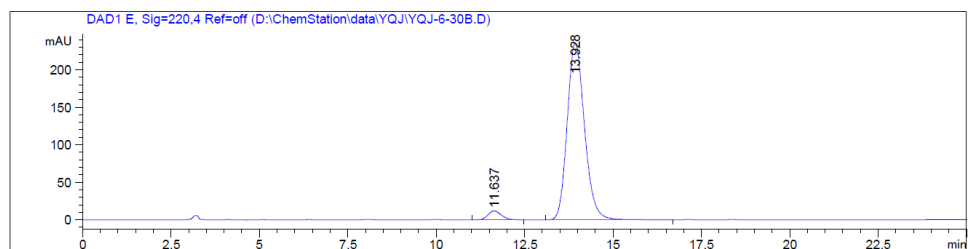

| Peak # | RetTime [min] | Type | Width [min] | Area [mAU*s] | Height [mAU] | Area %  |
|--------|---------------|------|-------------|--------------|--------------|---------|
| 1      | 11.637        | BB   | 0.4088      | 313.73672    | 11.85365     | 3.7525  |
| 2      | 13.928        | BB   | 0.5255      | 8046.94336   | 236.20525    | 96.2475 |

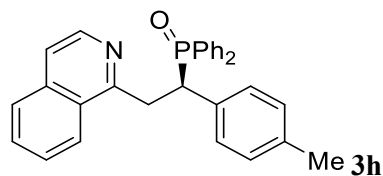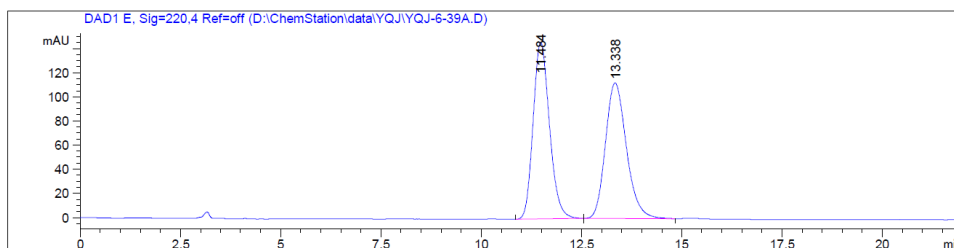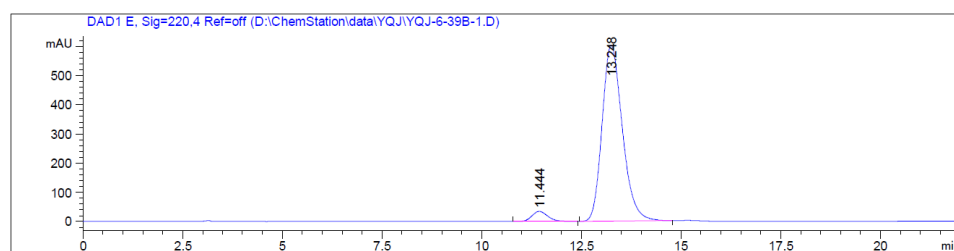

| Peak # | RetTime [min] | Type | Width [min] | Area [mAU*s] | Height [mAU] | Area %  |
|--------|---------------|------|-------------|--------------|--------------|---------|
| 1      | 11.444        | BB   | 0.4268      | 944.69141    | 34.35314     | 4.2541  |
| 2      | 13.248        | BB   | 0.5433      | 2.12619e4    | 603.06189    | 95.7459 |

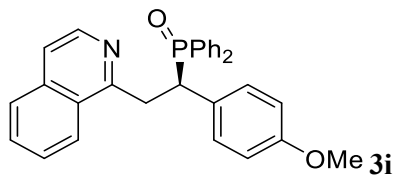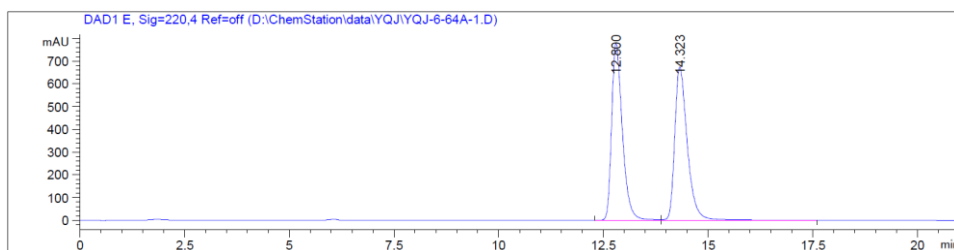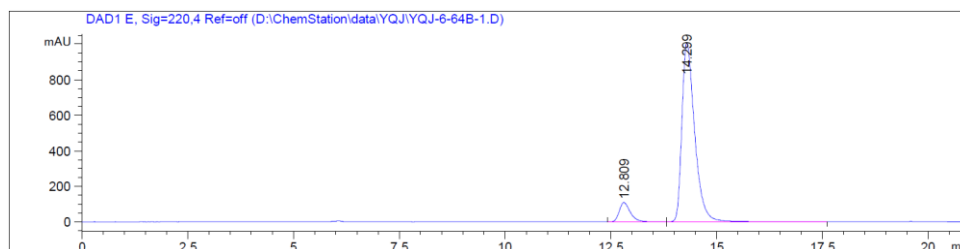

| Peak # | RetTime [min] | Type | Width [min] | Area [mAU*s] | Height [mAU] | Area %  |
|--------|---------------|------|-------------|--------------|--------------|---------|
| 1      | 12.809        | BB   | 0.2750      | 1956.72766   | 108.16792    | 8.4807  |
| 2      | 14.299        | BB   | 0.3189      | 2.11159e4    | 1005.73932   | 91.5193 |



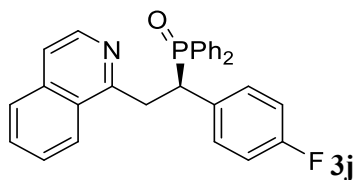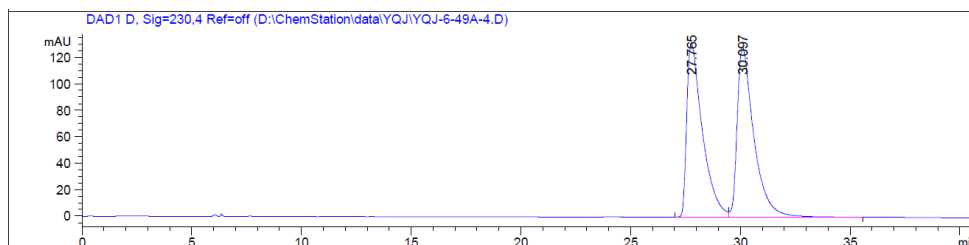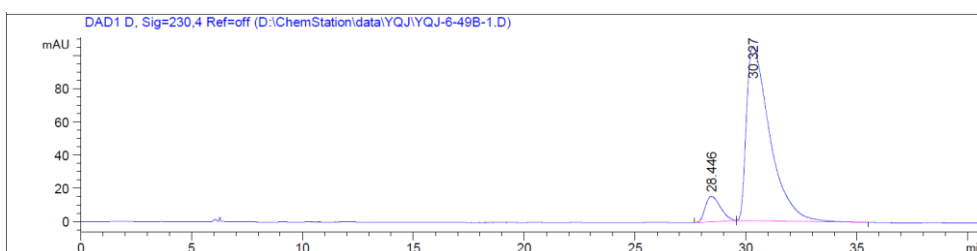

| Peak # | RetTime [min] | Type | Width [min] | Area [mAU*s] | Height [mAU] | Area %  |
|--------|---------------|------|-------------|--------------|--------------|---------|
| 1      | 28.446        | BB   | 0.7275      | 716.52228    | 15.21234     | 8.5601  |
| 2      | 30.327        | BB   | 1.1157      | 7654.00635   | 104.84689    | 91.4399 |

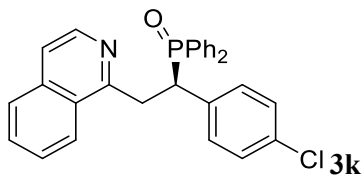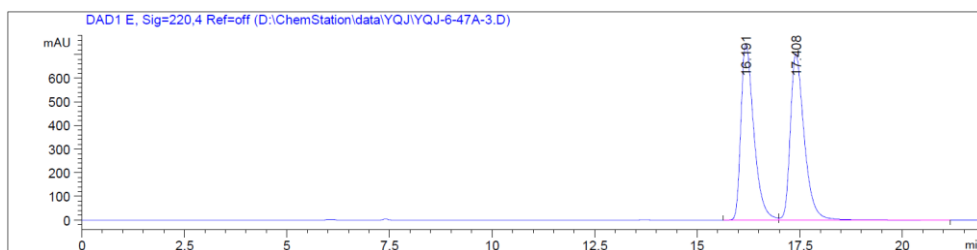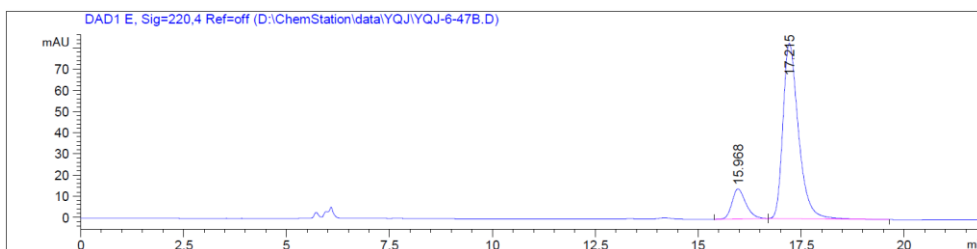

| Peak # | RetTime [min] | Type | Width [min] | Area [mAU*s] | Height [mAU] | Area %  |
|--------|---------------|------|-------------|--------------|--------------|---------|
| 1      | 15.968        | BB   | 0.3555      | 331.99643    | 14.16057     | 13.2011 |
| 2      | 17.215        | BB   | 0.3996      | 2182.92578   | 82.79558     | 86.7989 |

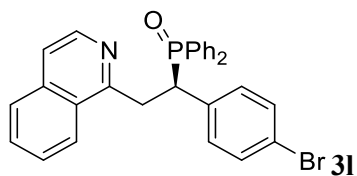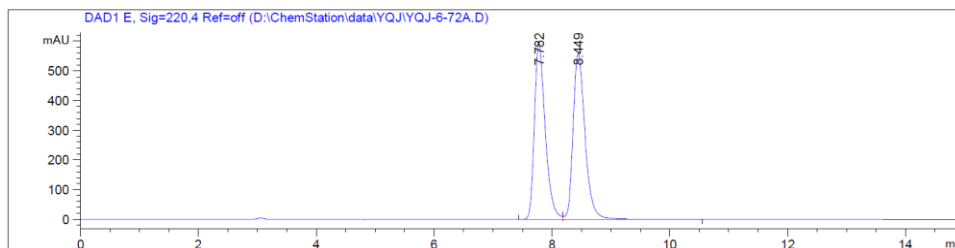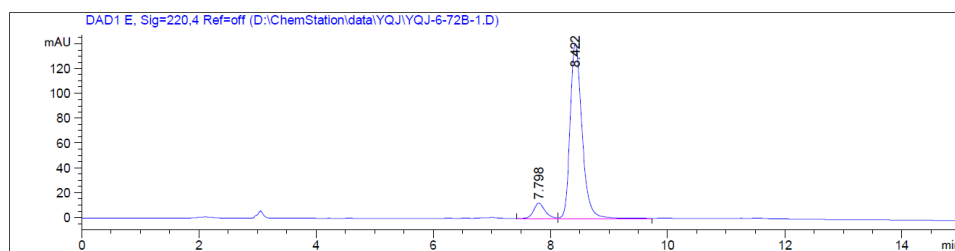

| Peak # | RetTime [min] | Type | Width [min] | Area [mAU*s] | Height [mAU] | Area %  |
|--------|---------------|------|-------------|--------------|--------------|---------|
| 1      | 7.798         | BV   | 0.2010      | 164.64848    | 12.39413     | 7.7495  |
| 2      | 8.422         | VB   | 0.2125      | 1959.98535   | 140.68675    | 92.2505 |

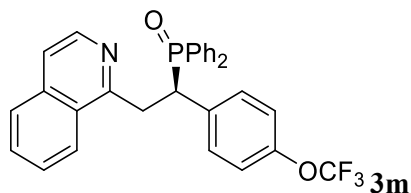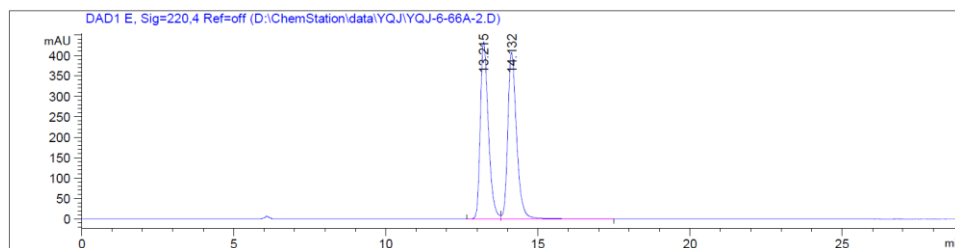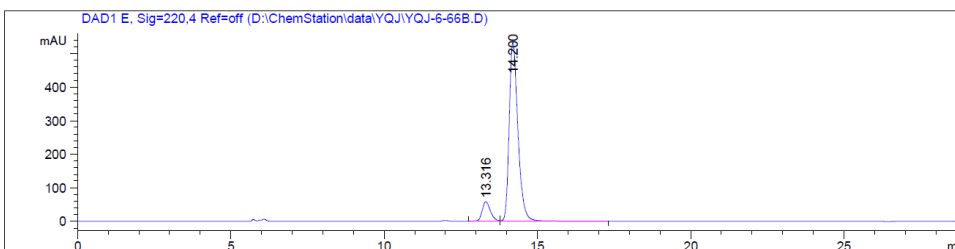

| Peak # | RetTime [min] | Type | Width [min] | Area [mAU*s] | Height [mAU] | Area %  |
|--------|---------------|------|-------------|--------------|--------------|---------|
| 1      | 13.316        | BV   | 0.2906      | 1121.09253   | 58.76810     | 9.4994  |
| 2      | 14.200        | VB   | 0.3058      | 1.06807e4    | 532.93268    | 90.5006 |

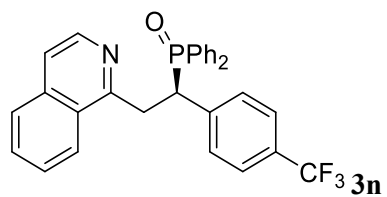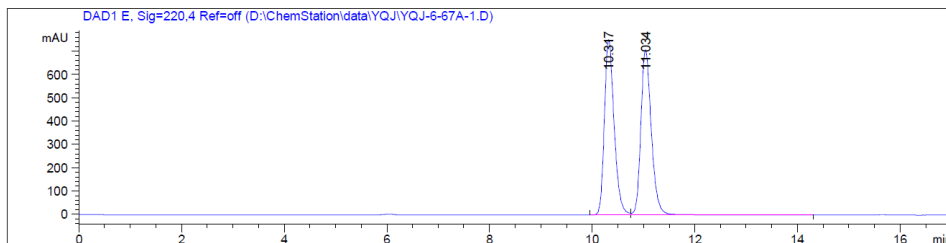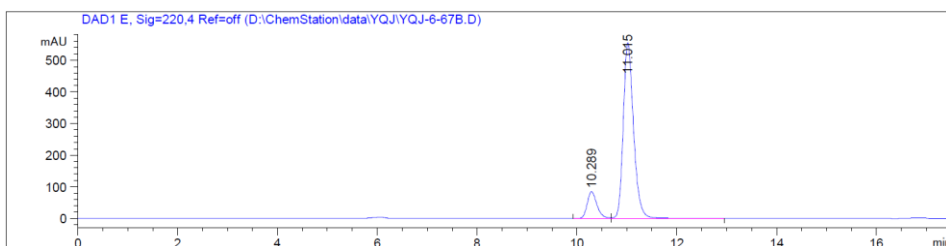

| Peak # | RetTime [min] | Type | Width [min] | Area [mAU*s] | Height [mAU] | Area %  |
|--------|---------------|------|-------------|--------------|--------------|---------|
| 1      | 10.289        | BV   | 0.2064      | 1147.58838   | 84.54351     | 12.6018 |
| 2      | 11.015        | VB   | 0.2193      | 7958.98340   | 554.86871    | 87.3982 |

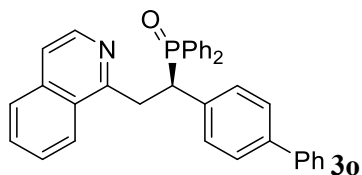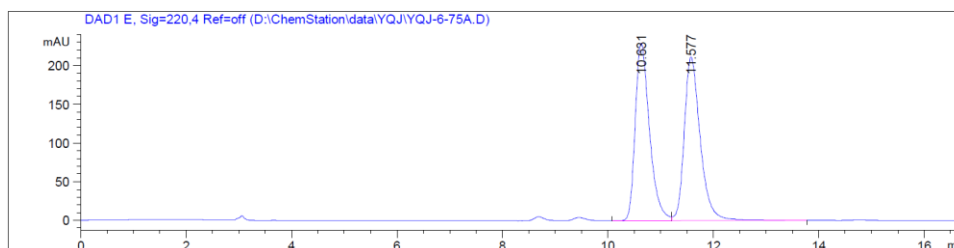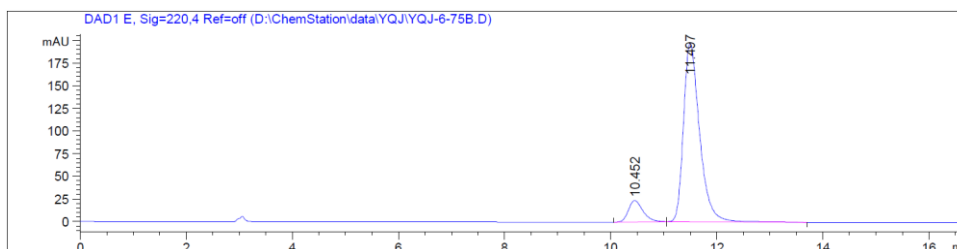

| Peak # | RetTime [min] | Type | Width [min] | Area [mAU*s] | Height [mAU] | Area %  |
|--------|---------------|------|-------------|--------------|--------------|---------|
| 1      | 10.452        | BB   | 0.2887      | 449.05002    | 23.73730     | 9.7635  |
| 2      | 11.497        | BB   | 0.3192      | 4150.23047   | 197.48311    | 90.2365 |

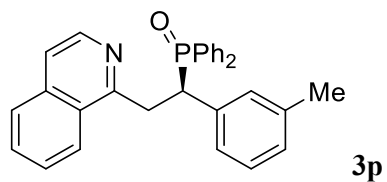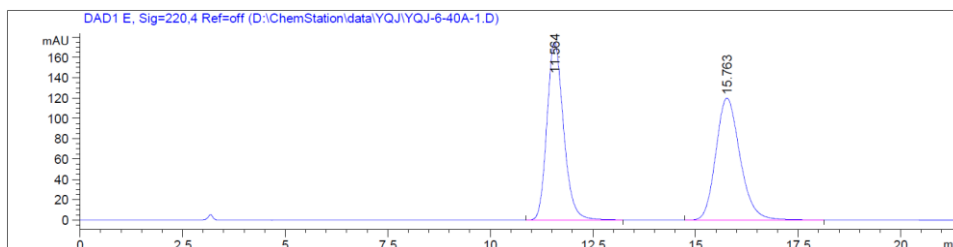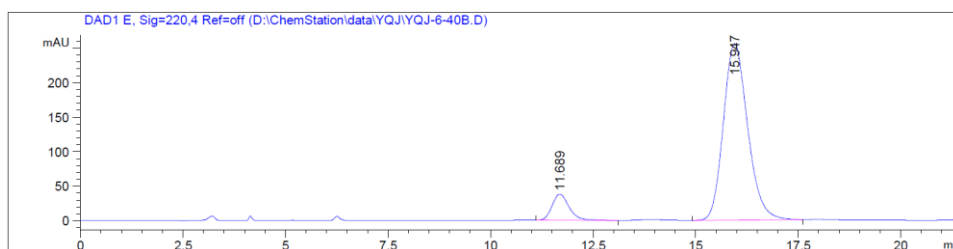

| Peak # | RetTime [min] | Type | Width [min] | Area [mAU*s] | Height [mAU] | Area %  |
|--------|---------------|------|-------------|--------------|--------------|---------|
| 1      | 11.689        | BB   | 0.4409      | 1085.15613   | 37.80371     | 9.3362  |
| 2      | 15.947        | BB   | 0.6370      | 1.05379e4    | 255.58505    | 90.6638 |

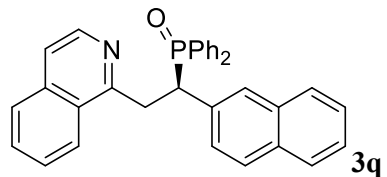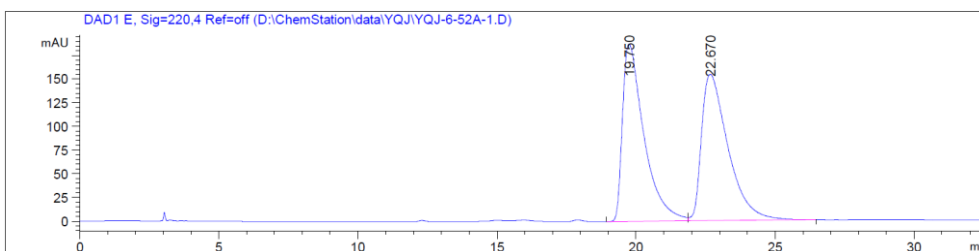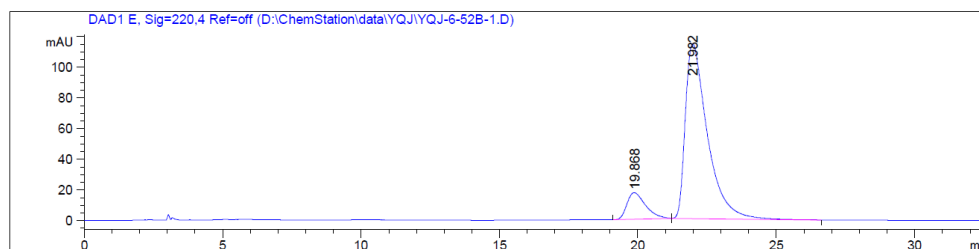

| Peak # | RetTime [min] | Type | Width [min] | Area [mAU*s] | Height [mAU] | Area %  |
|--------|---------------|------|-------------|--------------|--------------|---------|
| 1      | 19.868        | BB   | 0.6989      | 806.75586    | 17.33565     | 11.3236 |
| 2      | 21.982        | BB   | 0.8295      | 6317.79834   | 114.18504    | 88.6764 |

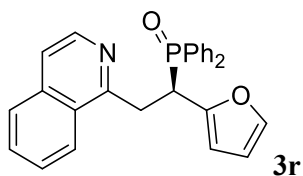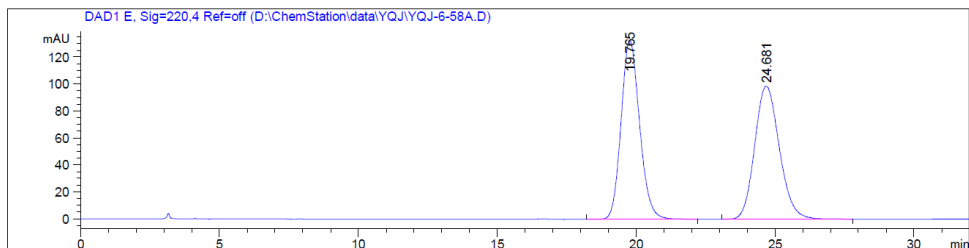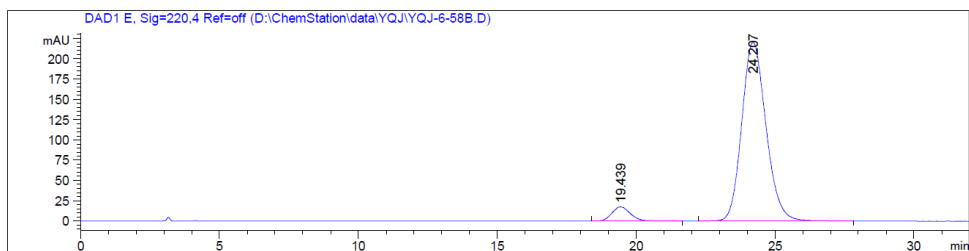

| Peak # | RetTime [min] | Type | Width [min] | Area [mAU*s] | Height [mAU] | Area %  |
|--------|---------------|------|-------------|--------------|--------------|---------|
| 1      | 19.439        | BB   | 0.6939      | 820.58801    | 17.47355     | 5.7930  |
| 2      | 24.207        | BB   | 0.9359      | 1.33446e4    | 219.93776    | 94.2070 |

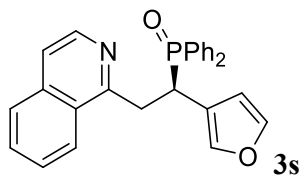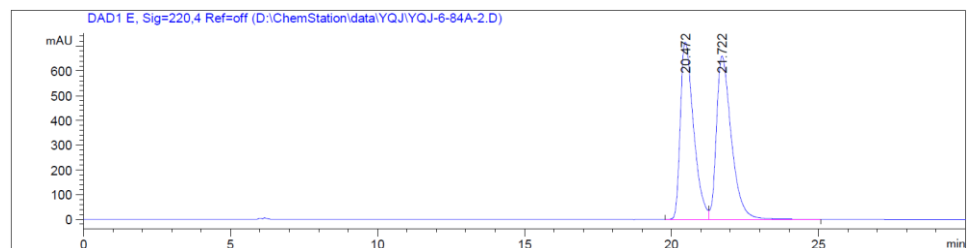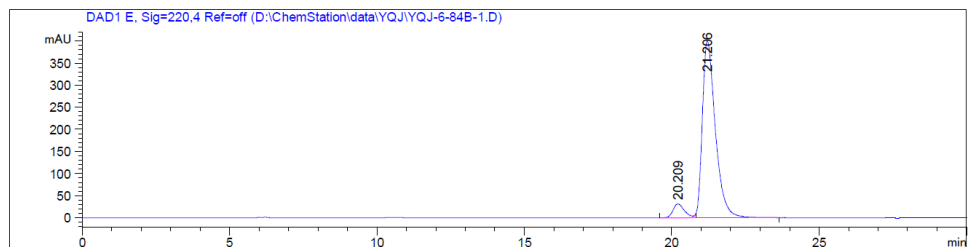

| Peak # | RetTime [min] | Type | Width [min] | Area [mAU*s] | Height [mAU] | Area %  |
|--------|---------------|------|-------------|--------------|--------------|---------|
| 1      | 20.209        | BV E | 0.4077      | 828.83881    | 31.22442     | 6.3198  |
| 2      | 21.206        | VB R | 0.4663      | 1.22861e4    | 400.02533    | 93.6802 |

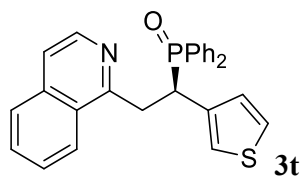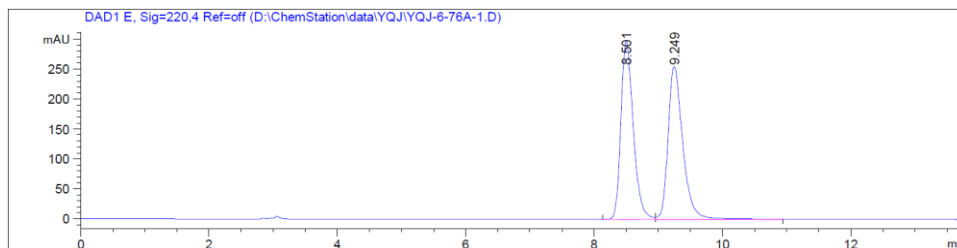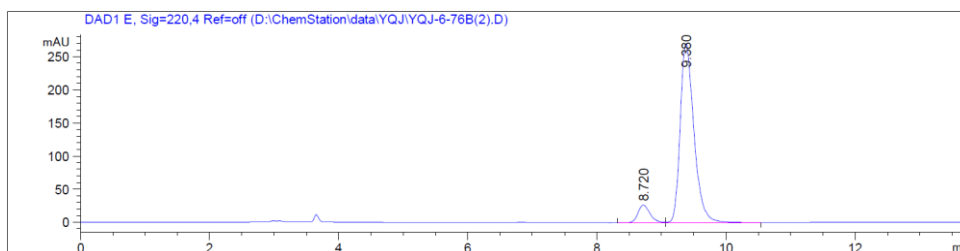

| Peak # | RetTime [min] | Type | Width [min] | Area [mAU*s] | Height [mAU] | Area %  |
|--------|---------------|------|-------------|--------------|--------------|---------|
| 1      | 8.720         | BV   | 0.1968      | 345.94144    | 26.76179     | 7.9528  |
| 2      | 9.380         | VB   | 0.2265      | 4003.99048   | 270.77197    | 92.0472 |

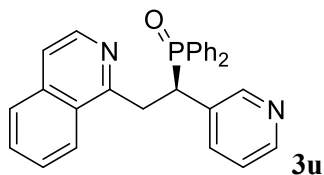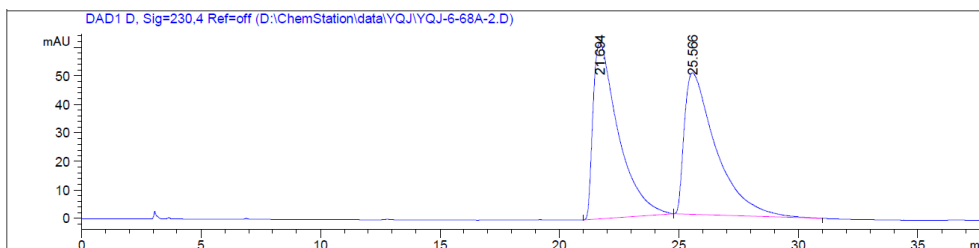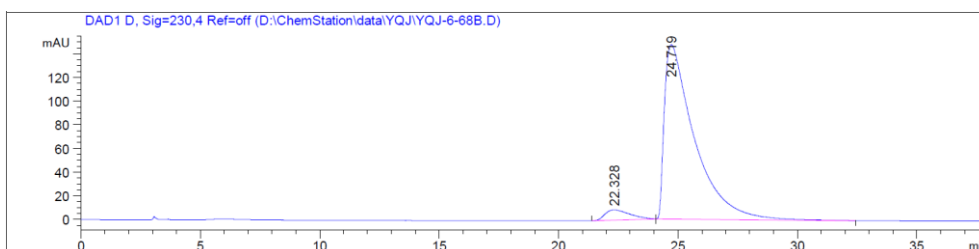

| Peak # | RetTime [min] | Type | Width [min] | Area [mAU*s] | Height [mAU] | Area %  |
|--------|---------------|------|-------------|--------------|--------------|---------|
| 1      | 22.328        | BB   | 0.9741      | 621.65222    | 8.63255      | 4.5944  |
| 2      | 24.719        | BB   | 1.2544      | 1.29090e4    | 147.59764    | 95.4056 |

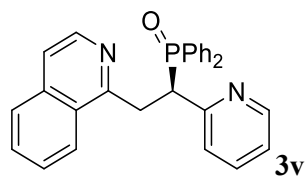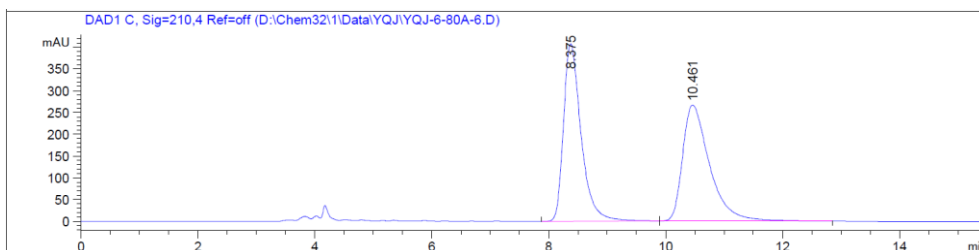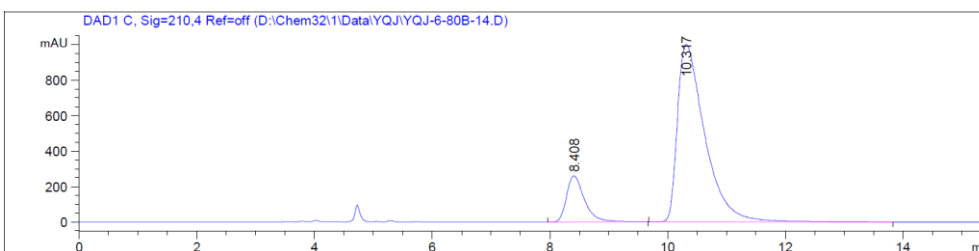

| Peak # | RetTime [min] | Type | Width [min] | Area [mAU*s] | Height [mAU] | Area %  |
|--------|---------------|------|-------------|--------------|--------------|---------|
| 1      | 8.408         | BB   | 0.3199      | 5492.47510   | 260.54111    | 14.5136 |
| 2      | 10.317        | BB   | 0.4834      | 3.23513e4    | 999.95404    | 85.4864 |

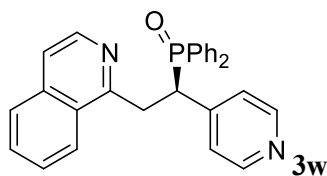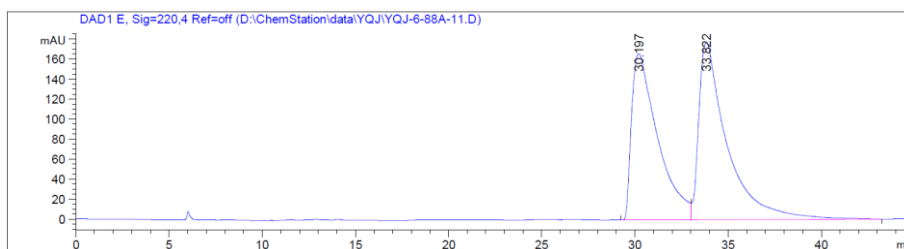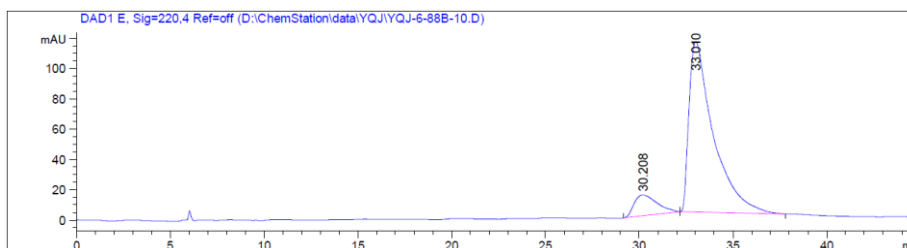

| Peak # | RetTime [min] | Type | Width [min] | Area [mAU*s] | Height [mAU] | Area %  |
|--------|---------------|------|-------------|--------------|--------------|---------|
| 1      | 30.208        | BB   | 1.0191      | 1169.71838   | 13.71418     | 10.3286 |
| 2      | 33.010        | BB   | 1.2931      | 1.01553e4    | 112.50748    | 89.6714 |

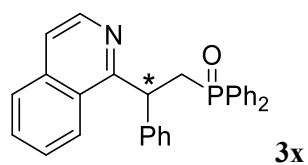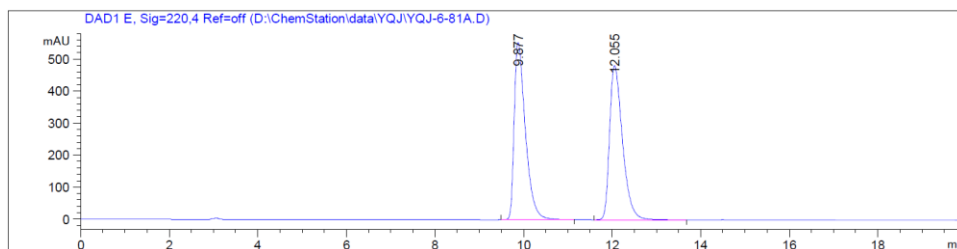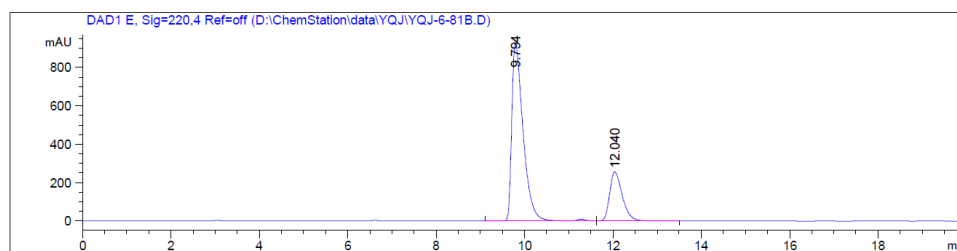

| Peak # | RetTime [min] | Type | Width [min] | Area [mAU*s] | Height [mAU] | Area %  |
|--------|---------------|------|-------------|--------------|--------------|---------|
| 1      | 9.794         | BV R | 0.2678      | 1.66016e4    | 924.13495    | 76.4617 |
| 2      | 12.040        | VB   | 0.3047      | 5110.71924   | 256.25525    | 23.5383 |

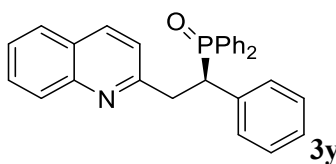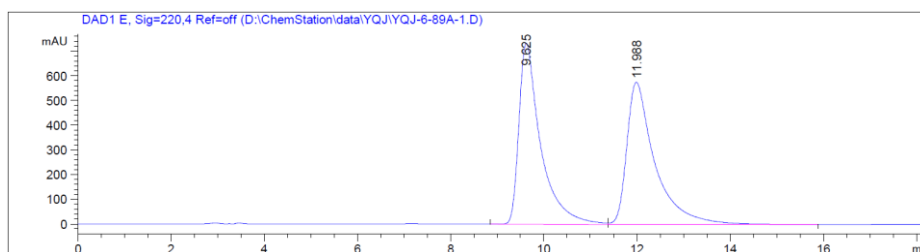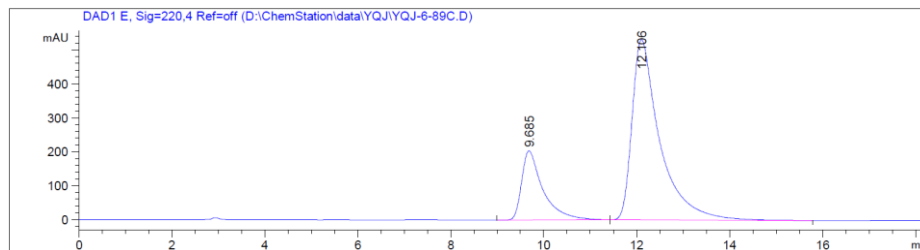

| Peak # | RetTime [min] | Type | Width [min] | Area [mAU*s] | Height [mAU] | Area %  |
|--------|---------------|------|-------------|--------------|--------------|---------|
| 1      | 9.685         | BB   | 0.4612      | 6478.93311   | 203.62070    | 22.6766 |
| 2      | 12.106        | BB   | 0.5991      | 2.20920e4    | 531.35138    | 77.3234 |



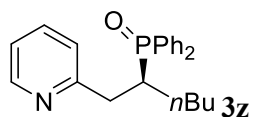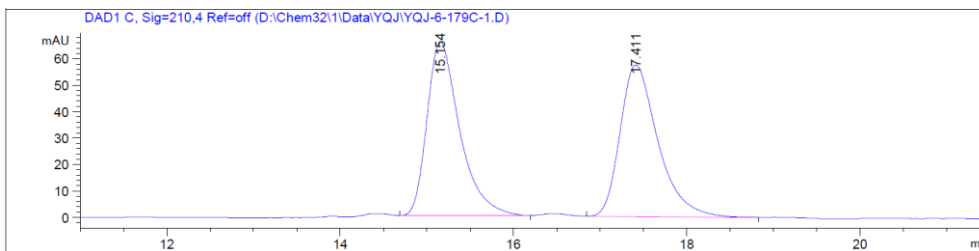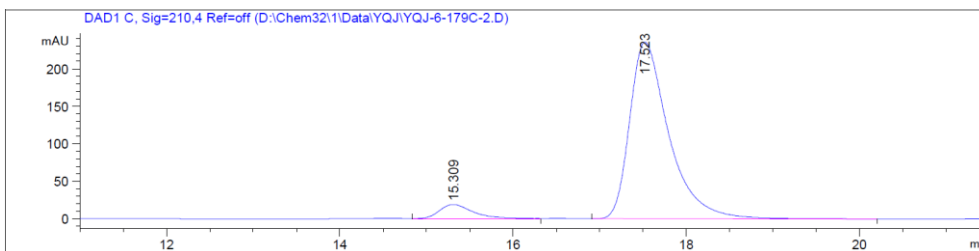

| Peak # | RetTime [min] | Type | Width [min] | Area [mAU*s] | Height [mAU] | Area %  |
|--------|---------------|------|-------------|--------------|--------------|---------|
| 1      | 15.309        | BB   | 0.3910      | 500.66428    | 18.90267     | 6.3010  |
| 2      | 17.523        | BB   | 0.4701      | 7445.10400   | 235.94881    | 93.6990 |

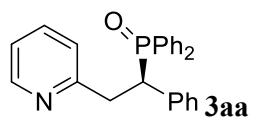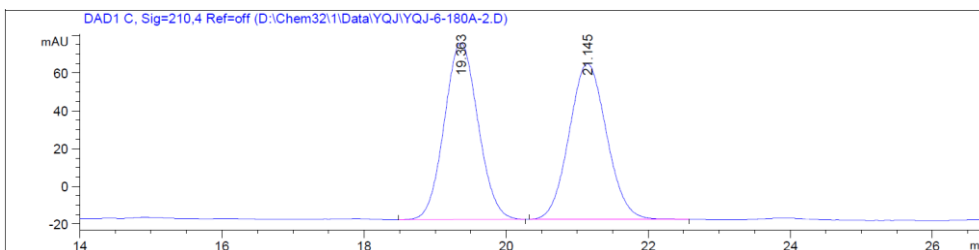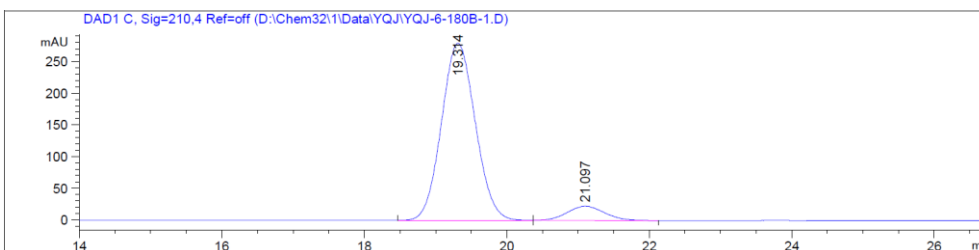

| Peak # | RetTime [min] | Type | Width [min] | Area [mAU*s] | Height [mAU] | Area %  |
|--------|---------------|------|-------------|--------------|--------------|---------|
| 1      | 19.314        | BB   | 0.5145      | 9215.66797   | 279.62097    | 91.9277 |
| 2      | 21.097        | BB   | 0.5421      | 809.23901    | 22.26251     | 8.0723  |

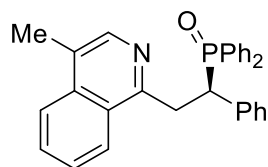

**3ab**

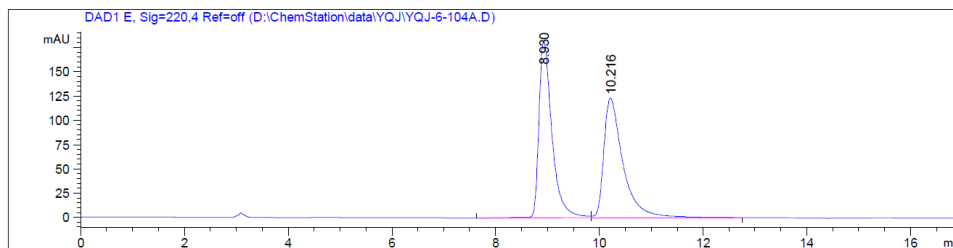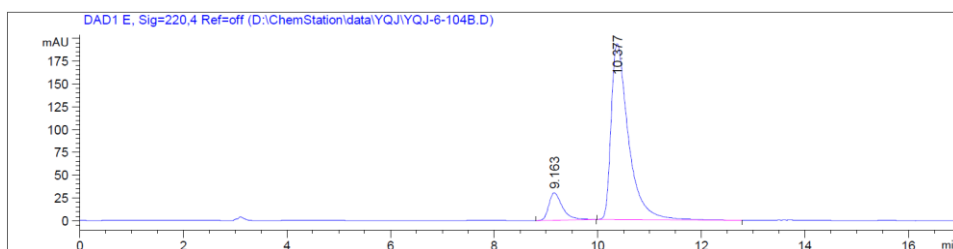

| Peak # | RetTime [min] | Type | Width [min] | Area [mAU*s] | Height [mAU] | Area %  |
|--------|---------------|------|-------------|--------------|--------------|---------|
| 1      | 9.163         | BB   | 0.2729      | 543.02759    | 30.04548     | 10.8051 |
| 2      | 10.377        | BB   | 0.3471      | 4482.64014   | 192.92268    | 89.1949 |

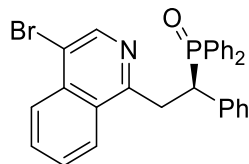

**3ac**

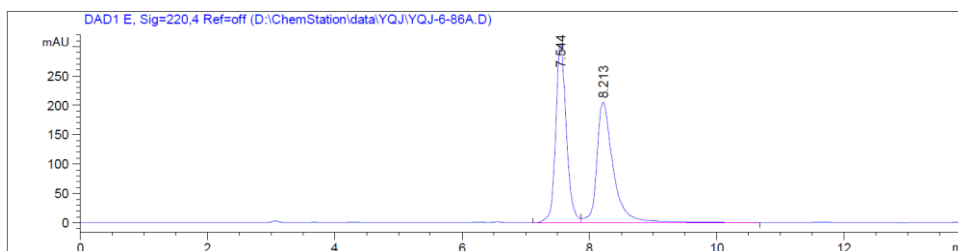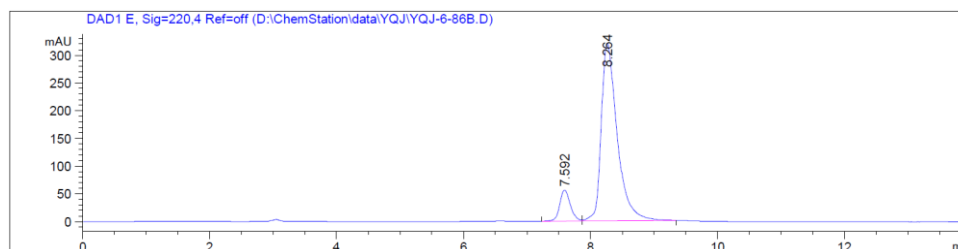

| Peak # | RetTime [min] | Type | Width [min] | Area [mAU*s] | Height [mAU] | Area %  |
|--------|---------------|------|-------------|--------------|--------------|---------|
| 1      | 7.592         | BV   | 0.1781      | 645.65576    | 55.36412     | 10.3730 |
| 2      | 8.264         | VB   | 0.2609      | 5578.74707   | 320.73578    | 89.6270 |

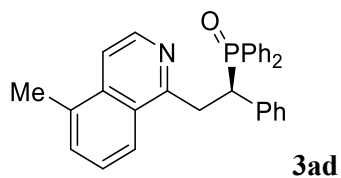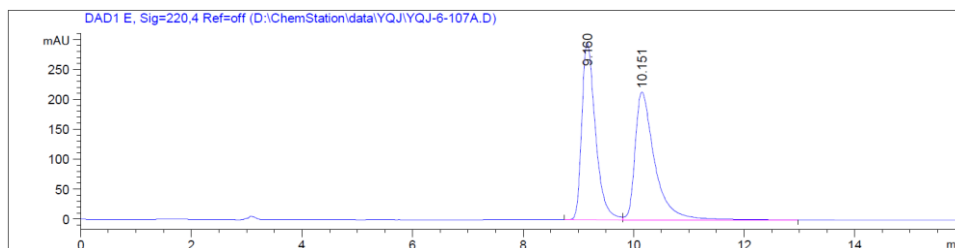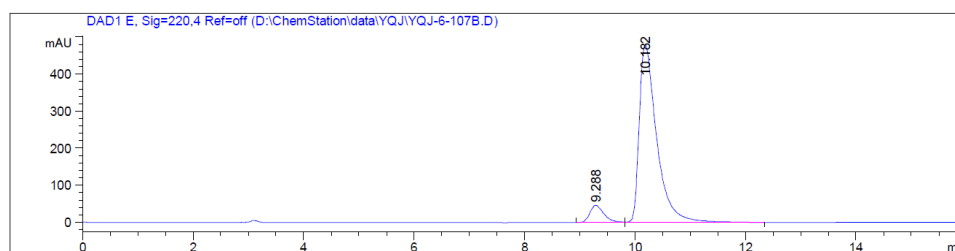

| Peak # | RetTime [min] | Type | Width [min] | Area [mAU*s] | Height [mAU] | Area %  |
|--------|---------------|------|-------------|--------------|--------------|---------|
| 1      | 9.288         | BV   | 0.2671      | 810.40826    | 46.09163     | 7.1503  |
| 2      | 10.182        | VB   | 0.3281      | 1.05235e4    | 479.46295    | 92.8497 |

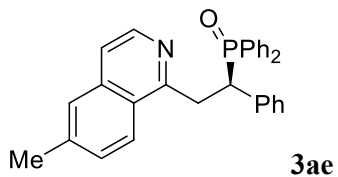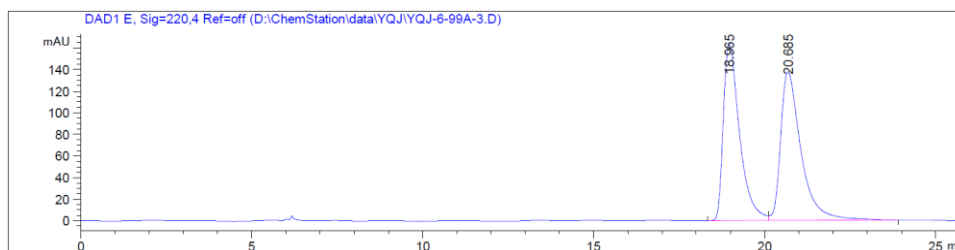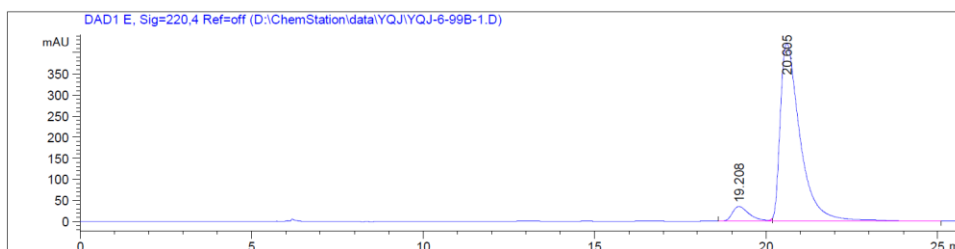

| Peak # | RetTime [min] | Type | Width [min] | Area [mAU*s] | Height [mAU] | Area %  |
|--------|---------------|------|-------------|--------------|--------------|---------|
| 1      | 19.208        | BV E | 0.5149      | 1173.55005   | 34.66728     | 6.4854  |
| 2      | 20.605        | VB R | 0.6046      | 1.69218e4    | 421.26306    | 93.5146 |

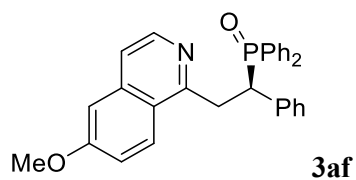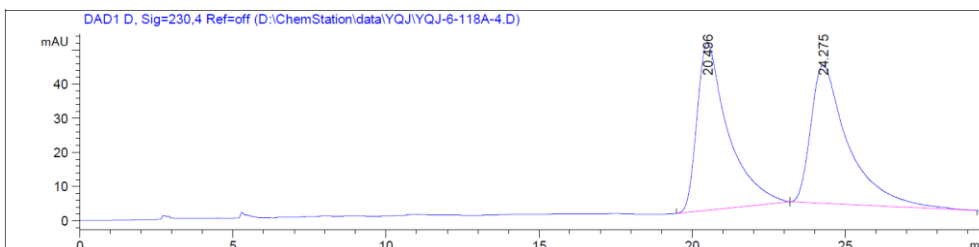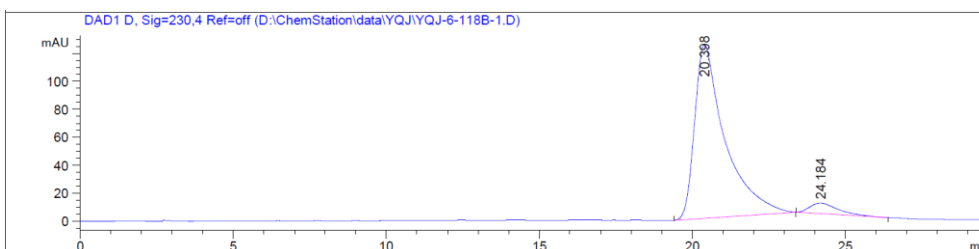

| Peak # | RetTime [min] | Type | Width [min] | Area [mAU*s] | Height [mAU] | Area %  |
|--------|---------------|------|-------------|--------------|--------------|---------|
| 1      | 20.398        | BB   | 0.9748      | 8566.12500   | 124.48142    | 94.5459 |
| 2      | 24.184        | BB   | 0.8884      | 494.15903    | 7.54244      | 5.4541  |

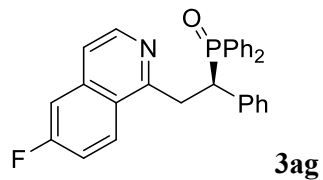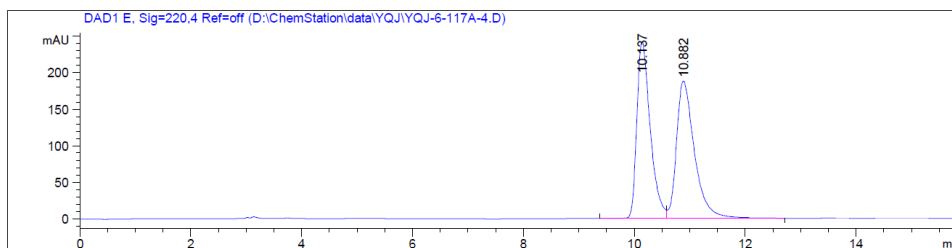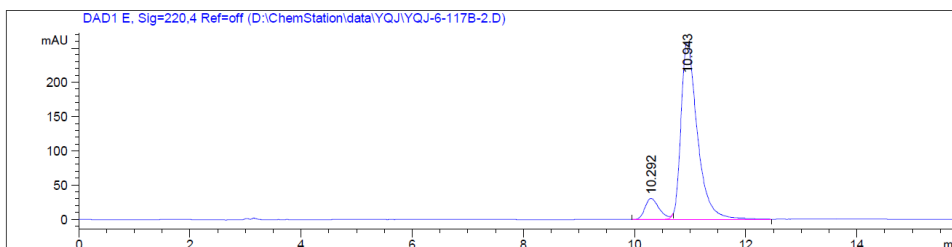

| Peak # | RetTime [min] | Type | Width [min] | Area [mAU*s] | Height [mAU] | Area %  |
|--------|---------------|------|-------------|--------------|--------------|---------|
| 1      | 10.292        | BV E | 0.2680      | 536.00275    | 30.66053     | 9.1870  |
| 2      | 10.943        | VB R | 0.3087      | 5298.38965   | 259.00854    | 90.8130 |

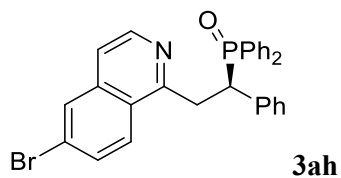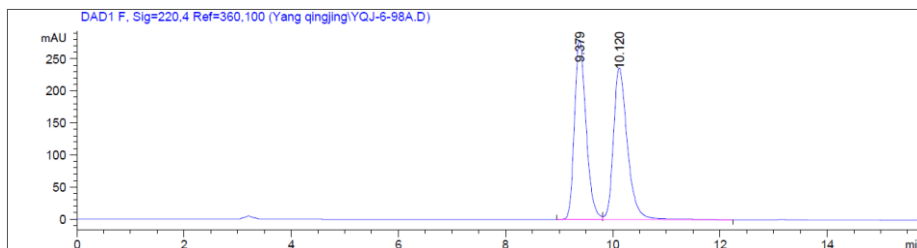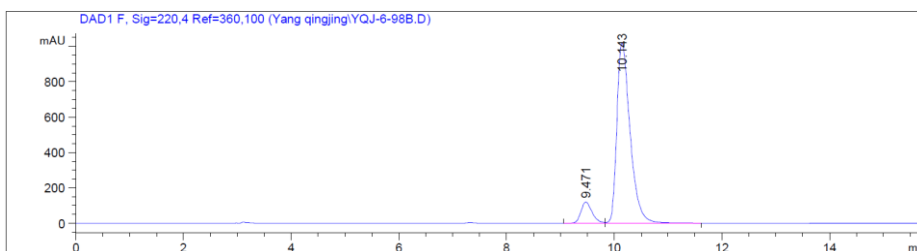

| Peak # | RetTime [min] | Type | Width [min] | Area [mAU*s] | Height [mAU] | Area %  |
|--------|---------------|------|-------------|--------------|--------------|---------|
| 1      | 9.471         | BV   | 0.2229      | 1732.35388   | 119.67129    | 9.0595  |
| 2      | 10.143        | VB   | 0.2586      | 1.73896e4    | 1021.37421   | 90.9405 |

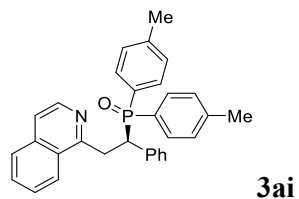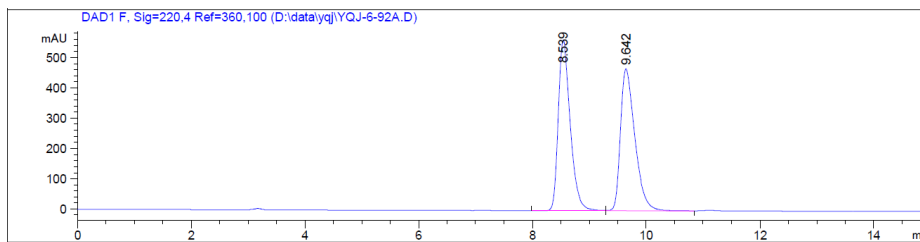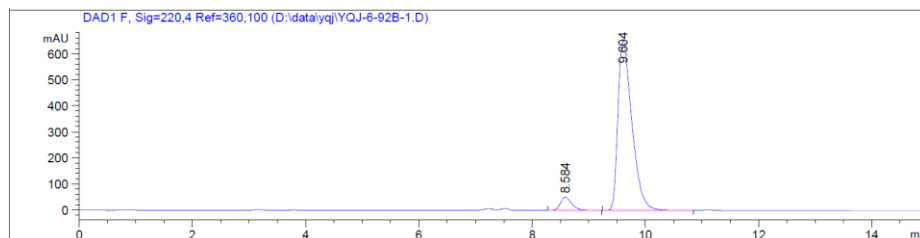

| Peak # | RetTime [min] | Type | Width [min] | Area [mAU*s] | Height [mAU] | Area %  |
|--------|---------------|------|-------------|--------------|--------------|---------|
| 1      | 8.584         | BB   | 0.2137      | 726.45953    | 51.77318     | 6.0852  |
| 2      | 9.604         | BB   | 0.2622      | 1.12116e4    | 653.36737    | 93.9148 |

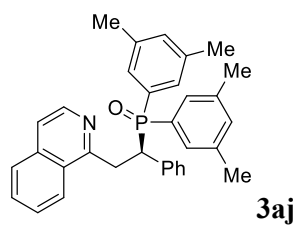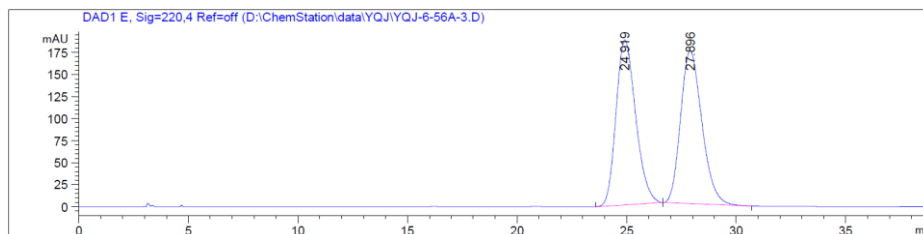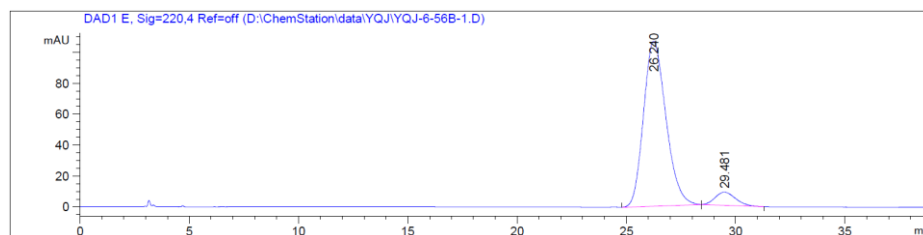

| Peak # | RetTime [min] | Type | Width [min] | Area [mAU*s] | Height [mAU] | Area %  |
|--------|---------------|------|-------------|--------------|--------------|---------|
| 1      | 26.240        | BB   | 1.1009      | 7606.93359   | 106.81522    | 93.2690 |
| 2      | 29.481        | BB   | 0.8328      | 548.97363    | 8.50787      | 6.7310  |

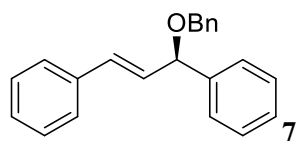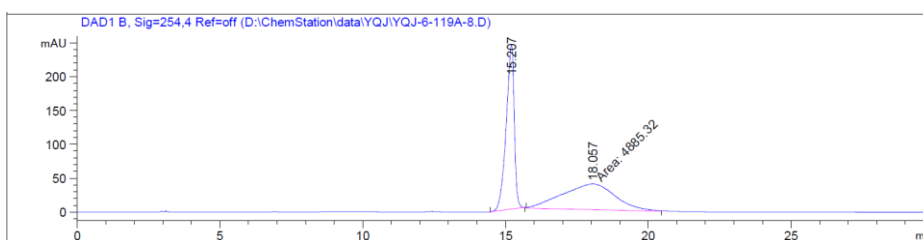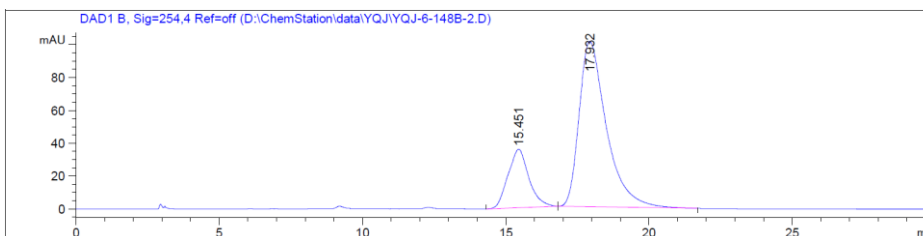

| Peak # | RetTime [min] | Type | Width [min] | Area [mAU*s] | Height [mAU] | Area %  |
|--------|---------------|------|-------------|--------------|--------------|---------|
| 1      | 15.451        | BB   | 0.7083      | 1795.39270   | 35.60445     | 21.2308 |
| 2      | 17.932        | BB   | 0.9859      | 6661.14600   | 100.67923    | 78.7692 |

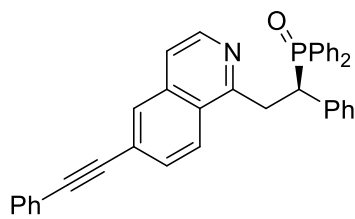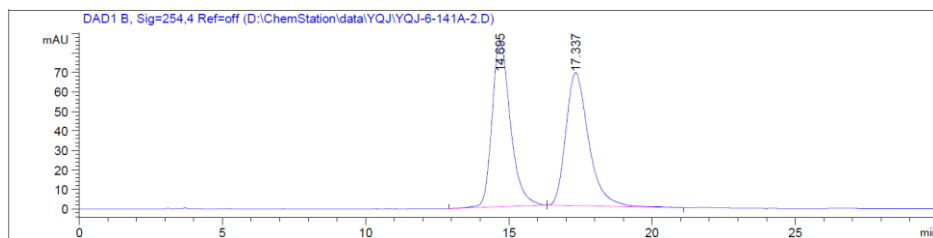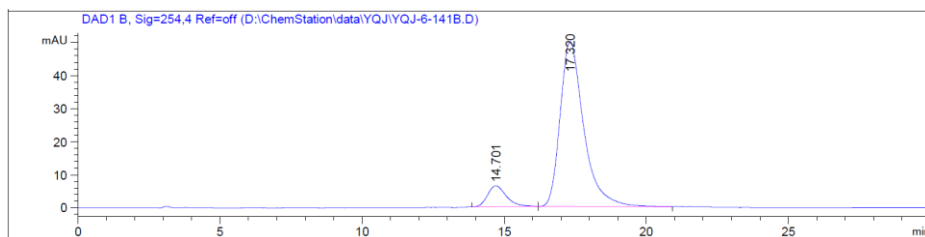

| Peak # | RetTime [min] | Type | Width [min] | Area [mAU*s] | Height [mAU] | Area %  |
|--------|---------------|------|-------------|--------------|--------------|---------|
| 1      | 14.701        | BB   | 0.6463      | 293.42194    | 6.35928      | 9.2397  |
| 2      | 17.320        | BB   | 0.8598      | 2882.22705   | 49.90268     | 90.7603 |
